# Supplementary material for: Heterogeneous Expression of Nuclear Encoded Mitochondrial Genes Distinguishes Inhibitory and Excitatory Neurons
Source: eNeuro. 2021 Aug 7;8(4):ENEURO.0232-21.2021. doi: 10.1523/ENEURO.0232-21.2021 (PMC8387155; doi:10.1523/ENEURO.0232-21.2021)
Supplement: Extended Data Figure 2-1 — Significant TMT MS hits curated by region and mitochondrial localization. Download Figure 2-1, XLSX file. [file enu-eN-NWR-0232-21-s02.xlsx]

## Sheet: C-H
	p value	q value	Cortex	Cortex	Cortex	Cortex	Cortex	Hippocampus	Hippocampus	Hippocampus	Hippocampus	Hippocampus		Fold of Change
Slc1a3	6.148e-10	1.004e-09	13.377	12.299	12.478	12.284	14.225	0	0	0	0	0		12.9326
Dpp10	5.875e-15	7.254e-14	12.663	12.485	12.503	12.474	12.932	0	0	0	0	0		12.6114
Hist1h1d	2.984e-13	1.616e-12	13.111	12.581	12.419	12.431	12.308	0	0	0	0	0		12.57
Rpl26	4.507e-17	2.269e-15	12.569	12.638	12.524	12.418	12.384	0	0	0	0	0		12.5066
Pgm2l1	1.546e-12	6.087e-12	12.452	12.179	12.383	12.262	13.153	0	0	0	0	0		12.4858
Gng3	2.401e-16	7.691e-15	12.371	12.426	12.346	12.434	12.671	0	0	0	0	0		12.4496
Rps21	5.51e-14	4.178e-13	12.323	12.616	12.369	12.534	11.962	0	0	0	0	0		12.3608
Nudc	1.253e-22	6.62e-19	12.243	12.289	12.24	12.279	12.268	0	0	0	0	0		12.2638
Synrg	4.407e-17	2.239e-15	12.386	12.114	12.323	12.228	12.261	0	0	0	0	0		12.2624
Synrg	7.23e-17	3.17e-15	12.353	12.065	12.283	12.178	12.239	0	0	0	0	0		12.2236
Cit	5.314e-17	2.508e-15	12.363	12.197	12.09	12.127	12.206	0	0	0	0	0		12.1966
Scamp5	3.102e-13	1.664e-12	12.135	12.07	12.03	11.992	12.739	0	0	0	0	0		12.1932
Lrp1	1.826e-18	3.175e-16	12.291	12.201	12.144	12.159	12.114	0	0	0	0	0		12.1818
D430041D05Rik	7.135e-13	3.217e-12	12.298	12.483	12.186	12.295	11.586	0	0	0	0	0		12.1696
Cit	6.503e-17	2.937e-15	12.322	12.151	12.045	12.078	12.155	0	0	0	0	0		12.1502
Ppa1	3.945e-16	1.042e-14	12.326	12.165	12.11	12.189	11.956	0	0	0	0	0		12.1492
Acaa2	3.262e-13	1.729e-12	11.908	12.23	12.182	12.321	11.564	0	0	0	0	0		12.041
Khdrbs3	5.75e-12	1.802e-11	12.057	12.267	12.183	12.294	11.239	0	0	0	0	0		12.008
Gripap1	1.377e-14	1.368e-13	12.071	12.165	12.047	12.094	11.643	0	0	0	0	0		12.004
Eif3a	7.71e-18	7.043e-16	12.015	11.913	11.936	11.821	12.013	0	0	0	0	0		11.9396
Rgs7	4.051e-16	1.056e-14	12.136	11.984	11.797	11.848	11.913	0	0	0	0	0		11.9356
Fkbp1a	6.352e-12	1.97e-11	11.954	11.505	11.777	11.75	12.669	0	0	0	0	0		11.931
Camk4	1.656e-19	8.751e-17	11.898	11.934	11.988	11.858	11.949	0	0	0	0	0		11.9254
Gm45837	2.466e-12	8.854e-12	11.793	11.515	11.717	11.571	12.483	0	0	0	0	0		11.8158
Usp9x	3.467e-15	5.021e-14	11.704	11.752	11.742	11.706	12.105	0	0	0	0	0		11.8018
Slc4a10	6.278e-14	4.66e-13	11.878	11.708	11.58	11.619	12.181	0	0	0	0	0		11.7932
Usp9x	4.258e-15	5.891e-14	11.704	11.727	11.724	11.673	12.095	0	0	0	0	0		11.7846
Eif4g3	2.579e-16	7.901e-15	11.595	11.796	11.838	11.727	11.922	0	0	0	0	0		11.7756
Slc4a10	4.693e-14	3.658e-13	11.851	11.683	11.546	11.587	12.124	0	0	0	0	0		11.7582
Tpp2	1.908e-14	1.732e-13	11.726	11.622	11.648	11.567	12.093	0	0	0	0	0		11.7312
Uso1	1.693e-15	2.992e-14	11.584	11.626	11.783	11.637	11.961	0	0	0	0	0		11.7182
Lars	1.447e-14	1.408e-13	11.551	11.476	11.557	11.5	11.964	0	0	0	0	0		11.6096
Grm3	2.294e-12	8.378e-12	11.738	11.344	11.338	11.274	12.161	0	0	0	0	0		11.571
aco1	1.382e-15	2.528e-14	11.459	11.603	11.638	11.683	11.32	0	0	0	0	0		11.5406
Grin1	1.115e-12	4.588e-12	11.593	11.276	11.337	11.316	12.097	0	0	0	0	0		11.5238
Eef1d	1.041e-14	1.098e-13	11.812	11.364	11.535	11.429	11.345	0	0	0	0	0		11.497
Psmd2	1.107e-12	4.564e-12	11.64	11.144	11.4	11.282	12.015	0	0	0	0	0		11.4962
Acat2	3.436e-15	4.993e-14	11.301	11.5	11.67	11.646	11.356	0	0	0	0	0		11.4946
Myh4	9.924e-11	2.016e-10	12.368	11.652	11.278	11.457	10.713	0	0	0	0	0		11.4936
Add3	1.335e-14	1.336e-13	11.766	11.42	11.394	11.239	11.546	0	0	0	0	0		11.473
Ubxn6	1.406e-14	1.384e-13	11.318	11.621	11.593	11.587	11.183	0	0	0	0	0		11.4604
Acat3	2.588e-15	4.011e-14	11.26	11.432	11.633	11.578	11.324	0	0	0	0	0		11.4454
Syne1	3.252e-16	9.192e-15	11.472	11.582	11.386	11.474	11.252	0	0	0	0	0		11.4332
Rpl34	1.446e-15	2.617e-14	11.453	11.624	11.272	11.429	11.266	0	0	0	0	0		11.4088
Cpsf6	1.872e-11	4.92e-11	12.206	11.259	11.36	11.304	10.893	0	0	0	0	0		11.4044
Mp68	4.55e-13	2.254e-12	11.435	11.776	11.361	11.5	10.936	0	0	0	0	0		11.4016
G3bp2	1.091e-14	1.137e-13	11.701	11.225	11.246	11.396	11.414	0	0	0	0	0		11.3964
Gm45713	2.693e-15	4.125e-14	11.357	11.532	11.181	11.32	11.57	0	0	0	0	0		11.392
Tjp1	1.877e-14	1.716e-13	11.482	11.508	11.434	11.461	11.02	0	0	0	0	0		11.381
Adss	9.493e-16	1.975e-14	11.238	11.551	11.425	11.432	11.224	0	0	0	0	0		11.374
Kif2a	2.336e-14	2.04e-13	11.351	11.246	11.243	11.248	11.728	0	0	0	0	0		11.3632
Git1	1.277e-13	8.082e-13	11.732	11.326	11.145	11.105	11.49	0	0	0	0	0		11.3596
Adam23	4.527e-13	2.247e-12	11.247	11.66	11.465	11.428	10.86	0	0	0	0	0		11.332
Usp14	2.021e-15	3.369e-14	11.287	11.186	11.342	11.243	11.582	0	0	0	0	0		11.328
Plcl2	3.793e-18	4.455e-16	11.255	11.429	11.273	11.354	11.303	0	0	0	0	0		11.3228
Scn2a	2.7e-12	9.566e-12	11.329	11.09	11.149	11.052	11.964	0	0	0	0	0		11.3168
Ppm1h	5.38e-16	1.31e-14	11.422	11.281	11.155	11.226	11.461	0	0	0	0	0		11.309
Snrpd2	9.091e-14	6.216e-13	11.445	11.536	11.321	11.341	10.895	0	0	0	0	0		11.3076
Rpl5	3.579e-16	9.701e-15	11.236	11.426	11.273	11.35	11.1	0	0	0	0	0		11.277
Tjp1	2.525e-14	2.174e-13	11.382	11.405	11.318	11.358	10.903	0	0	0	0	0		11.2732
Eif5	4.956e-16	1.23e-14	11.303	11.409	11.271	11.315	11.062	0	0	0	0	0		11.272
COX2	2.535e-14	2.178e-13	11.262	11.473	11.166	11.456	10.972	0	0	0	0	0		11.2658
Myl12b	6.6e-15	7.874e-14	11.458	11.288	11.304	11.299	10.974	0	0	0	0	0		11.2646
Slc4a4	8.437e-15	9.407e-14	11.212	11.162	11.232	11.133	11.583	0	0	0	0	0		11.2644
Atp1b3	2.049e-13	1.177e-12	10.945	11.135	11.446	11.162	11.629	0	0	0	0	0		11.2634
Rnpep	1.29e-14	1.298e-13	11.101	11.146	11.278	11.195	11.584	0	0	0	0	0		11.2608
Slc17a7	1.437e-09	2.159e-09	11.386	10.596	10.894	10.777	12.636	0	0	0	0	0		11.2578
Serpinb6a	7.364e-15	8.534e-14	10.945	11.253	11.35	11.369	11.355	0	0	0	0	0		11.2544
Ngef	4.663e-15	6.239e-14	11.301	11.161	11.113	10.998	11.431	0	0	0	0	0		11.2008
Rasal1	7.193e-16	1.625e-14	11.122	11.101	11.066	11.278	11.377	0	0	0	0	0		11.1888
Zfr	3.096e-15	4.596e-14	11.033	11.273	11.318	11.32	10.997	0	0	0	0	0		11.1882
Nars	1.01e-13	6.703e-13	11.149	11.022	11.077	11.063	11.62	0	0	0	0	0		11.1862
Stx7	1.836e-16	6.302e-15	11.041	11.25	11.305	11.184	11.077	0	0	0	0	0		11.1714
Inpp4a	1.063e-17	8.586e-16	11.054	11.249	11.202	11.194	11.111	0	0	0	0	0		11.162
Rps24	2.02e-18	3.175e-16	11.188	11.137	11.259	11.103	11.117	0	0	0	0	0		11.1608
Ap2s1	4.383e-15	5.939e-14	11.168	11.136	10.961	11.111	11.421	0	0	0	0	0		11.1594
Exoc7	5.228e-15	6.749e-14	11.016	11.349	11.204	11.232	10.93	0	0	0	0	0		11.1462
Cdc42bpb	7.15e-17	3.17e-15	11.1	11.08	11.148	11.037	11.294	0	0	0	0	0		11.1318
Rpl30	1.783e-12	6.87e-12	11.035	11.481	11.121	11.403	10.593	0	0	0	0	0		11.1266
Psmd12	1.024e-14	1.084e-13	10.941	11.024	11.157	11.071	11.422	0	0	0	0	0		11.123
Smarcc2	1.052e-19	6.18e-17	11.077	11.142	11.104	11.069	11.173	0	0	0	0	0		11.113
Rpl5	3.003e-15	4.483e-14	11.001	11.28	11.102	11.188	10.876	0	0	0	0	0		11.0894
Uggt1	2.209e-15	3.604e-14	11.182	11.226	11.015	11.151	10.853	0	0	0	0	0		11.0854
Sipa1l1	1.171e-17	9.102e-16	11.203	11.113	11.02	11.066	11.01	0	0	0	0	0		11.0824
Acadvl	2.311e-17	1.508e-15	11.092	11.094	10.977	11.022	11.204	0	0	0	0	0		11.0778
Gabra1	1.195e-12	4.882e-12	10.979	10.867	10.952	10.919	11.669	0	0	0	0	0		11.0772
Ppp2r5d	6.564e-18	6.425e-16	11.133	11.155	11.066	11.03	10.976	0	0	0	0	0		11.072
Rpl32	1.108e-14	1.153e-13	11.261	11.175	11.007	11.093	10.777	0	0	0	0	0		11.0626
Farp1	8.242e-16	1.808e-14	10.823	11.096	11.095	11.085	11.172	0	0	0	0	0		11.0542
Slc6a17	2.24e-11	5.691e-11	11.126	10.757	10.762	10.76	11.864	0	0	0	0	0		11.0538
Vps50	2.647e-17	1.619e-15	11.011	10.989	11.033	11.008	11.201	0	0	0	0	0		11.0484
Hibch	2.952e-13	1.605e-12	10.906	11.353	11.107	11.223	10.643	0	0	0	0	0		11.0464
Zranb2	1.033e-15	2.067e-14	11.165	11.077	11.064	11.103	10.807	0	0	0	0	0		11.0432
Ptk2	1.494e-16	5.377e-15	10.979	11.177	11.089	11.064	10.895	0	0	0	0	0		11.0408
Map7d1	1.228e-14	1.248e-13	11.288	11.077	10.898	11.094	10.806	0	0	0	0	0		11.0326
Ranbp2	5.916e-16	1.404e-14	10.992	11.177	11.05	11.067	10.828	0	0	0	0	0		11.0228
Slc25a25	9.261e-15	1.003e-13	10.799	10.957	11.086	10.97	11.286	0	0	0	0	0		11.0196
Smarcc2	4.716e-19	1.415e-16	10.959	11.039	11.009	10.967	11.085	0	0	0	0	0		11.0118
Kctd16	2.033e-12	7.603e-12	11.044	10.812	10.842	10.715	11.597	0	0	0	0	0		11.002
Srsf2	1.431e-14	1.398e-13	11.311	11.026	10.976	10.856	10.838	0	0	0	0	0		11.0014
Ap1m1	4.853e-15	6.429e-14	10.81	10.963	10.91	10.949	11.253	0	0	0	0	0		10.977
Ipo5	1.043e-13	6.878e-13	10.828	10.867	10.975	10.788	11.386	0	0	0	0	0		10.9688
Prkacb	1.049e-13	6.897e-13	10.865	10.847	10.853	10.795	11.38	0	0	0	0	0		10.948
Mical3	1.077e-16	4.218e-15	11.066	11.015	10.879	10.94	10.81	0	0	0	0	0		10.942
Akap7	1.905e-13	1.105e-12	11.073	10.828	10.811	10.654	11.321	0	0	0	0	0		10.9374
Slc25a25	1.719e-14	1.617e-13	10.741	10.834	10.994	10.864	11.241	0	0	0	0	0		10.9348
Gad1	4.904e-14	3.789e-13	10.836	10.805	10.939	10.765	11.308	0	0	0	0	0		10.9306
Rpl27	5.104e-16	1.255e-14	11.085	10.994	10.855	10.777	10.85	0	0	0	0	0		10.9122
Mprip	5.073e-17	2.441e-15	10.829	11.007	10.963	10.938	10.786	0	0	0	0	0		10.9046
Flot1	2.093e-19	9.219e-17	10.923	10.929	10.928	10.91	10.819	0	0	0	0	0		10.9018
Flot1	4.82e-19	1.415e-16	10.923	10.917	10.913	10.898	10.798	0	0	0	0	0		10.8898
Rapgef4	4.51e-16	1.151e-14	10.889	10.858	10.803	10.791	11.093	0	0	0	0	0		10.8868
Tcea1	2.629e-13	1.456e-12	10.982	11.074	10.95	10.966	10.397	0	0	0	0	0		10.8738
Mrpl11	3.547e-12	1.203e-11	10.848	11.221	10.943	11.068	10.243	0	0	0	0	0		10.8646
Ide	1.965e-14	1.772e-13	10.725	10.82	10.806	10.754	11.205	0	0	0	0	0		10.862
Eif4g1	1.063e-14	1.114e-13	10.887	10.798	10.732	10.711	11.156	0	0	0	0	0		10.8568
Xpo1	3.416e-15	4.987e-14	10.759	10.789	10.849	10.756	11.129	0	0	0	0	0		10.8564
Sarnp	7.842e-14	5.555e-13	11.109	10.993	10.753	10.902	10.509	0	0	0	0	0		10.8532
Tfrc	7.653e-16	1.699e-14	10.7	11.002	10.767	10.817	10.969	0	0	0	0	0		10.851
Cars	4.893e-17	2.394e-15	10.801	10.858	10.794	10.765	10.996	0	0	0	0	0		10.8428
Hint2	1.121e-14	1.158e-13	10.654	10.938	10.979	10.999	10.632	0	0	0	0	0		10.8404
Osbpl1a	6.815e-13	3.1e-12	10.863	10.636	10.727	10.595	11.344	0	0	0	0	0		10.833
Palm2	4.424e-15	5.964e-14	10.924	10.698	10.719	10.666	11.033	0	0	0	0	0		10.808
Elavl3	9.943e-13	4.157e-12	10.826	11.056	10.808	11.021	10.264	0	0	0	0	0		10.795
Gng13	8.905e-16	1.89e-14	10.751	10.613	10.836	10.745	10.971	0	0	0	0	0		10.7832
Exoc1	4.605e-13	2.277e-12	10.772	10.59	10.723	10.552	11.27	0	0	0	0	0		10.7814
Spock2	5.841e-15	7.229e-14	10.568	10.792	11.023	10.697	10.756	0	0	0	0	0		10.7672
Rpl8	4.694e-07	5.32e-07	12.285	11.974	11.816	11.768	11.853	0	2.5361	0	3.3363	0		10.7647
Chordc1	2.901e-16	8.565e-15	10.672	10.617	10.833	10.784	10.895	0	0	0	0	0		10.7602
Srsf3	4.105e-15	5.725e-14	10.886	10.802	10.596	10.918	10.582	0	0	0	0	0		10.7568
Ruvbl2	7.79e-17	3.347e-15	10.858	10.81	10.614	10.788	10.701	0	0	0	0	0		10.7542
Parp1	6.189e-15	7.537e-14	10.731	10.992	10.703	10.788	10.527	0	0	0	0	0		10.7482
Dctn4	1.544e-14	1.489e-13	10.78	10.811	10.888	10.84	10.42	0	0	0	0	0		10.7478
Ahcy	2.837e-18	3.657e-16	10.723	10.769	10.687	10.708	10.848	0	0	0	0	0		10.747
Raph1	1.761e-14	1.646e-13	11.067	10.765	10.647	10.632	10.608	0	0	0	0	0		10.7438
Acot9	2.514e-16	7.816e-15	10.576	10.715	10.74	10.793	10.881	0	0	0	0	0		10.741
Erp44	4.601e-16	1.169e-14	10.671	10.809	10.825	10.805	10.545	0	0	0	0	0		10.731
Cfap36	4.165e-12	1.375e-11	10.889	10.956	10.814	10.901	10.054	0	0	0	0	0		10.7228
Ppm1a	2.043e-18	3.175e-16	10.738	10.779	10.754	10.696	10.622	0	0	0	0	0		10.7178
Rabgap1	2.624e-17	1.619e-15	10.585	10.746	10.763	10.682	10.8	0	0	0	0	0		10.7152
Ndel1	5.265e-17	2.507e-15	10.847	10.761	10.629	10.668	10.645	0	0	0	0	0		10.71
Mars	5.927e-15	7.302e-14	10.46	10.684	10.806	10.685	10.903	0	0	0	0	0		10.7076
Dhx9	2.897e-13	1.577e-12	10.734	10.554	10.545	10.509	11.156	0	0	0	0	0		10.6996
Ahsa1	2.224e-15	3.616e-14	10.478	10.742	10.834	10.811	10.632	0	0	0	0	0		10.6994
Pcdh9	1.128e-14	1.161e-13	10.664	10.923	10.729	10.741	10.425	0	0	0	0	0		10.6964
Bzw1	4.187e-12	1.38e-11	10.571	10.422	10.601	10.454	11.335	0	0	0	0	0		10.6766
Enoph1	2.698e-16	8.148e-15	10.857	10.619	10.692	10.63	10.565	0	0	0	0	0		10.6726
Rbm17	6.582e-13	3.014e-12	10.734	10.924	10.696	10.778	10.146	0	0	0	0	0		10.6556
Rgs6	8.617e-19	1.962e-16	10.658	10.628	10.552	10.611	10.699	0	0	0	0	0		10.6296
Hsd17b12	1.33e-12	5.349e-12	10.358	10.409	10.707	10.493	11.152	0	0	0	0	0		10.6238
Rps10	5.882e-13	2.763e-12	10.587	10.453	10.374	10.58	11.121	0	0	0	0	0		10.623
Apoa1	1.845e-15	3.146e-14	10.545	10.77	10.673	10.71	10.415	0	0	0	0	0		10.6226
Sms	5.601e-17	2.574e-15	10.487	10.592	10.739	10.599	10.649	0	0	0	0	0		10.6132
Clstn1	3.006e-18	3.695e-16	10.686	10.571	10.671	10.57	10.549	0	0	0	0	0		10.6094
Exoc4	4.241e-15	5.883e-14	10.682	10.478	10.542	10.481	10.845	0	0	0	0	0		10.6056
Abat	8.168e-07	9.155e-07	12.423	12.077	12.226	12.114	13.238	2.8875	0	2.7225	0	3.4463		10.6043
Trim9	2.4e-12	8.681e-12	10.666	10.916	10.61	10.791	10.014	0	0	0	0	0		10.5994
Dnajb11	4.377e-15	5.939e-14	10.617	10.685	10.591	10.737	10.328	0	0	0	0	0		10.5916
Fermt2	2.215e-12	8.134e-12	10.961	10.329	10.402	10.293	10.97	0	0	0	0	0		10.591
Ndufb11	1.442e-14	1.406e-13	10.854	10.662	10.419	10.598	10.416	0	0	0	0	0		10.5898
Plaa	7.257e-17	3.17e-15	10.458	10.631	10.492	10.606	10.679	0	0	0	0	0		10.5732
Snrnp200	1.536e-15	2.752e-14	10.481	10.516	10.53	10.496	10.812	0	0	0	0	0		10.567
Huwe1	5.407e-15	6.869e-14	10.507	10.482	10.492	10.46	10.845	0	0	0	0	0		10.5572
Myo1b	3.683e-19	1.24e-16	10.583	10.597	10.594	10.493	10.514	0	0	0	0	0		10.5562
Ndufa3	8.803e-14	6.087e-13	10.431	10.713	10.444	10.864	10.306	0	0	0	0	0		10.5516
Emc1	6.428e-19	1.675e-16	10.51	10.574	10.541	10.497	10.625	0	0	0	0	0		10.5494
Psmd13	1.568e-14	1.507e-13	10.484	10.427	10.543	10.423	10.867	0	0	0	0	0		10.5488
Sh3kbp1	9.471e-13	3.998e-12	10.64	10.719	10.567	10.797	10.019	0	0	0	0	0		10.5484
Rpl36a-ps1	3.963e-11	9.172e-11	11.212	10.215	10.272	10.101	10.923	0	0	0	0	0		10.5446
Ganab	9.294e-16	1.942e-14	10.439	10.404	10.642	10.502	10.703	0	0	0	0	0		10.538
Kcnab1	4.224e-13	2.128e-12	10.478	10.336	10.433	10.358	11.009	0	0	0	0	0		10.5228
Tacc1	2.246e-15	3.63e-14	10.645	10.641	10.475	10.542	10.295	0	0	0	0	0		10.5196
Cplx3	2.569e-14	2.197e-13	10.668	10.281	10.474	10.41	10.764	0	0	0	0	0		10.5194
Ank1	3.097e-13	1.663e-12	10.497	10.824	10.45	10.684	10.119	0	0	0	0	0		10.5148
Fcgbp	8.857e-09	1.155e-08	11.281	10.517	9.8953	9.2607	11.614	0	0	0	0	0		10.5136
Etf1	2.218e-18	3.257e-16	10.407	10.526	10.511	10.545	10.563	0	0	0	0	0		10.5104
Top2b	2.011e-16	6.769e-15	10.435	10.676	10.519	10.513	10.4	0	0	0	0	0		10.5086
Dctn6	9.322e-12	2.737e-11	10.65	10.78	10.629	10.672	9.7786	0	0	0	0	0		10.5019
Mccc1	9.902e-15	1.053e-13	10.734	10.58	10.451	10.443	10.269	0	0	0	0	0		10.4954
Ppt1	3.846e-13	1.978e-12	10.312	10.689	10.634	10.707	10.089	0	0	0	0	0		10.4862
Raly	1.276e-12	5.166e-12	10.557	10.731	10.555	10.633	9.9266	0	0	0	0	0		10.4805
Nploc4	9.719e-15	1.04e-13	10.28	10.603	10.644	10.551	10.301	0	0	0	0	0		10.4758
Rab3gap2	4.531e-18	4.989e-16	10.415	10.547	10.403	10.454	10.531	0	0	0	0	0		10.47
Cul5	1.093e-16	4.249e-15	10.519	10.407	10.349	10.45	10.603	0	0	0	0	0		10.4656
Copa	1.335e-16	5.041e-15	10.295	10.509	10.443	10.51	10.551	0	0	0	0	0		10.4616
Gpm6a	2.291e-11	5.796e-11	10.554	10.181	10.234	10.105	11.212	0	0	0	0	0		10.4572
Cd34	1.92e-11	5.016e-11	10.981	10.169	10.118	10.102	10.898	0	0	0	0	0		10.4536
Wipf2	2.803e-12	9.85e-12	10.559	10.559	10.658	10.648	9.831	0	0	0	0	0		10.451
Dnajc19	1.562e-12	6.144e-12	10.551	10.661	10.528	10.626	9.875	0	0	0	0	0		10.4482
Scg3	8.463e-13	3.657e-12	10.331	10.707	10.608	10.608	9.9681	0	0	0	0	0		10.4444
Cspg5	7.436e-14	5.325e-13	10.618	10.516	10.097	10.339	10.618	0	0	0	0	0		10.4376
Camsap2	1.261e-15	2.374e-14	10.536	10.506	10.435	10.422	10.197	0	0	0	0	0		10.4192
Zfp638	6.339e-15	7.684e-14	10.61	10.49	10.4	10.419	10.166	0	0	0	0	0		10.417
Brsk1	1.637e-13	9.829e-13	10.561	10.615	10.339	10.507	10.011	0	0	0	0	0		10.4066
Apex1	7.287e-18	6.877e-16	10.322	10.432	10.398	10.358	10.503	0	0	0	0	0		10.4026
Flna	1.338e-15	2.477e-14	10.358	10.513	10.443	10.506	10.19	0	0	0	0	0		10.402
Lzts1	1.872e-14	1.716e-13	10.275	10.573	10.487	10.534	10.141	0	0	0	0	0		10.402
Psmb6	1.412e-12	5.632e-12	10.613	10.547	10.364	10.575	9.8444	0	0	0	0	0		10.3887
Mpi	6.375e-13	2.945e-12	10.202	10.616	10.554	10.589	9.9649	0	0	0	0	0		10.3852
Slc17a6	6.132e-16	1.44e-14	10.444	10.422	10.295	10.225	10.527	0	0	0	0	0		10.3826
Scn2b	1.377e-09	2.078e-09	10.661	9.8361	9.94	9.8711	11.588	0	0	0	0	0		10.3792
Ubfd1	1.683e-13	1.002e-12	10.577	10.518	10.411	10.424	9.9583	0	0	0	0	0		10.3777
Capn2	1.219e-14	1.244e-13	10.318	10.371	10.283	10.224	10.674	0	0	0	0	0		10.374
Atxn2	1.256e-13	8.006e-13	10.758	10.158	10.328	10.217	10.394	0	0	0	0	0		10.371
Ndufa13	3.789e-11	8.839e-11	10.781	10.488	10.247	10.706	9.5868	0	0	0	0	0		10.3618
Camk2n1	5.7e-12	1.789e-11	10.778	10.603	10.203	10.421	9.8011	0	0	0	0	0		10.3612
Scrg1	1.845e-15	3.146e-14	10.444	10.452	10.431	10.353	10.123	0	0	0	0	0		10.3606
H2afy2	9.577e-07	1.07e-06	12.071	12.371	12.182	12.176	11.943	2.3219	0	2.8074	0	3.848		10.3531
Paics	5.123e-13	2.477e-12	10.453	10.1	10.239	10.148	10.783	0	0	0	0	0		10.3446
Mylpf	6.516e-11	1.392e-10	10.864	10.634	10.185	10.49	9.5357	0	0	0	0	0		10.3417
Nrn1	9.445e-18	7.799e-16	10.362	10.433	10.299	10.303	10.245	0	0	0	0	0		10.3284
Ube2i	6.483e-13	2.987e-12	10.371	10.03	10.172	10.196	10.775	0	0	0	0	0		10.3088
Fbxl16	1.814e-14	1.676e-13	10.393	10.244	10.133	10.185	10.587	0	0	0	0	0		10.3084
Stub1	1.935e-14	1.751e-13	10.313	10.505	10.36	10.356	10.003	0	0	0	0	0		10.3074
Camk1d	8.558e-12	2.538e-11	10.296	10.01	10.137	10.033	10.968	0	0	0	0	0		10.2888
Reep2	1.374e-14	1.367e-13	10.197	10.159	10.35	10.155	10.569	0	0	0	0	0		10.286
Pgls	2.542e-11	6.331e-11	10.401	10.665	10.288	10.557	9.5157	0	0	0	0	0		10.2853
Kiaa1549	1.582e-14	1.517e-13	10.567	10.312	10.098	10.164	10.281	0	0	0	0	0		10.2844
Sec23a	1.938e-16	6.606e-15	10.334	10.276	10.122	10.272	10.403	0	0	0	0	0		10.2814
Slmap	4.693e-15	6.263e-14	10.36	10.45	10.3	10.257	10.036	0	0	0	0	0		10.2806
Sord	9.688e-14	6.523e-13	10.158	10.461	10.32	10.49	9.9479	0	0	0	0	0		10.2754
Purg	2.513e-16	7.816e-15	10.098	10.279	10.334	10.281	10.381	0	0	0	0	0		10.2746
Ly6h	9.846e-10	1.535e-09	10.085	9.5838	10.317	9.8836	11.453	0	0	0	0	0		10.2645
Cyld	2.324e-18	3.32e-16	10.282	10.314	10.233	10.315	10.175	0	0	0	0	0		10.2638
Magi1	4.952e-14	3.813e-13	10.354	10.386	10.263	10.379	9.8956	0	0	0	0	0		10.2555
Rmdn3	2.486e-16	7.816e-15	10.164	10.226	10.22	10.221	10.44	0	0	0	0	0		10.2542
Nudcd3	1.678e-14	1.59e-13	10.072	10.35	10.431	10.367	10.043	0	0	0	0	0		10.2526
Wdr44	1.502e-17	1.073e-15	10.126	10.279	10.292	10.317	10.235	0	0	0	0	0		10.2498
Stxbp6	9.6e-17	3.903e-15	10.336	10.308	10.093	10.245	10.219	0	0	0	0	0		10.2402
Snx5	5.553e-12	1.757e-11	10.889	10.088	10.061	9.9847	10.113	0	0	0	0	0		10.2271
Ndrg4	1.213e-15	2.331e-14	10.188	10.276	10.078	10.165	10.42	0	0	0	0	0		10.2254
Tmx2	3.872e-11	8.994e-11	10.318	9.88	10.003	9.9055	11.016	0	0	0	0	0		10.2245
Appl1	4.353e-17	2.234e-15	10.122	10.356	10.228	10.184	10.231	0	0	0	0	0		10.2242
Crtc1	8.828e-13	3.784e-12	10.22	10.433	10.284	10.433	9.7144	0	0	0	0	0		10.2169
Usp7	3.856e-14	3.13e-13	10.19	10.187	10.005	10.142	10.545	0	0	0	0	0		10.2138
Rab24	3.25e-13	1.725e-12	10.445	9.9238	10.194	9.9796	10.496	0	0	0	0	0		10.2077
Timm8a1	6.566e-11	1.402e-10	10.262	10.683	10.251	10.462	9.3518	0	0	0	0	0		10.202
Sh3bgrl	2.855e-17	1.715e-15	10.337	10.182	10.129	10.173	10.16	0	0	0	0	0		10.1962
Gcn1	7.073e-16	1.611e-14	10.055	10.318	10.202	10.312	10.093	0	0	0	0	0		10.196
Srsf4	1.387e-15	2.528e-14	10.417	10.207	10.098	10.119	10.125	0	0	0	0	0		10.1932
Gorasp2	7.758e-13	3.426e-12	10.122	10.395	10.386	10.339	9.7103	0	0	0	0	0		10.1905
Cul1	1.993e-16	6.752e-15	10.178	10.14	10.17	10.086	10.36	0	0	0	0	0		10.1868
Kif3a	5.224e-16	1.278e-14	10.356	10.092	10.109	10.111	10.256	0	0	0	0	0		10.1848
Vat1l	2.675e-11	6.619e-11	9.8006	9.8909	10.124	10.162	10.946	0	0	0	0	0		10.1847
Tsnax	1.792e-12	6.882e-12	10.245	10.451	10.301	10.292	9.623	0	0	0	0	0		10.1824
Spast	2.099e-11	5.384e-11	10.159	10.486	10.399	10.432	9.4292	0	0	0	0	0		10.181
Mapk8ip3	2.624e-15	4.044e-14	10.196	10.135	10.073	10.077	10.419	0	0	0	0	0		10.18
Cmpk2	1.042e-11	3.009e-11	10.218	10.557	10.178	10.412	9.5108	0	0	0	0	0		10.1752
Sec22b	3.217e-19	1.24e-16	10.102	10.159	10.17	10.182	10.231	0	0	0	0	0		10.1688
C2cd4cC2CD4	5.698e-12	1.789e-11	10.16	10.377	10.282	10.468	9.5308	0	0	0	0	0		10.1636
Ap1m2	8.368e-14	5.864e-13	9.8552	10.134	10.158	10.189	10.473	0	0	0	0	0		10.1618
Rpl18a	7.817e-12	2.354e-11	10.354	9.9491	9.8733	9.8734	10.753	0	0	0	0	0		10.1606
Trnt1	1.04e-16	4.102e-15	9.9921	10.185	10.211	10.192	10.221	0	0	0	0	0		10.1602
Wnk2	6.286e-17	2.864e-15	10.208	10.138	10.079	10.081	10.287	0	0	0	0	0		10.1586
Tars	2.612e-14	2.23e-13	10.244	10.114	9.9492	10.047	10.438	0	0	0	0	0		10.1584
Atat1	1.081e-11	3.103e-11	10.488	10.351	10.178	10.299	9.4637	0	0	0	0	0		10.1559
Echdc1	1.767e-12	6.826e-12	10.069	10.397	10.336	10.334	9.6253	0	0	0	0	0		10.1523
Rab23	4.493e-14	3.518e-13	10.315	10.177	9.8803	10.017	10.363	0	0	0	0	0		10.1505
Ehbp1	6.88e-14	4.995e-13	10.27	10.298	10.146	10.226	9.7753	0	0	0	0	0		10.1431
Nedd4l	8.066e-12	2.415e-11	10.018	10.58	10.162	10.344	9.549	0	0	0	0	0		10.1306
Cdkl5	2.737e-13	1.51e-12	10.201	10.324	10.078	10.316	9.7096	0	0	0	0	0		10.1257
Armt1	1.04e-16	4.102e-15	10.027	10.129	10.215	10.033	10.223	0	0	0	0	0		10.1254
Camsap3	4.47e-14	3.51e-13	10.175	10.253	10.136	10.278	9.7777	0	0	0	0	0		10.1239
Arhgap26	5.827e-15	7.229e-14	9.8971	10.097	10.27	10.08	10.275	0	0	0	0	0		10.1238
Sec23ip	1.763e-18	3.175e-16	10.169	10.146	10.175	10.059	10.065	0	0	0	0	0		10.1228
Dab2ip	5.196e-15	6.731e-14	10.303	10.247	10.023	10.103	9.9315	0	0	0	0	0		10.1215
Hmgcs1	5.822e-15	7.229e-14	9.9517	10.022	10.174	10.088	10.357	0	0	0	0	0		10.1185
Arhgap5	5.275e-15	6.75e-14	10.174	10.107	9.9736	9.9827	10.348	0	0	0	0	0		10.1171
Plcl1	1.072e-17	8.586e-16	10.006	10.174	10.082	10.107	10.176	0	0	0	0	0		10.109
Rasgrf2	3.295e-14	2.73e-13	10.062	10.065	9.9827	9.9738	10.444	0	0	0	0	0		10.1055
Copb1	4.901e-16	1.222e-14	9.96	10.118	10.11	10.055	10.275	0	0	0	0	0		10.1036
Pdk2	1.071e-12	4.422e-12	9.9235	10.366	10.262	10.302	9.6632	0	0	0	0	0		10.1033
Gm20521	9.299e-16	1.942e-14	10.206	9.9846	10.159	10.171	9.93	0	0	0	0	0		10.0901
Slc39a10	5.778e-15	7.22e-14	10.127	9.9776	10.026	9.9736	10.346	0	0	0	0	0		10.09
ATP8	1.198e-10	2.383e-10	10.017	10.543	10.353	10.347	9.1824	0	0	0	0	0		10.0885
Chmp1a	1.139e-11	3.242e-11	10.13	10.481	10.041	10.349	9.4388	0	0	0	0	0		10.088
Cadm1	1.759e-12	6.802e-12	10.22	10.076	9.7359	9.8561	10.547	0	0	0	0	0		10.087
Lsm12	4.358e-13	2.177e-12	10.092	10.342	9.988	10.316	9.6889	0	0	0	0	0		10.0854
Gtf2i	1.465e-16	5.339e-15	10.009	10.202	10.133	10.108	9.9577	0	0	0	0	0		10.0819
Mrps22	1.23e-11	3.453e-11	10.692	10.099	10.042	10.025	9.5502	0	0	0	0	0		10.0816
Ptma	2.602e-11	6.461e-11	10.506	9.6321	9.9431	9.724	10.598	0	0	0	0	0		10.0806
Mccc2	1.109e-15	2.176e-14	10.002	10.168	10.126	10.159	9.873	0	0	0	0	0		10.0656
Adprh	2.474e-15	3.891e-14	9.8237	10.079	10.097	10.158	10.165	0	0	0	0	0		10.0645
Tenm4	2.068e-17	1.366e-15	10.094	10.125	10.08	10.033	9.9284	0	0	0	0	0		10.0521
Plxna1	3.706e-17	2.019e-15	10.078	9.9405	9.9919	10.061	10.155	0	0	0	0	0		10.0453
Calcoco1	2.141e-14	1.902e-13	10.235	10.161	9.9941	10.051	9.7597	0	0	0	0	0		10.0402
Itsn2	8.196e-18	7.043e-16	10.035	10.139	10.026	10.051	9.9476	0	0	0	0	0		10.0397
Sh3bgrl	5.786e-18	5.996e-16	10.138	9.9898	10.004	9.9893	10.075	0	0	0	0	0		10.0392
Denr	1.24e-16	4.716e-15	10.078	10.035	10.142	9.9513	9.9042	0	0	0	0	0		10.0221
Ak2	2.418e-14	2.098e-13	9.8083	10.173	10.141	10.152	9.8288	0	0	0	0	0		10.0206
Rbm8a	2.911e-11	7.1e-11	10.68	9.6669	9.8056	9.6602	10.289	0	0	0	0	0		10.0203
Nit2	1.465e-11	4.013e-11	10.047	10.272	10.26	10.22	9.2994	0	0	0	0	0		10.0197
Top1	3.069e-15	4.569e-14	10.095	10.193	9.9895	10.012	9.8074	0	0	0	0	0		10.0194
Cd9	3.723e-10	6.415e-10	10.13	9.5643	9.7692	9.5761	11.046	0	0	0	0	0		10.0171
Stoml2	7.949e-14	5.609e-13	10.272	10.097	9.9264	10.053	9.6951	0	0	0	0	0		10.0087
Fdps	1.938e-11	5.054e-11	9.9259	9.6555	9.9006	9.8123	10.748	0	0	0	0	0		10.0085
Plcg1	8.262e-18	7.043e-16	10.003	10.087	9.9767	10.049	9.9093	0	0	0	0	0		10.005
Exoc5	5.25e-15	6.75e-14	9.7532	10.016	10.092	10.002	10.153	0	0	0	0	0		10.0032
Gng5	1.262e-15	2.374e-14	9.7928	10.114	10.088	9.9838	10.036	0	0	0	0	0		10.0029
Rabl6	2.344e-17	1.511e-15	9.9031	9.9577	10.11	10.013	10.022	0	0	0	0	0		10.0012
Lmo7	1.414e-13	8.686e-13	10.094	10.118	10.119	10.082	9.5895	0	0	0	0	0		10.0005
Stxbp5l	2.079e-15	3.445e-14	10.043	10.165	9.9565	10.019	9.7934	0	0	0	0	0		9.99538
Adgrl1	9.833e-14	6.597e-13	10.055	10.184	9.9738	10.126	9.6259	0	0	0	0	0		9.99294
Tecpr1	4.333e-15	5.939e-14	9.7532	10.064	10.047	9.9565	10.14	0	0	0	0	0		9.99214
Eci2	1.849e-13	1.08e-12	9.9341	10.23	10.002	10.154	9.6178	0	0	0	0	0		9.98758
Vcpip1	1.106e-17	8.724e-16	10.06	9.9922	9.9245	9.904	10.049	0	0	0	0	0		9.98594
Cd47	3.837e-07	4.371e-07	11.027	10.398	10.694	10.535	12.079	0	2.263	0	0	2.5607		9.98186
Uba52	5.045e-16	1.246e-14	15.845	15.687	15.782	15.828	15.849	5.6921	5.8099	5.9472	5.8329	5.843		9.97318
Pzp	6.693e-15	7.931e-14	10.198	9.9829	9.9935	9.916	9.7632	0	0	0	0	0		9.97072
Rnf14	3.943e-13	2.016e-12	9.8959	9.6842	10.037	9.8489	10.378	0	0	0	0	0		9.9688
M6pr	1.402e-11	3.86e-11	10.011	9.5945	9.9546	9.6561	10.622	0	0	0	0	0		9.96764
Ptpa	4.023e-13	2.042e-12	10.08	9.7154	9.8939	9.7802	10.364	0	0	0	0	0		9.9667
Fau	1.423e-12	5.67e-12	10.327	9.8975	9.7625	9.6071	10.231	0	0	0	0	0		9.96502
Aamdc	3.67e-13	1.905e-12	10.13	10.146	9.9704	10.056	9.5187	0	0	0	0	0		9.96422
Thumpd1	1.104e-13	7.194e-13	10.314	10.026	9.8927	9.7398	9.837	0	0	0	0	0		9.9619
Numa1	4.359e-13	2.177e-12	10.041	10.215	9.9042	10.096	9.5292	0	0	0	0	0		9.95708
Arl8b	1.272e-08	1.628e-08	10.423	10.247	10.186	10.199	10.791	2.0704	0	0	0	0		9.95512
Prickle2	1.678e-16	5.905e-15	9.9341	9.9821	9.9927	10.066	9.8003	0	0	0	0	0		9.95504
Elfn2	4.741e-15	6.312e-14	9.7731	10.009	10.092	10.074	9.8103	0	0	0	0	0		9.95168
C1qb	1.458e-16	5.339e-15	9.9151	9.9238	9.8163	10.018	10.065	0	0	0	0	0		9.94764
Coro2a	2.294e-15	3.677e-14	9.8057	10.044	9.9723	10.106	9.808	0	0	0	0	0		9.9472
Tcerg1	2.249e-13	1.274e-12	10.284	9.9965	9.8939	9.938	9.6053	0	0	0	0	0		9.94354
Setd2	6.989e-07	7.86e-07	10.738	8.4429	9.5397	8.6703	12.305	0	0	0	0	0		9.93918
Krt5	6.901e-06	7.521e-06	12.982	12.001	11.108	10.769	13.087	3.1699	0	3.7225	0	3.3785		9.93522
Sf3b2	7.193e-15	8.398e-14	10.193	9.8098	9.8094	9.9574	9.9048	0	0	0	0	0		9.93488
Dmwd	9.134e-15	9.938e-14	9.8477	10.102	9.94	10.065	9.7046	0	0	0	0	0		9.93186
Dnajc3	1.074e-15	2.125e-14	9.8464	10.03	10.008	10.009	9.7502	0	0	0	0	0		9.92872
Grm5	3.108e-13	1.666e-12	9.56	9.8622	10.005	9.958	10.257	0	0	0	0	0		9.92844
Acyp2	1.682e-13	1.002e-12	9.9588	10.106	10.027	10.029	9.5204	0	0	0	0	0		9.92824
Rab12	5.909e-14	4.442e-13	9.8566	9.824	9.8024	9.8332	10.285	0	0	0	0	0		9.92024
Ppa2	1.982e-07	2.292e-07	11.103	10.758	10.792	10.747	11.02	2.7655	2.0704	0	0	0		9.91682
Gnao1	1.389e-09	2.093e-09	9.9898	9.2978	9.7717	9.4126	11.112	0	0	0	0	0		9.91678
Rab31	2.87e-13	1.565e-12	10.094	10.155	9.7702	9.9659	9.5463	0	0	0	0	0		9.90628
Nos1	1.713e-14	1.616e-13	9.6228	9.8648	9.9917	10.078	9.9705	0	0	0	0	0		9.90556
Fsd1	8.258e-18	7.043e-16	9.9259	9.8485	9.8544	9.8725	10.01	0	0	0	0	0		9.90226
Cpsf7	5.111e-12	1.637e-11	9.8947	10.159	10.066	10.103	9.2877	0	0	0	0	0		9.90208
Maip1	1.902e-12	7.197e-12	10.25	10.101	9.8616	9.881	9.4166	0	0	0	0	0		9.90204
Pnpo	3.981e-12	1.322e-11	9.9554	10.137	9.9069	10.169	9.3106	0	0	0	0	0		9.89578
Vps13a	2.839e-20	2.501e-17	9.8552	9.9307	9.8659	9.9148	9.9111	0	0	0	0	0		9.89554
Col1a1	6.568e-09	8.721e-09	10.62	9.3709	9.2379	9.1747	11.047	0	0	0	0	0		9.8901
Taco1	7.99e-15	9.081e-14	10.122	9.8027	9.7388	9.7853	9.9669	0	0	0	0	0		9.88314
Fam81a	2.093e-15	3.447e-14	10.06	9.9542	9.8098	9.8425	9.7125	0	0	0	0	0		9.8758
Nrd1	3.14e-14	2.626e-13	9.933	9.7559	9.7607	9.7462	10.183	0	0	0	0	0		9.87576
Atp6v1g1	6.33e-14	4.683e-13	10.152	9.7918	9.7616	9.629	9.9864	0	0	0	0	0		9.86416
Gps1	6.654e-19	1.675e-16	9.8874	9.8569	9.8151	9.8093	9.9256	0	0	0	0	0		9.85886
Eif4g2	4.068e-15	5.717e-14	9.8727	9.8043	9.7136	9.8028	10.099	0	0	0	0	0		9.85848
Ndrg3	5.718e-15	7.161e-14	9.8211	10.076	9.8438	9.8894	9.6523	0	0	0	0	0		9.85652
Ahsg	4.306e-13	2.161e-12	10.052	9.9223	9.9498	9.9541	9.3966	0	0	0	0	0		9.85496
Psme1	6.768e-16	1.555e-14	9.8776	9.748	9.781	9.8069	10.041	0	0	0	0	0		9.8509
Aida	2.74e-12	9.673e-12	9.6242	10.071	10.105	10.052	9.3742	0	0	0	0	0		9.84528
Arglu1	4.351e-13	2.177e-12	10.271	9.8718	9.658	9.6127	9.8085	0	0	0	0	0		9.8444
Gltp	9.996e-14	6.662e-13	9.8083	9.7238	9.7607	9.683	10.218	0	0	0	0	0		9.83876
Ubr4	9.105e-16	1.917e-14	9.6719	9.8007	9.8438	9.8316	10.009	0	0	0	0	0		9.8314
Usp15	1.738e-17	1.177e-15	9.891	9.9142	9.7542	9.8187	9.7602	0	0	0	0	0		9.82766
Cryl1	8.377e-13	3.635e-12	9.6417	9.9975	9.9619	10.103	9.4246	0	0	0	0	0		9.82574
Ccdc93	1.365e-13	8.504e-13	10.104	9.7272	9.6388	9.6221	10.023	0	0	0	0	0		9.82302
Dag1	4.718e-13	2.319e-12	10.047	10.006	9.7907	9.8127	9.3846	0	0	0	0	0		9.8082
Mtor	3.318e-19	1.24e-16	9.8452	9.8453	9.8216	9.744	9.7777	0	0	0	0	0		9.80676
Prex1	4.076e-16	1.056e-14	9.6402	9.9175	9.7517	9.8147	9.873	0	0	0	0	0		9.79942
Tomm40	5.292e-14	4.036e-13	9.5932	10.084	9.7931	9.8918	9.6341	0	0	0	0	0		9.79924
Rap1gds1	5.05e-09	6.848e-09	9.8825	9.1619	9.5192	9.2167	11.212	0	0	0	0	0		9.79846
Rims3	1.254e-10	2.476e-10	9.7532	10.305	9.9325	10.063	8.9218	0	0	0	0	0		9.7951
Csnk2b-Ly6g5b	4.499e-15	6.035e-14	9.611	9.8653	9.9094	9.9214	9.6607	0	0	0	0	0		9.79356
Txndc12	7.839e-16	1.733e-14	9.8849	9.8857	9.7199	9.8452	9.6189	0	0	0	0	0		9.79092
Cd81	6.456e-13	2.977e-12	9.6971	9.6804	9.5662	9.7301	10.262	0	0	0	0	0		9.78716
Metap2	1.452e-13	8.87e-13	9.9318	9.6471	9.5938	9.6408	10.111	0	0	0	0	0		9.7849
Nolc1	4.404e-13	2.196e-12	9.975	9.8962	9.8826	9.8343	9.3273	0	0	0	0	0		9.78308
Gabra3	1.348e-14	1.347e-13	9.5782	9.6595	9.8574	9.8083	10.005	0	0	0	0	0		9.78168
Fmr1	1.963e-19	9.219e-17	9.7233	9.7923	9.7687	9.8379	9.768	0	0	0	0	0		9.77804
Ranbp3	4.079e-14	3.281e-13	9.7967	9.871	9.8489	9.9049	9.4338	0	0	0	0	0		9.77106
Dnaja4	1.792e-14	1.661e-13	9.8389	9.5676	9.8189	9.6277	9.999	0	0	0	0	0		9.77042
Pld3	2.729e-16	8.194e-15	9.7477	9.8181	9.8286	9.843	9.5943	0	0	0	0	0		9.76634
Gm20498	1.407e-13	8.686e-13	10.069	9.5364	9.6607	9.6312	9.9335	0	0	0	0	0		9.76616
Ap1g1	1.172e-10	2.34e-10	10.36	9.4344	9.3729	9.3452	10.309	0	0	0	0	0		9.7643
Gabbr1	6.287e-11	1.351e-10	9.6888	9.4648	9.5925	9.4298	10.597	0	0	0	0	0		9.75458
Arfgef2	1.671e-14	1.586e-13	9.6846	9.7184	9.6954	9.5982	10.045	0	0	0	0	0		9.74832
Aqp4	1.547e-10	2.975e-10	9.5179	10.171	10.073	10.075	8.8997	0	0	0	0	0		9.74732
Psmd5	1.994e-11	5.174e-11	9.4168	10.225	9.803	10.052	9.2346	0	0	0	0	0		9.74628
Hdgfl2	8.881e-16	1.89e-14	9.8186	9.8329	9.7723	9.7612	9.5388	0	0	0	0	0		9.74476
Necab1	9.029e-11	1.852e-10	9.7625	9.1829	9.7146	9.5102	10.547	0	0	0	0	0		9.74344
Capns1	7.585e-11	1.588e-10	9.927	9.3992	9.4751	9.3748	10.525	0	0	0	0	0		9.74022
Acot11	1.895e-14	1.726e-13	9.7437	9.7846	9.4973	9.6819	9.9796	0	0	0	0	0		9.73742
Frrs1l	3.072e-12	1.063e-11	9.5962	9.9927	10.04	9.8104	9.2348	0	0	0	0	0		9.73482
Ttc9	1.317e-15	2.46e-14	9.8351	9.7125	9.8631	9.712	9.5481	0	0	0	0	0		9.73416
Fmr1	6.756e-20	4.463e-17	9.6804	9.7252	9.7269	9.7781	9.7519	0	0	0	0	0		9.7325
Ralbp1	2.299e-14	2.021e-13	9.7771	9.6534	9.6478	9.5531	10.015	0	0	0	0	0		9.72928
Srp54	1.814e-15	3.113e-14	9.5337	9.8697	9.7753	9.7915	9.6692	0	0	0	0	0		9.72788
Son	2.877e-16	8.542e-15	9.726	9.858	9.7259	9.7529	9.5695	0	0	0	0	0		9.72646
Bcap29	1.34e-15	2.477e-14	9.7165	9.8637	9.7687	9.7357	9.522	0	0	0	0	0		9.72132
Itgav	1.782e-15	3.098e-14	9.6548	9.916	9.5782	9.768	9.6753	0	0	0	0	0		9.71846
Slc7a8	7.508e-11	1.574e-10	9.8122	9.3737	9.5716	9.2976	10.517	0	0	0	0	0		9.71442
Ccdc91	2.927e-15	4.391e-14	9.8813	9.7612	9.6525	9.7337	9.5098	0	0	0	0	0		9.7077
Gm11361	7.357e-15	8.534e-14	9.7679	9.6049	9.5645	9.6514	9.9476	0	0	0	0	0		9.70726
Vps4a	5.135e-14	3.922e-13	9.7055	9.8754	9.6774	9.8688	9.3912	0	0	0	0	0		9.70366
Rab33a	8.819e-15	9.71e-14	9.4269	9.7766	9.7539	9.7189	9.8264	0	0	0	0	0		9.70054
Ptges2	8.409e-16	1.829e-14	9.5068	9.7356	9.7142	9.7156	9.8278	0	0	0	0	0		9.7
Snw1	1.604e-13	9.7e-13	9.8552	9.8816	9.719	9.7286	9.3156	0	0	0	0	0		9.7
Sf3b6	2.42e-11	6.073e-11	9.9875	10.012	9.7117	9.8151	8.9721	0	0	0	0	0		9.69968
Xpo7	1.496e-16	5.377e-15	9.6199	9.8588	9.6858	9.691	9.6363	0	0	0	0	0		9.69836
Ccdc25	8.192e-15	9.211e-14	9.8539	9.6699	9.8489	9.6321	9.4844	0	0	0	0	0		9.69784
Eri3	3.201e-12	1.1e-11	9.4369	9.4643	9.7781	9.5548	10.232	0	0	0	0	0		9.69322
Kcnb1	2.216e-13	1.258e-12	9.6902	9.9999	9.7465	9.6877	9.3381	0	0	0	0	0		9.69248
Psmb5	5.138e-15	6.689e-14	9.825	9.816	9.5938	9.7383	9.4866	0	0	0	0	0		9.69194
Vwa8	3.161e-12	1.091e-11	9.8019	9.9843	9.6992	9.8373	9.1308	0	0	0	0	0		9.6907
Mlip	1.293e-13	8.165e-13	9.8019	9.7943	9.7895	9.7687	9.2958	0	0	0	0	0		9.69004
Sort1	1.539e-12	6.064e-12	9.5736	9.5157	9.6862	9.4652	10.207	0	0	0	0	0		9.68954
Ppp2r5c	7.434e-14	5.325e-13	9.5857	9.554	9.6634	9.584	10.048	0	0	0	0	0		9.68702
gB	4.241e-07	4.82e-07	9.3772	10.659	10.689	10.45	7.2536	0	0	0	0	0		9.68576
Akr7a2	2.038e-12	7.617e-12	9.5275	9.8875	9.8072	9.969	9.2092	0	0	0	0	0		9.68008
Arl6ip5	4.081e-11	9.382e-11	9.284	9.4309	9.6485	9.5708	10.447	0	0	0	0	0		9.67624
Atxn10	8.08e-14	5.686e-13	9.8489	9.7994	9.7269	9.6666	9.3226	0	0	0	0	0		9.67288
Jcad	5.436e-14	4.128e-13	9.6257	9.8477	9.8045	9.7228	9.3509	0	0	0	0	0		9.67032
Rasa3	7.963e-18	7.043e-16	9.7546	9.68	9.6786	9.653	9.5721	0	0	0	0	0		9.66766
Src	6.367e-15	7.701e-14	9.8539	9.4967	9.6284	9.5643	9.7908	0	0	0	0	0		9.66682
Ctnna1	1.073e-13	7.039e-13	10.035	9.6392	9.5405	9.4913	9.6195	0	0	0	0	0		9.6651
Tbc1d24	8.677e-17	3.668e-15	9.6958	9.5986	9.6257	9.5765	9.7941	0	0	0	0	0		9.65814
Ptgr2	2.601e-13	1.444e-12	9.5116	9.8759	9.7634	9.7871	9.2921	0	0	0	0	0		9.64602
Rcan1	8.231e-13	3.589e-12	10.111	9.5852	9.5351	9.6242	9.3735	0	0	0	0	0		9.6458
Nae1	5.346e-19	1.487e-16	9.5842	9.6726	9.6295	9.6033	9.6958	0	0	0	0	0		9.63708
Ptprn2	2.976e-16	8.641e-15	9.6373	9.5765	9.7247	9.7458	9.4994	0	0	0	0	0		9.63674
Uhrf1bp1l	8.273e-15	9.283e-14	9.4568	9.7497	9.5477	9.5708	9.8353	0	0	0	0	0		9.63206
Chtop	3.85e-12	1.287e-11	9.8006	9.9091	9.4981	9.8275	9.0951	0	0	0	0	0		9.62608
Adgrb1	6.076e-18	6.059e-16	9.6433	9.6992	9.5498	9.5687	9.6596	0	0	0	0	0		9.62412
Cbx1	9.88e-16	2.016e-14	9.8032	9.6422	9.6079	9.5926	9.4719	0	0	0	0	0		9.62356
Jph3	8.813e-14	6.087e-13	9.8186	9.5876	9.4448	9.3981	9.8525	0	0	0	0	0		9.62032
Suox	3.889e-14	3.152e-13	9.7124	9.7413	9.6851	9.6719	9.2854	0	0	0	0	0		9.61922
Nf1	2.648e-14	2.254e-13	9.5306	9.4838	9.6537	9.4988	9.9144	0	0	0	0	0		9.61626
Txnrd2	3.261e-15	4.814e-14	9.5584	9.7604	9.6355	9.7048	9.4064	0	0	0	0	0		9.6131
Tbc1d10b	9.794e-16	2.006e-14	9.4763	9.6916	9.5774	9.5335	9.7683	0	0	0	0	0		9.60942
Supt16	1.328e-14	1.331e-13	9.7612	9.567	9.5337	9.3872	9.7781	0	0	0	0	0		9.60544
Mpc1	8.968e-12	2.651e-11	9.3527	9.4508	9.6475	9.3387	10.232	0	0	0	0	0		9.60434
Homer2	1.465e-13	8.929e-13	9.7889	9.4639	9.4085	9.4605	9.8953	0	0	0	0	0		9.60342
Emd	2.434e-16	7.749e-15	9.6958	9.7062	9.5544	9.5772	9.4707	0	0	0	0	0		9.60086
Crip1	4.599e-13	2.276e-12	9.5917	9.8286	9.6984	9.6814	9.1596	0	0	0	0	0		9.59194
Bag5	2.394e-15	3.8e-14	9.6154	9.7652	9.4959	9.6411	9.4242	0	0	0	0	0		9.58836
Fga	2.809e-13	1.543e-12	9.4957	9.6804	9.7895	9.7645	9.2102	0	0	0	0	0		9.58806
Endog	1.99e-11	5.17e-11	9.9807	9.8549	9.4592	9.6926	8.9402	0	0	0	0	0		9.58552
Cyb5b	4.923e-09	6.692e-09	10.019	8.9293	9.1233	9.0224	10.826	0	0	0	0	0		9.584
Kcnma1	2.387e-12	8.645e-12	9.4682	9.4658	9.4011	9.4157	10.137	0	0	0	0	0		9.57756
Cyp46a1	4.28e-13	2.151e-12	9.5147	9.4338	9.4164	9.4909	10.023	0	0	0	0	0		9.57576
Eif2s1	7.178e-16	1.625e-14	9.5243	9.7221	9.5498	9.6466	9.4269	0	0	0	0	0		9.57394
Mia3	1.314e-14	1.32e-13	9.781	9.6059	9.5954	9.5621	9.3233	0	0	0	0	0		9.57354
Sart1	6.766e-13	3.083e-12	9.7625	9.7967	9.5028	9.6352	9.1339	0	0	0	0	0		9.56622
Fsd1l	1.387e-15	2.528e-14	9.5721	9.6325	9.5308	9.708	9.3785	0	0	0	0	0		9.56438
Gm43738	9.85e-12	2.863e-11	9.4319	9.2607	9.4998	9.413	10.216	0	0	0	0	0		9.56428
Srsf7	5.621e-11	1.23e-10	10.13	9.2808	9.1163	9.2745	9.9927	0	0	0	0	0		9.55886
Mgll	2.136e-13	1.22e-12	9.46	9.5628	9.3425	9.4755	9.9479	0	0	0	0	0		9.55774
Actr10	1.656e-14	1.574e-13	9.2877	9.6503	9.5232	9.5509	9.7332	0	0	0	0	0		9.54906
Nmt2	3.208e-11	7.707e-11	9.8898	9.1916	9.4321	9.1161	10.103	0	0	0	0	0		9.54652
Ndufb3	2.737e-10	4.88e-10	9.6676	9.127	9.2633	9.1812	10.486	0	0	0	0	0		9.54502
Strbp	1.616e-16	5.733e-15	9.6359	9.582	9.4164	9.4729	9.6099	0	0	0	0	0		9.54342
Ajm1	2.265e-11	5.738e-11	10.143	9.6055	9.4407	9.524	8.983	0	0	0	0	0		9.53924
Gpc4	1.249e-13	7.983e-13	9.2747	9.6717	9.5941	9.7881	9.3531	0	0	0	0	0		9.53634
Hdac6	1.717e-15	3.005e-14	9.326	9.5434	9.5554	9.6652	9.5893	0	0	0	0	0		9.53586
Rbfox1	4.159e-13	2.1e-12	9.502	9.6121	9.6587	9.7815	9.1231	0	0	0	0	0		9.53548
Pcsk2	2.445e-17	1.557e-15	9.6344	9.4872	9.4392	9.5421	9.5622	0	0	0	0	0		9.53302
Mcee	5.228e-13	2.516e-12	9.563	9.8043	9.5131	9.6666	9.115	0	0	0	0	0		9.5324
Gsk3a	1.546e-15	2.76e-14	9.4518	9.7189	9.4073	9.5898	9.4864	0	0	0	0	0		9.53084
Chmp3	1.249e-15	2.374e-14	9.5004	9.6355	9.5958	9.5661	9.3264	0	0	0	0	0		9.52484
Sel1l	1.039e-12	4.321e-12	9.6125	9.3949	9.3547	9.2623	9.9658	0	0	0	0	0		9.51804
Srrt	4.352e-14	3.443e-13	9.8262	9.5557	9.3392	9.4346	9.4305	0	0	0	0	0		9.51724
Inpp5a	4.947e-15	6.459e-14	9.317	9.6114	9.6064	9.6325	9.4037	0	0	0	0	0		9.5142
Ptprd	1.968e-07	2.278e-07	11.741	11.834	11.737	11.813	11.113	2.3785	2.1375	0	3.1538	3		9.51364
Eno3	6.131e-15	7.517e-14	9.5947	9.4678	9.7098	9.4522	9.3222	0	0	0	0	0		9.50934
Pycr3	5.407e-11	1.19e-10	9.6591	9.8248	9.509	9.8283	8.7177	0	0	0	0	0		9.50778
Abhd11	4.439e-12	1.449e-11	9.4235	9.8216	9.6851	9.6404	8.9603	0	0	0	0	0		9.50618
Shtn1	6.971e-13	3.158e-12	9.7041	9.5995	9.5498	9.6286	9.0362	0	0	0	0	0		9.50364
Bag4	8.856e-15	9.731e-14	9.6301	9.2962	9.6676	9.519	9.4051	0	0	0	0	0		9.5036
Eif2a	1.363e-11	3.771e-11	9.6066	9.7782	9.6244	9.6777	8.8179	0	0	0	0	0		9.50096
Aifm3	1.13e-13	7.331e-13	9.5977	9.7087	9.438	9.5848	9.1581	0	0	0	0	0		9.49746
Htatsf1	7.57e-17	3.279e-15	9.6417	9.4592	9.4778	9.484	9.4183	0	0	0	0	0		9.4962
Ttc1	2.543e-14	2.182e-13	9.6433	9.2985	9.4242	9.38	9.7086	0	0	0	0	0		9.49092
Ndufa1	2.98e-13	1.616e-12	9.5337	9.7542	9.1503	9.6335	9.3401	0	0	0	0	0		9.48236
Osbpl8	7.826e-18	7.043e-16	9.4302	9.5634	9.4002	9.4751	9.5078	0	0	0	0	0		9.47534
Emb	1.994e-14	1.789e-13	9.711	9.587	9.3226	9.4242	9.3246	0	0	0	0	0		9.47388
Cntn2	2.903e-10	5.148e-10	9.5932	9.9588	9.4707	9.8096	8.5125	0	0	0	0	0		9.46896
Dnajb2	6.438e-15	7.75e-14	9.5554	9.4907	9.5823	9.503	9.2121	0	0	0	0	0		9.4687
Srp68	8.817e-16	1.89e-14	9.5036	9.4543	9.3805	9.3531	9.6444	0	0	0	0	0		9.46718
Slc25a23	2.216e-16	7.232e-15	9.3367	9.5349	9.3848	9.5486	9.52	0	0	0	0	0		9.465
Ptprj	1.703e-17	1.169e-15	9.4151	9.5662	9.3975	9.4369	9.5086	0	0	0	0	0		9.46486
Gclc	3.755e-19	1.24e-16	9.4151	9.5263	9.4402	9.4816	9.4394	0	0	0	0	0		9.46052
Tgm2	8.287e-13	3.611e-12	9.2877	9.746	9.5687	9.6151	9.0752	0	0	0	0	0		9.45854
Cep170	5.688e-14	4.295e-13	9.7692	9.501	9.3485	9.3904	9.2687	0	0	0	0	0		9.45556
Cetn2	1e-11	2.903e-11	9.8288	9.1589	9.3661	9.0607	9.8549	0	0	0	0	0		9.45388
Bub3	3.723e-14	3.046e-13	9.4202	9.6005	9.5322	9.5657	9.1464	0	0	0	0	0		9.453
Tmem263	1.407e-11	3.869e-11	9.5179	9.7677	9.4892	9.679	8.7869	0	0	0	0	0		9.44814
Ppih	9.919e-19	1.962e-16	9.4715	9.3602	9.4792	9.4496	9.4688	0	0	0	0	0		9.44586
Vps33a	1.281e-13	8.101e-13	9.1378	9.4858	9.4578	9.4022	9.7393	0	0	0	0	0		9.44458
Ppp1r12b	3.848e-13	1.978e-12	9.6605	9.6591	9.3412	9.451	9.0709	0	0	0	0	0		9.43654
Dgki	3.27e-15	4.814e-14	9.4666	9.574	9.4353	9.4943	9.2119	0	0	0	0	0		9.43642
Pds5b	3.088e-14	2.586e-13	9.7082	9.3785	9.3833	9.2213	9.4892	0	0	0	0	0		9.4361
Shtn1	3.911e-13	2.001e-12	9.6462	9.5064	9.4664	9.5442	9.0095	0	0	0	0	0		9.43454
Prmt5	2.296e-15	3.677e-14	9.4909	9.3291	9.2958	9.4143	9.6173	0	0	0	0	0		9.42948
Pdpk1	2.32e-10	4.234e-10	10.321	8.9787	9.5848	9.0877	9.1732	0	0	0	0	0		9.42908
Krt42	3.282e-09	4.592e-09	10.177	8.9975	8.8713	8.7539	10.343	0	0	0	0	0		9.42854
Scn1a	3.399e-17	1.932e-15	9.4151	9.5605	9.3633	9.4102	9.3925	0	0	0	0	0		9.42832
Satb2	3.268e-13	1.73e-12	9.4066	9.7096	9.4494	9.524	9.0496	0	0	0	0	0		9.42784
Pum1	4.88e-17	2.394e-15	9.5163	9.3456	9.505	9.3776	9.3757	0	0	0	0	0		9.42404
Tmx4	7.299e-15	8.496e-14	9.1742	9.4369	9.5236	9.4157	9.5552	0	0	0	0	0		9.42112
Hacd3	9.622e-10	1.505e-09	9.6359	8.9893	9.1051	8.8906	10.473	0	0	0	0	0		9.41878
Gclm	4.647e-12	1.513e-11	9.3545	9.7204	9.4792	9.6397	8.8682	0	0	0	0	0		9.4124
Neo1	6.641e-15	7.904e-14	9.4151	9.5573	9.3047	9.5567	9.2279	0	0	0	0	0		9.41234
Golga2	1.742e-13	1.028e-12	9.5584	9.5137	9.421	9.5368	9.024	0	0	0	0	0		9.41078
Dhx15	6.152e-14	4.586e-13	9.6747	9.2831	9.2953	9.2317	9.5561	0	0	0	0	0		9.40818
Cisd2	9.863e-13	4.134e-12	9.6548	9.207	9.2446	9.1614	9.749	0	0	0	0	0		9.40336
Pepd	2.895e-12	1.011e-11	9.3006	9.6222	9.4929	9.6877	8.9015	0	0	0	0	0		9.40098
Rbp1	2.265e-10	4.148e-10	9.6373	8.9072	9.0872	9.1132	10.243	0	0	0	0	0		9.39758
Mast1	3.628e-17	1.997e-15	9.3024	9.4359	9.4002	9.501	9.3476	0	0	0	0	0		9.39742
Tkfc	1.219e-15	2.334e-14	9.2785	9.4842	9.4854	9.4782	9.2522	0	0	0	0	0		9.3957
Mfn2	7.199e-15	8.398e-14	9.2116	9.5945	9.4788	9.39	9.3029	0	0	0	0	0		9.39556
Prpf31	8.088e-13	3.541e-12	9.5084	9.5662	9.4739	9.5086	8.9171	0	0	0	0	0		9.39484
Gcc2	9.899e-14	6.606e-13	9.5415	9.5718	9.3001	9.4763	9.0741	0	0	0	0	0		9.39276
Ythdf3	3.538e-16	9.701e-15	9.2522	9.4369	9.4256	9.5078	9.3165	0	0	0	0	0		9.3878
Cyb5a	9.25e-14	6.3e-13	9.7328	9.2733	9.3489	9.3731	9.2029	0	0	0	0	0		9.3862
Clasp1	1.034e-08	1.337e-08	9.8173	9.7582	9.6564	9.7868	9.8677	0	0	1.9635	0	0		9.38458
Tsg101	1.908e-14	1.732e-13	9.6691	9.2269	9.321	9.3269	9.3776	0	0	0	0	0		9.3843
Cd82	2.458e-15	3.889e-14	9.3061	9.2974	9.5014	9.2593	9.5417	0	0	0	0	0		9.38118
Prpf8	2.824e-13	1.548e-12	9.5461	9.259	9.1836	9.2004	9.7099	0	0	0	0	0		9.3798
Lsm6	7.342e-13	3.285e-12	9.3385	9.5981	9.4862	9.5236	8.9322	0	0	0	0	0		9.37572
Eif5b	3.478e-16	9.624e-15	9.4617	9.3363	9.2524	9.321	9.4957	0	0	0	0	0		9.37342
Rbfox2	9.826e-13	4.127e-12	9.3807	9.4564	9.4973	9.6252	8.9075	0	0	0	0	0		9.37342
Pitpnb	2.571e-18	3.398e-16	9.3385	9.4323	9.3161	9.343	9.4313	0	0	0	0	0		9.37224
FAM120A	2.406e-14	2.091e-13	9.326	9.2463	9.3077	9.2884	9.673	0	0	0	0	0		9.36828
Cpeb4	1.745e-11	4.638e-11	9.6007	9.6809	9.3498	9.5034	8.6966	0	0	0	0	0		9.36628
Aldh18a1	7.668e-13	3.394e-12	8.9588	9.6284	9.488	9.5068	9.2448	0	0	0	0	0		9.36536
Eif3c	1.639e-14	1.562e-13	9.079	9.4794	9.4242	9.4656	9.3672	0	0	0	0	0		9.36308
Sco1	8.564e-15	9.509e-14	9.3385	9.5563	9.4284	9.3494	9.1398	0	0	0	0	0		9.36248
Mtfr1l	2.095e-11	5.379e-11	9.4731	9.7447	9.2458	9.6151	8.719	0	0	0	0	0		9.35954
Ptp4a1	1.115e-14	1.154e-13	9.1295	9.372	9.5322	9.4666	9.2951	0	0	0	0	0		9.35908
Fam107a	1.235e-10	2.442e-10	9.5243	9.8606	9.3387	9.5417	8.522	0	0	0	0	0		9.35746
ND5	3.309e-10	5.773e-10	9.284	8.9087	9.284	8.9669	10.323	0	0	0	0	0		9.35332
Plxna2	9.45e-19	1.962e-16	9.3224	9.2916	9.3595	9.3735	9.4181	0	0	0	0	0		9.35302
Supt5h	2.837e-12	9.951e-12	9.4844	9.6145	9.2771	9.5473	8.8392	0	0	0	0	0		9.3525
Vps53	4.231e-15	5.883e-14	9.113	9.4574	9.4384	9.3882	9.3606	0	0	0	0	0		9.35152
Wfs1	9.178e-11	1.878e-10	9.4485	8.9559	9.149	9.0353	10.146	0	0	0	0	0		9.34694
Snrpc	2.765e-09	3.929e-09	10.015	8.6664	8.8927	8.8679	10.276	0	0	0	0	0		9.3436
Slc27a4	1.423e-14	1.396e-13	9.5399	9.1469	9.2647	9.2752	9.4707	0	0	0	0	0		9.33948
Thnsl1	9.68e-15	1.038e-13	9.0811	9.3774	9.3244	9.4246	9.4769	0	0	0	0	0		9.33688
Dnm1l	3.748e-11	8.758e-11	13.532	13.552	13.606	13.565	13.979	4.2854	4.3363	3.6781	4.6893	4.5607		9.33684
Arfgap3	3.695e-12	1.245e-11	9.9031	9.1916	9.1546	9.1313	9.3017	0	0	0	0	0		9.33646
Gapvd1	2.118e-13	1.213e-12	9.029	9.5078	9.3001	9.2427	9.6021	0	0	0	0	0		9.33634
Cat	9.102e-15	9.938e-14	9.2859	9.3779	9.4392	9.4778	9.0951	0	0	0	0	0		9.33518
Exoc8	7.667e-13	3.394e-12	9.1702	9.5592	9.3637	9.606	8.9738	0	0	0	0	0		9.33458
Pik3r1	5.73e-13	2.706e-12	9.3841	9.5496	9.4151	9.4334	8.8903	0	0	0	0	0		9.3345
Rptor	9.147e-15	9.938e-14	9.0768	9.4481	9.3298	9.3443	9.4518	0	0	0	0	0		9.33016
Acot1	1.329e-15	2.473e-14	9.1841	9.4557	9.2221	9.3615	9.4174	0	0	0	0	0		9.32816
Aldh3a2	7.585e-13	3.369e-12	8.8848	9.3742	9.5322	9.5288	9.309	0	0	0	0	0		9.3258
Atp6v0c	3.909e-11	9.07e-11	9.1881	9.1135	9.0123	9.2221	10.088	0	0	0	0	0		9.3248
Slc24a2	3.651e-10	6.302e-10	9.6985	8.9736	9.0213	8.7846	10.146	0	0	0	0	0		9.3248
Brsk2	3.619e-15	5.17e-14	9.1841	9.4338	9.2494	9.2458	9.4985	0	0	0	0	0		9.32232
Efr3b	3.156e-14	2.631e-13	9.4049	9.5459	9.2068	9.3615	9.088	0	0	0	0	0		9.32142
Hectd4	3.566e-16	9.701e-15	9.1702	9.4049	9.3106	9.4214	9.2842	0	0	0	0	0		9.31826
Nptx2	2.586e-16	7.901e-15	9.2425	9.4252	9.3964	9.3278	9.197	0	0	0	0	0		9.31778
Exoc6b	1.239e-15	2.365e-14	9.2951	9.4619	9.2031	9.4166	9.2075	0	0	0	0	0		9.31684
Cherp	2.665e-17	1.619e-15	9.3115	9.3996	9.3809	9.2489	9.2396	0	0	0	0	0		9.3161
Dnm1l	4.013e-11	9.266e-11	13.515	13.522	13.584	13.536	13.968	4.2854	4.3363	3.6781	4.6893	4.5607		9.31504
Evi5l	2.492e-13	1.389e-12	9.2987	9.5921	9.4233	9.296	8.9643	0	0	0	0	0		9.31488
Ccsap	1.36e-11	3.766e-11	9.8591	9.0909	9.0575	8.9875	9.5542	0	0	0	0	0		9.30984
Carm1	6.646e-13	3.036e-12	9.113	9.2503	9.2477	9.1712	9.763	0	0	0	0	0		9.30904
NOGENE	7.163e-17	3.17e-15	9.1901	9.3992	9.2628	9.3635	9.3231	0	0	0	0	0		9.30774
Rab11fip2	2.55e-14	2.184e-13	9.4269	9.4623	9.2441	9.3452	9.0315	0	0	0	0	0		9.302
Prkcd	1.009e-13	6.703e-13	9.4235	9.5736	9.2099	9.2557	9.0384	0	0	0	0	0		9.30022
Triap1	1.653e-13	9.895e-13	9.6359	9.3859	9.2247	9.1747	9.0782	0	0	0	0	0		9.29988
Arpp21	6.85e-12	2.108e-11	9.7124	9.299	8.7609	9.2687	9.4514	0	0	0	0	0		9.29848
Gopc	6.616e-10	1.07e-09	9.0983	9.8553	9.4941	9.712	8.3161	0	0	0	0	0		9.29516
Lamp1	6.295e-15	7.648e-14	9.3061	9.1257	9.3354	9.1989	9.506	0	0	0	0	0		9.29442
Chm	8.518e-15	9.478e-14	9.079	9.2339	9.3376	9.3183	9.4898	0	0	0	0	0		9.29172
Dip2b	3.073e-14	2.578e-13	9.3188	9.5586	9.2055	9.2815	9.0784	0	0	0	0	0		9.28856
Timm8b	3.343e-09	4.673e-09	9.7342	9.8572	9.1933	9.6352	8.009	0	0	0	0	0		9.28578
Mtch1	4.317e-11	9.828e-11	9.5461	8.853	9.0334	9.0639	9.9168	0	0	0	0	0		9.28264
Copg1	3.601e-16	9.711e-15	9.2579	9.372	9.1171	9.2873	9.3538	0	0	0	0	0		9.27762
Olfm2	1.053e-15	2.092e-14	9.4584	9.2877	9.1523	9.2642	9.2073	0	0	0	0	0		9.27398
Ogfr	1.295e-09	1.969e-09	9.9007	8.7512	8.8542	8.7462	10.095	0	0	0	0	0		9.26946
Cdk16	6.117e-14	4.566e-13	9.0067	9.3356	9.524	9.2912	9.1739	0	0	0	0	0		9.26628
Eno3	3.439e-15	4.993e-14	9.3421	9.209	9.4559	9.1816	9.1259	0	0	0	0	0		9.2629
Sik3	5.326e-13	2.557e-12	9.0466	9.1515	9.1918	9.2267	9.6966	0	0	0	0	0		9.26264
Zfyve1	6.619e-16	1.527e-14	9.3332	9.3219	9.2167	9.332	9.0829	0	0	0	0	0		9.25734
Myl6b	7.551e-13	3.356e-12	9.1213	9.502	9.2946	9.4854	8.8771	0	0	0	0	0		9.25608
Apba1	5.302e-14	4.037e-13	9.3737	9.4467	9.0715	9.3456	9.0326	0	0	0	0	0		9.25402
Exoc3	6.17e-16	1.443e-14	9.0618	9.3325	9.2766	9.2951	9.2919	0	0	0	0	0		9.25158
Dtna	5.059e-13	2.455e-12	9.1561	9.5459	9.3661	9.296	8.879	0	0	0	0	0		9.24862
Arhgef12	4.887e-16	1.222e-14	9.271	9.3407	9.1782	9.3222	9.0912	0	0	0	0	0		9.24066
Rab3gap1	8.199e-17	3.494e-15	9.2348	9.3302	9.1038	9.2619	9.2701	0	0	0	0	0		9.24016
Gak	7.234e-07	8.131e-07	10.319	10.583	10.299	10.383	9.9674	2.406	0	0	2.9449	0		9.2401
Bcr	3.215e-13	1.714e-12	9.1419	9.1469	9.1584	9.0872	9.6573	0	0	0	0	0		9.23834
Trove2	5.704e-13	2.699e-12	8.7863	9.3531	9.3633	9.3092	9.3744	0	0	0	0	0		9.23726
Fam213b	3.556e-15	5.107e-14	9.2822	9.2842	9.3231	9.284	8.9958	0	0	0	0	0		9.23386
Rp2	3.581e-17	1.997e-15	9.3151	9.2967	9.2363	9.1459	9.1667	0	0	0	0	0		9.23214
Mrpl1	9.374e-13	3.97e-12	9.2951	9.4862	9.2206	9.3722	8.7827	0	0	0	0	0		9.23136
Slc25a18	1.365e-14	1.361e-13	9.2951	9.1283	9.1447	9.1062	9.4822	0	0	0	0	0		9.2313
Rps15	2.026e-16	6.777e-15	9.2914	9.3192	9.1413	9.2731	9.1127	0	0	0	0	0		9.22754
Aplp2	2.325e-12	8.461e-12	9.5415	9.3815	9.1579	9.3058	8.7472	0	0	0	0	0		9.22678
Arpc1b	2.349e-13	1.32e-12	9.231	9.4705	9.2472	9.3249	8.8586	0	0	0	0	0		9.22644
Efnb2	8.947e-14	6.157e-13	8.8848	9.3163	9.39	9.321	9.2031	0	0	0	0	0		9.22304
Tra2b	1.906e-10	3.585e-10	10.114	9.2095	8.8626	9.1017	8.824	0	0	0	0	0		9.22236
Mt1	1.234e-09	1.882e-09	9.2766	9.698	9.6422	9.4174	8.0768	0	0	0	0	0		9.2222
Gnpda1	9.371e-15	1.011e-13	8.9635	9.3001	9.275	9.3476	9.2182	0	0	0	0	0		9.22088
Hsdl2	8.358e-14	5.864e-13	9.3509	9.3345	9.2336	9.302	8.8722	0	0	0	0	0		9.21864
Ctps1	1.414e-13	8.686e-13	9.2406	9.4157	9.2389	9.3354	8.8623	0	0	0	0	0		9.21858
Mtmr9	4.201e-14	3.362e-13	9.0179	9.0824	9.3185	9.1604	9.4658	0	0	0	0	0		9.209
Gns	2.602e-12	9.269e-12	9.0157	9.4913	9.2882	9.4527	8.7731	0	0	0	0	0		9.2042
Ttc19	3.849e-14	3.13e-13	8.9018	9.2694	9.3309	9.3334	9.1679	0	0	0	0	0		9.20068
Rpl37a	6.765e-12	2.085e-11	9.7797	9.1401	9.1814	8.9443	8.9408	0	0	0	0	0		9.19726
Ncam1	1.53e-11	4.168e-11	12.623	12.734	13.096	12.953	13.083	3.3646	4.1293	3.4195	3.848	3.7549		9.19454
Tiam2	1.795e-15	3.111e-14	9.196	9.1357	9.1283	9.0996	9.4028	0	0	0	0	0		9.19248
Ryden	4.739e-18	5.111e-16	9.2654	9.1401	9.2415	9.1609	9.1462	0	0	0	0	0		9.19082
Jakmip1	1.146e-11	3.255e-11	9.3349	9.4878	9.275	9.301	8.5504	0	0	0	0	0		9.18982
Mtmr1	5.87e-16	1.404e-14	9.0661	9.2339	9.3122	9.2422	9.0875	0	0	0	0	0		9.18838
Dek	4.141e-13	2.092e-12	9.5415	9.2444	9.1413	9.1416	8.8688	0	0	0	0	0		9.18752
Zbtb8os	1.017e-10	2.058e-10	10.018	9.0243	9.1441	8.9632	8.7853	0	0	0	0	0		9.18698
Mbnl2	7.202e-13	3.237e-12	9.3562	9.3837	9.1624	9.2708	8.7465	0	0	0	0	0		9.18392
Fam171b	3.003e-14	2.528e-13	8.9018	9.3047	9.321	9.2543	9.1249	0	0	0	0	0		9.18134
Lrrc73	7.263e-13	3.258e-12	9.4617	9.3047	9.2068	9.1594	8.7639	0	0	0	0	0		9.1793
Pkp4	1.909e-13	1.106e-12	8.8019	9.2427	9.3661	9.2836	9.2007	0	0	0	0	0		9.179
Gprin3	9.478e-14	6.423e-13	9.1398	9.3554	9.2564	9.2836	8.8442	0	0	0	0	0		9.17588
Rab21	2.755e-13	1.517e-12	9.1702	9.0922	9.1667	8.8969	9.5308	0	0	0	0	0		9.17136
Lysmd2	2.382e-10	4.329e-10	9.614	9.5078	9.1982	9.274	8.2616	0	0	0	0	0		9.17112
Apool	8.588e-16	1.86e-14	9.0704	9.0883	9.2283	9.1303	9.3381	0	0	0	0	0		9.17108
Sap18	1.917e-11	5.01e-11	9.6944	9.1378	9.1324	9.2845	8.6047	0	0	0	0	0		9.17076
Ptrhd1	5.157e-15	6.697e-14	9.0682	9.2955	9.1906	9.3058	8.9884	0	0	0	0	0		9.1697
Arfgap2	1.802e-13	1.056e-12	9.1621	9.3063	9.2586	9.3231	8.7964	0	0	0	0	0		9.1693
Tdrkh	2.76e-12	9.726e-12	8.9588	9.4386	9.3401	9.3597	8.7303	0	0	0	0	0		9.1655
Ppm1g	1.865e-13	1.087e-12	8.8199	9.2422	9.388	9.2691	9.0928	0	0	0	0	0		9.1624
Trappc8	1.539e-16	5.496e-15	9.0135	9.2303	9.1992	9.138	9.2223	0	0	0	0	0		9.16066
Dis3l2	3.002e-18	3.695e-16	9.1662	9.2286	9.1205	9.0888	9.1866	0	0	0	0	0		9.15814
Bag6	1.901e-13	1.104e-12	9.0575	9.3938	9.1568	9.3287	8.8471	0	0	0	0	0		9.15678
Rbm39	7.308e-16	1.643e-14	9.3385	9.1631	9.1267	9.0537	9.1012	0	0	0	0	0		9.15664
Strip1	4.028e-17	2.108e-15	9.2233	9.1344	9.0395	9.1546	9.223	0	0	0	0	0		9.15496
P33monox	1.203e-11	3.388e-11	9.198	9.3565	9.358	9.3536	8.5086	0	0	0	0	0		9.15494
Ryr2	8.075e-07	9.053e-07	11.721	11.564	11.494	11.502	11.779	2.406	3.433	2.6088	0	3.848		9.15284
Smc3	7.684e-12	2.321e-11	9.115	9.4527	9.2031	9.4	8.5801	0	0	0	0	0		9.15018
Eif4a2	1.795e-10	3.396e-10	12.455	12.079	12.142	12.095	12.941	3.7115	3.263	3.2928	2.8278	2.8679		9.1498
Mrpl53	2.425e-08	3.009e-08	10.66	9.3296	9.0262	8.5943	8.1349	0	0	0	0	0		9.149
Ahnak	1.257e-13	8.006e-13	9.4973	9.1244	8.9443	9.0699	9.1004	0	0	0	0	0		9.14726
Gzmg	1.699e-08	2.135e-08	10.282	9.3558	9.0073	9.3058	7.7442	0	0	0	0	0		9.13902
Luc7l2	2.788e-16	8.325e-15	9.1722	9.2281	9.0537	9.1874	9.0006	0	0	0	0	0		9.1284
Ncoa7	6.179e-14	4.599e-13	9.0531	9.2538	9.218	9.2829	8.8278	0	0	0	0	0		9.12712
Pdk1	2.199e-13	1.25e-12	9.0531	9.3345	9.2432	9.2121	8.7692	0	0	0	0	0		9.12242
Rab39b	2.23e-14	1.971e-13	8.83	9.2257	9.1965	9.2184	9.1401	0	0	0	0	0		9.12214
Larp1	2.558e-13	1.421e-12	9.1088	9.0359	8.8605	9.0906	9.4794	0	0	0	0	0		9.11504
Acsl5	1.64e-14	1.562e-13	9.1682	9.2842	9.1075	9.1518	8.8505	0	0	0	0	0		9.11244
Gtf2f2	1.298e-11	3.611e-11	9.3947	9.3558	9.1163	9.2065	8.4814	0	0	0	0	0		9.11094
Ocrl	1.933e-15	3.275e-14	8.9588	9.0539	9.1485	9.0983	9.2905	0	0	0	0	0		9.11
Prmt8	6.533e-12	2.023e-11	9.115	8.8969	8.9568	8.8814	9.6917	0	0	0	0	0		9.10836
Abhd6	8.725e-13	3.758e-12	8.9977	9.0008	8.9111	9.0572	9.5689	0	0	0	0	0		9.10714
Amigo1	6.491e-16	1.511e-14	9.2766	9.1117	9.0129	9.0176	9.0938	0	0	0	0	0		9.10252
Hebp1	2.77e-15	4.207e-14	9.1722	8.9884	9.2534	9.1439	8.9495	0	0	0	0	0		9.10148
Actl6b	5.402e-15	6.869e-14	9.1192	9.3086	9.0079	9.1122	8.9416	0	0	0	0	0		9.0979
Tomm40l	1.812e-15	3.113e-14	8.9955	9.0707	9.0901	9.0265	9.3045	0	0	0	0	0		9.09746
Scn1b	3.807e-14	3.11e-13	8.781	9.2102	9.1573	9.1556	9.1789	0	0	0	0	0		9.0966
Pdxp	9.215e-12	2.707e-11	9.284	9.3639	9.0556	9.2801	8.4986	0	0	0	0	0		9.09644
Ptpn23	1.776e-12	6.853e-12	9.0135	9.317	9.1933	9.3201	8.6319	0	0	0	0	0		9.09516
Eif3b	6.808e-14	4.949e-13	9.0983	9.2619	9.2082	9.1017	8.7702	0	0	0	0	0		9.08806
Coa3	5.078e-12	1.63e-11	9.1213	9.4132	8.9801	9.3273	8.5846	0	0	0	0	0		9.0853
Cntfr	5.761e-12	1.805e-11	8.9069	8.7398	9.1955	8.9687	9.6008	0	0	0	0	0		9.08234
Lcmt1	5.744e-13	2.71e-12	9.0157	8.8924	9.0073	8.9753	9.5192	0	0	0	0	0		9.08198
Chmp2a	2.294e-11	5.8e-11	9.1337	9.4365	9.1475	9.2824	8.409	0	0	0	0	0		9.08182
Mug1	1.915e-18	3.175e-16	9.0466	9.1109	9.0067	9.1127	9.1252	0	0	0	0	0		9.08042
Cdk17	2.376e-14	2.072e-13	9.2747	9.0276	9.1918	9.0469	8.8398	0	0	0	0	0		9.07616
C3	3.443e-16	9.624e-15	9.0157	9.04	9.2252	9.1166	8.9764	0	0	0	0	0		9.07478
Ssrp1	9.254e-17	3.821e-15	8.9565	9.1046	9.1352	9.0196	9.1548	0	0	0	0	0		9.07414
Acss2	2.15e-15	3.518e-14	9.0466	9.1631	9.0165	9.2226	8.909	0	0	0	0	0		9.07156
Cdh11	1.15e-11	3.261e-11	9.1337	9.3865	9.1814	9.2029	8.445	0	0	0	0	0		9.0699
Prpf40a	1.471e-17	1.073e-15	8.9681	9.0792	9.0946	9.1487	9.0528	0	0	0	0	0		9.06868
Tbce	7.244e-14	5.223e-13	9.1213	9.2119	9.0779	9.1841	8.7357	0	0	0	0	0		9.06618
Flii	3.377e-16	9.495e-15	9.1722	9.0447	8.9784	8.9698	9.1652	0	0	0	0	0		9.06606
Tnpo2	2.45e-13	1.369e-12	8.7276	8.9946	9.1712	9.1101	9.3258	0	0	0	0	0		9.06586
Cope	5.573e-14	4.219e-13	8.8799	9.2213	9.1462	9.23	8.8514	0	0	0	0	0		9.06576
Agl	3.896e-17	2.059e-15	9.0811	9.1792	8.9813	9.0447	9.0224	0	0	0	0	0		9.06174
Pdpr	1.492e-17	1.073e-15	8.9704	9.1083	9.0282	9.139	9.0542	0	0	0	0	0		9.06002
Wdr5	3.41e-11	8.099e-11	9.2425	9.2595	9.1864	9.2731	8.3165	0	0	0	0	0		9.0556
Diaph1	4.943e-15	6.459e-14	8.8799	8.9687	9.0575	9.1017	9.242	0	0	0	0	0		9.04996
Vps18	9.609e-19	1.962e-16	9.0877	9.1051	8.9927	9.0469	9.0168	0	0	0	0	0		9.04984
Uchl5	1.338e-12	5.378e-12	8.9887	9.3498	9.0287	9.2453	8.6344	0	0	0	0	0		9.04938
Slc30a1	4.293e-11	9.783e-11	9.0877	8.734	8.8467	8.7964	9.771	0	0	0	0	0		9.04716
Lsm14b	1.078e-11	3.096e-11	9.0135	9.3498	9.1176	9.299	8.4533	0	0	0	0	0		9.04664
Tsc1	2.301e-11	5.81e-11	9.7328	8.9006	8.9626	8.7289	8.9018	0	0	0	0	0		9.04534
Uba6	4.695e-17	2.341e-15	8.9955	9.1122	9.0537	8.9331	9.108	0	0	0	0	0		9.0405
Ccar1	1.284e-14	1.295e-13	9.2932	8.987	8.8765	9.0185	9.0081	0	0	0	0	0		9.03666
Kit	5.922e-16	1.404e-14	9.1601	9.0312	9.0755	9.0381	8.8716	0	0	0	0	0		9.0353
Arl15	1.524e-14	1.472e-13	8.9141	9.2764	9.0171	9.0821	8.8808	0	0	0	0	0		9.0341
Psme3	1.376e-16	5.156e-15	9.1662	9.0752	8.9813	8.9779	8.9597	0	0	0	0	0		9.03206
Slc1a4	1.246e-09	1.898e-09	9.4269	8.6959	8.4615	8.5872	9.9781	0	0	0	0	0		9.02992
Nbea	3.335e-07	3.807e-07	11.117	11.291	11.106	11.162	11.151	3.4195	2.7442	1.848	0	2.6781		9.02744
Creb1	2.465e-15	3.889e-14	9.0661	8.9293	9.1254	9.1503	8.8633	0	0	0	0	0		9.02688
Rcn1	3.392e-13	1.778e-12	9.0704	9.2398	9.0268	9.1518	8.6366	0	0	0	0	0		9.02508
Ankfy1	2.281e-16	7.395e-15	8.991	8.9878	9.1075	8.906	9.1306	0	0	0	0	0		9.02458
Rrp7a	1.471e-11	4.024e-11	9.2914	8.6021	9.2148	8.6424	9.3722	0	0	0	0	0		9.02458
Ociad1	3.368e-11	8.015e-11	9.2329	8.8173	8.8151	8.6107	9.6399	0	0	0	0	0		9.02318
Ublcp1	1.271e-13	8.056e-13	9.0356	9.1644	9.1254	9.1239	8.666	0	0	0	0	0		9.02306
Gdap1l1	1.284e-12	5.186e-12	9.46	8.951	8.732	8.8939	9.0717	0	0	0	0	0		9.02172
Rpl15	4.184e-12	1.379e-11	8.5353	9.068	9.4229	9.0771	9.0031	0	0	0	0	0		9.02128
Gnpda2	1.648e-15	2.933e-14	9.0725	9.0928	9.0545	9.0755	8.8093	0	0	0	0	0		9.02092
Arpin	2.302e-16	7.417e-15	9.1581	9.0084	8.9352	8.9387	9.061	0	0	0	0	0		9.02028
Rab9	3.892e-13	1.997e-12	8.7967	9.2114	9.1244	9.2271	8.7337	0	0	0	0	0		9.01866
Chmp1b2	4.138e-11	9.5e-11	9.7082	9.0073	8.8455	8.9681	8.5634	0	0	0	0	0		9.0185
Ralgapa1	5.304e-11	1.169e-10	9.7797	8.973	8.7418	8.7784	8.8057	0	0	0	0	0		9.01572
Oxsr1	5.904e-18	6e-16	9	9.0599	9.0566	9.0011	8.915	0	0	0	0	0		9.00652
Mtx3	3.742e-16	1.004e-14	8.8626	9.1051	8.9513	9.0318	9.0765	0	0	0	0	0		9.00546
Glyr1	5.619e-11	1.23e-10	8.9449	9.3608	9.1004	9.3054	8.2705	0	0	0	0	0		8.9964
Pick1	3.068e-13	1.649e-12	8.9093	8.8918	8.9346	8.8442	9.4	0	0	0	0	0		8.99598
Brsk2	5.019e-13	2.442e-12	8.6914	9.0547	8.9504	8.9153	9.3578	0	0	0	0	0		8.99392
Golga3	7.088e-13	3.202e-12	9.0224	9.1571	9.0262	9.1972	8.5615	0	0	0	0	0		8.99288
Fn3k	2.122e-14	1.889e-13	8.7357	8.9393	9.0983	9.0318	9.1515	0	0	0	0	0		8.99132
Mrpl58	1.053e-14	1.106e-13	8.9796	9.1447	9.097	8.9736	8.7579	0	0	0	0	0		8.99056
Apc	2.044e-12	7.627e-12	9.2747	9.0856	9.0213	9.0669	8.5026	0	0	0	0	0		8.99022
Nudt16	5.987e-11	1.297e-10	8.7784	9.3698	9.1606	9.3206	8.3174	0	0	0	0	0		8.98936
Cntn4	1.752e-14	1.641e-13	8.8199	9.1439	9.1372	9.0137	8.8262	0	0	0	0	0		8.98818
Daam1	2.844e-15	4.296e-14	9.1821	9.0201	8.8542	8.8997	8.983	0	0	0	0	0		8.98782
Slc4a8	9.427e-13	3.986e-12	9.1233	9.2269	9.0268	9.0107	8.543	0	0	0	0	0		8.98614
Arhgdib	7.496e-15	8.65e-14	8.8552	9.1179	8.9498	9.1464	8.8427	0	0	0	0	0		8.9824
Csnk1g3	6.236e-14	4.635e-13	8.9819	8.9021	8.8753	8.8269	9.2944	0	0	0	0	0		8.97612
Sdk2	1.39e-13	8.634e-13	8.8427	9.2257	8.9932	9.1072	8.7067	0	0	0	0	0		8.9751
Slc2a3	6.464e-10	1.049e-09	9.1841	8.614	8.6554	8.4939	9.9264	0	0	0	0	0		8.97476
Cpne5	2.533e-12	9.058e-12	9.0531	8.7153	8.8691	8.7784	9.4529	0	0	0	0	0		8.97376
Mrps31	3.758e-15	5.353e-14	9.0444	8.9212	9.149	8.909	8.8112	0	0	0	0	0		8.96696
Pcbd2	3.297e-12	1.128e-11	8.9018	9.2456	9.058	9.1556	8.4676	0	0	0	0	0		8.96572
Commd6	2.364e-10	4.3e-10	9.4469	9.2351	8.941	9.1127	8.0891	0	0	0	0	0		8.96496
Acsl4	1.859e-12	7.074e-12	9.15	8.8842	8.6724	8.7432	9.3512	0	0	0	0	0		8.9602
Plch2	2.123e-14	1.889e-13	8.9612	8.8623	8.8645	8.8673	9.2406	0	0	0	0	0		8.95918
Rabgap1l	9.685e-13	4.075e-12	8.7519	9.1812	9.093	9.1518	8.601	0	0	0	0	0		8.95578
Tmco1	1.631e-09	2.417e-09	10.028	8.6014	8.5573	8.4141	9.1767	0	0	0	0	0		8.9555
Atg7	1.907e-17	1.276e-15	8.9042	9.0023	9.0455	8.8975	8.9105	0	0	0	0	0		8.952
Plbd2	1.304e-17	9.707e-16	8.9402	8.9313	9.0268	8.9977	8.8602	0	0	0	0	0		8.95124
Rpap3	3.88e-11	9.009e-11	8.9932	9.3483	8.9944	9.1609	8.2527	0	0	0	0	0		8.9499
Vps16	5.527e-15	6.955e-14	8.8676	8.9681	8.8288	8.8848	9.1724	0	0	0	0	0		8.94434
Dr1	4.365e-15	5.939e-14	8.9378	9.0922	9.0109	8.9399	8.733	0	0	0	0	0		8.94276
NOGENE	4.791e-16	1.206e-14	8.9704	8.9539	8.8461	9.0912	8.8499	0	0	0	0	0		8.9423
Snx30	6.533e-13	3.005e-12	8.8725	9.2138	8.9853	9.068	8.5519	0	0	0	0	0		8.9383
Rpn2	2.07e-07	2.391e-07	10.229	9.7289	9.539	9.6142	9.8895	0	0	1.8875	0	2.433		8.93602
Sugp2	1.981e-15	3.323e-14	8.975	9.0949	8.8323	8.941	8.7908	0	0	0	0	0		8.9268
Hnrnpul1	1.136e-11	3.238e-11	9.5399	8.706	8.7425	8.7074	8.9355	0	0	0	0	0		8.92626
Gm20503	3.324e-13	1.751e-12	9.0941	9.1012	8.842	9.0176	8.5588	0	0	0	0	0		8.92274
Abcf2	9.579e-17	3.903e-15	8.8994	8.9524	8.8262	8.8814	9.0444	0	0	0	0	0		8.92076
Adgrb3	6.078e-16	1.434e-14	8.7993	8.8975	8.8887	8.9204	9.0848	0	0	0	0	0		8.91814
Ssr1	3.325e-13	1.751e-12	9.1213	8.6286	8.7967	8.8467	9.1712	0	0	0	0	0		8.9129
Nufip2	3.846e-14	3.13e-13	9.2019	8.9108	8.7781	8.8988	8.7725	0	0	0	0	0		8.91242
Zmpste24	4.469e-18	4.989e-16	8.825	8.9192	8.9524	8.9643	8.8869	0	0	0	0	0		8.90956
Pfas	2.564e-16	7.901e-15	8.9704	9.0229	8.8262	8.8038	8.9114	0	0	0	0	0		8.90694
Gfm1	8.377e-14	5.864e-13	8.9519	9.0438	8.9975	8.9638	8.5672	0	0	0	0	0		8.90484
Mlf2	7.473e-12	2.271e-11	9.2635	9.1244	8.7787	8.9609	8.3966	0	0	0	0	0		8.90482
Taok2	1.011e-13	6.703e-13	8.9635	9.0843	8.9707	8.9162	8.5664	0	0	0	0	0		8.90022
Wdfy3	3.055e-16	8.774e-15	8.7784	8.9487	9.0226	8.837	8.9039	0	0	0	0	0		8.89812
Pakap	8.051e-15	9.13e-14	8.8452	9.0079	8.9969	8.9692	8.6692	0	0	0	0	0		8.89768
Rabif	1.663e-11	4.451e-11	9.0356	9.2197	8.7715	9.1477	8.3038	0	0	0	0	0		8.89566
Eif3e	4.626e-13	2.285e-12	8.5384	9.0824	9.0585	9.0323	8.7612	0	0	0	0	0		8.89456
Gabrb2	2.441e-12	8.786e-12	9.0378	8.7629	8.5846	8.7502	9.3276	0	0	0	0	0		8.89262
Snx15	3.878e-17	2.059e-15	8.8452	9.014	8.8826	8.8514	8.8379	0	0	0	0	0		8.88622
Ccdc92	1.266e-14	1.28e-13	9.0422	8.9658	8.8351	8.9248	8.6478	0	0	0	0	0		8.88314
Rasal2	2.289e-14	2.016e-13	8.9635	8.9941	8.6363	8.7964	9.0207	0	0	0	0	0		8.8822
Otud6b	3.745e-13	1.937e-12	9.1702	8.9864	8.6195	8.9614	8.6714	0	0	0	0	0		8.88178
Arhgef11	2.304e-12	8.408e-12	9.1439	9.0999	8.8787	8.8673	8.4128	0	0	0	0	0		8.88052
Hip1	1.042e-15	2.077e-14	8.8701	9.0031	8.9099	8.9072	8.7008	0	0	0	0	0		8.87822
Akr1b10	1.648e-11	4.419e-11	9.1802	9.0479	9.0025	8.9224	8.2355	0	0	0	0	0		8.8777
Coq6	3.702e-12	1.247e-11	8.9402	9.0843	8.9932	9.0296	8.334	0	0	0	0	0		8.87626
Sra1	3.723e-13	1.927e-12	9.0747	9.058	8.7572	8.9522	8.529	0	0	0	0	0		8.87422
Nop56	2.279e-14	2.011e-13	8.7384	8.9102	8.7357	8.8408	9.1306	0	0	0	0	0		8.87114
Pik3r4	2.199e-16	7.232e-15	9.0135	8.8022	8.7823	8.8842	8.8664	0	0	0	0	0		8.86972
Rbm33	2.218e-10	4.077e-10	8.7194	9.4292	8.5977	9.3556	8.2307	0	0	0	0	0		8.86652
Pdlim1	3.375e-13	1.771e-12	9.0312	9.0909	8.614	8.9539	8.625	0	0	0	0	0		8.863
Tenm2	1.201e-15	2.317e-14	8.7276	9.0326	8.8679	8.879	8.807	0	0	0	0	0		8.86282
Asl	9.318e-18	7.799e-16	8.7837	8.9495	8.8398	8.8483	8.8848	0	0	0	0	0		8.86122
Fam192a	2.08e-11	5.352e-11	8.7705	9.1357	9.1205	9.0386	8.2298	0	0	0	0	0		8.85902
Vmn2r3	2.381e-08	2.957e-08	8.3945	9.8935	8.7306	9.6411	7.6308	0	0	0	0	0		8.8581
Kcna1	5.873e-16	1.404e-14	8.6858	8.9072	8.8449	8.906	8.946	0	0	0	0	0		8.85798
Elavl2	6.677e-10	1.079e-09	12.585	12.588	12.735	12.747	12.549	3.3074	4.278	3.511	3.2928	4.5361		8.85574
Ralgapa1	1.25e-10	2.471e-10	9.6958	8.7112	8.5622	8.5838	8.7039	0	0	0	0	0		8.85138
Plekha5	9.158e-15	9.938e-14	9.0356	8.9293	8.8617	8.6621	8.7625	0	0	0	0	0		8.85024
Znf512	3.263e-21	5.749e-18	8.8199	8.8281	8.8753	8.8496	8.8564	0	0	0	0	0		8.84586
Ppm1b	1.802e-13	1.056e-12	8.807	9.0819	8.733	9.0238	8.5725	0	0	0	0	0		8.84364
Fnbp1l	9.807e-13	4.123e-12	9.2822	8.7781	8.7438	8.6007	8.7837	0	0	0	0	0		8.8377
Cstf2	3.482e-11	8.248e-11	9.0962	9.1916	8.6997	9.0037	8.1903	0	0	0	0	0		8.8363
Rimbp2	1.672e-11	4.467e-11	9.0201	9.0798	8.8701	9.0101	8.1864	0	0	0	0	0		8.8333
Cds1	2.217e-16	7.232e-15	8.7465	8.9695	8.8135	8.7622	8.8701	0	0	0	0	0		8.83236
Tsr2	1.008e-07	1.192e-07	10.745	8.1639	8.2531	8.1467	8.8373	0	0	0	0	0		8.8292
Gc	1.526e-12	6.033e-12	8.6546	8.9884	8.9912	9.0731	8.4313	0	0	0	0	0		8.82772
C530008M17Rik	1.543e-11	4.196e-11	8.9932	9.0196	8.8894	9.0375	8.1774	0	0	0	0	0		8.82342
Rars	1.609e-07	1.876e-07	10.61	10.593	10.699	10.642	11.012	2.1375	2.0704	2.0356	0	3.2016		8.82218
Apbb1	7.419e-11	1.558e-10	8.9519	9.1331	8.8933	9.0795	8.0428	0	0	0	0	0		8.82012
Prkag2	8.729e-14	6.046e-13	9.0983	8.7323	8.6195	8.7218	8.9263	0	0	0	0	0		8.81964
Ca1	1.307e-11	3.633e-11	8.9402	9.0739	8.9144	8.9718	8.1864	0	0	0	0	0		8.81734
Ipcef1	2.537e-18	3.398e-16	8.8602	8.8281	8.8408	8.7276	8.7964	0	0	0	0	0		8.81062
Iqsec3	1.049e-13	6.897e-13	8.6315	9.0626	8.8474	8.909	8.5958	0	0	0	0	0		8.80926
Tagln	7.565e-15	8.708e-14	8.6858	8.8903	8.7187	9.0137	8.7238	0	0	0	0	0		8.80646
Prcc	2.176e-11	5.548e-11	8.7915	9.1737	8.9012	8.9924	8.1724	0	0	0	0	0		8.80624
Ap3s2	1.424e-16	5.297e-15	8.7625	8.9337	8.7902	8.8335	8.7053	0	0	0	0	0		8.80504
Sema4d	5.629e-13	2.67e-12	9.192	8.7529	8.7211	8.5357	8.8199	0	0	0	0	0		8.80432
Tns1	5.174e-13	2.497e-12	9.0488	8.9307	8.7787	8.8316	8.4166	0	0	0	0	0		8.80128
Hsd17b11	1.754e-13	1.035e-12	8.7705	8.7912	8.6847	8.5999	9.1452	0	0	0	0	0		8.7983
Lrp1b	1.106e-15	2.176e-14	8.8577	8.7781	8.7738	8.6417	8.939	0	0	0	0	0		8.79806
Thtpa	5.823e-10	9.557e-10	8.8401	9.2303	9.0025	9.115	7.8022	0	0	0	0	0		8.79802
Reep1	3.665e-10	6.322e-10	9.6733	8.4153	8.4434	8.4741	8.9821	0	0	0	0	0		8.79764
Gpm6b	3.412e-08	4.185e-08	9.231	7.9819	8.5634	7.9617	10.244	0	0	0	0	0		8.7964
Dhx30	1.169e-16	4.509e-15	8.7056	8.8237	8.8894	8.8508	8.7118	0	0	0	0	0		8.79626
Atp9a	1.044e-12	4.335e-12	8.7519	9.1012	8.7249	8.9626	8.4183	0	0	0	0	0		8.79178
Prkg2	1.284e-12	5.186e-12	8.4814	8.9878	8.9428	9.0249	8.5216	0	0	0	0	0		8.7917
Grm1	1.232e-14	1.249e-13	8.5902	8.8367	8.718	8.8202	8.9921	0	0	0	0	0		8.79144
Tmed7	4.034e-16	1.056e-14	8.6489	8.8109	8.8542	8.7384	8.8936	0	0	0	0	0		8.7892
Gm20671	3.085e-16	8.814e-15	8.8651	8.8598	8.7549	8.6402	8.825	0	0	0	0	0		8.789
Bmpr2	4.648e-14	3.628e-13	8.6546	8.9021	8.9881	8.8329	8.5619	0	0	0	0	0		8.78792
Atp5j2	5.363e-15	6.846e-14	9.0179	8.7204	8.6816	8.7283	8.7882	0	0	0	0	0		8.78728
Pitpnm2	6.429e-14	4.726e-13	8.7001	9.0672	8.6044	8.8691	8.6956	0	0	0	0	0		8.78728
Pak6	1.238e-17	9.392e-16	8.7572	8.8945	8.7448	8.7495	8.7728	0	0	0	0	0		8.78376
Slc7a14	1.84e-11	4.859e-11	8.4216	8.6596	8.6449	8.784	9.4066	0	0	0	0	0		8.78334
Wnk1	2.176e-12	8.025e-12	8.6604	9.0493	8.7859	9.0452	8.3711	0	0	0	0	0		8.78238
Slc23a2	4.099e-13	2.076e-12	8.5102	8.7602	8.9684	8.6099	9.0556	0	0	0	0	0		8.78086
Ndufb1	1.616e-11	4.354e-11	8.6228	9.1652	8.538	9.1784	8.3987	0	0	0	0	0		8.78062
Serpine2	7.882e-14	5.576e-13	8.8994	8.9036	8.618	8.9372	8.5333	0	0	0	0	0		8.7783
Psmd8	1.49e-11	4.073e-11	9.3807	8.8054	8.6607	8.6084	8.4342	0	0	0	0	0		8.77788
Mtfp1	9.918e-10	1.545e-09	8.3945	9.3147	8.9443	9.3192	7.9123	0	0	0	0	0		8.777
Cxadr	1.785e-13	1.05e-12	8.683	8.9539	8.8517	8.9355	8.457	0	0	0	0	0		8.77622
Nsg1	2.455e-14	2.127e-13	8.5477	8.9057	8.9117	8.8508	8.6643	0	0	0	0	0		8.77604
Map9	6.793e-15	8.014e-14	8.8725	8.9652	8.6784	8.7231	8.6381	0	0	0	0	0		8.77546
Inpp5j	5.192e-12	1.655e-11	8.9236	8.9946	8.6536	9.0218	8.2687	0	0	0	0	0		8.77246
Tgfbr2	2.143e-13	1.223e-12	8.8427	8.7529	8.637	8.5306	9.0869	0	0	0	0	0		8.77002
Sorcs2	3.008e-17	1.786e-15	8.8326	8.8189	8.6561	8.7797	8.7512	0	0	0	0	0		8.7677
Nasp	3.162e-14	2.631e-13	8.9212	8.8125	8.783	8.8335	8.4814	0	0	0	0	0		8.76632
Rundc3a	1.115e-14	1.154e-13	8.9449	8.8477	8.6575	8.5774	8.7859	0	0	0	0	0		8.76268
Erc1	3.39e-07	3.87e-07	11.282	10.886	10.673	10.877	10.599	3.0531	2.263	2.1043	0	3.0875		8.76182
Rps6ka1	8.451e-13	3.656e-12	8.9519	8.9352	8.7129	8.8489	8.3394	0	0	0	0	0		8.75766
Bcas3	3.971e-13	2.022e-12	8.6257	9.0107	8.8414	8.875	8.4284	0	0	0	0	0		8.75624
Nyap2	4.359e-11	9.889e-11	9.1233	8.9481	8.7549	8.8988	8.0553	0	0	0	0	0		8.75608
Abcf1	4.974e-12	1.599e-11	9.1398	8.5755	8.5294	8.4794	9.0539	0	0	0	0	0		8.7556
Kcna2	1.129e-15	2.194e-14	8.8897	8.8539	8.6428	8.7122	8.676	0	0	0	0	0		8.75492
Plxnd1	9.741e-14	6.55e-13	8.4652	8.8119	8.9215	8.9084	8.6568	0	0	0	0	0		8.75276
Gtpbp1	7.056e-13	3.193e-12	8.7139	9.0869	8.6931	8.8561	8.4128	0	0	0	0	0		8.75256
Erlec1	5.981e-14	4.484e-13	8.8994	8.9218	8.73	8.732	8.47	0	0	0	0	0		8.75064
Mrpl27	1.964e-12	7.395e-12	8.8725	8.951	8.7944	8.8731	8.2588	0	0	0	0	0		8.74996
Hmgn3	5.122e-09	6.938e-09	9.7625	8.1957	8.3785	8.0773	9.3329	0	0	0	0	0		8.74938
Rras2	5.488e-17	2.544e-15	8.7139	8.8682	8.7665	8.7067	8.6767	0	0	0	0	0		8.7464
Cds2	5.891e-13	2.765e-12	8.7411	9.0304	8.5054	8.9416	8.5118	0	0	0	0	0		8.74606
Asap2	1.433e-16	5.297e-15	8.614	8.7856	8.7149	8.837	8.7718	0	0	0	0	0		8.74466
Arid1b	1.41e-14	1.385e-13	8.6575	8.9343	8.7902	8.7957	8.5376	0	0	0	0	0		8.74306
Sltm	4.242e-13	2.135e-12	9.1171	8.7645	8.6125	8.5121	8.6921	0	0	0	0	0		8.73966
Pik3c3	1.607e-14	1.539e-13	8.9117	8.8243	8.614	8.7983	8.5446	0	0	0	0	0		8.73858
Epm2aip1	1.862e-18	3.175e-16	8.6575	8.7669	8.7794	8.7609	8.7238	0	0	0	0	0		8.7377
Abcb7	9.514e-14	6.438e-13	8.4814	8.7797	8.646	8.7764	9.0008	0	0	0	0	0		8.73686
Usp19	6.909e-12	2.124e-11	9.1601	8.8909	8.6914	8.6614	8.2701	0	0	0	0	0		8.73478
Rps15a	2.738e-11	6.743e-11	8.435	8.6084	8.7804	8.4607	9.3844	0	0	0	0	0		8.73378
Mgea5	2.121e-06	2.346e-06	10.436	10.422	10.459	10.338	10.837	0	2.8679	2.8679	0	3.0875		8.73374
Eml4	3.114e-17	1.829e-15	8.6402	8.8032	8.6724	8.7784	8.7546	0	0	0	0	0		8.72976
Arl8a	1.473e-07	1.722e-07	9.3042	8.5865	8.9796	8.5721	10.22	2.0704	0	0	0	0		8.7184
Ptbp1	1.788e-14	1.661e-13	8.8502	8.8189	8.7344	8.7255	8.457	0	0	0	0	0		8.7172
Upf2	2.744e-13	1.512e-12	8.8823	8.9272	8.6496	8.731	8.3794	0	0	0	0	0		8.7139
Sacm1l	1.878e-11	4.925e-11	8.4846	8.7448	8.4774	8.4998	9.3401	0	0	0	0	0		8.70934
Psmd10	2.337e-10	4.26e-10	9.3981	8.8297	8.5898	8.7411	7.9841	0	0	0	0	0		8.70856
Crocc	4.676e-13	2.301e-12	8.3349	8.8887	8.8848	8.6323	8.798	0	0	0	0	0		8.70774
Arhgap39	6.15e-13	2.86e-12	8.9212	8.9501	8.4986	8.7469	8.42	0	0	0	0	0		8.70736
Ephx1	6.99e-15	8.228e-14	8.8019	8.6319	8.6514	8.5519	8.8915	0	0	0	0	0		8.70572
Rab27b	1.428e-15	2.594e-14	8.5872	8.8093	8.7629	8.7889	8.5793	0	0	0	0	0		8.70552
Hmgn5	2.825e-09	4.011e-09	9.5228	8.1085	8.2384	8.2512	9.3968	0	0	0	0	0		8.70354
Lmtk2	1.713e-11	4.558e-11	8.6257	9.2138	8.6938	8.7846	8.1928	0	0	0	0	0		8.70214
Chp1	4.62e-09	6.309e-09	8.4749	9.4132	8.9827	9.0996	7.5251	0	0	0	0	0		8.6991
Snrk	9.171e-17	3.816e-15	8.614	8.7662	8.7931	8.6763	8.6319	0	0	0	0	0		8.6963
Eml1	3.856e-16	1.028e-14	8.7889	8.8022	8.601	8.6114	8.6728	0	0	0	0	0		8.69526
Spcs2	4.935e-11	1.097e-10	8.4619	8.4068	8.7118	8.4838	9.4111	0	0	0	0	0		8.69508
Maged1	2.212e-12	8.129e-12	8.7029	8.8281	8.9105	8.8147	8.2046	0	0	0	0	0		8.69216
Smcr8	1.868e-12	7.094e-12	8.3772	8.8691	8.8508	8.9548	8.4073	0	0	0	0	0		8.69184
Plcb4	1.938e-12	7.321e-12	8.646	9.0392	8.7269	8.7679	8.2691	0	0	0	0	0		8.68982
Gucy1a1	1.712e-13	1.014e-12	8.56	8.7505	8.4607	8.6682	8.9972	0	0	0	0	0		8.68732
Rbm10	6.639e-13	3.035e-12	8.8199	8.9117	8.641	8.7645	8.2877	0	0	0	0	0		8.68496
Dgke	6.255e-13	2.903e-12	8.4717	8.6366	8.6421	8.5714	9.0967	0	0	0	0	0		8.6837
Trappc4	9.226e-14	6.292e-13	8.6344	8.9218	8.7337	8.7269	8.4005	0	0	0	0	0		8.68346
Eif2b3	3.905e-20	2.948e-17	8.6604	8.7347	8.6717	8.6675	8.6689	0	0	0	0	0		8.68064
Dnajb6	9.246e-07	1.034e-06	11.153	11.422	11.282	11.305	10.714	3.4594	2.7004	3.263	0	3.0531		8.68002
Pon2	7.039e-12	2.16e-11	8.3633	9.0425	8.8045	8.8802	8.3088	0	0	0	0	0		8.67986
Rmdn1	2.646e-11	6.556e-11	8.7249	9.0757	8.7425	8.8173	8.0389	0	0	0	0	0		8.67986
Nipsnap3b	2.045e-15	3.398e-14	8.6632	8.4814	8.7173	8.7495	8.7771	0	0	0	0	0		8.6777
Osbp2	7.744e-13	3.422e-12	8.3061	8.9764	8.7579	8.7462	8.5999	0	0	0	0	0		8.6773
Scyl1	1.32e-13	8.29e-13	8.7357	8.9123	8.6188	8.7391	8.3755	0	0	0	0	0		8.67628
Mrpl9	4.784e-11	1.069e-10	8.8427	9.0993	8.6173	8.8074	7.9989	0	0	0	0	0		8.67312
Sdcbp	1.661e-08	2.09e-08	8.7546	9.192	9.1923	9.0639	7.1579	0	0	0	0	0		8.67214
Adgrl2	1.444e-10	2.802e-10	8.8477	9.0819	8.7381	8.799	7.8449	0	0	0	0	0		8.66232
Myl1	1.539e-10	2.962e-10	9.4235	8.6373	8.5683	8.5695	8.097	0	0	0	0	0		8.65912
Cbs	6.384e-13	2.947e-12	8.7221	8.893	8.5733	8.7784	8.2696	0	0	0	0	0		8.64728
Usp47	1.75e-11	4.65e-11	8.445	9.0215	8.7738	8.8679	8.1143	0	0	0	0	0		8.6445
Mycbp	4.653e-10	7.833e-10	9.1621	8.8805	8.588	8.8449	7.7286	0	0	0	0	0		8.64082
Ankrd28	3.902e-13	1.998e-12	8.975	8.5407	8.6977	8.3602	8.621	0	0	0	0	0		8.63892
Ptgs2	8.841e-11	1.819e-10	8.3278	8.1724	8.8304	8.5607	9.2999	0	0	0	0	0		8.63824
Preb	1.624e-10	3.106e-10	9.3439	8.7398	8.5082	8.5542	8.0123	0	0	0	0	0		8.63168
Cobl	9.089e-11	1.862e-10	8.7889	8.9117	8.7448	8.8713	7.8411	0	0	0	0	0		8.63156
Hspb1	6.95e-11	1.472e-10	8.781	8.9132	8.5584	8.9881	7.9159	0	0	0	0	0		8.63132
Dnajb12	7.579e-15	8.708e-14	8.563	8.7221	8.7225	8.7231	8.4162	0	0	0	0	0		8.62938
Gfod1	2.585e-12	9.226e-12	8.529	8.9773	8.5664	8.8288	8.2394	0	0	0	0	0		8.62818
Numa1	9.764e-16	2.006e-14	8.4878	8.7122	8.7549	8.5951	8.5891	0	0	0	0	0		8.62782
Mrrf	9.304e-15	1.006e-13	8.8602	8.6095	8.6213	8.4931	8.5419	0	0	0	0	0		8.6252
Nrxn2	1.095e-12	4.518e-12	8.6431	8.7357	8.8163	8.7502	8.1794	0	0	0	0	0		8.62494
Ces1c	8.12e-15	9.189e-14	8.8552	8.5058	8.5831	8.6363	8.5345	0	0	0	0	0		8.62298
Csmd1	5.014e-14	3.846e-13	8.5196	8.7692	8.7187	8.7296	8.3602	0	0	0	0	0		8.61946
Shoc2	9.519e-19	1.962e-16	8.5992	8.5782	8.5748	8.6286	8.6833	0	0	0	0	0		8.61282
Lsm2	4.143e-11	9.503e-11	8.2158	9.0345	8.5887	9.0101	8.2143	0	0	0	0	0		8.61268
Stk4	9.183e-12	2.701e-11	8.6257	8.9117	8.6348	8.8269	8.0547	0	0	0	0	0		8.61076
Eps15	3.258e-11	7.799e-11	8.56	9.0017	8.574	8.9105	8.0045	0	0	0	0	0		8.61014
Lamb2	8.517e-13	3.677e-12	8.4317	8.8307	8.5473	8.9048	8.3358	0	0	0	0	0		8.61006
Bag1	3.575e-11	8.435e-11	8.3349	8.9744	8.8003	8.8802	8.0526	0	0	0	0	0		8.60848
Gmppb	2.231e-12	8.17e-12	8.697	8.9096	8.5314	8.7269	8.1669	0	0	0	0	0		8.60636
Nudt18	2.467e-11	6.164e-11	9.0898	8.733	8.4994	8.6554	8.0509	0	0	0	0	0		8.6057
Dyrk1a	3.04e-14	2.554e-13	8.4013	8.7438	8.7462	8.671	8.457	0	0	0	0	0		8.60386
Ift22	9.494e-12	2.78e-11	8.7941	8.7823	8.6044	8.8135	8.0224	0	0	0	0	0		8.60334
Ppat	3.92e-12	1.306e-11	8.5812	8.7569	8.7817	8.7908	8.0843	0	0	0	0	0		8.59898
Kifap3	8.156e-15	9.21e-14	8.3807	8.6795	8.5676	8.6202	8.7448	0	0	0	0	0		8.59856
Ssbp1	1.798e-13	1.056e-12	8.7303	8.6286	8.2612	8.5752	8.7827	0	0	0	0	0		8.5956
Macrod2	3.911e-14	3.156e-13	8.8725	8.4842	8.4959	8.4818	8.6359	0	0	0	0	0		8.59406
Mia2	1.773e-14	1.65e-13	8.5782	8.8015	8.6084	8.6099	8.3716	0	0	0	0	0		8.59392
Adgrb3	4.766e-16	1.205e-14	8.4652	8.5876	8.55	8.6099	8.7317	0	0	0	0	0		8.58888
Bsdc1	4.159e-12	1.374e-11	8.6344	8.7791	8.7432	8.7132	8.0531	0	0	0	0	0		8.5846
Fdx2	1.068e-12	4.416e-12	8.6431	8.7296	8.56	8.8154	8.1594	0	0	0	0	0		8.5815
Zc3h14	2.277e-10	4.168e-10	8.1844	9.1117	8.796	8.879	7.9331	0	0	0	0	0		8.58084
Cutc	6.06e-11	1.31e-10	8.5446	8.9773	8.7142	8.781	7.8765	0	0	0	0	0		8.57872
Slc39a6	6.337e-14	4.683e-13	8.4183	8.4309	8.5748	8.6029	8.8608	0	0	0	0	0		8.57754
Fry	7.802e-14	5.541e-13	8.4483	8.5058	8.5337	8.4931	8.8994	0	0	0	0	0		8.57606
Tmem132b	8.697e-16	1.876e-14	8.6169	8.6854	8.5857	8.5865	8.4034	0	0	0	0	0		8.57558
S100a6	8.16e-12	2.439e-11	8.7837	8.2432	8.3966	8.4077	9.0408	0	0	0	0	0		8.5744
Mfap1b	1.566e-12	6.154e-12	9.0422	8.4725	8.5286	8.4085	8.4136	0	0	0	0	0		8.57308
Ipo7	1.878e-13	1.092e-12	8.2616	8.6301	8.4818	8.7245	8.7625	0	0	0	0	0		8.5721
Stx6	1.392e-14	1.378e-13	8.3527	8.5596	8.6132	8.5446	8.7632	0	0	0	0	0		8.56666
Vps11	4.231e-16	1.087e-14	8.4975	8.6699	8.5082	8.671	8.4854	0	0	0	0	0		8.5664
Hars2	5.645e-12	1.778e-11	8.6051	8.8878	8.481	8.7685	8.0779	0	0	0	0	0		8.56406
Mesd	9.011e-12	2.658e-11	8.8969	8.0773	8.5789	8.4288	8.8361	0	0	0	0	0		8.5636
Creld1	1.814e-15	3.113e-14	8.6858	8.5634	8.4022	8.6485	8.4986	0	0	0	0	0		8.5597
Pdlim5	1.839e-12	7.019e-12	8.6717	8.5902	8.7136	8.7334	8.0821	0	0	0	0	0		8.5582
Luc7l3	1.834e-16	6.302e-15	8.7056	8.5511	8.5314	8.4947	8.5038	0	0	0	0	0		8.55732
Itm2c	3.222e-13	1.715e-12	8.7652	8.5302	8.2673	8.4413	8.7794	0	0	0	0	0		8.55668
Fgg	1.215e-12	4.95e-12	8.9796	8.3349	8.6107	8.3957	8.4607	0	0	0	0	0		8.55632
Cnbp	6.12e-11	1.321e-10	8.4975	8.9687	8.55	8.8645	7.8918	0	0	0	0	0		8.5545
Serpini1	6.466e-11	1.383e-10	8.781	8.843	8.6213	8.7074	7.808	0	0	0	0	0		8.55214
Slc30a3	2.14e-11	5.475e-11	8.9955	8.4195	8.0843	8.4005	8.8505	0	0	0	0	0		8.55006
Hmbs	1.867e-14	1.716e-13	8.4516	8.6561	8.6092	8.6823	8.3228	0	0	0	0	0		8.5444
Wipi2	4.438e-13	2.211e-12	8.2951	8.7197	8.6221	8.7546	8.2932	0	0	0	0	0		8.53694
Grm2	1.813e-10	3.427e-10	8.5902	8.3287	8.1819	8.2211	9.347	0	0	0	0	0		8.53378
Prpsap2	8.986e-14	6.167e-13	8.6199	8.489	8.3138	8.4367	8.7996	0	0	0	0	0		8.5318
Ppp6c	6.858e-16	1.569e-14	8.5782	8.4814	8.3889	8.5423	8.6564	0	0	0	0	0		8.52944
Becn1	8.888e-16	1.89e-14	8.4911	8.6384	8.5706	8.5744	8.3672	0	0	0	0	0		8.52834
Itm2b	4.977e-14	3.823e-13	8.3876	8.4672	8.4124	8.5615	8.8125	0	0	0	0	0		8.52824
Cmc2	1.033e-10	2.086e-10	8.8045	8.975	8.1819	8.7367	7.9242	0	0	0	0	0		8.52446
Cacna1b	2.124e-12	7.856e-12	8.6858	8.4745	8.255	8.2798	8.9021	0	0	0	0	0		8.51944
Atp13a1	1.687e-15	2.991e-14	8.3314	8.5801	8.5664	8.6154	8.5014	0	0	0	0	0		8.51894
Bag2	4.318e-11	9.828e-11	8.4652	8.7973	8.7036	8.784	7.8405	0	0	0	0	0		8.51812
Ntng1	3.519e-15	5.067e-14	8.4684	8.3966	8.5657	8.4413	8.707	0	0	0	0	0		8.5158
Taok2	1.374e-12	5.508e-12	8.611	8.7869	8.5236	8.5519	8.0827	0	0	0	0	0		8.51122
Fam3c	1.809e-12	6.937e-12	8.4549	8.223	8.6003	8.3518	8.9251	0	0	0	0	0		8.51102
Pcyox1l	6.605e-16	1.527e-14	8.6021	8.4124	8.5286	8.3957	8.6033	0	0	0	0	0		8.50842
Pdyn	2.086e-11	5.361e-11	8.5962	8.6095	8.5789	8.8477	7.8777	0	0	0	0	0		8.502
Cops7a	4.819e-06	5.277e-06	10.141	10.509	10.548	10.525	10.258	2.9069	0	3	3.585	0		8.49782
Fam210a	9.115e-15	9.938e-14	8.425	8.5129	8.3354	8.5038	8.7105	0	0	0	0	0		8.49752
Lsm4	3.218e-11	7.716e-11	8.7194	8.7512	8.3615	8.7764	7.8759	0	0	0	0	0		8.49688
Hint3	1.711e-15	3.005e-14	8.5782	8.5302	8.3174	8.4553	8.5921	0	0	0	0	0		8.49464
Cacna1a	7.086e-15	8.311e-14	8.3633	8.7153	8.4417	8.5149	8.4375	0	0	0	0	0		8.49454
Sdc3	4.052e-11	9.323e-11	8.2914	7.971	8.6685	8.4894	9.0285	0	0	0	0	0		8.48976
Guf1	1.037e-11	2.999e-11	8.6914	8.7652	8.4846	8.5808	7.9212	0	0	0	0	0		8.48864
Asns	6.004e-13	2.81e-12	8.2541	8.4296	8.5026	8.3729	8.8725	0	0	0	0	0		8.48634
Pmm2	1.777e-13	1.047e-12	8.3242	8.5283	8.4516	8.3147	8.8074	0	0	0	0	0		8.48524
Mrpl16	4e-12	1.325e-11	8.3562	8.7438	8.5767	8.718	8.0307	0	0	0	0	0		8.48508
Wbp11	1.559e-17	1.098e-15	8.5165	8.3733	8.5185	8.5114	8.5046	0	0	0	0	0		8.48486
NOGENE	3.492e-08	4.276e-08	9.7423	8.5793	8.5192	8.4475	7.1189	0	0	0	0	0		8.48144
Ap3s1	7.242e-14	5.223e-13	8.507	8.6033	8.4923	8.621	8.1749	0	0	0	0	0		8.4797
AK157302	4.852e-11	1.08e-10	8.5228	8.8894	8.4524	8.7115	7.8208	0	0	0	0	0		8.47938
Csdc2	4.482e-10	7.584e-10	9.0378	8.6966	8.2817	8.7262	7.6482	0	0	0	0	0		8.4781
Slc16a1	1.097e-11	3.143e-11	8.5661	8.4561	8.0922	8.2877	8.9878	0	0	0	0	0		8.47798
Sfr1	9.36e-11	1.91e-10	8.4047	8.6865	8.8135	8.7166	7.732	0	0	0	0	0		8.47066
Eif3d	1.112e-15	2.176e-14	8.3979	8.3698	8.545	8.4149	8.6165	0	0	0	0	0		8.46882
Dda1	5.263e-10	8.725e-10	8.5165	8.9372	8.7136	8.646	7.5298	0	0	0	0	0		8.46862
Zzef1	6.678e-15	7.931e-14	8.445	8.6221	8.5407	8.438	8.2668	0	0	0	0	0		8.46252
Cryab	1.04e-10	2.097e-10	8.2579	8.8872	8.6154	8.7596	7.7846	0	0	0	0	0		8.46094
Gna11	1.552e-06	1.723e-06	9.9067	9.6489	9.913	9.7877	10.63	1.8074	2.6554	0	0	3.121		8.4605
Cluh	2.056e-10	3.83e-10	9.3061	8.4111	8.2517	8.2148	8.1143	0	0	0	0	0		8.4596
Mon2	1.002e-18	1.962e-16	8.3979	8.4258	8.487	8.487	8.4975	0	0	0	0	0		8.45904
Shmt2	1.926e-12	7.28e-12	8.6489	8.3505	8.1298	8.3536	8.8119	0	0	0	0	0		8.45894
Plxnb2	3.319e-15	4.872e-14	8.5415	8.4911	8.3576	8.5943	8.3074	0	0	0	0	0		8.45838
Crot	3.805e-11	8.87e-11	8.3133	8.8903	8.4561	8.7448	7.8869	0	0	0	0	0		8.45828
Agap1	9.853e-13	4.133e-12	8.5384	8.614	8.5337	8.5846	8.0174	0	0	0	0	0		8.45762
Me2	2.305e-11	5.817e-11	8.3349	8.7596	8.7173	8.5999	7.8667	0	0	0	0	0		8.45568
Ubl7	3.272e-14	2.715e-13	8.2197	8.4594	8.646	8.5534	8.3949	0	0	0	0	0		8.45468
Clptm1	5.058e-12	1.624e-11	8.0246	8.4692	8.4317	8.4458	8.8851	0	0	0	0	0		8.45128
Nup214	5.179e-12	1.652e-11	8.6373	8.6489	8.5098	8.5196	7.9117	0	0	0	0	0		8.44546
Mb21d2	6.047e-11	1.308e-10	8.4081	8.8991	8.3487	8.7334	7.8208	0	0	0	0	0		8.44202
Tmem11	1.259e-11	3.512e-11	8.3633	8.2896	8.3641	8.1584	9.0329	0	0	0	0	0		8.44166
Wars2	2.062e-12	7.666e-12	8.4183	8.6621	8.438	8.6735	8.0028	0	0	0	0	0		8.43894
Nup50	2.265e-11	5.738e-11	8.4975	8.6366	8.6521	8.6121	7.7905	0	0	0	0	0		8.43776
Nit1	2.284e-15	3.677e-14	8.4216	8.4951	8.5177	8.5114	8.2417	0	0	0	0	0		8.4375
Trmt112	6.926e-09	9.154e-09	8.6431	9.0312	8.4931	8.8777	7.1416	0	0	0	0	0		8.43734
Ppp2r5c	8.061e-13	3.535e-12	8.2002	8.7415	8.263	8.3349	8.6467	0	0	0	0	0		8.43726
Csnk1a1	4.111e-11	9.442e-11	8.4047	8.0196	8.4263	8.2522	9.0816	0	0	0	0	0		8.43688
Pten	5.511e-13	2.624e-12	8.2158	8.3461	8.3711	8.4005	8.8234	0	0	0	0	0		8.43138
Asah1	4.226e-12	1.391e-11	8.0682	8.409	8.403	8.372	8.8963	0	0	0	0	0		8.4297
Dzank1	1.768e-15	3.083e-14	8.3349	8.5395	8.4846	8.499	8.2831	0	0	0	0	0		8.42822
Cpt1a	1.978e-15	3.323e-14	8.2351	8.5058	8.4615	8.5141	8.4237	0	0	0	0	0		8.42804
Pank4	9.682e-16	2.006e-14	8.3097	8.5322	8.5228	8.4405	8.3314	0	0	0	0	0		8.42732
Snf8	2.307e-15	3.684e-14	8.4911	8.4267	8.4409	8.5395	8.2351	0	0	0	0	0		8.42666
Vldlr	2.362e-10	4.298e-10	9.2729	8.3624	8.3029	8.1829	8.0118	0	0	0	0	0		8.42658
Gmpr2	9.601e-15	1.031e-13	8.3492	8.5588	8.4325	8.5542	8.2341	0	0	0	0	0		8.42576
Hdac5	1.417e-13	8.686e-13	8.5477	8.4765	8.4388	8.5736	8.0922	0	0	0	0	0		8.42576
Nup58	7.452e-13	3.326e-12	8.7303	8.2408	8.4	8.1594	8.5981	0	0	0	0	0		8.42572
Psmb2	8.974e-14	6.167e-13	8.3314	8.4672	8.2489	8.3478	8.7197	0	0	0	0	0		8.423
Atf2	3.446e-12	1.177e-11	8.3206	8.6543	8.6003	8.5736	7.9577	0	0	0	0	0		8.4213
Ubap2l	2.593e-11	6.442e-11	12.333	11.784	11.924	11.941	11.639	3.3363	3.5236	3.8679	3.6206	3.1699		8.42054
2210010C04Rik	8.838e-10	1.392e-09	8.7652	8.6742	8.2877	8.9054	7.4668	0	0	0	0	0		8.41986
Mrpl39	5.982e-14	4.484e-13	8.317	8.5588	8.5865	8.457	8.1704	0	0	0	0	0		8.41794
Sirpa	2.265e-09	3.272e-09	11.673	12.03	11.626	11.937	12.04	3.511	2.433	3.3923	4.0531	3.8278		8.41776
Cpne9	3.265e-11	7.812e-11	8.4081	8.9042	8.4388	8.503	7.8323	0	0	0	0	0		8.41728
Abhd12	2.836e-10	5.043e-10	8.5932	8.0307	8.097	8.137	9.2226	0	0	0	0	0		8.4161
Cmbl	2.669e-13	1.474e-12	8.4183	8.4725	8.5357	8.5872	8.0564	0	0	0	0	0		8.41402
Dip2c	6.834e-18	6.567e-16	8.4717	8.4623	8.4195	8.3628	8.3492	0	0	0	0	0		8.4131
Smap	6.165e-15	7.524e-14	8.5569	8.4174	8.2026	8.4102	8.4729	0	0	0	0	0		8.412
Lrrtm4	6.668e-10	1.078e-09	8.7357	8.8811	8.1679	8.7334	7.5384	0	0	0	0	0		8.4113
Brox	1.202e-12	4.907e-12	8.5962	8.2099	8.1809	8.2997	8.7519	0	0	0	0	0		8.40772
Rae1	2.176e-11	5.548e-11	8.5259	8.6392	8.3487	8.7166	7.8054	0	0	0	0	0		8.40716
Ralgapb	5.589e-12	1.765e-11	8.2766	8.2007	8.3255	8.278	8.9487	0	0	0	0	0		8.4059
Tomm6	2.366e-11	5.956e-11	8.6228	8.7197	8.2279	8.6044	7.8373	0	0	0	0	0		8.40242
Fah	1.305e-11	3.631e-11	8.7993	8.55	8.3794	8.406	7.8685	0	0	0	0	0		8.40064
Xpo5	1.346e-15	2.479e-14	8.2877	8.501	8.487	8.4396	8.2785	0	0	0	0	0		8.39876
Aplp1	2.326e-14	2.035e-13	8.4149	8.1649	8.4774	8.3536	8.5778	0	0	0	0	0		8.39772
NOGENE	1.142e-07	1.344e-07	8.7221	7.417	8.1533	7.6073	10.081	0	0	0	0	0		8.39614
Dpp8	1.858e-12	7.074e-12	8.7056	8.1898	8.3065	8.1236	8.6496	0	0	0	0	0		8.39502
Kyat1	5.651e-12	1.779e-11	8.7221	8.4983	8.2341	8.555	7.9402	0	0	0	0	0		8.38994
Tmcc1	3.511e-11	8.31e-11	8.3841	8.7296	8.5236	8.5721	7.7361	0	0	0	0	0		8.3891
Elp1	1.003e-16	4.018e-15	8.3597	8.4594	8.3246	8.3161	8.4842	0	0	0	0	0		8.3888
Commd10	5.52e-10	9.097e-10	8.3562	8.6568	8.6738	8.7784	7.4512	0	0	0	0	0		8.38328
Cntnap1	9.272e-14	6.307e-13	8.4684	8.3188	8.2403	8.2211	8.6589	0	0	0	0	0		8.3815
Chchd4	2.058e-08	2.565e-08	9.1642	7.6611	7.824	7.7892	9.4576	0	0	0	0	0		8.37922
Mt1	8.448e-08	1.005e-07	8.2877	9.0599	9.1137	8.797	6.6352	0	0	0	0	0		8.3787
Rpl22l1	2.212e-14	1.961e-13	8.3242	8.571	8.3584	8.4656	8.1649	0	0	0	0	0		8.37682
Naa10	1.339e-11	3.711e-11	8.6199	8.0954	8.1689	8.1421	8.8549	0	0	0	0	0		8.37624
Hsd11b1	4.833e-12	1.563e-11	8.5872	8.3385	8.1064	8.0682	8.7589	0	0	0	0	0		8.37184
Slc25a51	8.787e-13	3.769e-12	8.3562	8.1538	8.3461	8.2221	8.7768	0	0	0	0	0		8.371
Shisa9	3.405e-18	4.09e-16	8.2803	8.4009	8.391	8.3979	8.3833	0	0	0	0	0		8.37068
Unc5c	2.118e-12	7.84e-12	8.6489	8.4491	8.3663	8.4607	7.9224	0	0	0	0	0		8.36948
Zdhhc5	5.179e-10	8.613e-10	8.4975	8.8805	8.2886	8.6889	7.4886	0	0	0	0	0		8.36882
Grm7	4.511e-14	3.527e-13	8.1436	8.5255	8.385	8.5263	8.2626	0	0	0	0	0		8.3686
Csnk1e	9.38e-12	2.751e-11	8.7599	8.5557	7.9617	8.4413	8.1127	0	0	0	0	0		8.36626
Mtx2	4.923e-15	6.459e-14	8.1844	8.4225	8.3768	8.317	8.5255	0	0	0	0	0		8.36524
Ergic1	4.409e-12	1.443e-11	8.0853	8.1664	8.4056	8.3215	8.8445	0	0	0	0	0		8.36466
Atp6ap2	1.055e-13	6.925e-13	8.1064	8.3872	8.4463	8.6021	8.2771	0	0	0	0	0		8.36382
Oplah	1.148e-12	4.714e-12	8.3492	8.6121	8.4204	8.4838	7.9501	0	0	0	0	0		8.36312
Cpne2	9.542e-15	1.027e-13	8.5165	8.1799	8.2946	8.3358	8.4774	0	0	0	0	0		8.36084
Mrpl49	2.899e-12	1.012e-11	8.284	8.5434	8.5388	8.5357	7.8978	0	0	0	0	0		8.35994
Impad1	5.488e-11	1.206e-10	8.8376	8.4684	8.4162	8.3452	7.7149	0	0	0	0	0		8.35646
Lrrc8a	1.823e-16	6.302e-15	8.2987	8.4111	8.2583	8.3318	8.4639	0	0	0	0	0		8.35276
Btf3	1.438e-12	5.719e-12	8.5477	8.4692	8.2955	8.5232	7.9278	0	0	0	0	0		8.35268
Golgb1	1.89e-12	7.159e-12	8.4183	8.5902	8.3641	8.4854	7.9003	0	0	0	0	0		8.35166
Vamp1	1.954e-10	3.663e-10	8.8173	8.1579	7.9224	7.9413	8.8975	0	0	0	0	0		8.34728
Isca2	1.713e-09	2.527e-09	8.3024	8.9545	8.4802	8.6809	7.3165	0	0	0	0	0		8.3469
FAF1	4.321e-11	9.831e-11	8.0067	8.4267	8.7469	8.6809	7.8716	0	0	0	0	0		8.34656
Smu1	3.97e-15	5.595e-14	8.1684	8.2919	8.4692	8.3518	8.45	0	0	0	0	0		8.34626
Ptpn5	4.756e-13	2.334e-12	8.614	8.4684	8.3672	8.2555	8.0224	0	0	0	0	0		8.3455
Acbd3	1.811e-12	6.94e-12	8.7357	8.0773	8.343	8.4237	8.1236	0	0	0	0	0		8.34066
Mia2	1.192e-14	1.221e-13	8.4013	8.5137	8.3097	8.3434	8.1288	0	0	0	0	0		8.33938
Stard10	9.211e-12	2.707e-11	8.0553	8.6865	8.5423	8.4717	7.9396	0	0	0	0	0		8.33908
Gsdme	3.004e-14	2.528e-13	8.1684	8.4672	8.4578	8.4191	8.1543	0	0	0	0	0		8.33336
Phf20l1	4.511e-10	7.617e-10	8.6021	8.7918	8.3737	8.4607	7.4321	0	0	0	0	0		8.33208
Nup210	2.461e-13	1.373e-12	8.0246	8.5846	8.4102	8.3518	8.2663	0	0	0	0	0		8.3275
Acaca	5.009e-18	5.294e-16	8.4149	8.2757	8.3255	8.3015	8.3102	0	0	0	0	0		8.32556
Nid2	1.384e-11	3.815e-11	8.7139	8.3646	8.3759	8.3659	7.7722	0	0	0	0	0		8.3185
Gid8	7.859e-11	1.637e-10	8.1764	8.7512	8.391	8.5981	7.6675	0	0	0	0	0		8.31684
Ube2j1	1.367e-11	3.776e-11	8.1599	8.029	8.3165	8.1669	8.8918	0	0	0	0	0		8.31282
Tbc1d9b	2.975e-16	8.641e-15	8.3876	8.3932	8.2621	8.1849	8.3314	0	0	0	0	0		8.31184
Cldn11	6.929e-09	9.155e-09	8.6431	7.7149	8.014	7.7293	9.4564	0	0	0	0	0		8.31154
Lingo1	3.254e-06	3.581e-06	10.299	9.8114	9.7859	9.735	10.614	2.9449	2.8278	0	0	2.926		8.30932
Cnot1	2.528e-15	3.962e-14	8.2616	8.4204	8.3038	8.4141	8.1421	0	0	0	0	0		8.3084
Crbn	1.226e-11	3.444e-11	7.8851	8.1303	8.4068	8.3255	8.7843	0	0	0	0	0		8.3064
Wdr12	2.013e-10	3.76e-10	8.9117	8.3602	8.4471	8.2158	7.5954	0	0	0	0	0		8.30604
Ndufaf4	4.914e-12	1.583e-11	8.1355	8.6077	8.4496	8.4648	7.8704	0	0	0	0	0		8.3056
Cdh6	3.608e-13	1.875e-12	8.529	8.5118	8.1267	8.2987	8.0596	0	0	0	0	0		8.30516
Fibp	4.358e-15	5.939e-14	8.1148	8.3483	8.3255	8.271	8.452	0	0	0	0	0		8.30232
Gnl1	6.576e-13	3.014e-12	8.1064	8.1908	8.2955	8.2148	8.6977	0	0	0	0	0		8.30104
Zpr1	4.562e-12	1.488e-11	8.7599	8.0747	8.3079	8.334	8.0084	0	0	0	0	0		8.29698
Wdr26	7.613e-12	2.305e-11	8.0157	8.571	8.4623	8.5329	7.8985	0	0	0	0	0		8.29608
Cdkn2aip	1.042e-12	4.331e-12	8.2579	8.6268	8.2351	8.385	7.9525	0	0	0	0	0		8.29146
Nt5c2	5.213e-13	2.511e-12	8.0023	8.255	8.3197	8.2374	8.6283	0	0	0	0	0		8.28854
Dnajb6	1.34e-06	1.491e-06	10.751	11.052	10.889	10.913	10.301	3.4594	2.7004	3.263	0	3.0531		8.28602
C2cd5	4.39e-12	1.438e-11	8.5932	8.0224	8.1288	8.0634	8.6114	0	0	0	0	0		8.28384
Copg2	1.223e-16	4.684e-15	8.3206	8.3615	8.1972	8.3376	8.1992	0	0	0	0	0		8.28322
Arfgef3	8.772e-13	3.766e-12	8.2541	8.2747	8.0477	8.1584	8.6805	0	0	0	0	0		8.28308
Hecw1	1.3e-13	8.185e-13	8.1883	8.507	8.2715	8.4157	8.0268	0	0	0	0	0		8.28186
G3bp1	7.471e-11	1.567e-10	8.391	8.571	8.2456	8.6162	7.5812	0	0	0	0	0		8.281
Mrps26	1.63e-09	2.416e-09	8.284	8.7807	8.4508	8.6341	7.2259	0	0	0	0	0		8.2751
Sult4a1	1.123e-11	3.205e-11	7.7569	8.3228	8.6575	8.2351	8.4	0	0	0	0	0		8.27446
Wdr45	1.402e-14	1.383e-13	8.4149	8.3174	8.2905	8.3138	8.0334	0	0	0	0	0		8.274
Fen1	1.32e-10	2.59e-10	8.3421	8.6532	8.3314	8.5322	7.5078	0	0	0	0	0		8.27334
R3hdm2	1.259e-12	5.106e-12	8.3456	8.4794	8.3224	8.3711	7.8361	0	0	0	0	0		8.27092
Dync1li1	6.869e-12	2.113e-11	12.255	12.26	12.331	12.295	12.628	3.9819	4.3716	3.797	3.9069	4.3646		8.2694
Psap	1.286e-10	2.532e-10	11.439	10.735	10.87	10.72	11.375	2.511	2.8679	2.511	2.7442	3.1699		8.267
Qrsl1	3.017e-12	1.05e-11	8.3979	8.507	8.2065	8.4141	7.8067	0	0	0	0	0		8.26644
BC037034	1.626e-14	1.554e-13	8.3979	8.0848	8.2143	8.1992	8.4305	0	0	0	0	0		8.26534
Vps36	1.636e-13	9.829e-13	8.3278	8.4541	8.2016	8.3628	7.9536	0	0	0	0	0		8.25998
Carmil2	2.295e-11	5.801e-11	8.7194	8.2974	8.3106	8.2522	7.7101	0	0	0	0	0		8.25794
Mdga2	1.4e-14	1.383e-13	8.3314	8.4421	8.2216	8.2322	8.0585	0	0	0	0	0		8.25716
Spg7	6.371e-14	4.696e-13	8.0422	8.4132	8.3129	8.4085	8.109	0	0	0	0	0		8.25716
Gng7	2.972e-16	8.641e-15	8.3206	8.1288	8.2682	8.2129	8.3487	0	0	0	0	0		8.25584
Gcdh	4.164e-11	9.543e-11	8.0246	8.7112	8.0006	8.637	7.8966	0	0	0	0	0		8.254
Trim3	8.895e-11	1.828e-10	7.799	8.7077	8.4578	8.503	7.7964	0	0	0	0	0		8.25278
Tmem106b	2.188e-18	3.257e-16	8.2691	8.3142	8.2531	8.2187	8.1903	0	0	0	0	0		8.24908
Kazn	8.389e-13	3.637e-12	8.4516	8.3763	8.1908	8.3501	7.8561	0	0	0	0	0		8.24498
Abraxas2	4.879e-15	6.446e-14	8.2235	8.1799	8.3188	8.0827	8.4051	0	0	0	0	0		8.242
Gucy1a2	1.861e-12	7.075e-12	8.3421	8.0251	8.1122	8.0725	8.6568	0	0	0	0	0		8.24174
Nup62	9.69e-17	3.909e-15	8.3097	8.2677	8.1689	8.3092	8.1513	0	0	0	0	0		8.24136
Rabgap1l	1.859e-14	1.711e-13	8.2235	8.4471	8.1962	8.2946	8.0433	0	0	0	0	0		8.24094
Cpne1	3.171e-09	4.448e-09	8.4384	7.8486	7.7905	7.7951	9.3289	0	0	0	0	0		8.2403
Lancl1	3.489e-14	2.868e-13	8.2235	8.4594	8.0224	8.2909	8.1844	0	0	0	0	0		8.23612
Psmd7	4.476e-13	2.225e-12	8.56	8.2512	7.949	8.1709	8.247	0	0	0	0	0		8.23562
Mef2d	1.65e-10	3.147e-10	8.6802	8.3794	8.2226	8.4208	7.4668	0	0	0	0	0		8.23396
Habp4	6.609e-14	4.844e-13	8.3668	8.0693	8.3536	8.334	8.0107	0	0	0	0	0		8.22688
Ptpns1	3.016e-09	4.248e-09	11.463	11.803	11.402	11.737	11.923	3.511	2.433	3.3923	4.0531	3.8278		8.22216
Nos1ap	1.691e-11	4.51e-11	8.8173	8.052	8.2206	7.9875	8.0301	0	0	0	0	0		8.2215
Naa15	1.715e-14	1.616e-13	8.4149	8.2279	8.0056	8.2432	8.2138	0	0	0	0	0		8.22108
Atxn2	8.667e-14	6.011e-13	8.2951	8.1085	8.0301	8.1774	8.4862	0	0	0	0	0		8.21946
Vip	8.16e-12	2.439e-11	8.4586	8.5376	8.1007	8.2503	7.7482	0	0	0	0	0		8.21908
Wdr82	6.508e-13	2.996e-12	8.1477	8.1503	8.0949	8.0757	8.6242	0	0	0	0	0		8.21856
Bcl7a	2.114e-09	3.067e-09	9.0201	7.8802	7.7053	7.7032	8.7754	0	0	0	0	0		8.21684
Ankrd34b	1.574e-10	3.021e-10	8.2235	8.531	8.3421	8.5298	7.4313	0	0	0	0	0		8.21154
Tapt1	2.374e-13	1.33e-12	7.8704	8.1943	8.3006	8.3785	8.3133	0	0	0	0	0		8.21142
Ptpra	3.372e-13	1.771e-12	7.9519	8.1452	8.1883	8.2167	8.5361	0	0	0	0	0		8.20764
Stxbp5	4.215e-07	4.792e-07	10.322	10.406	10.304	10.358	10.224	2.3219	3.0704	2.263	0	2.926		8.20654
Stam2	3.034e-12	1.053e-11	8.3314	8.388	8.3056	8.2909	7.7142	0	0	0	0	0		8.20602
Ccny	2.337e-11	5.888e-11	8.3097	7.8285	8.1324	7.9801	8.7566	0	0	0	0	0		8.20146
Slc25a1	4.857e-13	2.379e-12	8.1272	7.9949	8.1558	8.1421	8.5763	0	0	0	0	0		8.19926
Setd3	7.094e-13	3.202e-12	8.0596	8.0773	8.1492	8.1017	8.6081	0	0	0	0	0		8.19918
Hdac2	5.837e-15	7.229e-14	8.0596	8.1349	8.1477	8.2621	8.3837	0	0	0	0	0		8.1976
Rims2	2.073e-11	5.342e-11	8.6286	8.4237	7.9478	8.2303	7.7542	0	0	0	0	0		8.19692
Pcyt1a	1.52e-10	2.934e-10	8.435	8.6312	8.2026	8.2564	7.4421	0	0	0	0	0		8.19346
Kcnj10	5.628e-13	2.67e-12	8.3421	8.1365	7.926	8.0591	8.487	0	0	0	0	0		8.19014
Mrpl40	5.534e-11	1.213e-10	8.7572	8.3219	7.9413	8.1943	7.7074	0	0	0	0	0		8.18442
Map1s	8.918e-10	1.404e-09	9.0112	8.343	7.8636	8.1972	7.5046	0	0	0	0	0		8.18392
Bpgm	2.727e-15	4.153e-14	7.9977	8.255	8.2531	8.2663	8.1431	0	0	0	0	0		8.18304
Exoc6	2.843e-13	1.554e-12	8.5133	8.236	8.0006	8.0438	8.1153	0	0	0	0	0		8.1818
Spty2d1	9.749e-10	1.523e-09	8.6546	7.7774	7.7761	7.7529	8.934	0	0	0	0	0		8.179
Syn1	1.111e-11	3.179e-11	15.755	15.824	15.719	15.918	15.682	7.6753	7.1839	7.8022	7.9641	7.4111		8.17228
Sephs1	1.636e-10	3.124e-10	8.3527	8.4491	8.1709	8.4963	7.388	0	0	0	0	0		8.1714
Hscb	1.813e-12	6.94e-12	8.2002	8.4429	8.2351	8.236	7.7408	0	0	0	0	0		8.171
Olfr267	2.238e-11	5.691e-11	8.5415	8.3142	8.2724	8.1324	7.5932	0	0	0	0	0		8.17074
Sytl2	3.449e-12	1.178e-11	8.2312	8.509	8.225	8.1528	7.7306	0	0	0	0	0		8.16972
Mrps27	7.475e-14	5.343e-13	8.1272	8.4162	8.1231	8.2341	7.9419	0	0	0	0	0		8.1685
Thsd7a	7.954e-13	3.503e-12	8.4013	7.9594	8.1809	7.8972	8.3837	0	0	0	0	0		8.1645
Dnm2	1.236e-13	7.918e-13	8.3133	8.2882	8.2109	8.1553	7.853	0	0	0	0	0		8.16414
Atp5s	1.076e-14	1.124e-13	7.9704	8.2789	8.2682	8.224	8.0688	0	0	0	0	0		8.16206
Ybx1	9.109e-11	1.865e-10	8.2503	8.5755	8.0045	8.4615	7.5133	0	0	0	0	0		8.16102
Gfra2	1.102e-11	3.156e-11	8.0157	7.9738	8.3897	7.8112	8.5962	0	0	0	0	0		8.15732
Rufy1	4.42e-12	1.445e-11	8.0201	8.499	8.1774	8.334	7.7489	0	0	0	0	0		8.15588
Slc20a2	1.313e-12	5.286e-12	8.1684	8.1579	7.9893	7.9087	8.5527	0	0	0	0	0		8.1554
Ranbp9	2.235e-10	4.104e-10	8.0378	8.6158	8.1436	8.5329	7.4313	0	0	0	0	0		8.15228
Tomm22	3.258e-10	5.703e-10	7.8455	8.6907	8.1246	8.5823	7.511	0	0	0	0	0		8.15082
Nsmf	8.052e-11	1.673e-10	8.7357	8.3097	7.939	8.1272	7.6242	0	0	0	0	0		8.14716
Efl1	1.391e-12	5.561e-12	8.5228	8.0017	8.0488	7.8918	8.2579	0	0	0	0	0		8.1446
Flad1	1.124e-15	2.192e-14	8.1064	8.1365	8.0201	8.1528	8.3024	0	0	0	0	0		8.14364
Npl	5.92e-10	9.698e-10	8.0639	8.5755	8.3776	8.4421	7.2489	0	0	0	0	0		8.1416
Slc39a12	2.838e-14	2.404e-13	8.2877	8.1426	7.9443	8.0229	8.2822	0	0	0	0	0		8.13594
Vps51	1.226e-13	7.861e-13	7.9284	8.1184	8.2724	7.9864	8.3619	0	0	0	0	0		8.1335
Edc3	3.341e-14	2.759e-13	7.9519	8.0602	8.3452	8.2293	8.0596	0	0	0	0	0		8.12924
Sart3	5.157e-13	2.491e-12	8.4216	8.2494	8.1344	7.9715	7.8667	0	0	0	0	0		8.12872
Abcf3	1.61e-11	4.343e-11	8.6373	8.1933	8.1028	8.0006	7.706	0	0	0	0	0		8.128
Txndc5	6.325e-07	7.124e-07	10.368	10.319	10.556	10.549	10.052	0	2.9449	3.1043	2.6088	2.5607		8.12506
Ccdc9	8.992e-13	3.832e-12	8.1518	8.2303	8.1844	8.3349	7.7211	0	0	0	0	0		8.1245
Aprt	1.113e-12	4.584e-12	8.1639	7.8924	7.9478	8.1038	8.5086	0	0	0	0	0		8.1233
Lyrm7	6.238e-11	1.342e-10	8.2616	8.4911	8.1106	8.3006	7.4471	0	0	0	0	0		8.1222
Pdzd11	4.362e-11	9.889e-11	8.0896	8.4225	8.2269	8.3776	7.4741	0	0	0	0	0		8.11814
Hspg2	7.323e-12	2.234e-11	8.1477	8.3987	8.1513	8.2896	7.6029	0	0	0	0	0		8.11804
Ctsa	2.833e-13	1.551e-12	7.7728	8.1277	8.1568	8.2119	8.3097	0	0	0	0	0		8.11578
Xpr1	1.225e-13	7.861e-13	7.8151	8.3142	8.1799	8.1421	8.1054	0	0	0	0	0		8.11134
Rgs7bp	3.849e-14	3.13e-13	8.0682	8.0157	8.0634	8.0163	8.3915	0	0	0	0	0		8.11102
Cstb	7.361e-11	1.548e-10	10.81	11.172	11.116	11.089	10.352	3.0531	2.7004	2.7225	3	2.511		8.1104
Limch1	1.792e-12	6.882e-12	8.0596	8.3188	8.256	8.2322	7.6844	0	0	0	0	0		8.1102
Acsf3	1.191e-11	3.359e-11	7.8654	8.4275	8.1789	8.3893	7.6858	0	0	0	0	0		8.10938
Vwa5a	5.63e-12	1.774e-11	8.2274	7.9738	7.8985	7.8697	8.5748	0	0	0	0	0		8.10884
Shc3	6.105e-12	1.907e-11	8.1962	8.3975	8.1096	8.2303	7.6066	0	0	0	0	0		8.10804
Mterf2	4.539e-11	1.023e-10	7.73	8.4713	8.2569	8.4183	7.6625	0	0	0	0	0		8.1078
Sec61a1	1.06e-11	3.052e-11	8.1231	8.0129	7.8405	7.9069	8.646	0	0	0	0	0		8.10588
Serpinb1a	6.561e-12	2.026e-11	8.1684	8.223	8.1344	8.403	7.5984	0	0	0	0	0		8.10544
Rab4a	1.025e-15	2.066e-14	8.0896	7.975	8.0938	8.1028	8.2579	0	0	0	0	0		8.10382
Fgf12	1.478e-14	1.43e-13	8.2274	8.0875	8.2065	8.1236	7.8741	0	0	0	0	0		8.10382
Chmp1b1	5.681e-11	1.241e-10	8.0938	8.3837	8.1117	8.4508	7.4512	0	0	0	0	0		8.09824
Msi2	2.021e-11	5.232e-11	8.1272	8.2327	8.3372	8.2987	7.4935	0	0	0	0	0		8.09786
Pgrmc2	2.865e-12	1.002e-11	8.4878	8.2293	7.7931	8.052	7.9218	0	0	0	0	0		8.0968
Kiaa0319l	2.287e-12	8.359e-12	8.3349	8.1252	8.225	8.1303	7.6453	0	0	0	0	0		8.09214
Qars	1.747e-10	3.315e-10	7.8948	8.5653	8.2133	8.3694	7.4051	0	0	0	0	0		8.08958
Sv2b	1.195e-08	1.534e-08	11.59	11.452	11.852	11.582	12.585	3.511	4.2479	3.4463	2.9449	4.4725		8.08768
Ptpn1	4.07e-16	1.056e-14	8.0896	8.0307	8.0285	8.0449	8.2413	0	0	0	0	0		8.087
Lias	7.683e-11	1.606e-10	8.1396	8.4309	8.1568	8.3129	7.3837	0	0	0	0	0		8.08478
Rtkn	1.968e-14	1.772e-13	8.0768	8.2583	8.0891	8.1401	7.858	0	0	0	0	0		8.08446
Rragc	6.697e-13	3.056e-12	8.2465	7.9378	7.8722	7.9635	8.3962	0	0	0	0	0		8.08324
Kif1bp	2.776e-13	1.527e-12	8.4047	8.1262	7.8679	8.0334	7.983	0	0	0	0	0		8.08304
Erbb4	3.017e-16	8.713e-15	8.0157	8.1799	8.0537	8.1679	7.9949	0	0	0	0	0		8.08242
Dgkd	1.146e-11	3.255e-11	8.2274	8.4017	8.1246	8.1059	7.543	0	0	0	0	0		8.08052
Tnpo3	2.655e-13	1.468e-12	7.7833	8.2041	8.3006	8.1174	7.987	0	0	0	0	0		8.07848
Cavin1	4.525e-08	5.486e-08	7.8997	8.7221	8.6395	8.5649	6.5454	0	0	0	0	0		8.07432
Lyplal1	3.513e-12	1.194e-11	7.8753	8.3394	8.1523	8.3006	7.6977	0	0	0	0	0		8.07306
Syap1	1.697e-06	1.883e-06	10.579	10.663	10.735	10.755	10.093	2.9069	3.6893	2.8679	3	0		8.07218
Ppm1l	3.43e-10	5.961e-10	8.1022	8.5196	8.137	8.3461	7.2394	0	0	0	0	0		8.06886
Shank3	2.011e-11	5.211e-11	12.553	12.526	12.347	12.502	11.978	4.0356	4.3219	4.406	4.1293	4.6724		8.06816
Actb	1.063e-06	1.187e-06	9.6402	9.6383	9.7098	9.5868	9.107	2.406	0	2.263	2.6781	0		8.067
Sestd1	6.282e-13	2.912e-12	8.1962	8.1933	8.0736	8.1689	7.6703	0	0	0	0	0		8.06046
Tm9sf3	2.225e-14	1.97e-13	7.9658	7.8912	8.1007	8.0591	8.2785	0	0	0	0	0		8.05906
Sntb2	3.812e-10	6.556e-10	8.1396	8.2859	7.987	8.6099	7.2649	0	0	0	0	0		8.05746
Mycbp2	2.883e-12	1.008e-11	7.975	8.1349	8.3584	8.1624	7.6352	0	0	0	0	0		8.05318
Pmpcb	1.885e-12	7.148e-12	8.2541	8.2826	7.9571	8.1085	7.6561	0	0	0	0	0		8.05168
Ndufb6	2.098e-10	3.898e-10	7.9189	8.5446	8.0784	8.3685	7.3478	0	0	0	0	0		8.05164
Vipas39	9.831e-13	4.127e-12	7.9284	7.7918	8.0725	8.029	8.4254	0	0	0	0	0		8.04942
Etnppl	7.143e-12	2.189e-11	8.1804	8.3785	8.0129	8.1007	7.5622	0	0	0	0	0		8.04694
Acox1	2.449e-16	7.749e-15	7.9704	8.1513	8.12	7.9836	8.0034	0	0	0	0	0		8.04574
Mtx1	5.213e-10	8.656e-10	8.1764	7.7462	7.7469	7.6568	8.8991	0	0	0	0	0		8.04508
Xrn2	1.222e-13	7.861e-13	7.9519	8.098	7.7859	8.263	8.1241	0	0	0	0	0		8.04458
Ankmy2	1.194e-13	7.698e-13	7.9704	7.882	8.0384	7.9635	8.3496	0	0	0	0	0		8.04078
Zfyve19	3.575e-15	5.121e-14	8.0725	8.1059	8.1467	8.0323	7.8455	0	0	0	0	0		8.04058
Kiaa1522	3.562e-11	8.408e-11	8.0422	8.3837	8.0922	8.2593	7.4246	0	0	0	0	0		8.0404
Uap1	3.597e-13	1.871e-12	7.9704	8.2075	8.1447	8.1563	7.6997	0	0	0	0	0		8.03572
Cisd3	3.952e-13	2.018e-12	7.9932	7.9266	8.024	7.8342	8.3859	0	0	0	0	0		8.03278
Stx7	1.39e-09	2.093e-09	11.114	11.312	11.364	11.251	11.129	3.2327	2.263	3.2479	3.8176	3.4463		8.0325
Sdc4	2.223e-09	3.216e-09	9.0725	7.6439	7.7218	7.5804	8.136	0	0	0	0	0		8.03092
Iqcb1	1.51e-11	4.121e-11	8.5196	7.8741	8.0891	8.052	7.6147	0	0	0	0	0		8.0299
Cnot2	2.65e-15	4.071e-14	7.8997	8.0307	8.1246	8.1528	7.9325	0	0	0	0	0		8.02806
Abl2	1.947e-11	5.077e-11	8.4047	8.2812	7.8574	8.0449	7.5446	0	0	0	0	0		8.02656
Vac14	4.366e-15	5.939e-14	8.1106	7.9767	8.0864	7.8379	8.1189	0	0	0	0	0		8.0261
Ccs	5.6e-12	1.768e-11	8.445	7.8157	7.8906	7.7602	8.2114	0	0	0	0	0		8.02458
Hmg20a	2.537e-15	3.962e-14	8.1639	8.0329	8.0736	7.991	7.8605	0	0	0	0	0		8.02438
Nudt4	4.69e-11	1.051e-10	8.0246	8.2327	8.2303	8.2583	7.3584	0	0	0	0	0		8.02086
Cggbp1	6.844e-11	1.453e-10	8.1804	8.2771	8.1679	8.1624	7.3074	0	0	0	0	0		8.01904
Hpcal4	8.88e-09	1.158e-08	12.02	11.749	11.877	11.855	12.846	4.2016	4.1619	3.8679	3.2016	4.8278		8.01724
Acy1	5.479e-16	1.328e-14	7.9841	7.9847	8.1106	8.1075	7.8948	0	0	0	0	0		8.01634
Amt	9.408e-13	3.981e-12	8.0378	8.12	8.0433	8.2522	7.6272	0	0	0	0	0		8.0161
Ubash3b	4.792e-15	6.363e-14	7.9565	7.9692	8.1709	7.871	8.1038	0	0	0	0	0		8.01428
Haghl	4.833e-10	8.098e-10	7.9331	8.5098	8.1231	8.3111	7.1809	0	0	0	0	0		8.0116
Ap1s1	7.902e-13	3.483e-12	8.1923	8.1375	8.0356	8.0693	7.6154	0	0	0	0	0		8.01002
Atxn7l3b	4.455e-15	5.991e-14	8.0596	8.0251	8.0752	8.0827	7.7977	0	0	0	0	0		8.00806
Nqo1	1.132e-11	3.23e-11	8.0466	8.2374	8.1709	8.1344	7.4504	0	0	0	0	0		8.00794
Htt	1.53e-13	9.281e-13	7.8151	8.0612	7.8906	7.9536	8.2942	0	0	0	0	0		8.00294
Npc2	3.566e-16	9.701e-15	8.029	7.9536	8.0224	8.1085	7.8771	0	0	0	0	0		7.99812
Cacna2d3	3.151e-13	1.686e-12	11.191	11.082	11.051	11.061	11.084	3.0179	3.0179	3	3	3.4463		7.99738
Ephb3	3.986e-12	1.323e-11	7.9796	8.3514	8.0213	8.0602	7.5699	0	0	0	0	0		7.99648
Rps29	9.895e-14	6.606e-13	8.0246	8.1401	7.7602	8.1709	7.8685	0	0	0	0	0		7.99286
Ddx39b	6.181e-06	6.742e-06	10.487	10.516	10.537	10.452	11.009	1.8074	4.0959	3.585	0	3.5607		7.9904
Bckdhb	2.05e-16	6.813e-15	7.8851	8.029	8.1007	7.9853	7.9501	0	0	0	0	0		7.99004
Lama2	3.268e-10	5.717e-10	7.4085	8.1339	8.5046	8.3478	7.5523	0	0	0	0	0		7.98942
Tdrd3	3.086e-09	4.336e-09	8.7056	8.1553	7.9658	8.1699	6.9472	0	0	0	0	0		7.98876
Sqstm1	1.254e-15	2.374e-14	7.9284	7.8894	7.9733	8.1553	7.9927	0	0	0	0	0		7.98782
Ilkap	5.875e-11	1.278e-10	8.1518	8.2007	8.137	8.1487	7.2863	0	0	0	0	0		7.9849
Tmem126a	2.826e-09	4.012e-09	7.73	8.5058	8.0564	8.5973	7.0334	0	0	0	0	0		7.98458
Pcdh7	2.441e-11	6.114e-11	8.3737	8.2254	7.8486	7.996	7.4717	0	0	0	0	0		7.98308
Snd1	8.988e-13	3.832e-12	11.665	11.528	11.514	11.519	11.489	3.4195	3.3505	3.8875	3.6893	3.4725		7.97914
Clmn	6.2e-12	1.931e-11	7.5384	7.8297	8.0795	8.1659	8.2729	0	0	0	0	0		7.97728
Tspan7	5.187e-08	6.258e-08	9.4715	7.6242	7.0123	7.6893	8.0885	0	0	0	0	0		7.97716
Vps33b	3.06e-11	7.409e-11	7.4421	7.8189	8.2331	8.0406	8.3487	0	0	0	0	0		7.97668
Timm10	1.584e-10	3.038e-10	12.591	12.376	12.168	12.194	11.914	4.1538	3.9635	4.2555	4.1043	4.8972		7.97374
Adgrl3	5.213e-10	8.656e-10	11.566	11.051	11.001	11.028	10.831	3.3923	2.7866	2.8074	3.7549	2.8679		7.97358
Fxr1	3.045e-12	1.056e-11	8.2274	8.0558	7.5638	7.8517	8.1654	0	0	0	0	0		7.97282
Lars2	5.082e-17	2.441e-15	7.8654	8.0017	7.953	8.0449	7.9972	0	0	0	0	0		7.97244
Gatd1	3.094e-10	5.447e-10	8.0246	8.3505	8.0163	8.3092	7.1568	0	0	0	0	0		7.97148
Lman2l	2.272e-13	1.286e-12	8.2465	7.9583	7.8598	7.7347	8.058	0	0	0	0	0		7.97146
Hexim1	1.772e-10	3.36e-10	8.4782	8.1799	7.8253	8.0848	7.2854	0	0	0	0	0		7.97072
Pcna	2.519e-11	6.286e-11	8.2616	8.1749	7.953	8.0736	7.3742	0	0	0	0	0		7.96746
Borcs5	5.471e-13	2.61e-12	7.9236	8.1303	8.0384	8.1344	7.6103	0	0	0	0	0		7.9674
Rbm12	1.953e-12	7.356e-12	7.8041	8.0493	7.9519	8.347	7.6809	0	0	0	0	0		7.96664
Pbdc1	5.48e-17	2.544e-15	7.9284	7.9641	8.0488	8.0123	7.8741	0	0	0	0	0		7.96554
Ppp4r4	3.328e-15	4.872e-14	8.098	8.014	7.8747	8.0135	7.8163	0	0	0	0	0		7.9633
Dtd2	2.704e-15	4.13e-14	7.8605	7.996	7.9773	8.1236	7.8517	0	0	0	0	0		7.96182
Srp19	3.079e-11	7.439e-11	8.0067	8.2303	8.0864	8.1477	7.3345	0	0	0	0	0		7.96112
Mrpl52	1.525e-09	2.278e-09	7.6402	8.4882	8.3165	8.2673	7.079	0	0	0	0	0		7.95824
Snd1	9.874e-13	4.135e-12	11.656	11.501	11.49	11.491	11.468	3.4195	3.3505	3.8875	3.6893	3.4725		7.95734
Pip5k1a	9.886e-15	1.053e-13	7.7833	7.9366	7.9893	7.9272	8.1482	0	0	0	0	0		7.95692
Uros	2.964e-10	5.243e-10	7.8505	8.2724	8.1829	8.3083	7.1649	0	0	0	0	0		7.9558
Pdzd8	1.793e-11	4.744e-11	8.4911	7.8851	7.8183	7.9864	7.582	0	0	0	0	0		7.95258
Scai	2.541e-15	3.962e-14	7.8304	8.0318	7.8918	7.9021	8.0996	0	0	0	0	0		7.95114
Ttc33	1.64e-10	3.131e-10	8.7357	7.8424	7.7004	7.6893	7.7872	0	0	0	0	0		7.951
Rpgr	1.197e-11	3.371e-11	7.9472	8.2607	8.0312	8.0917	7.417	0	0	0	0	0		7.94956
Polr2l	5.942e-10	9.732e-10	7.8304	8.4923	8.0285	8.2644	7.1303	0	0	0	0	0		7.94918
Nipal3	1.897e-11	4.965e-11	8.1844	8.2327	7.9063	8.0301	7.3897	0	0	0	0	0		7.94864
AI837181	3.94e-10	6.744e-10	7.8605	8.4733	7.8771	8.3179	7.2046	0	0	0	0	0		7.94668
Scrib	1.174e-10	2.343e-10	7.8405	8.271	8.1503	8.2187	7.247	0	0	0	0	0		7.9455
Iqgap2	3.799e-13	1.961e-12	7.9472	8.139	8.0079	8.0356	7.5962	0	0	0	0	0		7.94518
Ube2e1	4.1e-15	5.725e-14	7.8802	8.0129	8.0345	8.0251	7.7662	0	0	0	0	0		7.94378
Slc25a20	1.843e-10	3.482e-10	8.1064	7.5835	7.7529	7.6184	8.6571	0	0	0	0	0		7.94366
Gm1971	3.997e-09	5.519e-09	8.4483	8.4842	7.8814	8.0509	6.853	0	0	0	0	0		7.94356
Stau2	1.499e-11	4.096e-11	8.0334	7.9989	8.1734	8.1215	7.3654	0	0	0	0	0		7.93852
Lnpep	4.23e-17	2.192e-15	7.8605	8.04	7.939	7.9384	7.9039	0	0	0	0	0		7.93636
Sdf4	3.206e-13	1.711e-12	8.0639	8.1503	7.9744	7.8424	7.6337	0	0	0	0	0		7.93294
Vps37b	2.424e-11	6.08e-11	8.3061	8.1908	7.7204	7.9921	7.4537	0	0	0	0	0		7.93262
Hcls1	2.045e-12	7.627e-12	7.8253	8.0693	7.9819	8.224	7.5546	0	0	0	0	0		7.93102
Pin4	6.959e-10	1.12e-09	8.6431	7.5078	7.717	7.4496	8.3309	0	0	0	0	0		7.92968
Gipc1	5.127e-11	1.136e-10	8.1923	8.1824	7.6949	8.2075	7.3654	0	0	0	0	0		7.9285
Ncbp1	1.885e-12	7.148e-12	7.7354	8.1158	7.5804	8.0406	8.1492	0	0	0	0	0		7.92428
Prex2	9.566e-14	6.457e-13	7.9141	8.1589	8.0213	7.7741	7.7408	0	0	0	0	0		7.92184
Ppp6r3	1.827e-10	3.453e-10	7.9887	7.5461	7.7129	7.6837	8.6668	0	0	0	0	0		7.91964
Pacsin3	3.153e-12	1.089e-11	8.3024	7.6511	7.9692	7.6703	7.9972	0	0	0	0	0		7.91804
Trappc9	4.36e-14	3.444e-13	7.6745	7.9536	7.9015	8.1117	7.9466	0	0	0	0	0		7.91758
Larp4b	4.29e-07	4.873e-07	9.8427	7.8348	7.5554	7.8015	6.55	0	0	0	0	0		7.91688
Pdia6	3.853e-09	5.337e-09	11.175	11.381	11.203	11.319	11.19	3.1699	4.3716	2.6323	3.4594	3.0531		7.91634
Pdia6	3.853e-09	5.337e-09	11.175	11.381	11.203	11.319	11.19	3.1699	4.3716	2.6323	3.4594	3.0531		7.91634
Katnb1	1.301e-15	2.438e-14	7.7833	8.0639	7.8906	7.8997	7.9431	0	0	0	0	0		7.91612
Ptpmt1	1.661e-13	9.931e-13	7.9045	8.1589	8.0301	7.7655	7.7074	0	0	0	0	0		7.91328
Ckmt2	2.184e-10	4.032e-10	11.671	11.893	12.072	12.03	11.591	3.8278	3.9069	4.3074	3.3363	4.3147		7.91278
Fmnl1	4.567e-11	1.028e-10	8.1724	8.2007	7.7115	8.1303	7.3416	0	0	0	0	0		7.9113
Kalrn	1.186e-08	1.524e-08	7.8605	8.6319	8.0821	8.3188	6.6582	0	0	0	0	0		7.9103
Ggt7	1.036e-11	2.997e-11	8.0682	8.1849	7.3776	7.9413	7.9721	0	0	0	0	0		7.90882
Diaph2	1.018e-11	2.949e-11	7.8304	7.8125	7.6132	7.8474	8.4384	0	0	0	0	0		7.90838
Mcf2l	2.21e-10	4.065e-10	7.4421	8.5224	8.0547	8.058	7.4619	0	0	0	0	0		7.90782
Nav3	1.821e-12	6.964e-12	8.208	8.0693	7.7905	7.9111	7.5592	0	0	0	0	0		7.90762
Paip2	1.497e-09	2.242e-09	7.89	8.3654	8.1221	8.2422	6.9141	0	0	0	0	0		7.90676
Kcnd3	9.037e-13	3.839e-12	7.9472	7.7197	7.8144	7.7549	8.2845	0	0	0	0	0		7.90414
Ube2h	2.337e-08	2.904e-08	8.5507	7.2937	7.3001	7.3478	9.0204	0	0	0	0	0		7.90254
Dhrs7	9.027e-13	3.838e-12	7.8405	7.6525	7.8367	7.8997	8.2766	0	0	0	0	0		7.9012
Chn1	1.223e-13	7.861e-13	7.6745	7.7886	8.0922	7.8839	8.065	0	0	0	0	0		7.90084
Hdhd2	3.425e-10	5.955e-10	10.978	11.604	11.49	11.617	10.985	3.0531	3.7442	3.2479	3.2479	3.8777		7.90064
Fkbp15	2.112e-11	5.409e-11	7.7622	8.2733	8.0224	8.0509	7.3828	0	0	0	0	0		7.89832
Isoc1	1.505e-10	2.911e-10	8.1764	8.1339	7.9617	8.0859	7.1324	0	0	0	0	0		7.89806
Fbl	1.973e-06	2.186e-06	8.7758	9.0949	9.0298	9.2245	8.5457	2.6554	0	2.5607	0	0		7.89092
Usp31	1.555e-10	2.988e-10	8.2729	8.278	7.7748	7.9087	7.2172	0	0	0	0	0		7.89032
Scpep1	1.014e-09	1.575e-09	8.2119	8.2974	7.9583	8.052	6.9296	0	0	0	0	0		7.88984
Upf1	5.159e-06	5.641e-06	10.712	10.984	10.827	10.892	10.723	3.7866	3.5236	3.7442	0	3.6439		7.88794
Macrod1	1.026e-11	2.969e-11	7.7569	8.3527	7.8814	7.9437	7.5014	0	0	0	0	0		7.88722
Efnb1	4.315e-12	1.415e-11	7.799	8.107	8.137	7.9301	7.4512	0	0	0	0	0		7.88486
Trim31	4.392e-14	3.464e-13	7.9658	7.6575	7.831	7.8918	8.0779	0	0	0	0	0		7.8848
Ankrd29	1.873e-11	4.92e-11	8.0112	8.2163	7.7859	8.052	7.3514	0	0	0	0	0		7.88336
ATP8	1.224e-10	2.426e-10	10.551	10.812	10.681	10.672	10.32	2.9449	2.6554	2.1043	2.8278	3.0875		7.88322
Cox7b	7.451e-12	2.267e-11	8.2766	7.8157	7.7039	7.5306	8.0827	0	0	0	0	0		7.8819
Pir	6.553e-12	2.025e-11	8.1148	8.0757	7.8869	7.9472	7.3837	0	0	0	0	0		7.88166
Cdkn1b	2.975e-13	1.616e-12	8.1724	7.7662	7.6402	7.9301	7.8954	0	0	0	0	0		7.88086
Srrm1	6.715e-12	2.07e-11	7.6051	8.2016	8.0949	7.9571	7.5407	0	0	0	0	0		7.87988
Ehd2	4.071e-09	5.613e-09	8.9236	7.9565	7.7218	7.6554	7.1313	0	0	0	0	0		7.87772
Edil3	2.841e-13	1.554e-12	8.0067	8.1033	7.6949	7.9337	7.6482	0	0	0	0	0		7.87736
Chchd1	1.369e-13	8.521e-13	7.9236	8.0991	7.949	7.7977	7.6169	0	0	0	0	0		7.87726
Commd3	4.278e-14	3.406e-13	8.0246	7.9554	7.9236	7.8605	7.6177	0	0	0	0	0		7.87636
Selenoo	2.122e-15	3.483e-14	7.7886	7.9864	7.7787	7.996	7.8278	0	0	0	0	0		7.8755
Selenof	4.062e-14	3.273e-13	7.8041	8.0482	7.8906	7.979	7.6511	0	0	0	0	0		7.8746
Ppp1r37	4.225e-11	9.655e-11	7.6632	8.2826	8.097	7.9801	7.3487	0	0	0	0	0		7.87432
Pym1	8.974e-12	2.651e-11	8.2503	7.9921	7.8086	7.9009	7.4145	0	0	0	0	0		7.87328
Rnf148	1.3e-09	1.975e-09	7.2724	7.6596	7.6717	8.7908	7.9495	0	0	0	0	0		7.8688
Pde6d	8.181e-22	2.162e-18	7.8605	7.8542	7.8623	7.8623	7.8972	0	0	0	0	0		7.8673
Prrc2b	7.38e-12	2.248e-11	8.1684	8.0811	7.6453	7.9704	7.4709	0	0	0	0	0		7.86722
Nop10	1.087e-09	1.677e-09	7.9932	8.3452	7.8297	8.2279	6.939	0	0	0	0	0		7.867
Pex5	2.47e-12	8.862e-12	7.5006	7.7381	8.0526	7.8802	8.1553	0	0	0	0	0		7.86536
Mrps10	3.463e-12	1.181e-11	8.0112	8.0901	7.9248	7.8997	7.4009	0	0	0	0	0		7.86534
Fdx1	1.867e-10	3.522e-10	7.9796	8.3083	8.0406	7.8753	7.121	0	0	0	0	0		7.86496
Vps4b	5.908e-12	1.85e-11	7.6169	8.0196	8.2644	7.8542	7.5668	0	0	0	0	0		7.86438
Arhgef9	3.127e-13	1.674e-12	7.9378	7.8093	7.6837	7.7115	8.1734	0	0	0	0	0		7.86314
Mmaa	1.069e-10	2.151e-10	7.8654	8.1918	8.1298	7.9658	7.1558	0	0	0	0	0		7.86172
Dtx3	3.297e-07	3.766e-07	8.4216	8.6935	8.4818	8.5006	7.5835	0	0	2.3785	0	0		7.8605
Naa35	1.806e-14	1.672e-13	8.0768	7.8954	7.7688	7.8138	7.7197	0	0	0	0	0		7.8549
Smad4	1.403e-13	8.684e-13	7.73	7.8954	8.0656	7.9559	7.6125	0	0	0	0	0		7.85188
Peli2	5.069e-10	8.443e-10	8.7029	7.6731	7.7748	7.7515	7.3567	0	0	0	0	0		7.8518
Trip11	3.735e-11	8.739e-11	8.1189	8.1324	7.719	8.0135	7.2733	0	0	0	0	0		7.85142
Dnajb5	5.572e-16	1.345e-14	7.9236	7.8486	7.853	7.7032	7.926	0	0	0	0	0		7.85088
Xrn1	1.201e-10	2.386e-10	8.3456	8.1664	7.6575	7.8003	7.2817	0	0	0	0	0		7.8503
Swi5	1.205e-08	1.546e-08	8.7863	8.0928	7.8253	7.8411	6.6991	0	0	0	0	0		7.84892
Map4	2.821e-11	6.921e-11	8.4384	7.879	7.7218	7.5569	7.6431	0	0	0	0	0		7.84784
Lamc1	1.181e-11	3.339e-11	11.145	11.286	11.285	11.237	10.968	2.9819	3.5729	3.6781	3.2016	3.2479		7.84772
Paf1	3.373e-10	5.87e-10	8.0768	8.1416	7.7957	8.1859	7.0345	0	0	0	0	0		7.8469
Aspscr1	7.652e-12	2.312e-11	7.6802	8.1339	7.5842	8.2046	7.6286	0	0	0	0	0		7.8463
Gm45927	1.89e-14	1.725e-13	7.975	7.9378	7.7589	7.9159	7.6424	0	0	0	0	0		7.846
Nanp	1.945e-10	3.649e-10	7.5569	8.2279	7.9994	8.2269	7.2133	0	0	0	0	0		7.84488
Arsa	1.742e-10	3.309e-10	8.4586	7.8802	7.6162	7.9921	7.2752	0	0	0	0	0		7.84446
Mief1	1.469e-14	1.425e-13	7.7354	8.0656	7.8436	7.8436	7.7293	0	0	0	0	0		7.8435
Hddc2	4.858e-14	3.764e-13	7.6344	7.8202	7.9784	8.0185	7.7609	0	0	0	0	0		7.84248
Fam117b	8.369e-09	1.095e-08	8.683	7.9989	7.8144	8.0112	6.7032	0	0	0	0	0		7.84214
Hdac4	1.331e-13	8.346e-13	7.9284	7.9408	7.7702	8.009	7.5622	0	0	0	0	0		7.84212
Sorbs2	9.017e-13	3.838e-12	12.121	12.178	12.009	12.098	11.824	4.1538	4.3219	4.0704	4.0268	4.4594		7.83954
Endod1	8.392e-12	2.497e-11	7.799	8.139	7.6823	8.1334	7.4396	0	0	0	0	0		7.83866
Pam	2.603e-15	4.022e-14	7.8802	7.6802	7.8839	7.9646	7.782	0	0	0	0	0		7.83818
Rprd1b	4.945e-10	8.265e-10	7.8505	8.2896	7.9669	8.0938	6.9887	0	0	0	0	0		7.8379
Pcmtd1	1.292e-10	2.543e-10	8.3133	8.1365	7.8041	7.7204	7.2143	0	0	0	0	0		7.83772
Flnb	1.599e-11	4.323e-11	7.8041	8.0811	7.9571	8.052	7.2854	0	0	0	0	0		7.83594
Lims1	5.238e-13	2.517e-12	7.6914	7.9075	8.1096	7.9033	7.5615	0	0	0	0	0		7.83466
Sacs	1.269e-13	8.052e-13	7.5446	7.9015	8.0274	7.866	7.8291	0	0	0	0	0		7.83372
Rogdi	1.522e-12	6.019e-12	7.8202	7.5729	7.6589	7.8592	8.2031	0	0	0	0	0		7.82286
Ndufb2	3.074e-10	5.416e-10	7.8605	8.278	7.7053	8.1649	7.0811	0	0	0	0	0		7.81796
3110040N11Rik	9.438e-10	1.479e-09	7.719	8.1441	7.8734	8.3906	6.9623	0	0	0	0	0		7.81788
Rhof	7.637e-14	5.432e-13	7.719	8.0731	7.8449	7.8221	7.6294	0	0	0	0	0		7.8177
Pex14	4.686e-12	1.525e-11	8.1396	7.9652	7.8144	7.78	7.388	0	0	0	0	0		7.81744
Mocs3	3.036e-13	1.637e-12	7.9141	7.8716	7.9129	7.9159	7.4627	0	0	0	0	0		7.81544
Nacad	4.424e-11	1.002e-10	7.9519	8.1824	7.7115	7.9767	7.2192	0	0	0	0	0		7.80834
Psmd1	6.155e-10	1.004e-09	11.469	11.402	11.403	11.348	11.58	3.6206	3.8074	4.3854	3.1043	3.2479		7.80728
Ankrd34a	2.856e-09	4.049e-09	7.8851	8.3206	7.9224	8.1584	6.7361	0	0	0	0	0		7.80452
Cpne8	5.618e-09	7.557e-09	8.5228	7.1928	7.3663	7.3759	8.5641	0	0	0	0	0		7.80438
Cltc	7.433e-08	8.874e-08	7.4749	8.5322	8.4204	8.3015	6.2928	0	0	0	0	0		7.80436
Kmo	1.729e-10	3.289e-10	7.2798	7.8894	8.2133	8.2148	7.4187	0	0	0	0	0		7.8032
Mtus2	1.185e-15	2.294e-14	7.8851	7.8467	7.8654	7.6446	7.7649	0	0	0	0	0		7.80134
Ccdc90b	3.841e-17	2.059e-15	7.7938	7.7905	7.7428	7.7602	7.9075	0	0	0	0	0		7.79896
Agtpbp1	6.371e-13	2.945e-12	7.7462	7.9664	7.8654	7.9658	7.4454	0	0	0	0	0		7.79784
Nop58	8.528e-13	3.679e-12	7.9658	7.6525	7.6199	7.6417	8.109	0	0	0	0	0		7.79778
Agrn	3.008e-11	7.306e-11	7.8151	8.1824	7.8041	7.9484	7.2298	0	0	0	0	0		7.79596
Pptc7	5.24e-10	8.691e-10	7.8704	8.255	7.7957	8.0996	6.9577	0	0	0	0	0		7.79568
Aamp	1.931e-13	1.116e-12	7.6689	7.8574	7.8784	8.0218	7.5477	0	0	0	0	0		7.79484
OTTMUSWSBG00059279	2.963e-14	2.502e-13	8.0246	7.782	7.6611	7.6717	7.8291	0	0	0	0	0		7.7937
Tmeff2	5.06e-11	1.122e-10	7.7569	7.2715	7.9027	7.7231	8.3142	0	0	0	0	0		7.79368
Rps6kc1	1.521e-13	9.238e-13	7.6402	7.9218	7.7469	8.029	7.6103	0	0	0	0	0		7.78964
Mrpl20	1.26e-14	1.275e-13	7.646	7.7245	7.8636	7.7306	7.9807	0	0	0	0	0		7.78908
Ap3s1	6.426e-14	4.726e-13	7.5992	8.0207	7.7957	7.8449	7.676	0	0	0	0	0		7.7873
Ubxn1	4.094e-10	6.978e-10	8.445	7.9015	7.7245	7.784	7.0811	0	0	0	0	0		7.78722
Mtch2	6.069e-06	6.621e-06	10.271	10.012	10.237	10.084	11.289	2.3219	3.2327	3.2928	0	4.1127		7.78658
Adgrb2	2.845e-15	4.296e-14	7.6051	7.7983	7.9081	7.7964	7.8093	0	0	0	0	0		7.78344
Myh1	7.255e-09	9.554e-09	8.4619	8.1513	7.7918	7.8857	6.6221	0	0	0	0	0		7.78256
Myh2	7.255e-09	9.554e-09	8.4619	8.1513	7.7918	7.8857	6.6221	0	0	0	0	0		7.78256
Myh8	7.255e-09	9.554e-09	8.4619	8.1513	7.7918	7.8857	6.6221	0	0	0	0	0		7.78256
Cnpy3	2.275e-11	5.76e-11	7.73	8.08	7.69	8.1205	7.2882	0	0	0	0	0		7.78174
Ythdf1	1.857e-13	1.083e-12	7.9378	7.7951	7.9542	7.7101	7.5022	0	0	0	0	0		7.77988
Nwd2	7.675e-15	8.775e-14	7.9472	7.7482	7.5999	7.7912	7.8009	0	0	0	0	0		7.77748
Rpn2	5.236e-07	5.921e-07	8.6199	8.5883	8.4923	8.6493	8.8464	0	0	1.8875	0	2.433		7.77514
Adcyap1r1	3.686e-11	8.659e-11	7.7728	8.1764	7.6575	8.0101	7.2403	0	0	0	0	0		7.77142
Folh1	1.468e-11	4.019e-11	7.3461	7.9664	8.0634	7.9583	7.5062	0	0	0	0	0		7.76808
Sorbs2	9.444e-13	3.99e-12	12.056	12.093	11.924	12.022	11.752	4.1538	4.3219	4.0704	4.0268	4.4594		7.76294
Polb	3.112e-10	5.475e-10	7.89	8.1148	7.8157	8.0406	6.9507	0	0	0	0	0		7.76236
Rps20	3.945e-10	6.749e-10	12.225	12.054	11.96	11.956	11.513	4.1293	4.585	4.4529	4.2016	3.5361		7.76062
Fabp5	1.735e-10	3.296e-10	13.33	12.854	12.767	12.736	13.296	5.0575	5.1898	4.8278	5.466	5.641		7.76018
Lgi2	1.428e-14	1.397e-13	7.9093	7.6257	7.8015	7.8505	7.6125	0	0	0	0	0		7.7599
Mtpap	9.92e-16	2.016e-14	7.611	7.8189	7.7886	7.7204	7.8542	0	0	0	0	0		7.75862
Usp11	6.593e-15	7.874e-14	7.6051	7.7562	7.7129	7.7741	7.9413	0	0	0	0	0		7.75792
Utrn	1.359e-13	8.481e-13	7.7136	7.9989	7.6417	7.8722	7.5584	0	0	0	0	0		7.75696
Unc5a	1.297e-13	8.18e-13	7.4487	7.8697	7.7774	7.8099	7.8753	0	0	0	0	0		7.7562
Diras1	6.722e-15	7.948e-14	7.6575	7.9594	7.7156	7.7046	7.6879	0	0	0	0	0		7.745
Strn	7.927e-10	1.262e-09	11.399	11.379	11.255	11.379	10.673	3.2928	3.4983	3.4854	4.1293	2.9635		7.74314
Fgb	1.306e-10	2.568e-10	7.4619	8.1689	7.9796	7.946	7.1548	0	0	0	0	0		7.74224
Ndrg1	3.651e-10	6.302e-10	8.0112	8.1784	7.717	7.8486	6.9449	0	0	0	0	0		7.74002
Mad1l1	1.06e-11	3.052e-11	7.6632	8.0585	7.6928	7.9932	7.2919	0	0	0	0	0		7.73992
Rps8	1.923e-07	2.229e-07	11.92	11.934	11.968	11.878	12.372	4.6554	5.079	4.6206	2.4594	4.5607		7.73938
Camkk2	3.164e-06	3.482e-06	10.51	10.343	10.265	10.237	10.472	3.6668	3.6206	2.9819	0	2.8679		7.73796
Ndufaf7	3.521e-10	6.103e-10	8.284	8.0821	7.5954	7.6625	7.0607	0	0	0	0	0		7.73694
Nectin3	1.397e-12	5.577e-12	7.8753	7.5196	7.6118	7.5902	8.0859	0	0	0	0	0		7.73656
Tnrc6b	1.414e-10	2.754e-10	7.7515	8.2384	7.8086	7.8074	7.0629	0	0	0	0	0		7.73376
Ptprf	1.86e-09	2.723e-09	7.9796	8.1883	7.7846	7.9949	6.7184	0	0	0	0	0		7.73316
Lclat1	2.618e-14	2.232e-13	7.9425	7.8253	7.6132	7.6402	7.6446	0	0	0	0	0		7.73316
Zc3h4	5.055e-13	2.455e-12	7.8354	7.9583	7.7279	7.7306	7.3966	0	0	0	0	0		7.72976
Nhsl2	1.894e-10	3.565e-10	7.6575	7.8697	7.7872	8.2719	7.0607	0	0	0	0	0		7.7294
Sorcs1	7.596e-14	5.41e-13	7.7728	7.9117	7.7039	7.7827	7.4652	0	0	0	0	0		7.72726
Capn1	3.467e-16	9.624e-15	7.8704	7.7115	7.6914	7.7087	7.6511	0	0	0	0	0		7.72662
Oscp1	2.947e-12	1.028e-11	7.4814	7.9454	7.7905	7.9864	7.4246	0	0	0	0	0		7.72566
Lman1	5.851e-14	4.405e-13	7.4749	7.7394	7.6668	7.8234	7.8857	0	0	0	0	0		7.71804
Atrx	4.929e-15	6.459e-14	7.8851	7.7787	7.5925	7.6879	7.6388	0	0	0	0	0		7.7166
Casc4	2.148e-12	7.939e-12	7.8505	7.7347	7.3811	7.5729	8.0296	0	0	0	0	0		7.71376
Pak7	1.696e-11	4.524e-11	7.7675	8.0224	7.717	7.8839	7.1739	0	0	0	0	0		7.71294
Cnot11	2.539e-11	6.326e-11	7.2114	7.6439	8.0056	7.6489	8.0547	0	0	0	0	0		7.7129
Csmd2	2.628e-12	9.353e-12	7.2574	7.8741	7.8392	7.7814	7.8028	0	0	0	0	0		7.71098
Pmpca	3.899e-14	3.156e-13	7.8151	7.5577	7.6963	7.5759	7.9075	0	0	0	0	0		7.7105
Ctrl	5.043e-10	8.41e-10	8.4878	7.6439	7.6575	7.6388	7.1085	0	0	0	0	0		7.7073
Timm50	1.674e-13	9.997e-13	7.7886	7.5668	7.8202	7.4627	7.8875	0	0	0	0	0		7.70516
Cmc1	1.012e-12	4.222e-12	7.8753	7.8297	7.7245	7.7715	7.3092	0	0	0	0	0		7.70204
Rpl36	1.022e-13	6.758e-13	7.6575	7.9147	7.6417	7.817	7.4741	0	0	0	0	0		7.701
Pnpla8	3.443e-11	8.166e-11	7.8151	7.5423	7.4128	7.4652	8.2677	0	0	0	0	0		7.70062
Igkv8-30	1.607e-12	6.277e-12	7.6745	7.7629	7.8265	7.9313	7.3038	0	0	0	0	0		7.6998
Matk	5.511e-15	6.952e-14	7.7354	7.8297	7.6402	7.7576	7.5243	0	0	0	0	0		7.69744
Chrm3	5.765e-13	2.716e-12	7.6632	7.6344	7.6781	7.4668	8.0438	0	0	0	0	0		7.69726
Rprd2	2.014e-12	7.543e-12	7.6689	7.9989	7.7156	7.7827	7.3165	0	0	0	0	0		7.69652
Gpcpd1	6.685e-11	1.423e-10	7.0811	8.0493	7.7279	7.9801	7.6424	0	0	0	0	0		7.69616
Tma7	6.473e-10	1.049e-09	7.8555	8.0747	7.929	7.8183	6.8009	0	0	0	0	0		7.69568
Rin1	8.753e-13	3.764e-12	7.6632	8.0045	7.6668	7.7562	7.3837	0	0	0	0	0		7.69488
Wwc2	2.013e-11	5.215e-11	7.8997	7.7741	7.824	7.8636	7.1106	0	0	0	0	0		7.6944
Pde12	4.327e-13	2.17e-12	7.5006	7.879	7.824	7.8074	7.4396	0	0	0	0	0		7.69012
Cd2ap	3.554e-09	4.947e-09	7.8802	8.2422	7.799	7.926	6.6014	0	0	0	0	0		7.68976
rps14	9.11e-12	2.684e-11	12.231	12.049	11.988	11.999	11.809	4.3147	4.3576	4.591	3.9069	4.4594		7.68928
Ubtf	2.238e-15	3.629e-14	7.7886	7.5984	7.7918	7.6997	7.5638	0	0	0	0	0		7.68846
Mpc2	2.545e-09	3.643e-09	7.89	7.2317	7.3255	7.3174	8.6604	0	0	0	0	0		7.685
Atp2c1	1.064e-11	3.064e-11	7.2798	7.7609	7.6279	7.6294	8.1246	0	0	0	0	0		7.68452
L2hgdh	6.616e-10	1.07e-09	7.6169	8.1824	7.6081	8.1075	6.9069	0	0	0	0	0		7.68436
Abcd2	2.672e-11	6.614e-11	7.8802	8.0493	7.5887	7.7401	7.1538	0	0	0	0	0		7.68242
Cdc5l	9.63e-12	2.813e-11	7.8041	7.9641	7.6213	7.8183	7.1888	0	0	0	0	0		7.67932
Nif3l1	5.425e-13	2.593e-12	7.719	7.9796	7.6532	7.6431	7.394	0	0	0	0	0		7.67778
Ppm1f	2.615e-17	1.619e-15	7.6632	7.7629	7.6081	7.6337	7.697	0	0	0	0	0		7.67298
Cpt1c	1.59e-10	3.047e-10	7.7136	8.0318	7.676	7.9704	6.9612	0	0	0	0	0		7.6706
Mfsd4a	3.488e-10	6.052e-10	7.7781	7.4479	7.1719	7.5141	8.4111	0	0	0	0	0		7.66462
Ccz1	7.213e-13	3.239e-12	7.4085	7.5984	7.6851	7.611	8.0023	0	0	0	0	0		7.66106
Camk2d	1.833e-08	2.3e-08	8.6717	7.9218	7.4446	7.7259	6.5407	0	0	0	0	0		7.66094
Camkk2	3.408e-06	3.747e-06	10.429	10.265	10.207	10.156	10.379	3.6668	3.6206	2.9819	0	2.8679		7.65976
Edc4	1.695e-12	6.584e-12	7.646	7.4806	7.5181	7.5699	8.0736	0	0	0	0	0		7.65764
Ccdc127	2.539e-18	3.398e-16	7.6228	7.7266	7.6228	7.6717	7.6301	0	0	0	0	0		7.6548
Jph1	1.717e-15	3.005e-14	7.6286	7.56	7.7931	7.719	7.5638	0	0	0	0	0		7.6529
Rab22a	6.802e-14	4.949e-13	7.3811	7.808	7.6668	7.6984	7.7101	0	0	0	0	0		7.65288
Trio	2.341e-09	3.373e-09	11.597	11.466	11.313	11.331	11.405	3.9819	3.7225	4.278	4.079	2.7866		7.6528
Nup153	3.033e-12	1.053e-11	7.8253	7.8486	7.7428	7.625	7.2163	0	0	0	0	0		7.6516
Atp2b2	1.514e-11	4.128e-11	15.393	15.278	15.25	15.114	15.819	7.4943	7.7334	7.6921	7.7211	7.9606		7.6505
NOGENE	5.042e-14	3.862e-13	7.8654	7.4782	7.7428	7.5515	7.6095	0	0	0	0	0		7.64948
Fam171a1	2.516e-12	9.004e-12	7.6286	7.9378	7.6639	7.7642	7.2517	0	0	0	0	0		7.64924
Armcx3	3.884e-12	1.297e-11	7.2114	7.8697	7.7556	7.8183	7.5842	0	0	0	0	0		7.64784
Ddhd2	2.662e-12	9.45e-12	7.339	7.8881	7.6589	7.9009	7.4446	0	0	0	0	0		7.6463
Kcnd2	2.828e-11	6.929e-11	7.8704	7.8759	7.3906	7.9147	7.1699	0	0	0	0	0		7.6443
Mlip	3.869e-09	5.358e-09	7.4487	8.255	7.7115	8.1344	6.6682	0	0	0	0	0		7.64356
Ube2q1	3.424e-13	1.793e-12	7.9612	7.563	7.4512	7.5515	7.6865	0	0	0	0	0		7.64268
Arl1	8.359e-16	1.825e-14	7.6575	7.6242	7.5251	7.6184	7.782	0	0	0	0	0		7.64144
Cacna2d2	8.431e-14	5.879e-13	7.6286	7.8316	7.5507	7.7655	7.4204	0	0	0	0	0		7.63936
Supt4h1a	6.86e-09	9.079e-09	7.6689	8.2279	7.7455	8.0612	6.4902	0	0	0	0	0		7.63874
Hcn2	7.734e-12	2.334e-11	7.5691	7.9738	7.6359	7.8112	7.2026	0	0	0	0	0		7.63852
Cwc15	1.279e-10	2.521e-10	8.3456	7.5353	7.2715	7.4578	7.582	0	0	0	0	0		7.63844
Rnf123	1.259e-13	8.007e-13	7.3811	7.6872	7.6213	7.6323	7.8648	0	0	0	0	0		7.63734
Rbsn	1.912e-14	1.734e-13	7.5006	7.6991	7.8183	7.6625	7.499	0	0	0	0	0		7.6359
Mrps2	1.556e-14	1.498e-13	7.8099	7.4959	7.6668	7.5054	7.6935	0	0	0	0	0		7.6343
Cryzl2	1.129e-14	1.161e-13	7.5507	7.7695	7.7428	7.6431	7.4652	0	0	0	0	0		7.63426
Tmem63b	1.421e-10	2.763e-10	7.7462	7.3558	7.2546	7.5054	8.3033	0	0	0	0	0		7.63306
Ubxn2b	1.463e-12	5.808e-12	7.8202	7.6073	7.7245	7.7675	7.2336	0	0	0	0	0		7.63062
Naca	4.096e-09	5.642e-09	11.62	10.729	10.787	10.72	11.752	3.0179	3.2327	3.5969	3.6554	3.9635		7.62832
Anxa7	1.371e-12	5.502e-12	11.215	11.375	11.235	11.34	11.033	3.9165	3.5236	3.6668	3.4195	3.5361		7.6271
Tmx3	1.972e-10	3.69e-10	7.4017	7.4338	7.4246	7.4684	8.4034	0	0	0	0	0		7.62638
Mtmr7	1.641e-13	9.844e-13	7.6286	7.4068	7.6081	7.5645	7.9015	0	0	0	0	0		7.6219
Ppm1k	3.301e-11	7.888e-11	7.8948	7.929	7.6184	7.6044	7.0618	0	0	0	0	0		7.62168
Plcd1	6.489e-15	7.787e-14	7.4619	7.7918	7.594	7.5932	7.6532	0	0	0	0	0		7.61882
Ube2g1	7.854e-12	2.364e-11	7.7886	7.7197	7.6668	7.8086	7.1096	0	0	0	0	0		7.61866
Syt17	1.832e-13	1.071e-12	7.6402	7.6221	7.6066	7.866	7.3549	0	0	0	0	0		7.61796
Tpd52l1	5.039e-10	8.407e-10	7.5691	8.0356	7.6417	8.0135	6.8291	0	0	0	0	0		7.6178
Gatm	2.449e-11	6.128e-11	7.4017	7.9932	7.6611	7.8592	7.1709	0	0	0	0	0		7.61722
Cstf1	2.167e-08	2.697e-08	7.719	8.1148	7.9744	8.0323	6.2346	0	0	0	0	0		7.61502
As3mt	3.937e-12	1.31e-11	7.8354	7.7609	7.6081	7.7074	7.1629	0	0	0	0	0		7.61494
Sh3gl1	7.817e-12	2.354e-11	12.488	12.76	12.491	12.627	12.111	5.0747	4.7279	5.0224	4.8329	4.7495		7.61392
Man2c1	1.956e-10	3.666e-10	8.0246	7.0157	7.6914	7.3327	7.9893	0	0	0	0	0		7.61074
Clic1	3.705e-11	8.684e-11	7.0201	7.9057	7.7886	7.7702	7.56	0	0	0	0	0		7.60892
Fkbp15	1.31e-11	3.635e-11	7.4355	7.9337	7.7067	7.8003	7.1619	0	0	0	0	0		7.60762
Pdia6	5.09e-09	6.897e-09	10.879	11.009	10.872	10.958	10.989	3.1699	4.3716	2.6323	3.4594	3.0531		7.60414
Spag9	1.098e-11	3.145e-11	11.284	11.212	11.142	11.088	11.187	3.1043	3.8074	3.5361	3.6206	3.8278		7.60336
Smarca5	3.97e-12	1.32e-11	8.0422	7.633	7.4553	7.5322	7.354	0	0	0	0	0		7.60334
Dock10	2.673e-10	4.79e-10	7.5691	7.2479	7.5149	7.3102	8.372	0	0	0	0	0		7.60282
Thoc3	1.34e-11	3.711e-11	7.6169	7.7996	7.7542	7.7787	7.0639	0	0	0	0	0		7.60266
Pdcd10	3.712e-06	4.077e-06	9.3474	9.3848	9.1508	9.2928	9.0827	0	2.5361	2.9819	2.7442	0		7.59926
Pgam2	4.364e-12	1.43e-11	13.097	13.412	13.28	13.447	12.993	5.4594	5.7629	5.4854	5.6352	5.89		7.59922
Mrps18b	2.064e-11	5.323e-11	7.5507	7.7662	7.7279	7.893	7.0575	0	0	0	0	0		7.59906
Smndc1	3.531e-11	8.35e-11	7.4355	7.9117	7.7129	7.8636	7.0693	0	0	0	0	0		7.5986
Gpsm1	7.897e-12	2.373e-11	7.7136	7.8253	7.5999	7.7435	7.0991	0	0	0	0	0		7.59628
Tpmt	1.503e-11	4.106e-11	7.7025	7.8517	7.5902	7.7702	7.0607	0	0	0	0	0		7.59506
Rpl7a	1.207e-10	2.396e-10	12.415	12.593	12.448	12.41	12.399	4.3923	5.1127	4.9542	4.5046	5.3291		7.59442
Idi1	1.111e-05	1.206e-05	9.4666	9.5759	9.4348	9.4977	9.4963	3.1375	2.8278	3.5607	0	0		7.58906
Nap1l5	1.778e-09	2.612e-09	7.4684	7.9779	7.987	7.8673	6.6395	0	0	0	0	0		7.58802
Smarce1	1.536e-10	2.958e-10	7.7886	7.8048	7.7218	7.7715	6.8367	0	0	0	0	0		7.58468
Jph4	4.919e-10	8.229e-10	7.3246	8.1059	7.6823	7.9171	6.89	0	0	0	0	0		7.58398
Igsf21	1.04e-14	1.098e-13	7.6169	7.4782	7.5204	7.5125	7.7892	0	0	0	0	0		7.58344
Sdr39u1	9.87e-12	2.868e-11	8.0509	7.5804	7.4279	7.6029	7.2517	0	0	0	0	0		7.58276
Nkiras1	3.576e-12	1.211e-11	7.5752	7.8623	7.6653	7.6511	7.1538	0	0	0	0	0		7.58154
Jam2	1.965e-10	3.68e-10	6.8099	7.7245	7.8183	7.7951	7.7542	0	0	0	0	0		7.5804
Ube2r2	4.662e-11	1.046e-10	7.7025	7.8329	7.5554	7.8411	6.9692	0	0	0	0	0		7.58022
Nbas	5.493e-13	2.618e-12	7.611	7.7951	7.5789	7.6689	7.2394	0	0	0	0	0		7.57866
Phlda1	5.542e-11	1.214e-10	8.0112	7.6021	7.6199	7.6646	6.9898	0	0	0	0	0		7.57752
Itga1	2.117e-10	3.928e-10	7.6802	7.8486	7.7556	7.7912	6.8035	0	0	0	0	0		7.57582
Gad2	1.248e-09	1.901e-09	10.531	10.692	10.461	10.54	11.042	3.0179	3.3785	2.6323	2.6088	3.7549		7.57472
Tpp1	1.7e-11	4.531e-11	7.7569	7.4545	7.2085	7.4263	8.0218	0	0	0	0	0		7.5736
Cpeb3	5.014e-13	2.442e-12	7.7025	7.4068	7.4043	7.866	7.4822	0	0	0	0	0		7.57236
Gprasp1	5.685e-12	1.787e-11	7.339	7.9027	7.6872	7.6893	7.2317	0	0	0	0	0		7.56998
Fam120c	1.688e-11	4.506e-11	7.7354	7.3183	7.4421	7.3047	8.0444	0	0	0	0	0		7.56898
Ppp1r3g	2.436e-11	6.106e-11	7.8151	7.8125	7.4765	7.6956	7.0246	0	0	0	0	0		7.56486
Tmem33	2.048e-12	7.635e-12	7.4943	7.5102	7.3056	7.5407	7.9664	0	0	0	0	0		7.56344
Araf	1.363e-09	2.06e-09	8.1844	7.7951	7.5046	7.6073	6.6893	0	0	0	0	0		7.55614
Txndc9	1.739e-13	1.028e-12	7.6858	7.7025	7.6308	7.4733	7.2789	0	0	0	0	0		7.55426
Nomo1	3.714e-06	4.078e-06	9.3188	9.1515	9.1143	9.1324	8.996	2.1375	0	3.263	0	2.5607		7.55036
Gspt1	2.392e-13	1.338e-12	11.958	11.859	11.778	11.792	11.927	4.3001	4.1293	4.1699	4.5046	4.4594		7.55014
Col1a2	3.323e-10	5.796e-10	8.2877	7.4136	7.3646	7.0564	7.6177	0	0	0	0	0		7.548
Ilk	4.205e-14	3.362e-13	7.4553	7.6823	7.7039	7.5306	7.3531	0	0	0	0	0		7.54504
Slc4a1	3.158e-17	1.834e-15	7.4814	7.5446	7.5706	7.6323	7.4959	0	0	0	0	0		7.54496
Nuak2	4.537e-07	5.146e-07	8.7139	6.4479	6.9093	6.7853	8.858	0	0	0	0	0		7.54288
Agpat3	8.911e-10	1.403e-09	7.5569	7.1957	7.4586	7.0928	8.4098	0	0	0	0	0		7.54276
Abcb1b	4.427e-12	1.446e-11	7.7245	7.4212	7.3602	7.2845	7.9141	0	0	0	0	0		7.5409
Nrip2	2.171e-11	5.543e-11	7.7728	7.6858	7.5118	7.7401	6.9841	0	0	0	0	0		7.53892
Tusc3	1.363e-11	3.771e-11	7.5384	7.4627	7.3092	7.3219	8.0612	0	0	0	0	0		7.53868
Uqcc2	1.42e-10	2.763e-10	7.9331	7.9159	7.499	7.4102	6.9343	0	0	0	0	0		7.5385
Vps28	7.497e-12	2.276e-11	7.6228	7.7708	7.6162	7.6388	7.04	0	0	0	0	0		7.53772
Cdh8	1.99e-12	7.468e-12	7.7462	7.5744	7.6036	7.6373	7.12	0	0	0	0	0		7.5363
Rangap1	6.037e-10	9.869e-10	11.641	11.547	11.503	11.478	11.392	4.3923	3.8074	4.1859	3.2016	4.2928		7.5362
Cdh10	7.264e-12	2.218e-11	7.6575	7.2317	7.5078	7.3291	7.9507	0	0	0	0	0		7.53536
Sh3gl1	8.603e-12	2.55e-11	12.407	12.685	12.408	12.55	12.034	5.0747	4.7279	5.0224	4.8329	4.7495		7.53532
Snx18	8.965e-13	3.83e-12	7.7025	7.7177	7.5306	7.5454	7.1749	0	0	0	0	0		7.53422
Jakmip2	1.244e-13	7.962e-13	7.2649	7.7149	7.5592	7.6323	7.499	0	0	0	0	0		7.53406
Polr2e	2.384e-09	3.433e-09	8.5507	7.1859	7.5094	7.3083	7.1137	0	0	0	0	0		7.5336
Champ1	1.16e-13	7.483e-13	7.339	7.5782	7.3837	7.7462	7.6177	0	0	0	0	0		7.53296
Ccdc85a	4.4e-15	5.947e-14	7.6632	7.3619	7.5267	7.511	7.5947	0	0	0	0	0		7.5315
Jup	2.187e-10	4.033e-10	7.8851	7.6611	7.0345	7.1043	7.9629	0	0	0	0	0		7.52958
Git2	2.118e-10	3.928e-10	7.7245	7.9045	7.5165	7.6823	6.7892	0	0	0	0	0		7.5234
Mmab	2.006e-09	2.918e-09	7.4421	7.9721	7.8215	7.8138	6.5546	0	0	0	0	0		7.52082
Nup205	1.239e-11	3.476e-11	7.029	7.4959	7.6795	7.5645	7.8342	0	0	0	0	0		7.52062
Nf2	1.76e-11	4.67e-11	7.5872	7.7529	7.5638	7.7163	6.9704	0	0	0	0	0		7.51812
Armc8	1.51e-15	2.715e-14	7.5446	7.5078	7.3776	7.507	7.6518	0	0	0	0	0		7.51776
Rpa1	4.279e-14	3.406e-13	7.73	7.4822	7.4586	7.3309	7.5827	0	0	0	0	0		7.51688
Chid1	7.274e-13	3.258e-12	7.7354	7.5022	7.4077	7.2269	7.708	0	0	0	0	0		7.51604
Sdhaf4	2.341e-13	1.319e-12	7.719	7.6788	7.3966	7.4975	7.2845	0	0	0	0	0		7.51528
Map3k5	9.868e-14	6.601e-13	7.5133	7.354	7.4	7.5259	7.78	0	0	0	0	0		7.51464
Sumo1	4.518e-13	2.244e-12	7.6858	7.6184	7.1977	7.6264	7.4305	0	0	0	0	0		7.51176
Lsm2	2.424e-12	8.757e-12	7.4288	7.7728	7.1385	7.6823	7.5267	0	0	0	0	0		7.50982
Adprhl2	3.18e-12	1.095e-11	7.563	7.7787	7.3966	7.6795	7.1303	0	0	0	0	0		7.50962
Aif1	3.945e-11	9.135e-11	7.3531	7.7609	7.7156	7.7529	6.9612	0	0	0	0	0		7.50874
Eprs	3.432e-13	1.794e-12	12.36	12.525	12.474	12.447	12.363	4.6781	4.9212	4.853	5.1538	5.0268		7.50722
Sdf2	1.693e-12	6.577e-12	7.708	7.452	7.6532	7.5744	7.1158	0	0	0	0	0		7.50068
Glg1	2.119e-10	3.929e-10	11.178	10.783	10.86	10.782	11.368	3.4594	3.7655	3.1859	3.1538	3.9165		7.49798
Osbpl10	5.694e-12	1.789e-11	7.8555	7.5157	7.1117	7.6044	7.3889	0	0	0	0	0		7.49524
Vps26a	1.073e-08	1.385e-08	7.611	6.9484	7.1137	7.1221	8.6805	0	0	0	0	0		7.49514
Ado	3.737e-12	1.257e-11	7.3246	7.6907	7.6103	7.7129	7.1179	0	0	0	0	0		7.49128
Slc12a6	1.388e-14	1.377e-13	7.4288	7.6475	7.4043	7.3611	7.6088	0	0	0	0	0		7.4901
Cntnap2	1.366e-09	2.064e-09	10.144	10.162	10.016	10.042	10.157	1.9635	2.4854	2.3219	3.3363	2.9635		7.49008
Lama4	4.078e-15	5.717e-14	7.6402	7.4822	7.4313	7.5423	7.3478	0	0	0	0	0		7.48876
Cacna1c	2.469e-14	2.135e-13	7.4814	7.3345	7.6575	7.3707	7.5917	0	0	0	0	0		7.48716
Tbrg4	5.134e-12	1.64e-11	7.0112	7.5368	7.6431	7.5804	7.6611	0	0	0	0	0		7.48652
Dnpep	5.725e-07	6.462e-07	9.196	9.5214	9.4498	9.487	9.3302	2.0704	0	1.9635	3.1538	2.3785		7.48364
Kbtbd2	5.387e-10	8.903e-10	8.1804	7.6872	7.2527	7.394	6.8924	0	0	0	0	0		7.48134
Mrpl2	4.066e-10	6.935e-10	6.9932	7.8348	7.7642	7.8605	6.946	0	0	0	0	0		7.47974
Agfg2	1.112e-09	1.711e-09	7.2192	8.0129	7.5999	7.8623	6.6977	0	0	0	0	0		7.4784
Ciao1	2.359e-11	5.941e-11	7.5752	7.6561	7.4902	7.7435	6.9165	0	0	0	0	0		7.4763
Robo1	8.564e-14	5.955e-13	7.3531	7.5157	7.6294	7.6169	7.2649	0	0	0	0	0		7.476
Mrpl13	2.203e-09	3.19e-09	7.5752	7.9875	7.5872	7.7401	6.4854	0	0	0	0	0		7.47508
Usp24	4.282e-15	5.908e-14	7.302	7.563	7.4446	7.4782	7.5789	0	0	0	0	0		7.47334
F8a	4.038e-13	2.048e-12	7.3318	7.3733	7.4822	7.3681	7.8093	0	0	0	0	0		7.47294
Glipr2	1.069e-10	2.151e-10	7.3742	7.8373	7.594	7.7204	6.8367	0	0	0	0	0		7.47252
Snrpb2	5.608e-15	7.041e-14	7.563	7.4998	7.4221	7.2983	7.5774	0	0	0	0	0		7.47212
Lsm3	1.891e-11	4.954e-11	7.697	7.7728	7.3584	7.5484	6.9784	0	0	0	0	0		7.471
Lrrc40	2.128e-10	3.944e-10	7.4288	7.9692	7.3255	7.7715	6.8555	0	0	0	0	0		7.4701
Trp53i11	2.707e-10	4.836e-10	7.302	7.1568	7.3776	7.2555	8.2479	0	0	0	0	0		7.46796
Enpp4	4.464e-09	6.104e-09	8.5196	7.3923	7.3567	7.2517	6.8189	0	0	0	0	0		7.46784
Prune2	7.082e-11	1.496e-10	7.611	7.4846	6.9425	7.3309	7.9635	0	0	0	0	0		7.4665
Fer	7.693e-11	1.607e-10	7.3531	7.8685	7.5492	7.6781	6.8777	0	0	0	0	0		7.46532
Lima1	1.201e-10	2.386e-10	7.6575	7.8467	7.3889	7.6213	6.8112	0	0	0	0	0		7.46512
Cwc27	2.294e-10	4.193e-10	7.6802	7.882	7.6081	7.3872	6.7536	0	0	0	0	0		7.46222
Arhgap35	9.525e-13	4.014e-12	10.799	10.983	10.87	10.865	10.713	3.263	3.1043	3.5361	3.5484	3.4725		7.46114
Recql4	4.28e-11	9.763e-11	7.6689	7.6575	7.676	7.4388	6.8567	0	0	0	0	0		7.45958
Ndufaf1	5.058e-13	2.455e-12	7.2346	7.3794	7.3602	7.5661	7.7495	0	0	0	0	0		7.45796
Asph	3.007e-13	1.625e-12	7.3742	7.347	7.4279	7.3478	7.7899	0	0	0	0	0		7.45736
Clvs1	6.974e-13	3.158e-12	7.4814	7.784	7.2612	7.4717	7.2845	0	0	0	0	0		7.45656
Sh3gl3	2.202e-10	4.052e-10	12.168	12.388	12.276	12.351	11.735	4.843	4.3363	4.9819	4.406	5.0875		7.45266
Gale	1.662e-11	4.45e-11	7.7938	7.6366	7.4388	7.4195	6.9658	0	0	0	0	0		7.4509
Hdhd3	5.689e-11	1.242e-10	7.5196	7.6942	7.4782	7.7293	6.8291	0	0	0	0	0		7.45008
C1ql3	6.083e-14	4.547e-13	7.4288	7.394	7.6575	7.5243	7.2422	0	0	0	0	0		7.44936
Syngr1	3.033e-11	7.353e-11	7.6632	7.5484	6.9658	7.2593	7.8041	0	0	0	0	0		7.44816
Brcc3	1.709e-11	4.553e-11	7.3742	7.6668	7.7515	7.487	6.9542	0	0	0	0	0		7.44674
Trim46	1.301e-13	8.185e-13	7.2649	7.4421	7.3872	7.4009	7.7231	0	0	0	0	0		7.44364
Specc1l	3.772e-11	8.81e-11	7.5446	7.5538	7.6132	7.6717	6.8329	0	0	0	0	0		7.44324
Abhd17b	1.403e-13	8.684e-13	7.3461	7.6539	7.2384	7.3846	7.5774	0	0	0	0	0		7.44008
Snx16	2.788e-12	9.808e-12	7.3531	7.611	7.3487	7.7616	7.1252	0	0	0	0	0		7.43992
Jam3	2.04e-12	7.618e-12	7.5446	7.3514	7.2489	7.2211	7.7944	0	0	0	0	0		7.43208
Tcf20	1.383e-12	5.54e-12	7.6228	7.5484	7.4043	7.511	7.0444	0	0	0	0	0		7.42618
Nrbf2	4.764e-14	3.703e-13	7.2192	7.4111	7.4943	7.6235	7.3768	0	0	0	0	0		7.42498
Usp32	7.577e-12	2.297e-11	7.7408	7.1739	7.1809	7.3138	7.7115	0	0	0	0	0		7.42418
Dab1	3.934e-12	1.31e-11	7.3165	7.5407	7.5638	7.6745	7.0224	0	0	0	0	0		7.42358
Vamp7	5.379e-13	2.573e-12	7.7408	7.438	7.1878	7.4085	7.3416	0	0	0	0	0		7.42334
Srsf5	1.85e-06	2.051e-06	9.8776	9.8438	9.7756	9.7973	9.0896	2.3219	2.7004	2.8679	0	3.3785		7.42304
Gabra4	1.833e-12	7.002e-12	7.0811	7.7163	7.3291	7.5006	7.4878	0	0	0	0	0		7.42298
Wbp4	1.011e-10	2.049e-10	7.4749	7.8924	7.3663	7.5584	6.8215	0	0	0	0	0		7.4227
Prodh	2.046e-13	1.177e-12	7.3165	7.466	7.4043	7.2269	7.6991	0	0	0	0	0		7.42256
Ddx3x	5.234e-11	1.156e-10	11.032	10.82	10.715	10.77	10.644	3.511	3.4463	3.8176	3.0531	3.0531		7.41998
Hdgfl3	1.529e-09	2.284e-09	11.701	11.49	11.544	11.523	11.253	3.511	4.1859	3.991	3.8176	4.9069		7.41972
Cbr4	1.992e-15	3.331e-14	7.4085	7.5133	7.2649	7.5038	7.4026	0	0	0	0	0		7.41862
Mbp	1.323e-10	2.596e-10	14.732	15.013	14.7	14.78	14.041	7.4051	7.4396	7.1117	7.1375	7.0811		7.4182
Fxr2	1.463e-08	1.854e-08	7.3246	8.2882	7.3794	7.7814	6.3129	0	0	0	0	0		7.4173
Ctnnbl1	2.396e-10	4.348e-10	7.6286	7.0639	7.3038	7.019	8.058	0	0	0	0	0		7.41466
Tmsb15b1	8.474e-12	2.517e-11	7.3092	7.7728	7.3619	7.5917	7.0257	0	0	0	0	0		7.41226
Dtx3	4.802e-07	5.437e-07	7.9519	8.1859	8.0832	8.0301	7.1869	0	0	2.3785	0	0		7.4119
Bag3	3.033e-13	1.637e-12	7.5322	7.5022	7.3372	7.5645	7.1127	0	0	0	0	0		7.40976
Uck1	6.917e-13	3.14e-12	7.5259	7.5744	7.4153	7.4717	7.0509	0	0	0	0	0		7.40764
Emc7	1.523e-09	2.276e-09	7.4619	8.0168	7.2085	7.7515	6.594	0	0	0	0	0		7.40654
Ythdc2	7.763e-11	1.62e-10	8.0639	7.2761	7.3452	7.1579	7.1829	0	0	0	0	0		7.4052
Uba5	2.583e-08	3.2e-08	7.6632	6.9646	6.8202	6.9021	8.6639	0	0	0	0	0		7.4028
Slc25a46	1.048e-11	3.024e-11	7.3461	7.3897	7.0157	7.3872	7.8361	0	0	0	0	0		7.39496
Eps8l2	1.366e-08	1.739e-08	7.1477	8.2374	7.5789	7.6984	6.3111	0	0	0	0	0		7.3947
Grsf1	1.609e-11	4.342e-11	7.5992	7.5857	7.3549	7.56	6.8728	0	0	0	0	0		7.39452
Eef1akmt2	7.463e-15	8.631e-14	7.1878	7.4296	7.4221	7.487	7.4429	0	0	0	0	0		7.39388
Kcnj3	8.972e-10	1.412e-09	7.2036	7.9864	7.4586	7.6781	6.6395	0	0	0	0	0		7.39324
Ephb2	3.796e-12	1.271e-11	7.7136	7.264	7.1457	7.2104	7.6169	0	0	0	0	0		7.39012
Mindy1	7.092e-15	8.311e-14	7.3246	7.5102	7.417	7.4684	7.2192	0	0	0	0	0		7.38788
NOGENE	4.202e-14	3.362e-13	7.4553	7.5947	7.2046	7.3461	7.3354	0	0	0	0	0		7.38722
Hdlbp	1.438e-10	2.792e-10	12.441	12.253	12.051	12.176	11.578	4.6668	4.7279	4.5484	5.1169	4.5046		7.38688
Tex264	8.883e-14	6.121e-13	7.2346	7.5782	7.3407	7.5337	7.247	0	0	0	0	0		7.38684
Nhp2	3.07e-11	7.428e-11	7.7781	7.4806	7.2489	7.5322	6.8936	0	0	0	0	0		7.38668
Hdgfl3	1.579e-09	2.353e-09	11.677	11.432	11.509	11.48	11.233	3.511	4.1859	3.991	3.8176	4.9069		7.38372
Ostf1	1.463e-13	8.929e-13	7.1799	7.3074	7.5236	7.5932	7.3074	0	0	0	0	0		7.3823
Grn	9.025e-13	3.838e-12	7.73	7.4237	7.2422	7.1957	7.3001	0	0	0	0	0		7.37834
Eef1akmt1	5.143e-11	1.139e-10	7.2269	7.5744	7.6036	7.6646	6.8202	0	0	0	0	0		7.37794
Qtrt1	2.75e-10	4.902e-10	7.6914	7.6977	7.3872	7.4717	6.6294	0	0	0	0	0		7.37548
Fabp3	3.105e-11	7.496e-11	14.174	13.595	13.653	13.686	14.1	6.438	6.2384	6.3992	6.7629	6.5078		7.37234
Rab3c	3.337e-10	5.819e-10	11.832	11.841	12.022	12.006	12.653	4.3785	4.5969	4.6837	4.706	5.1859		7.3606
Arid1a	4.697e-12	1.526e-11	7.3602	7.6453	7.3407	7.5086	6.9449	0	0	0	0	0		7.35994
Cnnm1	4.327e-11	9.841e-11	7.799	7.47	6.8642	7.2065	7.4454	0	0	0	0	0		7.35702
Dock7	1.948e-12	7.343e-12	7.5691	7.5484	7.2677	7.3872	6.9955	0	0	0	0	0		7.35358
Osbpl9	1.341e-13	8.386e-13	7.1064	7.4254	7.5554	7.2808	7.3837	0	0	0	0	0		7.35034
Ubqln4	5.109e-13	2.473e-12	7.5507	7.1839	7.3156	7.5615	7.1396	0	0	0	0	0		7.35026
Tmem9b	4.485e-11	1.013e-10	7.2873	7.2336	7.1457	7.1189	7.96	0	0	0	0	0		7.3491
Sv2a	1.653e-11	4.43e-11	12.882	12.632	12.608	12.539	13.209	5.6496	5.278	5.4094	5.3923	5.4026		7.34762
Asic1	8.751e-15	9.656e-14	7.1639	7.3514	7.457	7.3138	7.4487	0	0	0	0	0		7.34696
Lsm14a	1.701e-10	3.239e-10	8.0509	7.2104	7.2346	7.2668	6.9681	0	0	0	0	0		7.34616
Pip5k1c	4.957e-14	3.813e-13	12.023	12.217	12.32	12.159	12.325	4.9588	4.9069	4.8875	4.7708	4.7918		7.34564
Tubgcp2	3.406e-11	8.095e-11	6.9189	7.6206	7.5984	7.5392	7.0411	0	0	0	0	0		7.34364
Akap9	5.355e-13	2.563e-12	7.2269	7.3837	7.3487	7.6446	7.1117	0	0	0	0	0		7.34312
Akap9	5.355e-13	2.563e-12	7.2269	7.3837	7.3487	7.6446	7.1117	0	0	0	0	0		7.34312
Pcm1	2.348e-13	1.32e-12	7.1639	7.4886	7.3872	7.5275	7.1416	0	0	0	0	0		7.34176
Mrpl17	1.802e-11	4.762e-11	7.5006	7.6439	7.2798	7.4454	6.8379	0	0	0	0	0		7.34152
Pianp	8.274e-10	1.313e-09	6.7361	7.7609	7.4512	7.853	6.9057	0	0	0	0	0		7.34138
Mcu	5.928e-11	1.286e-10	11.014	11.016	11.185	11.115	11.573	3.6206	3.5969	3.797	3.9069	4.278		7.34072
Sh3rf1	1.016e-10	2.058e-10	7.3742	7.7415	7.3983	7.4838	6.7018	0	0	0	0	0		7.33992
Usp8	3.024e-11	7.337e-11	7.4153	7.6575	7.3716	7.47	6.78	0	0	0	0	0		7.33888
Cc2d1b	1.309e-11	3.634e-11	7.5932	7.3381	7.3273	7.5683	6.8517	0	0	0	0	0		7.33572
Rdh13	1.112e-13	7.236e-13	7.1313	7.4561	7.4619	7.4438	7.1819	0	0	0	0	0		7.335
Srp54c	4.742e-12	1.536e-11	7.3672	7.6257	7.2854	7.4717	6.9248	0	0	0	0	0		7.33496
Gtf2e2	1.817e-09	2.666e-09	7.73	7.7872	7.2752	7.4594	6.4162	0	0	0	0	0		7.3336
Slitrk1	6.498e-15	7.787e-14	7.1396	7.4212	7.312	7.3724	7.4077	0	0	0	0	0		7.33058
Tpm1	9.247e-10	1.452e-09	10.647	10.457	10.332	10.353	10.241	2.3219	3.0531	3.1043	3.6554	3.2479		7.32948
Tecpr2	7.56e-12	2.294e-11	7.4553	7.5314	7.3192	7.487	6.853	0	0	0	0	0		7.32918
Naxd	1.438e-10	2.792e-10	10.665	10.75	10.623	10.729	10.207	2.7655	3.1375	3.3923	3.6554	3.3785		7.32896
Srsf10	4.277e-10	7.258e-10	7.9331	7.5329	7.2451	7.2612	6.6724	0	0	0	0	0		7.32894
Ethe1	1.246e-10	2.463e-10	7.4487	7.5668	7.4603	7.5368	6.6279	0	0	0	0	0		7.3281
Tbcd	2.101e-11	5.385e-11	7.1957	7.1859	7.2026	7.1629	7.8918	0	0	0	0	0		7.32778
Phkb	2.31e-13	1.304e-12	7.5872	7.3837	7.2752	7.0949	7.2909	0	0	0	0	0		7.32638
Abcd3	5.195e-13	2.505e-12	7.4814	7.2826	7.0704	7.2269	7.5638	0	0	0	0	0		7.32502
Zfp142	5.755e-09	7.726e-09	7.4619	6.8316	6.9704	6.9519	8.3755	0	0	0	0	0		7.31826
Abi3	3.968e-12	1.32e-11	7.388	7.4806	7.3619	7.4854	6.8704	0	0	0	0	0		7.31726
K16	9.708e-07	1.084e-06	8.5721	6.3558	6.4676	6.433	8.7452	0	0	0	0	0		7.31474
Usp4	3.768e-15	5.353e-14	7.2946	7.3733	7.1385	7.4119	7.3531	0	0	0	0	0		7.31428
Snx14	8.165e-11	1.693e-10	7.0466	7.7482	7.4111	7.5368	6.8253	0	0	0	0	0		7.3136
Egln1	4.934e-10	8.25e-10	7.3246	7.7415	7.2873	7.6511	6.5531	0	0	0	0	0		7.31152
Bloc1s1	2.858e-11	6.992e-11	7.4619	7.708	7.224	7.3407	6.8215	0	0	0	0	0		7.31122
Nup155	2.181e-12	8.038e-12	7.5507	7.3602	6.9738	7.1669	7.4854	0	0	0	0	0		7.3074
Zfp326	8.006e-12	2.401e-11	7.4814	7.5835	7.1849	7.3975	6.8814	0	0	0	0	0		7.30574
Stk24	1.58e-10	3.03e-10	10.808	10.736	10.723	10.685	10.869	2.7655	3.5729	3.511	3.7225	3.7225		7.30532
Acan	1.173e-10	2.341e-10	7.4017	7.6823	7.1436	7.5842	6.7101	0	0	0	0	0		7.30438
Clic4	1.557e-12	6.126e-12	7.4619	7.4725	6.9425	7.2172	7.4254	0	0	0	0	0		7.3039
Prrt3	2.358e-10	4.294e-10	7.4943	7.6539	7.1699	7.5804	6.6162	0	0	0	0	0		7.30294
Pdxdc1	1.196e-11	3.371e-11	7.1396	7.5275	7.3056	7.6154	6.8924	0	0	0	0	0		7.2961
Zc3h18	1.875e-11	4.921e-11	7.7245	7.3897	7.2489	7.2536	6.8629	0	0	0	0	0		7.29592
Nr3c1	1.265e-13	8.037e-13	7.2649	7.452	7.2798	7.4388	7.0433	0	0	0	0	0		7.29576
Rnf20	2.143e-10	3.97e-10	7.9612	7.1928	7.2696	7.2536	6.7944	0	0	0	0	0		7.29432
Ubap1	8.923e-09	1.163e-08	7.0201	7.8499	7.4077	7.9069	6.2761	0	0	0	0	0		7.29214
Stn1	3.048e-09	4.287e-09	6.9378	7.8936	7.6036	7.5661	6.4446	0	0	0	0	0		7.28914
Cacng3	2.466e-07	2.836e-07	9.0224	7.2845	7.0629	6.6467	6.4279	0	0	0	0	0		7.28888
Plxnc1	8.943e-16	1.891e-14	7.3461	7.3165	7.3716	7.263	7.1467	0	0	0	0	0		7.28878
Slc25a10	1.124e-13	7.297e-13	7.507	7.3273	7.3354	7.2026	7.0704	0	0	0	0	0		7.28854
Plin4	1.367e-10	2.668e-10	7.2269	7.6893	7.3742	7.5054	6.6467	0	0	0	0	0		7.2885
Dhx29	1.684e-14	1.592e-13	7.4288	7.3228	7.224	7.0991	7.3611	0	0	0	0	0		7.28716
Trmt11	1.073e-11	3.086e-11	7.1799	7.6184	7.3407	7.4371	6.8555	0	0	0	0	0		7.28632
Psmb7	4.908e-12	1.582e-11	11.687	11.715	11.832	11.779	11.71	4.0618	4.3716	4.5607	4.7225	4.5789		7.2855
Gss	4.021e-09	5.551e-09	10.673	10.853	10.713	10.781	10.066	2.9069	2.7004	3.6668	3.9355	3.4725		7.28078
Lyrm2	2.073e-10	3.856e-10	7.0466	7.5804	7.5454	7.5661	6.6467	0	0	0	0	0		7.27704
Stam	8.297e-12	2.472e-11	11.352	11.203	11.147	11.214	11.294	4.2327	4.0618	4.1293	3.848	3.5607		7.2755
Agpat4	9.411e-10	1.475e-09	7.2946	6.96	7.4043	6.6907	8.0251	0	0	0	0	0		7.27494
Ccdc50	2.397e-09	3.45e-09	8.0596	7.47	7.1344	7.2104	6.4919	0	0	0	0	0		7.27326
Krt14	1.457e-06	1.62e-06	9.113	6.4838	6.4951	6.1375	8.1303	0	0	0	0	0		7.27194
Htatip2	7.408e-09	9.743e-09	6.9472	7.8125	7.4927	7.8157	6.2854	0	0	0	0	0		7.2707
Yme1l1	2.314e-12	8.427e-12	7.4017	7.4959	7.1957	7.3611	6.8912	0	0	0	0	0		7.26912
Lamb1	4.602e-12	1.5e-11	7.1477	7.4438	7.4463	7.4313	6.8629	0	0	0	0	0		7.2664
Fasn	6.481e-11	1.386e-10	12.899	12.863	12.937	12.871	13.239	5.9069	5.89	5.6381	5.1538	5.8972		7.2646
Chtf8	1.696e-09	2.506e-09	7.4288	7.6539	7.2649	7.6337	6.3345	0	0	0	0	0		7.26316
Ttbk1	4.434e-09	6.067e-09	7.9093	7.6802	7.1528	7.2555	6.3147	0	0	0	0	0		7.2625
Lpp	1.116e-11	3.191e-11	7.6745	6.9224	7.4111	7.1819	7.121	0	0	0	0	0		7.26218
Eml2	3.357e-14	2.768e-13	7.339	7.0747	7.2384	7.2085	7.4454	0	0	0	0	0		7.2612
Akap10	1.646e-11	4.415e-11	7.1957	7.5484	7.4077	7.3794	6.7655	0	0	0	0	0		7.25934
Zadh2	4.499e-11	1.015e-10	7.1878	7.5615	7.3966	7.4496	6.6921	0	0	0	0	0		7.25752
Slc1a1	1.145e-10	2.293e-10	7.0023	7.2919	6.9784	7.0843	7.9081	0	0	0	0	0		7.253
Cntn3	2.649e-12	9.408e-12	7.3602	7.4806	7.1477	7.3872	6.879	0	0	0	0	0		7.25094
Ndufs2	7.307e-09	9.621e-09	11.48	11.523	11.504	11.515	11.815	4.717	4.3854	4.591	3.2016	4.6893		7.25054
Smarca2	5.272e-15	6.75e-14	7.1064	7.3452	7.1548	7.3237	7.3192	0	0	0	0	0		7.24986
Chd5	1.942e-12	7.329e-12	7.2873	7.5196	7.1365	7.3846	6.9189	0	0	0	0	0		7.24938
Cldn10	8.501e-12	2.524e-11	6.9565	7.5022	6.9977	7.5615	7.2288	0	0	0	0	0		7.24934
Stx17	3.426e-11	8.131e-11	7.2649	7.563	7.3001	7.4246	6.6935	0	0	0	0	0		7.24922
Herc4	5.971e-11	1.294e-10	7.8405	7.2965	7.08	7.0991	6.9272	0	0	0	0	0		7.24866
Eif4enif1	6.822e-10	1.101e-09	7.4749	7.5461	7.3584	7.4627	6.3906	0	0	0	0	0		7.24654
Ncam2	1.384e-12	5.54e-12	13.207	13.131	13.348	13.212	13.553	5.8202	6.1977	6.04	6.0157	6.1518		7.24512
Mboat7	7.66e-10	1.223e-09	7.5384	7.1106	6.9449	6.7004	7.9307	0	0	0	0	0		7.245
Rasgrp1	8.049e-13	3.534e-12	6.9841	7.4504	7.417	7.2909	7.0715	0	0	0	0	0		7.24278
Cox14	4.852e-14	3.764e-13	7.0725	7.4586	7.2873	7.1558	7.2346	0	0	0	0	0		7.24176
Sh3bp1	5.556e-13	2.643e-12	7.0896	7.3425	7.4838	7.2909	6.9921	0	0	0	0	0		7.23978
Mocs2	4.977e-11	1.105e-10	7.0201	7.4998	7.3434	7.5759	6.7469	0	0	0	0	0		7.23722
mKIAA0684	1.982e-12	7.45e-12	7.1148	7.3733	7.4094	7.3992	6.8826	0	0	0	0	0		7.23586
Iglon5	5.12e-10	8.52e-10	7.4288	6.8379	6.9932	6.9378	7.9583	0	0	0	0	0		7.2312
Smarcd2	2.264e-10	4.148e-10	6.7361	7.633	7.5353	7.4279	6.8227	0	0	0	0	0		7.231
Susd5	1.001e-10	2.032e-10	7.3092	7.029	6.8741	7.0906	7.8474	0	0	0	0	0		7.23006
Fuom	3.473e-11	8.232e-11	7.1313	7.5668	7.3923	7.3496	6.7046	0	0	0	0	0		7.22892
Borcs8	8.411e-10	1.331e-09	7.5196	7.4545	7.3452	7.4561	6.347	0	0	0	0	0		7.22448
Igsf8	5.583e-12	1.765e-11	12.367	12.179	12	12.108	11.941	4.5789	4.8278	4.9635	5.1169	4.9864		7.2243
Tex2	8.403e-14	5.875e-13	7.2036	7.4782	7.1699	7.2046	7.0542	0	0	0	0	0		7.2221
Tmed10	5.668e-11	1.239e-10	11.004	10.769	10.964	10.813	11.21	3.2016	3.7655	3.9069	3.8176	3.9635		7.22098
Rb1cc1	1.411e-13	8.686e-13	7.098	7.417	7.1918	7.3628	7.0312	0	0	0	0	0		7.22016
Hectd3	9.86e-15	1.053e-13	7.2798	7.3381	7.0224	7.225	7.2336	0	0	0	0	0		7.21978
Il1rap	3.893e-13	1.997e-12	7.4619	7.2574	6.9425	7.1609	7.2649	0	0	0	0	0		7.21752
Mff	1.364e-09	2.062e-09	8.0553	7.0906	6.7455	6.8392	7.3549	0	0	0	0	0		7.2171
Rpl18	8.627e-09	1.127e-08	10.411	10.257	10.521	10.372	11.244	2.511	3.2327	3.4195	3.6554	3.9165		7.21398
Hacl1	1.264e-11	3.526e-11	7.3602	7.466	7.2836	7.2355	6.7142	0	0	0	0	0		7.2119
Sdk1	1.048e-14	1.103e-13	7.0466	7.382	7.1829	7.2104	7.2327	0	0	0	0	0		7.21092
D3Ertd751e	1.228e-11	3.447e-11	6.8605	7.246	7.5236	7.4471	6.9669	0	0	0	0	0		7.20882
Phox2b	2.04e-10	3.804e-10	7.563	7.4026	7.1639	7.394	6.5141	0	0	0	0	0		7.20752
Aftph	1.44e-13	8.82e-13	7.4619	7.2172	7.0279	7.2336	7.0938	0	0	0	0	0		7.20688
Akap8	7.616e-12	2.305e-11	7.3246	7.3558	7.1436	7.4454	6.7576	0	0	0	0	0		7.2054
Vamp4	5.231e-13	2.516e-12	7.2724	7.4195	7.2649	7.1649	6.8936	0	0	0	0	0		7.20306
Gcat	1.825e-09	2.677e-09	7.4355	7.6242	7.0725	7.5645	6.3074	0	0	0	0	0		7.20082
Rps5	1.219e-05	1.322e-05	8.6169	8.7122	8.9369	8.7928	9.6242	2.9449	0	2.263	0	3.4725		7.20052
Hsdl1	3.836e-11	8.924e-11	6.7142	7.3966	7.0279	7.2649	7.5721	0	0	0	0	0		7.19514
Slc35a4	6.672e-09	8.849e-09	6.9932	7.9087	7.278	7.5661	6.225	0	0	0	0	0		7.1942
Adcy5	4.496e-18	4.989e-16	7.2114	7.1859	7.1189	7.2288	7.2259	0	0	0	0	0		7.19418
Amot	1.148e-11	3.259e-11	7.0466	7.4212	7.4782	7.2432	6.7774	0	0	0	0	0		7.19332
Gpm6b	4.632e-09	6.321e-09	12.731	12.35	12.663	12.441	13.763	5.4026	5.4822	5.4919	5.6264	5.9796		7.19306
Irs2	6.054e-09	8.094e-09	7.2269	7.7807	7.3273	7.5006	6.1272	0	0	0	0	0		7.19254
U2surp	1.618e-11	4.357e-11	7.3602	7.2873	6.7918	6.9715	7.5283	0	0	0	0	0		7.18782
Stxbp3	6.796e-14	4.949e-13	7.388	7.1293	6.9761	7.2007	7.2403	0	0	0	0	0		7.18688
Gpatch8	4.597e-11	1.034e-10	7.2114	7.4886	7.3318	7.2808	6.5999	0	0	0	0	0		7.1825
Syt12	4.362e-10	7.395e-10	10.496	10.944	10.939	10.817	10.752	3.1043	3.7115	3.2928	3.7866	4.1457		7.18142
Ubac1	4.877e-13	2.387e-12	7.029	7.2965	7.1977	7.4279	6.9542	0	0	0	0	0		7.18106
Eloc	1.294e-11	3.604e-11	10.643	10.974	10.758	10.843	10.337	3.6206	3.5969	3.4463	3.2928	3.7004		7.1796
Cntnap4	2.264e-09	3.271e-09	7.9977	7.2687	7.1938	6.9715	6.4594	0	0	0	0	0		7.17822
Ubxn7	5.093e-10	8.48e-10	7.0725	7.6872	7.2677	7.3992	6.4545	0	0	0	0	0		7.17622
Tmod3	6.425e-09	8.559e-09	7.1313	7.7515	7.3291	7.5469	6.1189	0	0	0	0	0		7.17554
Mocs1	4.953e-14	3.813e-13	7.098	7.3496	7.2836	7.1221	6.9932	0	0	0	0	0		7.1693
Wwp1	3.498e-12	1.19e-11	7.4553	7.321	7.0564	7.1819	6.8151	0	0	0	0	0		7.16594
Gm2a	1.324e-10	2.597e-10	6.8997	7.3584	6.9784	7.7589	6.8342	0	0	0	0	0		7.16592
Chrm4	3.91e-12	1.304e-11	6.9841	7.5461	6.9658	7.2873	7.0334	0	0	0	0	0		7.16334
Akt1s1	2.725e-09	3.879e-09	7.1064	7.7774	7.2403	7.4313	6.2498	0	0	0	0	0		7.16104
Insrr	1.533e-09	2.288e-09	8.0596	6.9989	6.7401	6.8342	7.1679	0	0	0	0	0		7.16014
Prpf4b	2.351e-13	1.32e-12	6.9093	7.301	7.2221	7.3174	7.0498	0	0	0	0	0		7.15992
ND2	1.04e-10	2.098e-10	7.6632	6.7184	6.8875	7.1436	7.3724	0	0	0	0	0		7.15702
Hddc3	1.705e-10	3.247e-10	6.8304	7.5157	7.2854	7.5006	6.6352	0	0	0	0	0		7.15346
Cyb5r1	3.244e-10	5.685e-10	7.0553	6.6696	7.1548	7.029	7.8574	0	0	0	0	0		7.15322
Adcy2	1.991e-12	7.468e-12	7.0378	7.246	6.853	7.1609	7.4668	0	0	0	0	0		7.1529
Cmtm5	4.642e-10	7.82e-10	7.4421	6.9761	6.7482	6.7931	7.799	0	0	0	0	0		7.1517
Mrpl44	8.085e-13	3.541e-12	7.339	6.9331	7.08	7.0079	7.3949	0	0	0	0	0		7.15098
Txlna	4.734e-12	1.535e-11	7.4749	7.2546	7.0279	7.1987	6.7931	0	0	0	0	0		7.14984
Dusp28	1.588e-12	6.208e-12	6.9658	7.4094	6.9853	7.3759	7.0112	0	0	0	0	0		7.14952
Parp3	1.804e-10	3.411e-10	7.1064	7.4338	7.2649	7.4668	6.4757	0	0	0	0	0		7.14952
Kcna4	7.587e-11	1.588e-10	6.7469	7.6073	6.9807	7.4405	6.9542	0	0	0	0	0		7.14592
Ldhd	3.152e-10	5.537e-10	7.7462	7.3663	7.0101	6.9977	6.5999	0	0	0	0	0		7.14404
Nup93	5.11e-13	2.473e-12	7.3742	7.312	6.953	7.1106	6.9692	0	0	0	0	0		7.1438
Tbc1d23	7.341e-14	5.272e-13	6.9284	7.2965	7.2422	7.2026	7.0488	0	0	0	0	0		7.1437
Pxn	4.835e-11	1.077e-10	7.1396	7.417	7.1497	7.4229	6.5835	0	0	0	0	0		7.14254
Nup37	5.64e-13	2.673e-12	6.89	7.2873	7.1252	7.3776	7.0301	0	0	0	0	0		7.14204
Fam172a	2.935e-11	7.152e-11	7.388	7.4943	7.0466	7.1043	6.6767	0	0	0	0	0		7.14198
Hgs	1.69e-12	6.576e-12	11.392	11.205	11.211	11.162	11.452	4.2172	3.8278	4.3074	4.1779	4.1859		7.14116
Clec2l	1.784e-12	6.87e-12	6.9284	6.9738	7.1231	7.1749	7.5006	0	0	0	0	0		7.14016
Gys1	2.606e-13	1.445e-12	7.098	7.04	7.1957	7.4102	6.9449	0	0	0	0	0		7.13776
Cabp1	4.351e-07	4.94e-07	8.8019	7.3966	6.6795	6.9272	5.8802	0	0	0	0	0		7.13708
Maoa	1.307e-10	2.569e-10	11.032	10.896	11.105	11.005	11.689	3.858	3.7442	4.3219	3.991	4.1293		7.13652
Dock3	1.443e-13	8.829e-13	7.1064	7.2715	6.9577	7.0079	7.339	0	0	0	0	0		7.1365
Ift74	2.101e-09	3.05e-09	7.0639	7.7662	7.1898	7.3742	6.2761	0	0	0	0	0		7.13404
1700037H04Rik	4.384e-13	2.188e-12	7.1148	7.3983	6.8642	7.1457	7.1457	0	0	0	0	0		7.13374
Rpl35a	7.859e-12	2.364e-11	12.256	12.349	12.345	12.298	12.219	5.0661	5.5515	5.1699	4.8176	5.2133		7.12972
Sssca1	1.672e-11	4.467e-11	6.7682	7.4153	7.3056	7.3047	6.843	0	0	0	0	0		7.12736
Tsc22d2	2.567e-10	4.622e-10	7.1064	7.5353	7.1769	7.3707	6.4363	0	0	0	0	0		7.12512
Sbf1	5.321e-05	5.72e-05	10.734	10.862	10.785	10.857	10.62	4.466	4.3576	4.6611	0	4.7495		7.12476
Rabgef1	2.747e-11	6.763e-11	7.4017	7.2798	7.1169	7.2355	6.5865	0	0	0	0	0		7.12408
Mia3	5.963e-12	1.865e-11	6.6582	7.2845	7.2346	7.1878	7.2489	0	0	0	0	0		7.1228
Magohb	1.648e-13	9.873e-13	7.0896	7.2891	7.0564	7.2845	6.8936	0	0	0	0	0		7.12264
Sh3pxd2a	2.688e-10	4.808e-10	7.2422	7.4094	7.3174	7.2649	6.375	0	0	0	0	0		7.12178
Ncbp2	2.84e-12	9.954e-12	7.0378	7.4212	7.1639	7.2124	6.7735	0	0	0	0	0		7.12176
Gucy1b1	3.899e-13	1.998e-12	7.0811	7.1957	6.8851	7.0477	7.3863	0	0	0	0	0		7.11918
Cav1	9.162e-12	2.696e-11	6.9093	6.9009	7.1609	6.9864	7.56	0	0	0	0	0		7.1035
Rsf1	1.228e-10	2.432e-10	7.2946	7.394	7.1809	7.2085	6.4363	0	0	0	0	0		7.10286
Plcb3	3.678e-14	3.013e-13	6.9841	6.9623	7.1977	7.079	7.2845	0	0	0	0	0		7.10152
Kyat3	8.685e-11	1.791e-10	7.2114	7.4643	7.0034	7.3047	6.5188	0	0	0	0	0		7.10052
Gabra5	1.361e-09	2.058e-09	7.098	7.6893	6.9681	7.4195	6.3255	0	0	0	0	0		7.10008
Sike1	2.949e-11	7.181e-11	7.0639	7.2621	7.1609	7.4229	6.5789	0	0	0	0	0		7.09774
Apba2	5.317e-10	8.8e-10	7.6518	7.3584	6.9224	7.1169	6.438	0	0	0	0	0		7.0975
Hmgb3	2.819e-10	5.016e-10	6.9284	7.5538	7.2696	7.2789	6.4512	0	0	0	0	0		7.09638
Pla2g7	1.687e-16	5.905e-15	7.1313	7.1957	7.0488	7.04	7.0378	0	0	0	0	0		7.09072
Sorl1	1.913e-15	3.25e-14	6.9378	7.0585	7.1739	7.1324	7.1477	0	0	0	0	0		7.09006
1810009N02Rik	9.796e-12	2.852e-11	7.0378	7.3514	7.2873	7.0991	6.6453	0	0	0	0	0		7.08418
Znf704	3.871e-11	8.994e-11	7.4153	6.78	6.7629	7.0246	7.438	0	0	0	0	0		7.08416
Dpp3	3.964e-11	9.172e-11	10.552	10.714	10.856	10.681	10.75	3.3363	3.5484	3.6439	3.4594	4.1457		7.08386
Nell2	5.906e-11	1.283e-10	6.9472	6.7004	7.0179	7.1022	7.6424	0	0	0	0	0		7.08202
Tsfm	1.242e-11	3.478e-11	11.42	11.314	11.282	11.277	11.043	4.2479	4.3363	4.433	3.7866	4.1293		7.08058
Pars2	1.188e-12	4.858e-12	7.339	7.029	6.7629	7.1839	7.0736	0	0	0	0	0		7.07768
Rilpl1	2.824e-12	9.916e-12	7.1799	7.312	6.7655	7.2307	6.8814	0	0	0	0	0		7.0739
Rps9	3.728e-09	5.174e-09	11.417	11.426	11.522	11.365	11.793	4.1457	4.9212	4.3576	3.6893	5.04		7.07384
Hook1	1.576e-08	1.99e-08	7.0639	7.56	7.4943	7.3759	5.8654	0	0	0	0	0		7.0719
Rps6ka2	7.616e-12	2.305e-11	6.7032	6.9819	7.3192	6.9955	7.3487	0	0	0	0	0		7.0697
Tom1l1	1.764e-14	1.646e-13	7.2649	7.0875	6.9887	7.0661	6.9355	0	0	0	0	0		7.06854
Ctsz	9.836e-14	6.597e-13	7.0639	7.2527	6.8505	7.1649	6.991	0	0	0	0	0		7.0646
Trappc6b	7.273e-10	1.165e-09	7.2724	6.6088	6.7996	6.8048	7.7794	0	0	0	0	0		7.053
Ube2f	4.106e-06	4.504e-06	9.4219	6.9966	6.6851	6.6029	5.5546	0	0	0	0	0		7.05222
Dennd4b	2.121e-13	1.213e-12	6.7996	7.0564	7.0367	7.0885	7.2789	0	0	0	0	0		7.05202
Snrpf	1.481e-08	1.877e-08	6.8202	7.7149	7.1365	7.5917	5.9887	0	0	0	0	0		7.0504
Pof1b	2.447e-10	4.426e-10	6.7142	6.7374	7.2085	6.8839	7.6977	0	0	0	0	0		7.04834
Vti1b	7.535e-16	1.68e-14	7.1231	7.0268	7.0444	6.9201	7.1252	0	0	0	0	0		7.04792
Plin3	9.619e-12	2.812e-11	7.0811	7.2055	7.1849	7.2026	6.5638	0	0	0	0	0		7.04758
Kcmf1	1.828e-09	2.681e-09	7.0553	7.5133	7.1809	7.3291	6.1436	0	0	0	0	0		7.04444
Lrrtm2	9.334e-13	3.956e-12	7.0896	6.9932	6.9355	6.8316	7.3716	0	0	0	0	0		7.0443
Cnot4	1.378e-09	2.079e-09	7.3602	7.375	7.2221	7.1127	6.1457	0	0	0	0	0		7.04314
Soga3	6.416e-11	1.373e-10	11.855	11.491	11.601	11.52	11.99	4.4263	5.0045	4.706	4.3363	4.7761		7.04156
NOGENE	3.145e-11	7.583e-11	7.1064	7.388	7.0444	7.1385	6.5188	0	0	0	0	0		7.03922
Coq7	2.33e-10	4.251e-10	7.0023	7.4463	7.1075	7.263	6.3681	0	0	0	0	0		7.03744
Dyx1c1	3.493e-15	5.044e-14	7.1799	7.0585	6.9681	6.9117	7.0542	0	0	0	0	0		7.03448
Rnf113a2	4.793e-09	6.527e-09	6.8505	7.5368	7.3092	7.4068	6.0661	0	0	0	0	0		7.03388
Ccdc22	1.984e-10	3.712e-10	6.8099	7.4504	7.1739	7.2789	6.4496	0	0	0	0	0		7.03254
Necap2	4.607e-10	7.764e-10	6.9932	7.4479	7.1679	7.2593	6.2891	0	0	0	0	0		7.03148
Ss18l1	4.112e-08	5e-08	7.73	6.4757	6.2983	6.6221	8.0185	0	0	0	0	0		7.02892
Gpt	2.005e-14	1.796e-13	6.8405	7.0928	7.1033	7.1416	6.9484	0	0	0	0	0		7.02532
Znf706	2.345e-09	3.378e-09	7.7569	7.2527	6.9761	6.879	6.2593	0	0	0	0	0		7.0248
Babam2	3.203e-11	7.703e-11	6.5744	7.3707	6.8875	7.2808	7.0101	0	0	0	0	0		7.0247
Dcc	2.389e-10	4.338e-10	7.0378	7.3733	7.0279	7.3291	6.347	0	0	0	0	0		7.02302
Elfn1	7.482e-14	5.343e-13	6.9472	6.8405	7.0157	7.0682	7.2422	0	0	0	0	0		7.02276
NOGENE	1.56e-11	4.237e-11	6.9932	6.7549	7.04	6.8215	7.4983	0	0	0	0	0		7.02158
Capn5	4.23e-12	1.391e-11	6.8997	7.098	6.7129	7.0101	7.3802	0	0	0	0	0		7.02018
Wdr81	8.955e-13	3.829e-12	6.8704	7.2668	6.9932	7.1819	6.784	0	0	0	0	0		7.01926
Naa30	1.028e-15	2.066e-14	6.89	7.0693	6.9658	7.1085	7.0422	0	0	0	0	0		7.01516
Dnal4	2.847e-11	6.968e-11	6.5251	6.8741	7.1416	7.1898	7.3102	0	0	0	0	0		7.00816
Arhgap11a	3.999e-10	6.827e-10	6.7682	7.394	7.2574	7.2517	6.3487	0	0	0	0	0		7.004
Sec11c	3.606e-12	1.219e-11	7.0811	6.8555	6.9248	6.7629	7.3802	0	0	0	0	0		7.0009
Egfr	5.447e-15	6.904e-14	6.89	7.121	6.8985	7.0949	6.9977	0	0	0	0	0		7.00042
Adam22	3.189e-12	1.097e-11	11.896	12.091	11.986	11.92	12.17	5.1334	4.9681	5.2555	5.009	4.7004		6.99932
Chkb	2.34e-12	8.511e-12	7.3165	7.0821	6.78	6.7708	7.0444	0	0	0	0	0		6.99876
Anapc1	8.99e-12	2.654e-11	6.6696	7.2317	7.2133	7.1365	6.7415	0	0	0	0	0		6.99852
Myt1l	5.671e-12	1.784e-11	6.8304	7.2621	7.1075	7.1436	6.6366	0	0	0	0	0		6.99604
Ccdc85a	6.395e-11	1.37e-10	7.0466	7.3228	7.0201	7.1749	6.4145	0	0	0	0	0		6.99578
Rcbtb2	4.845e-10	8.116e-10	7.1064	7.3689	7.0885	7.1819	6.2192	0	0	0	0	0		6.99298
Lamp3	1.447e-11	3.968e-11	7.0112	6.6352	7.4221	7.0312	6.8642	0	0	0	0	0		6.99278
Trmt10c	2.466e-12	8.854e-12	7.2422	7.1809	6.8138	7.0056	6.706	0	0	0	0	0		6.9897
Fam133b	2.01e-14	1.797e-13	6.8605	7.1085	6.9681	6.8765	7.1293	0	0	0	0	0		6.98858
Pnpla6	2.169e-10	4.012e-10	7.1639	7.2365	7.0821	7.1729	6.2705	0	0	0	0	0		6.98518
Ssr3	8.838e-11	1.819e-10	6.8802	6.6935	6.8392	6.8997	7.6132	0	0	0	0	0		6.98516
Entpd1	1.378e-11	3.801e-11	7.0023	7.3345	6.953	7.079	6.5454	0	0	0	0	0		6.98284
Enpp6	1.135e-13	7.348e-13	6.7252	7.1365	7.0466	6.9623	7.0411	0	0	0	0	0		6.98234
Sh3rf3	1.428e-08	1.814e-08	7.0466	7.6221	7.0509	7.3478	5.8354	0	0	0	0	0		6.98056
Thoc2	1.437e-12	5.719e-12	7.0466	6.991	6.9704	7.225	6.6337	0	0	0	0	0		6.97334
Mtmr2	1.389e-12	5.557e-12	6.6352	6.9565	7.1252	6.9577	7.1849	0	0	0	0	0		6.9719
Lpgat1	1.306e-11	3.631e-11	6.9932	6.8741	6.6582	6.9045	7.4271	0	0	0	0	0		6.97142
Sf3a3	1.471e-10	2.85e-10	6.6467	7.4195	6.8667	7.3291	6.594	0	0	0	0	0		6.9712
Rad50	4.283e-09	5.874e-09	6.6921	7.1589	6.7682	7.8826	6.3487	0	0	0	0	0		6.9701
Glmn	3.719e-11	8.704e-11	6.5744	7.1908	7.2026	7.2192	6.6625	0	0	0	0	0		6.9699
Rbbp6	9.665e-11	1.966e-10	6.9658	7.354	6.9507	7.1819	6.3906	0	0	0	0	0		6.9686
Igf2r	4.131e-13	2.089e-12	6.975	7.0067	7.2172	6.9378	6.7032	0	0	0	0	0		6.96798
Rtn1	1.14e-05	1.237e-05	8.0682	7.4741	7.799	7.7642	9.1233	0	2.433	0	0	2.9635		6.96646
Mapkapk2	8.185e-16	1.802e-14	6.9658	7.0235	6.8342	6.9495	7.052	0	0	0	0	0		6.965
Rasa1	3.047e-10	5.379e-10	7.6344	6.9989	6.588	6.9669	6.6294	0	0	0	0	0		6.96352
Dpp3	4.823e-11	1.075e-10	10.419	10.587	10.733	10.556	10.656	3.3363	3.5484	3.6439	3.4594	4.1457		6.96346
Kirrel3	3.28e-12	1.124e-11	6.7787	7.2365	7.0725	7.0607	6.6539	0	0	0	0	0		6.96046
Kcnc1	5.823e-10	9.557e-10	7.2192	7.3318	6.7279	7.2517	6.2649	0	0	0	0	0		6.9591
Abhd17c	2.197e-09	3.183e-09	7.1477	7.4094	6.8227	7.3273	6.0853	0	0	0	0	0		6.95848
Plekho2	3.189e-15	4.72e-14	7.0466	6.939	6.9378	7.0542	6.8099	0	0	0	0	0		6.9575
Sf3a1	2.172e-10	4.016e-10	10.887	11.032	11.031	11	10.68	3.9355	4.3074	4.2705	3.3785	3.9635		6.95492
Hspa13	5.254e-12	1.672e-11	6.9932	6.9681	7.0224	7.2394	6.5469	0	0	0	0	0		6.954
4930407I10Rik	7.796e-10	1.243e-09	6.9472	7.56	7.0488	6.9542	6.2384	0	0	0	0	0		6.94972
Gatb	8.072e-14	5.686e-13	6.7892	6.991	6.896	7.1839	6.8875	0	0	0	0	0		6.94952
Ndrg2	1.278e-12	5.169e-12	11.793	12.023	11.788	11.896	11.895	4.7866	4.848	5.2055	4.7708	5.04		6.94882
Prkar1b	5.263e-12	1.674e-11	12.5	12.381	12.201	12.319	11.947	5.2441	5.406	5.1127	5.4229	5.4195		6.94856
Atp4a	2.343e-10	4.27e-10	7.5196	6.9248	6.4162	6.7879	7.0906	0	0	0	0	0		6.94782
Ipo4	5.436e-14	4.128e-13	6.7361	7.0067	6.9738	7.1189	6.8997	0	0	0	0	0		6.94704
Apoa4	2.303e-09	3.321e-09	6.3237	7.4902	6.9635	7.4684	6.4886	0	0	0	0	0		6.94688
Rell1	2.696e-12	9.558e-12	6.7576	7.2687	6.8278	7.1085	6.7616	0	0	0	0	0		6.94484
Itgb2	6.063e-11	1.31e-10	6.4611	7.1888	7.3156	6.991	6.7616	0	0	0	0	0		6.94362
Hmgxb4	3.765e-10	6.481e-10	6.9378	7.417	6.9704	7.1365	6.2536	0	0	0	0	0		6.94306
Sf3a1	2.266e-10	4.15e-10	10.887	11.019	11.021	10.985	10.657	3.9355	4.3074	4.2705	3.3785	3.9635		6.94272
Mvb12a	7.783e-10	1.242e-09	7.1799	7.3923	6.8851	7.0864	6.1659	0	0	0	0	0		6.94192
Serinc3	1.122e-11	3.205e-11	6.8099	6.7074	7.3837	6.7655	7.0235	0	0	0	0	0		6.938
Neto1	2.672e-14	2.27e-13	6.8099	6.9796	6.9117	7.1303	6.8304	0	0	0	0	0		6.93238
Diablo	2.962e-09	4.187e-09	6.487	7.5484	6.9296	7.4153	6.2798	0	0	0	0	0		6.93202
Myl9	8.039e-11	1.671e-10	6.9841	7.1293	6.9248	7.2649	6.3434	0	0	0	0	0		6.9293
Oxa1l	6.327e-11	1.358e-10	6.5376	6.9681	7.0056	6.6977	7.4346	0	0	0	0	0		6.92872
Ppp1r16a	2.603e-12	9.269e-12	7.1957	6.9366	6.9807	6.9692	6.5607	0	0	0	0	0		6.92858
Zfyve9	2.16e-11	5.52e-11	7.1396	7.2527	6.8112	6.9472	6.487	0	0	0	0	0		6.92754
Vars2	4.351e-12	1.427e-11	6.7361	7.0853	7.0704	7.1436	6.594	0	0	0	0	0		6.92588
Pank1	5.948e-12	1.861e-11	7.2873	6.8654	6.6424	6.7629	7.0607	0	0	0	0	0		6.92374
Bcs1l	3.608e-10	6.241e-10	7.029	6.588	6.8417	6.5546	7.6014	0	0	0	0	0		6.92294
Itga6	3.951e-10	6.755e-10	6.9189	7.2384	7.1283	7.1283	6.1759	0	0	0	0	0		6.91796
Mcfd2	3.638e-09	5.057e-09	7.6802	6.8405	6.3975	6.3716	7.2928	0	0	0	0	0		6.91652
Vps26b	1.364e-10	2.663e-10	6.4611	6.9425	6.7101	6.9864	7.4749	0	0	0	0	0		6.915
Lrsam1	2.198e-10	4.046e-10	7.0553	7.3794	6.7428	7.0477	6.3183	0	0	0	0	0		6.9087
Vezt	5.253e-10	8.711e-10	7.6914	6.8035	6.7482	6.6907	6.5969	0	0	0	0	0		6.90614
Prkar1a	1.039e-10	2.097e-10	11.902	11.959	11.797	11.912	11.506	4.8875	4.9495	5.1659	5.1538	4.3923		6.9054
Gspt2	8.935e-11	1.835e-10	6.3663	6.8716	7.121	7.312	6.8367	0	0	0	0	0		6.90152
Tbc1d5	2.59e-12	9.235e-12	6.7361	6.7415	6.7827	6.9738	7.2715	0	0	0	0	0		6.90112
Atl1	6.202e-11	1.336e-10	11.665	11.464	11.605	11.511	12.263	4.6323	4.8679	4.7602	4.8629	4.8826		6.90042
Slc27a1	1.962e-14	1.772e-13	7.0023	6.9189	6.8342	7.0224	6.7225	0	0	0	0	0		6.90006
Prrc1	4.49e-10	7.594e-10	6.8505	7.4561	6.8035	7.1169	6.2724	0	0	0	0	0		6.89988
Kbtbd11	2.155e-10	3.99e-10	6.975	7.3983	6.8278	7.0011	6.2965	0	0	0	0	0		6.89974
B4galnt1	1.747e-10	3.315e-10	6.5125	7.2983	7.0629	7.1649	6.4578	0	0	0	0	0		6.89928
Kcnip4	9.849e-14	6.597e-13	7.0201	6.8839	6.6977	6.8151	7.0715	0	0	0	0	0		6.89766
Nlrp1b	1.31e-07	1.537e-07	7.5932	7.5691	7.1568	6.7347	5.4229	0	0	0	0	0		6.89534
Ppfia3	4.951e-13	2.414e-12	12.801	12.726	12.701	12.746	12.601	6.029	5.8948	5.853	5.7629	5.5699		6.89308
Ireb2	4.644e-13	2.292e-12	6.7142	7.0123	6.9658	7.0864	6.6767	0	0	0	0	0		6.89108
Ssbp2	1.615e-13	9.73e-13	6.6921	6.8716	7.1303	6.9272	6.8163	0	0	0	0	0		6.8875
Tarsl2	3.054e-06	3.362e-06	9.1999	8.9941	9.0837	9.0699	9.4522	2.3219	2.6554	2.9819	0	3.406		6.88692
Washc1	1.669e-11	4.463e-11	6.7469	7.0875	7.0011	7.1477	6.4496	0	0	0	0	0		6.88656
Srek1ip1	1.534e-12	6.049e-12	7.2346	6.9307	6.7004	6.7996	6.7549	0	0	0	0	0		6.88404
Mal2	2.483e-10	4.48e-10	7.0201	7.246	6.9484	7.0056	6.1878	0	0	0	0	0		6.88158
Ppfia3	4.894e-13	2.393e-12	12.789	12.711	12.69	12.73	12.591	6.029	5.8948	5.853	5.7629	5.5699		6.88028
Rnf41	5.147e-08	6.211e-08	7.1799	7.4111	6.9296	7.3759	5.5046	0	0	0	0	0		6.88022
Med10	1.244e-09	1.895e-09	6.6118	7.3029	7.1117	7.2307	6.1375	0	0	0	0	0		6.87892
Akap8l	9.041e-15	9.913e-14	6.9841	6.7115	6.9784	6.879	6.8405	0	0	0	0	0		6.8787
Gng4	6.571e-13	3.014e-12	6.7469	6.8592	6.6511	7.1283	7.0034	0	0	0	0	0		6.87778
Rap1gap2	1.884e-11	4.94e-11	12.771	12.802	12.779	12.778	12.337	5.6177	6.0661	5.7576	5.6264	6.0179		6.87626
Shf	9.631e-13	4.056e-12	7.0896	6.9224	7.0101	6.7682	6.585	0	0	0	0	0		6.87506
Aldh1l2	6.416e-12	1.989e-11	7.2724	6.8061	6.6264	6.7032	6.9554	0	0	0	0	0		6.8727
Rpl37	8.334e-15	9.332e-14	7.0112	6.8654	6.7032	6.9093	6.8704	0	0	0	0	0		6.8719
Gpd1l	2.027e-12	7.585e-12	13.35	13.438	13.661	13.498	13.862	6.6162	6.7306	6.8176	6.7004	6.6059		6.86766
Mybbp1a	5.745e-11	1.253e-10	7.1396	6.591	7.1365	6.4229	7.04	0	0	0	0	0		6.866
Samd14	2.196e-10	4.044e-10	7.2114	7.0455	7.0444	6.8151	6.1997	0	0	0	0	0		6.86322
Herc1	9.068e-11	1.859e-10	7.2649	7.0906	6.7892	6.8392	6.3291	0	0	0	0	0		6.8626
9030624J02Rik	3.561e-11	8.408e-11	6.7576	7.3983	6.797	6.8022	6.5577	0	0	0	0	0		6.86256
Lyrm1	4.686e-10	7.875e-10	6.7892	7.2574	6.9784	7.1385	6.1477	0	0	0	0	0		6.86224
Arc	5.63e-14	4.257e-13	6.8304	6.8342	7.0629	6.8972	6.6724	0	0	0	0	0		6.85942
Pcdhb15	2.357e-12	8.555e-12	6.8802	7.0747	6.7748	7.0378	6.5188	0	0	0	0	0		6.85726
Tbcb	4.809e-11	1.072e-10	11.217	11.154	11.156	11.234	11.298	4.4396	4.1293	4.3854	3.991	4.8278		6.85718
Nme7	3.978e-11	9.201e-11	6.5622	7.1759	7.0157	7.0639	6.466	0	0	0	0	0		6.85674
Spock1	1.621e-09	2.405e-09	7.3602	7.1106	6.7428	7.0312	6.0334	0	0	0	0	0		6.85564
Col4a3bp	9.146e-17	3.816e-15	6.8505	6.784	6.9577	6.8417	6.8442	0	0	0	0	0		6.85562
Rnf7	5.833e-09	7.824e-09	7.2498	7.2826	6.7576	7.1344	5.8505	0	0	0	0	0		6.85498
Ctsb	3.309e-08	4.064e-08	12.018	11.595	12	11.806	12.158	5.2095	5.3001	5.2016	3.848	5.7442		6.85472
Eif3m	4.184e-10	7.117e-10	7.1878	7.2826	6.6294	6.9378	6.2327	0	0	0	0	0		6.85406
Tpgs1	1.462e-12	5.808e-12	7.098	7.0509	6.6668	6.7853	6.6525	0	0	0	0	0		6.8507
Rps4x	3.555e-11	8.399e-11	12.259	12.328	12.321	12.359	12.499	5.6724	5.2555	5.1579	5.5329	5.8972		6.85002
Dars2	3.389e-12	1.158e-11	6.6809	7.1609	6.8442	6.9887	6.5744	0	0	0	0	0		6.84982
Sntb1	3.087e-09	4.336e-09	6.588	7.4603	7.098	7.0564	6.029	0	0	0	0	0		6.84634
Dnajb14	1.582e-08	1.997e-08	6.6809	6.1759	6.8367	6.5546	7.9779	0	0	0	0	0		6.8452
Nol3	1.788e-11	4.735e-11	6.7892	7.1293	6.7032	7.1365	6.4643	0	0	0	0	0		6.8445
Coq8a	7.177e-11	1.515e-10	6.4611	7.2288	6.8691	7.1189	6.5251	0	0	0	0	0		6.8406
Hcn4	1.758e-11	4.668e-11	7.1639	6.5835	6.848	6.522	7.0853	0	0	0	0	0		6.84054
Fam185a	3.289e-13	1.737e-12	7.029	6.7996	6.8442	6.9542	6.5714	0	0	0	0	0		6.83968
Sirt2	9.543e-12	2.793e-11	10.772	11.001	10.888	10.77	10.597	4.0959	4.1457	3.6668	4.1293	3.797		6.83866
Iars2	2.315e-10	4.228e-10	11.481	11.738	11.546	11.588	11.487	4.0959	4.706	4.8074	5.0618	4.9955		6.83468
Cyth3	8.734e-12	2.586e-11	6.487	7.1033	6.7129	7.0928	6.7735	0	0	0	0	0		6.8339
Rlbp1	2.436e-11	6.106e-11	7.0811	7.029	6.797	6.9224	6.3327	0	0	0	0	0		6.83244
Ptbp3	1.956e-11	5.098e-11	7.2498	6.8617	6.7602	6.8505	6.433	0	0	0	0	0		6.83104
Il1rapl1	3.703e-11	8.682e-11	6.3237	6.8654	6.8367	6.9248	7.1938	0	0	0	0	0		6.82888
Os9	3.278e-11	7.84e-11	6.7787	7.1839	6.8617	6.9692	6.3416	0	0	0	0	0		6.82702
Ppp3ca	2.509e-12	8.984e-12	14.572	14.772	14.69	14.649	14.652	7.8304	7.6844	7.6007	7.9565	8.1344		6.82572
Fkbpl	8.451e-11	1.747e-10	6.9658	7.1001	6.7918	7.0312	6.2327	0	0	0	0	0		6.82432
Cux1	8.787e-09	1.147e-08	7.5992	7.0715	6.6482	6.9093	5.8875	0	0	0	0	0		6.82314
Mvd	2.239e-10	4.108e-10	7.0811	7.0323	6.7211	7.1022	6.1699	0	0	0	0	0		6.82132
Aatk	5.94e-13	2.783e-12	6.6352	7.0067	6.8138	7.0123	6.6323	0	0	0	0	0		6.82006
Taok3	2.046e-06	2.265e-06	8.1684	7.7177	7.5062	7.4975	7.6453	0	2	2.4594	0	0		6.81514
Spata33	2.707e-11	6.686e-11	6.7892	7.1054	6.9612	6.8972	6.3111	0	0	0	0	0		6.81282
Abca5	3.939e-10	6.744e-10	6.6921	7.321	6.7211	7.1085	6.2211	0	0	0	0	0		6.81276
Ggps1	3.667e-12	1.237e-11	6.6118	7.1809	6.5999	6.8265	6.8442	0	0	0	0	0		6.81266
[truncated: 3,078 more rows]

## Sheet: C-S
	p value	q value	Cortex	Cortex	Cortex	Cortex	Cortex	Straitum	Straitum	Straitum	Straitum	Straitum		Fold of Change
Slc1a3	6.148e-10	1.012e-09	13.377	12.299	12.478	12.284	14.225	0	0	0	0	0		12.9326
Shank1	8.551e-15	1.227e-13	12.764	12.963	12.798	12.881	12.422	0	0	0	0	0		12.7656
Shank1	8.385e-15	1.214e-13	12.764	12.959	12.796	12.88	12.42	0	0	0	0	0		12.7638
Hist1h1d	2.984e-13	1.93e-12	13.111	12.581	12.419	12.431	12.308	0	0	0	0	0		12.57
Rpl26	4.507e-17	2.941e-15	12.569	12.638	12.524	12.418	12.384	0	0	0	0	0		12.5066
Atp2a3	3.629e-12	1.378e-11	12.507	12.056	12.211	12.031	13.059	0	0	0	0	0		12.3728
Try10	5.062e-09	6.953e-09	13.872	12.41	12.109	12.506	10.901	0	0	0	0	0		12.3596
Scamp5	3.102e-13	1.987e-12	12.135	12.07	12.03	11.992	12.739	0	0	0	0	0		12.1932
Lrp1	1.826e-18	5.583e-16	12.291	12.201	12.144	12.159	12.114	0	0	0	0	0		12.1818
Ncam1	4.115e-12	1.526e-11	15.323	15.068	15.292	15.177	15.831	3.6893	3.2928	2.926	3.4463	3.0531		12.0567
Krt5	6.191e-09	8.388e-09	12.982	12.001	11.108	10.769	13.087	0	0	0	0	0		11.9894
Cpne6	1.51e-13	1.133e-12	11.703	11.613	12.078	11.934	12.294	0	0	0	0	0		11.9244
Nptxr	6.707e-20	7.09e-17	11.853	11.766	11.882	11.826	11.805	0	0	0	0	0		11.8264
Eif4g3	2.579e-16	1.01e-14	11.595	11.796	11.838	11.727	11.922	0	0	0	0	0		11.7756
Ryr2	4.596e-16	1.472e-14	11.721	11.564	11.494	11.502	11.779	0	0	0	0	0		11.612
Lars	1.447e-14	1.812e-13	11.551	11.476	11.557	11.5	11.964	0	0	0	0	0		11.6096
Grm3	2.294e-12	9.629e-12	11.738	11.344	11.338	11.274	12.161	0	0	0	0	0		11.571
Hspa1b	3.967e-13	2.402e-12	11.531	11.762	11.6	11.744	11.019	0	0	0	0	0		11.5312
Grin1	1.115e-12	5.395e-12	11.593	11.276	11.337	11.316	12.097	0	0	0	0	0		11.5238
Dlgap1	3.46e-16	1.225e-14	11.654	11.586	11.421	11.486	11.343	0	0	0	0	0		11.498
Eef1d	1.041e-14	1.414e-13	11.812	11.364	11.535	11.429	11.345	0	0	0	0	0		11.497
Rpl21	9.818e-17	4.989e-15	11.62	11.476	11.421	11.354	11.561	0	0	0	0	0		11.4864
Syt7	1.052e-11	3.261e-11	12.222	11.167	11.237	11.147	11.531	0	0	0	0	0		11.4608
Cpsf6	1.872e-11	5.196e-11	12.206	11.259	11.36	11.304	10.893	0	0	0	0	0		11.4044
Rpl21	2.303e-16	9.293e-15	11.498	11.339	11.319	11.234	11.5	0	0	0	0	0		11.378
Kif2a	2.336e-14	2.556e-13	11.351	11.246	11.243	11.248	11.728	0	0	0	0	0		11.3632
Plcl2	3.793e-18	6.912e-16	11.255	11.429	11.273	11.354	11.303	0	0	0	0	0		11.3228
Scn2a	2.7e-12	1.093e-11	11.329	11.09	11.149	11.052	11.964	0	0	0	0	0		11.3168
Hgs	5.165e-16	1.606e-14	11.392	11.205	11.211	11.162	11.452	0	0	0	0	0		11.2844
Myl12b	6.6e-15	1.026e-13	11.458	11.288	11.304	11.299	10.974	0	0	0	0	0		11.2646
Slc17a7	1.437e-09	2.175e-09	11.386	10.596	10.894	10.777	12.636	0	0	0	0	0		11.2578
Rasal1	7.193e-16	2.066e-14	11.122	11.101	11.066	11.278	11.377	0	0	0	0	0		11.1888
Inpp4a	1.063e-17	1.147e-15	11.054	11.249	11.202	11.194	11.111	0	0	0	0	0		11.162
Mecp2	7.585e-16	2.126e-14	11.123	11.04	11.302	11.029	11.295	0	0	0	0	0		11.1578
Exoc7	5.228e-15	8.85e-14	11.016	11.349	11.204	11.232	10.93	0	0	0	0	0		11.1462
Ckap4	7.553e-18	1.002e-15	11.183	11.028	11.065	11.076	11.194	0	0	0	0	0		11.1092
Gabra1	1.195e-12	5.698e-12	10.979	10.867	10.952	10.919	11.669	0	0	0	0	0		11.0772
Ndufaf2	6.291e-13	3.449e-12	10.991	11.357	11.204	11.219	10.571	0	0	0	0	0		11.0684
Rnf214	1.433e-15	3.321e-14	11.144	11.096	11.125	11.14	10.808	0	0	0	0	0		11.0626
Rpl32	1.108e-14	1.474e-13	11.261	11.175	11.007	11.093	10.777	0	0	0	0	0		11.0626
Rab11fip5	1.751e-13	1.266e-12	11.196	11.274	11.064	11.139	10.609	0	0	0	0	0		11.0564
Farp1	8.242e-16	2.281e-14	10.823	11.096	11.095	11.085	11.172	0	0	0	0	0		11.0542
Slc6a17	2.24e-11	6.03e-11	11.126	10.757	10.762	10.76	11.864	0	0	0	0	0		11.0538
Map7d1	1.228e-14	1.606e-13	11.288	11.077	10.898	11.094	10.806	0	0	0	0	0		11.0326
Fkbp3	2.408e-11	6.386e-11	11.03	11.403	11.238	11.283	10.2	0	0	0	0	0		11.0308
Psap	1.912e-12	8.337e-12	11.439	10.735	10.87	10.72	11.375	0	0	0	0	0		11.0278
Srsf2	1.431e-14	1.796e-13	11.311	11.026	10.976	10.856	10.838	0	0	0	0	0		11.0014
Mtdh	6.719e-16	1.973e-14	11.055	10.948	10.867	10.929	11.197	0	0	0	0	0		10.9992
Glg1	2.039e-13	1.429e-12	11.178	10.783	10.86	10.782	11.368	0	0	0	0	0		10.9942
Kalrn	1.681e-17	1.503e-15	10.895	11.056	10.876	10.927	11.032	0	0	0	0	0		10.9572
Akap7	1.905e-13	1.348e-12	11.073	10.828	10.811	10.654	11.321	0	0	0	0	0		10.9374
Rpl35	9.253e-18	1.048e-15	11.006	11.022	10.909	10.871	10.862	0	0	0	0	0		10.934
Rpl27	5.104e-16	1.596e-14	11.085	10.994	10.855	10.777	10.85	0	0	0	0	0		10.9122
Mprip	5.073e-17	3.123e-15	10.829	11.007	10.963	10.938	10.786	0	0	0	0	0		10.9046
Rapgef4	4.51e-16	1.453e-14	10.889	10.858	10.803	10.791	11.093	0	0	0	0	0		10.8868
Prrc2a	5.973e-15	9.595e-14	11.064	10.935	10.792	10.89	10.614	0	0	0	0	0		10.859
Eif4g1	1.063e-14	1.429e-13	10.887	10.798	10.732	10.711	11.156	0	0	0	0	0		10.8568
Mat2b	1.465e-15	3.382e-14	10.956	10.949	10.836	10.913	10.617	0	0	0	0	0		10.8542
Arhgap35	8.857e-17	4.826e-15	10.799	10.983	10.87	10.865	10.713	0	0	0	0	0		10.846
Cars	4.893e-17	3.078e-15	10.801	10.858	10.794	10.765	10.996	0	0	0	0	0		10.8428
Osbpl1a	6.815e-13	3.675e-12	10.863	10.636	10.727	10.595	11.344	0	0	0	0	0		10.833
Grin2a	6.835e-19	3.531e-16	10.85	10.817	10.862	10.741	10.876	0	0	0	0	0		10.8292
Ampd2	6.532e-15	1.021e-13	10.61	10.765	10.912	10.765	11.057	0	0	0	0	0		10.8218
Prr36	4.954e-12	1.782e-11	10.91	11.031	10.954	11.023	10.118	0	0	0	0	0		10.8072
Plxna4	2.348e-19	2.068e-16	10.794	10.742	10.819	10.785	10.871	0	0	0	0	0		10.8022
Gng13	8.905e-16	2.375e-14	10.751	10.613	10.836	10.745	10.971	0	0	0	0	0		10.7832
Pip4k2c	3.727e-16	1.276e-14	10.702	10.936	10.85	10.783	10.637	0	0	0	0	0		10.7816
Exoc1	4.605e-13	2.716e-12	10.772	10.59	10.723	10.552	11.27	0	0	0	0	0		10.7814
Sbf1	9.802e-17	4.989e-15	10.734	10.862	10.785	10.857	10.62	0	0	0	0	0		10.7716
Spock2	5.841e-15	9.411e-14	10.568	10.792	11.023	10.697	10.756	0	0	0	0	0		10.7672
Parp1	6.189e-15	9.823e-14	10.731	10.992	10.703	10.788	10.527	0	0	0	0	0		10.7482
Raph1	1.761e-14	2.097e-13	11.067	10.765	10.647	10.632	10.608	0	0	0	0	0		10.7438
Acot9	2.514e-16	9.99e-15	10.576	10.715	10.74	10.793	10.881	0	0	0	0	0		10.741
Rabgap1	2.624e-17	2.134e-15	10.585	10.746	10.763	10.682	10.8	0	0	0	0	0		10.7152
Ndel1	5.265e-17	3.199e-15	10.847	10.761	10.629	10.668	10.645	0	0	0	0	0		10.71
Ahsa1	2.224e-15	4.609e-14	10.478	10.742	10.834	10.811	10.632	0	0	0	0	0		10.6994
Pcdh9	1.128e-14	1.484e-13	10.664	10.923	10.729	10.741	10.425	0	0	0	0	0		10.6964
Hmgb2	4.066e-08	4.962e-08	12.739	9.9375	10.222	9.8395	10.686	0	0	0	0	0		10.6848
Bzw1	4.187e-12	1.547e-11	10.571	10.422	10.601	10.454	11.335	0	0	0	0	0		10.6766
Anxa11	6.942e-15	1.06e-13	10.587	10.82	10.783	10.767	10.42	0	0	0	0	0		10.6754
Vps13c	1.026e-13	8.484e-13	10.525	10.672	10.673	11.03	10.402	0	0	0	0	0		10.6604
Gad2	9.341e-14	7.919e-13	10.531	10.692	10.461	10.54	11.042	0	0	0	0	0		10.6532
Vars	1.041e-13	8.582e-13	10.732	10.507	10.534	10.442	11.023	0	0	0	0	0		10.6476
Psmd6	7.684e-14	6.814e-13	10.721	10.463	10.568	10.468	11.006	0	0	0	0	0		10.6452
Rgs6	8.617e-19	3.531e-16	10.658	10.628	10.552	10.611	10.699	0	0	0	0	0		10.6296
Apoa1	1.845e-15	3.996e-14	10.545	10.77	10.673	10.71	10.415	0	0	0	0	0		10.6226
Sms	5.601e-17	3.326e-15	10.487	10.592	10.739	10.599	10.649	0	0	0	0	0		10.6132
Gm10269	6.667e-18	9.762e-16	10.697	10.66	10.596	10.519	10.576	0	0	0	0	0		10.6096
Clstn1	3.006e-18	6.11e-16	10.686	10.571	10.671	10.57	10.549	0	0	0	0	0		10.6094
Ca4	9.933e-16	2.561e-14	10.423	10.619	10.607	10.59	10.793	0	0	0	0	0		10.6064
Tnks1bp1	1.8e-14	2.119e-13	10.896	10.639	10.552	10.565	10.377	0	0	0	0	0		10.6058
Exoc4	4.241e-15	7.624e-14	10.682	10.478	10.542	10.481	10.845	0	0	0	0	0		10.6056
Trim9	2.4e-12	9.955e-12	10.666	10.916	10.61	10.791	10.014	0	0	0	0	0		10.5994
Fermt2	2.215e-12	9.382e-12	10.961	10.329	10.402	10.293	10.97	0	0	0	0	0		10.591
Snrnp200	1.536e-15	3.499e-14	10.481	10.516	10.53	10.496	10.812	0	0	0	0	0		10.567
Huwe1	5.407e-15	8.958e-14	10.507	10.482	10.492	10.46	10.845	0	0	0	0	0		10.5572
Emc1	6.428e-19	3.531e-16	10.51	10.574	10.541	10.497	10.625	0	0	0	0	0		10.5494
Psmd13	1.568e-14	1.928e-13	10.484	10.427	10.543	10.423	10.867	0	0	0	0	0		10.5488
Rpl36a-ps1	3.963e-11	9.543e-11	11.212	10.215	10.272	10.101	10.923	0	0	0	0	0		10.5446
Cplx3	2.569e-14	2.771e-13	10.668	10.281	10.474	10.41	10.764	0	0	0	0	0		10.5194
Nampt	1.986e-16	8.603e-15	10.395	10.612	10.45	10.64	10.475	0	0	0	0	0		10.5144
Fcgbp	8.857e-09	1.169e-08	11.281	10.517	9.8953	9.2607	11.614	0	0	0	0	0		10.5136
Etf1	2.218e-18	5.583e-16	10.407	10.526	10.511	10.545	10.563	0	0	0	0	0		10.5104
Dctn6	9.322e-12	2.97e-11	10.65	10.78	10.629	10.672	9.7786	0	0	0	0	0		10.5019
Luzp1	2.144e-12	9.159e-12	10.764	10.724	10.467	10.566	9.9202	0	0	0	0	0		10.4882
Enah	8.34e-18	1.002e-15	10.501	10.454	10.545	10.54	10.373	0	0	0	0	0		10.4826
Raly	1.276e-12	6.023e-12	10.557	10.731	10.555	10.633	9.9266	0	0	0	0	0		10.4805
Dnm1l	2.701e-13	1.787e-12	13.532	13.552	13.606	13.565	13.979	3.263	3.3219	3.0179	3.3074	2.926		10.4796
Sh3glb1	1.462e-08	1.877e-08	11.277	11.4	11.15	11.336	10.841	1.585	0	0	2.0356	0		10.4767
Nploc4	9.719e-15	1.348e-13	10.28	10.603	10.644	10.551	10.301	0	0	0	0	0		10.4758
Rab3gap2	4.531e-18	7.725e-16	10.415	10.547	10.403	10.454	10.531	0	0	0	0	0		10.47
Mic13	1.004e-14	1.375e-13	10.354	10.595	10.581	10.569	10.207	0	0	0	0	0		10.4612
Dnm1l	3.142e-13	2.008e-12	13.515	13.522	13.584	13.536	13.968	3.263	3.3219	3.0179	3.3074	2.926		10.4578
Cep170b	1.608e-14	1.963e-13	10.593	10.538	10.451	10.554	10.141	0	0	0	0	0		10.4554
Cd34	1.92e-11	5.294e-11	10.981	10.169	10.118	10.102	10.898	0	0	0	0	0		10.4536
Wipf2	2.803e-12	1.125e-11	10.559	10.559	10.658	10.648	9.831	0	0	0	0	0		10.451
Dnajc19	1.562e-12	7.112e-12	10.551	10.661	10.528	10.626	9.875	0	0	0	0	0		10.4482
Samm50	3.856e-11	9.332e-11	10.518	10.105	10.149	10.201	11.267	0	0	0	0	0		10.448
Cspg5	7.436e-14	6.727e-13	10.618	10.516	10.097	10.339	10.618	0	0	0	0	0		10.4376
Zfp638	6.339e-15	1.003e-13	10.61	10.49	10.4	10.419	10.166	0	0	0	0	0		10.417
Apex1	7.287e-18	1.002e-15	10.322	10.432	10.398	10.358	10.503	0	0	0	0	0		10.4026
Flna	1.338e-15	3.171e-14	10.358	10.513	10.443	10.506	10.19	0	0	0	0	0		10.402
Ccdc88a	4.739e-14	4.656e-13	10.501	10.562	10.376	10.451	10.032	0	0	0	0	0		10.3844
Scn2b	1.377e-09	2.091e-09	10.661	9.8361	9.94	9.8711	11.588	0	0	0	0	0		10.3792
Ubfd1	1.683e-13	1.232e-12	10.577	10.518	10.411	10.424	9.9583	0	0	0	0	0		10.3777
Capn2	1.219e-14	1.599e-13	10.318	10.371	10.283	10.224	10.674	0	0	0	0	0		10.374
Arl8b	2.319e-13	1.59e-12	10.423	10.247	10.186	10.199	10.791	0	0	0	0	0		10.3692
Tomm34	3.183e-16	1.16e-14	10.403	10.28	10.336	10.278	10.546	0	0	0	0	0		10.3686
Camkk2	6.476e-16	1.927e-14	10.51	10.343	10.265	10.237	10.472	0	0	0	0	0		10.3654
Fhl2	2.671e-11	6.956e-11	10.513	10.769	10.464	10.493	9.5683	0	0	0	0	0		10.3615
Camk2n1	5.7e-12	1.996e-11	10.778	10.603	10.203	10.421	9.8011	0	0	0	0	0		10.3612
Dnajb1	3.254e-14	3.385e-13	10.592	10.36	10.327	10.469	10.058	0	0	0	0	0		10.3612
Paics	5.123e-13	2.962e-12	10.453	10.1	10.239	10.148	10.783	0	0	0	0	0		10.3446
Car4	2.829e-15	5.508e-14	10.106	10.369	10.368	10.348	10.509	0	0	0	0	0		10.34
Vars	3.931e-14	3.965e-13	10.413	10.196	10.228	10.126	10.626	0	0	0	0	0		10.3178
Lysmd1	3.874e-13	2.378e-12	10.538	10.475	10.316	10.389	9.8567	0	0	0	0	0		10.3149
Stub1	1.935e-14	2.218e-13	10.313	10.505	10.36	10.356	10.003	0	0	0	0	0		10.3074
Camkk2	4.373e-16	1.418e-14	10.429	10.265	10.207	10.156	10.379	0	0	0	0	0		10.2872
Kiaa1549	1.582e-14	1.939e-13	10.567	10.312	10.098	10.164	10.281	0	0	0	0	0		10.2844
Sec23a	1.938e-16	8.463e-15	10.334	10.276	10.122	10.272	10.403	0	0	0	0	0		10.2814
Myo6	6.434e-16	1.927e-14	10.13	10.336	10.213	10.261	10.446	0	0	0	0	0		10.2772
Sord	9.688e-14	8.14e-13	10.158	10.461	10.32	10.49	9.9479	0	0	0	0	0		10.2754
Sec14l2	8.32e-18	1.002e-15	10.208	10.372	10.254	10.251	10.195	0	0	0	0	0		10.256
Nudcd3	1.678e-14	2.021e-13	10.072	10.35	10.431	10.367	10.043	0	0	0	0	0		10.2526
Acaa1a	9.286e-12	2.96e-11	10.347	10.527	10.208	10.538	9.5689	0	0	0	0	0		10.2378
Snx5	5.553e-12	1.958e-11	10.889	10.088	10.061	9.9847	10.113	0	0	0	0	0		10.2271
Tmx2	3.872e-11	9.352e-11	10.318	9.88	10.003	9.9055	11.016	0	0	0	0	0		10.2245
Chl1	4.091e-10	7.075e-10	11.041	10.358	10.129	10.315	9.2595	0	0	0	0	0		10.2205
Usp7	3.856e-14	3.911e-13	10.19	10.187	10.005	10.142	10.545	0	0	0	0	0		10.2138
Timm8a1	6.566e-11	1.451e-10	10.262	10.683	10.251	10.462	9.3518	0	0	0	0	0		10.202
Gcn1	7.073e-16	2.043e-14	10.055	10.318	10.202	10.312	10.093	0	0	0	0	0		10.196
Gorasp2	7.758e-13	4.044e-12	10.122	10.395	10.386	10.339	9.7103	0	0	0	0	0		10.1905
Lrrc47	2.196e-09	3.21e-09	10.763	10.65	10.496	10.645	10.016	0	0	1.6323	0	0		10.1875
Hmox2	2.918e-17	2.302e-15	10.184	10.16	10.059	10.218	10.28	0	0	0	0	0		10.1802
Rpl18a	7.817e-12	2.566e-11	10.354	9.9491	9.8733	9.8734	10.753	0	0	0	0	0		10.1606
Tars	2.612e-14	2.811e-13	10.244	10.114	9.9492	10.047	10.438	0	0	0	0	0		10.1584
Dnal1	2.358e-12	9.815e-12	10.065	10.416	10.246	10.417	9.6173	0	0	0	0	0		10.1523
Echdc1	1.767e-12	7.914e-12	10.069	10.397	10.336	10.334	9.6253	0	0	0	0	0		10.1523
Ehbp1	6.88e-14	6.346e-13	10.27	10.298	10.146	10.226	9.7753	0	0	0	0	0		10.1431
Nedd4l	8.066e-12	2.635e-11	10.018	10.58	10.162	10.344	9.549	0	0	0	0	0		10.1306
Cdkl5	2.737e-13	1.802e-12	10.201	10.324	10.078	10.316	9.7096	0	0	0	0	0		10.1257
Acaa1a	8.214e-12	2.676e-11	10.264	10.391	10.092	10.41	9.47	0	0	0	0	0		10.1254
Camsap3	4.47e-14	4.416e-13	10.175	10.253	10.136	10.278	9.7777	0	0	0	0	0		10.1239
Sec23ip	1.763e-18	5.583e-16	10.169	10.146	10.175	10.059	10.065	0	0	0	0	0		10.1228
Hmgcs1	5.822e-15	9.411e-14	9.9517	10.022	10.174	10.088	10.357	0	0	0	0	0		10.1185
Arhgap5	5.275e-15	8.85e-14	10.174	10.107	9.9736	9.9827	10.348	0	0	0	0	0		10.1171
Rasgrf2	3.295e-14	3.408e-13	10.062	10.065	9.9827	9.9738	10.444	0	0	0	0	0		10.1055
Ppm1e	9.377e-13	4.697e-12	10.272	9.9372	9.8564	9.8894	10.533	0	0	0	0	0		10.0976
Slc39a10	5.778e-15	9.397e-14	10.127	9.9776	10.026	9.9736	10.346	0	0	0	0	0		10.09
Grk2	8.605e-12	2.785e-11	10.682	10.141	9.9623	10.027	9.6108	0	0	0	0	0		10.0846
Gtf2i	1.465e-16	6.85e-15	10.009	10.202	10.133	10.108	9.9577	0	0	0	0	0		10.0819
Mrps22	1.23e-11	3.707e-11	10.692	10.099	10.042	10.025	9.5502	0	0	0	0	0		10.0816
Acap2	3.274e-14	3.399e-13	10.245	9.9552	9.9667	9.8693	10.303	0	0	0	0	0		10.0678
Mccc2	1.109e-15	2.772e-14	10.002	10.168	10.126	10.159	9.873	0	0	0	0	0		10.0656
Snx27	9.447e-17	4.95e-15	10.149	9.9437	10.087	9.9766	10.134	0	0	0	0	0		10.0581
Tenm4	2.068e-17	1.792e-15	10.094	10.125	10.08	10.033	9.9284	0	0	0	0	0		10.0521
Plxna1	3.706e-17	2.674e-15	10.078	9.9405	9.9919	10.061	10.155	0	0	0	0	0		10.0453
NOGENE	8.088e-11	1.728e-10	13.727	13.977	13.99	14.144	13.431	3.1859	4.3785	3.8679	3.9449	3.7866		10.021
Top1	3.069e-15	5.877e-14	10.095	10.193	9.9895	10.012	9.8074	0	0	0	0	0		10.0194
Camsap1	1.587e-15	3.568e-14	10.042	10.187	9.9575	10.054	9.8305	0	0	0	0	0		10.0142
Stoml2	7.949e-14	6.99e-13	10.272	10.097	9.9264	10.053	9.6951	0	0	0	0	0		10.0087
Fdps	1.938e-11	5.331e-11	9.9259	9.6555	9.9006	9.8123	10.748	0	0	0	0	0		10.0085
Cops5	1.192e-16	5.887e-15	9.869	9.9986	10.126	10.057	9.9854	0	0	0	0	0		10.0072
Plcg1	8.262e-18	1.002e-15	10.003	10.087	9.9767	10.049	9.9093	0	0	0	0	0		10.005
Exoc5	5.25e-15	8.85e-14	9.7532	10.016	10.092	10.002	10.153	0	0	0	0	0		10.0032
Chgb	1.086e-10	2.23e-10	10.031	10.46	10.171	10.253	9.0972	0	0	0	0	0		10.0024
Stxbp5l	2.079e-15	4.396e-14	10.043	10.165	9.9565	10.019	9.7934	0	0	0	0	0		9.99538
Pex5l	1.341e-12	6.257e-12	9.9853	10.285	9.9695	10.214	9.5062	0	0	0	0	0		9.992
Vcpip1	1.106e-17	1.169e-15	10.06	9.9922	9.9245	9.904	10.049	0	0	0	0	0		9.98594
Sfxn5	2.634e-16	1.024e-14	10.088	9.9986	9.8015	9.9982	9.9757	0	0	0	0	0		9.9724
Pzp	6.693e-15	1.031e-13	10.198	9.9829	9.9935	9.916	9.7632	0	0	0	0	0		9.97072
Rnf14	3.943e-13	2.398e-12	9.8959	9.6842	10.037	9.8489	10.378	0	0	0	0	0		9.9688
M6pr	1.402e-11	4.127e-11	10.011	9.5945	9.9546	9.6561	10.622	0	0	0	0	0		9.96764
Fau	1.423e-12	6.583e-12	10.327	9.8975	9.7625	9.6071	10.231	0	0	0	0	0		9.96502
Sec24c	2.039e-15	4.328e-14	10.125	9.8342	9.9371	9.8398	10.082	0	0	0	0	0		9.96362
Thumpd1	1.104e-13	9.003e-13	10.314	10.026	9.8927	9.7398	9.837	0	0	0	0	0		9.9619
Numa1	4.359e-13	2.6e-12	10.041	10.215	9.9042	10.096	9.5292	0	0	0	0	0		9.95708
Prickle2	1.678e-16	7.621e-15	9.9341	9.9821	9.9927	10.066	9.8003	0	0	0	0	0		9.95504
Elfn2	4.741e-15	8.27e-14	9.7731	10.009	10.092	10.074	9.8103	0	0	0	0	0		9.95168
Cdc42bpa	2.38e-17	2.029e-15	10.049	10.007	9.9144	9.9259	9.8549	0	0	0	0	0		9.95024
C1qb	1.458e-16	6.85e-15	9.9151	9.9238	9.8163	10.018	10.065	0	0	0	0	0		9.94764
Setd2	6.989e-07	7.87e-07	10.738	8.4429	9.5397	8.6703	12.305	0	0	0	0	0		9.93918
Sf3b2	7.193e-15	1.087e-13	10.193	9.8098	9.8094	9.9574	9.9048	0	0	0	0	0		9.93488
Dmwd	9.134e-15	1.289e-13	9.8477	10.102	9.94	10.065	9.7046	0	0	0	0	0		9.93186
Dnajc3	1.074e-15	2.715e-14	9.8464	10.03	10.008	10.009	9.7502	0	0	0	0	0		9.92872
Acyp2	1.682e-13	1.232e-12	9.9588	10.106	10.027	10.029	9.5204	0	0	0	0	0		9.92824
Iqsec2	1.236e-17	1.24e-15	9.9506	9.9829	9.831	9.8773	9.9963	0	0	0	0	0		9.92762
Reps1	6.097e-15	9.707e-14	10.143	9.923	9.8452	9.9781	9.7286	0	0	0	0	0		9.92358
Gnao1	1.389e-09	2.108e-09	9.9898	9.2978	9.7717	9.4126	11.112	0	0	0	0	0		9.91678
Wdr48	4.796e-21	8.45e-18	9.9482	9.8962	9.9108	9.8773	9.8938	0	0	0	0	0		9.90526
Fsd1	8.258e-18	1.002e-15	9.9259	9.8485	9.8544	9.8725	10.01	0	0	0	0	0		9.90226
Cpsf7	5.111e-12	1.828e-11	9.8947	10.159	10.066	10.103	9.2877	0	0	0	0	0		9.90208
Maip1	1.902e-12	8.302e-12	10.25	10.101	9.8616	9.881	9.4166	0	0	0	0	0		9.90204
Taco1	7.99e-15	1.176e-13	10.122	9.8027	9.7388	9.7853	9.9669	0	0	0	0	0		9.88314
Fam81a	2.093e-15	4.408e-14	10.06	9.9542	9.8098	9.8425	9.7125	0	0	0	0	0		9.8758
Nrd1	3.14e-14	3.285e-13	9.933	9.7559	9.7607	9.7462	10.183	0	0	0	0	0		9.87576
Atp6v1g1	6.33e-14	5.953e-13	10.152	9.7918	9.7616	9.629	9.9864	0	0	0	0	0		9.86416
Slc9a1	2.011e-16	8.635e-15	9.9565	9.8035	9.8383	9.7415	9.9744	0	0	0	0	0		9.86284
Eif4g2	4.068e-15	7.42e-14	9.8727	9.8043	9.7136	9.8028	10.099	0	0	0	0	0		9.85848
Ccdc177	8.962e-12	2.883e-11	10.33	10.046	9.6893	9.9037	9.3156	0	0	0	0	0		9.85692
Ndrg3	5.718e-15	9.327e-14	9.8211	10.076	9.8438	9.8894	9.6523	0	0	0	0	0		9.85652
Ahsg	4.306e-13	2.574e-12	10.052	9.9223	9.9498	9.9541	9.3966	0	0	0	0	0		9.85496
Psme1	6.768e-16	1.976e-14	9.8776	9.748	9.781	9.8069	10.041	0	0	0	0	0		9.8509
Aida	2.74e-12	1.105e-11	9.6242	10.071	10.105	10.052	9.3742	0	0	0	0	0		9.84528
Ubr4	9.105e-16	2.401e-14	9.6719	9.8007	9.8438	9.8316	10.009	0	0	0	0	0		9.8314
Cryl1	8.377e-13	4.315e-12	9.6417	9.9975	9.9619	10.103	9.4246	0	0	0	0	0		9.82574
Ccdc93	1.365e-13	1.051e-12	10.104	9.7272	9.6388	9.6221	10.023	0	0	0	0	0		9.82302
Dag1	4.718e-13	2.767e-12	10.047	10.006	9.7907	9.8127	9.3846	0	0	0	0	0		9.8082
Mtor	3.318e-19	2.505e-16	9.8452	9.8453	9.8216	9.744	9.7777	0	0	0	0	0		9.80676
Rbm26	1.096e-12	5.327e-12	9.9646	9.9857	9.8707	9.896	9.2859	0	0	0	0	0		9.80058
Prex1	4.076e-16	1.346e-14	9.6402	9.9175	9.7517	9.8147	9.873	0	0	0	0	0		9.79942
Rap1gds1	5.05e-09	6.937e-09	9.8825	9.1619	9.5192	9.2167	11.212	0	0	0	0	0		9.79846
Rims3	1.254e-10	2.529e-10	9.7532	10.305	9.9325	10.063	8.9218	0	0	0	0	0		9.7951
Metap2	1.452e-13	1.096e-12	9.9318	9.6471	9.5938	9.6408	10.111	0	0	0	0	0		9.7849
Gabra3	1.348e-14	1.733e-13	9.5782	9.6595	9.8574	9.8083	10.005	0	0	0	0	0		9.78168
Scg5	1.856e-11	5.161e-11	9.6417	10.155	9.9157	10.04	9.1153	0	0	0	0	0		9.77354
Ranbp3	4.079e-14	4.099e-13	9.7967	9.871	9.8489	9.9049	9.4338	0	0	0	0	0		9.77106
Dnaja4	1.792e-14	2.119e-13	9.8389	9.5676	9.8189	9.6277	9.999	0	0	0	0	0		9.77042
Gm20498	1.407e-13	1.074e-12	10.069	9.5364	9.6607	9.6312	9.9335	0	0	0	0	0		9.76616
Hibch	9.288e-08	1.104e-07	10.906	11.353	11.107	11.223	10.643	2.2327	1.926	0	0	2.263		9.76206
Gabbr1	6.287e-11	1.4e-10	9.6888	9.4648	9.5925	9.4298	10.597	0	0	0	0	0		9.75458
Arfgef2	1.671e-14	2.017e-13	9.6846	9.7184	9.6954	9.5982	10.045	0	0	0	0	0		9.74832
Psmd5	1.994e-11	5.447e-11	9.4168	10.225	9.803	10.052	9.2346	0	0	0	0	0		9.74628
Hdgfl2	8.881e-16	2.375e-14	9.8186	9.8329	9.7723	9.7612	9.5388	0	0	0	0	0		9.74476
Capns1	7.585e-11	1.639e-10	9.927	9.3992	9.4751	9.3748	10.525	0	0	0	0	0		9.74022
Acot11	1.895e-14	2.197e-13	9.7437	9.7846	9.4973	9.6819	9.9796	0	0	0	0	0		9.73742
Frrs1l	3.072e-12	1.206e-11	9.5962	9.9927	10.04	9.8104	9.2348	0	0	0	0	0		9.73482
Ralbp1	2.299e-14	2.536e-13	9.7771	9.6534	9.6478	9.5531	10.015	0	0	0	0	0		9.72928
Chga	2.956e-14	3.137e-13	9.7705	9.7015	9.9743	9.7322	9.4588	0	0	0	0	0		9.72746
Son	2.877e-16	1.102e-14	9.726	9.858	9.7259	9.7529	9.5695	0	0	0	0	0		9.72646
Dctn5	5.325e-16	1.646e-14	9.8389	9.7991	9.6478	9.7567	9.5693	0	0	0	0	0		9.72236
Slc7a8	7.508e-11	1.625e-10	9.8122	9.3737	9.5716	9.2976	10.517	0	0	0	0	0		9.71442
Ccdc91	2.927e-15	5.626e-14	9.8813	9.7612	9.6525	9.7337	9.5098	0	0	0	0	0		9.7077
Gm11361	7.357e-15	1.105e-13	9.7679	9.6049	9.5645	9.6514	9.9476	0	0	0	0	0		9.70726
Rab33a	8.819e-15	1.253e-13	9.4269	9.7766	9.7539	9.7189	9.8264	0	0	0	0	0		9.70054
Ptges2	8.409e-16	2.303e-14	9.5068	9.7356	9.7142	9.7156	9.8278	0	0	0	0	0		9.7
Snw1	1.604e-13	1.192e-12	9.8552	9.8816	9.719	9.7286	9.3156	0	0	0	0	0		9.7
Sf3b6	2.42e-11	6.408e-11	9.9875	10.012	9.7117	9.8151	8.9721	0	0	0	0	0		9.69968
Xpo7	1.496e-16	6.933e-15	9.6199	9.8588	9.6858	9.691	9.6363	0	0	0	0	0		9.69836
Ccdc25	8.192e-15	1.193e-13	9.8539	9.6699	9.8489	9.6321	9.4844	0	0	0	0	0		9.69784
Ociad2	1.522e-14	1.882e-13	9.6577	9.9124	9.6685	9.7912	9.459	0	0	0	0	0		9.69776
Eri3	3.201e-12	1.249e-11	9.4369	9.4643	9.7781	9.5548	10.232	0	0	0	0	0		9.69322
Kcnb1	2.216e-13	1.529e-12	9.6902	9.9999	9.7465	9.6877	9.3381	0	0	0	0	0		9.69248
Sort1	1.539e-12	7.016e-12	9.5736	9.5157	9.6862	9.4652	10.207	0	0	0	0	0		9.68954
gB	4.241e-07	4.823e-07	9.3772	10.659	10.689	10.45	7.2536	0	0	0	0	0		9.68576
Akr7a2	2.038e-12	8.792e-12	9.5275	9.8875	9.8072	9.969	9.2092	0	0	0	0	0		9.68008
Arl6ip5	4.081e-11	9.782e-11	9.284	9.4309	9.6485	9.5708	10.447	0	0	0	0	0		9.67624
Atxn10	8.08e-14	7.082e-13	9.8489	9.7994	9.7269	9.6666	9.3226	0	0	0	0	0		9.67288
Rasa3	7.963e-18	1.002e-15	9.7546	9.68	9.6786	9.653	9.5721	0	0	0	0	0		9.66766
Slc9a1	3.45e-14	3.554e-13	9.7718	9.4723	9.6724	9.4836	9.9052	0	0	0	0	0		9.66106
Tbc1d24	8.677e-17	4.777e-15	9.6958	9.5986	9.6257	9.5765	9.7941	0	0	0	0	0		9.65814
Rcan1	8.231e-13	4.261e-12	10.111	9.5852	9.5351	9.6242	9.3735	0	0	0	0	0		9.6458
Ptprn2	2.976e-16	1.123e-14	9.6373	9.5765	9.7247	9.7458	9.4994	0	0	0	0	0		9.63674
Uhrf1bp1l	8.273e-15	1.201e-13	9.4568	9.7497	9.5477	9.5708	9.8353	0	0	0	0	0		9.63206
Chtop	3.85e-12	1.447e-11	9.8006	9.9091	9.4981	9.8275	9.0951	0	0	0	0	0		9.62608
Adgrb1	6.076e-18	9.175e-16	9.6433	9.6992	9.5498	9.5687	9.6596	0	0	0	0	0		9.62412
Jph3	8.813e-14	7.598e-13	9.8186	9.5876	9.4448	9.3981	9.8525	0	0	0	0	0		9.62032
Suox	3.889e-14	3.937e-13	9.7124	9.7413	9.6851	9.6719	9.2854	0	0	0	0	0		9.61922
Nf1	2.648e-14	2.837e-13	9.5306	9.4838	9.6537	9.4988	9.9144	0	0	0	0	0		9.61626
Txnrd2	3.261e-15	6.2e-14	9.5584	9.7604	9.6355	9.7048	9.4064	0	0	0	0	0		9.6131
Syn1	7.783e-14	6.89e-13	15.755	15.824	15.719	15.918	15.682	6.3558	6.263	6.2555	6.0682	5.8997		9.61116
Supt16	1.328e-14	1.711e-13	9.7612	9.567	9.5337	9.3872	9.7781	0	0	0	0	0		9.60544
Mpc1	8.968e-12	2.883e-11	9.3527	9.4508	9.6475	9.3387	10.232	0	0	0	0	0		9.60434
Homer2	1.465e-13	1.104e-12	9.7889	9.4639	9.4085	9.4605	9.8953	0	0	0	0	0		9.60342
Crip1	4.599e-13	2.716e-12	9.5917	9.8286	9.6984	9.6814	9.1596	0	0	0	0	0		9.59194
Endog	1.99e-11	5.44e-11	9.9807	9.8549	9.4592	9.6926	8.9402	0	0	0	0	0		9.58552
Kcnma1	2.387e-12	9.916e-12	9.4682	9.4658	9.4011	9.4157	10.137	0	0	0	0	0		9.57756
Cyp46a1	4.28e-13	2.562e-12	9.5147	9.4338	9.4164	9.4909	10.023	0	0	0	0	0		9.57576
Mia3	1.314e-14	1.698e-13	9.781	9.6059	9.5954	9.5621	9.3233	0	0	0	0	0		9.57354
Fmnl2	1.712e-15	3.766e-14	9.3562	9.644	9.5723	9.6127	9.6772	0	0	0	0	0		9.57248
Tmpo	2.201e-15	4.58e-14	9.6577	9.5586	9.394	9.509	9.7315	0	0	0	0	0		9.57016
Sart1	6.766e-13	3.652e-12	9.7625	9.7967	9.5028	9.6352	9.1339	0	0	0	0	0		9.56622
Fsd1l	1.387e-15	3.244e-14	9.5721	9.6325	9.5308	9.708	9.3785	0	0	0	0	0		9.56438
Srsf7	5.621e-11	1.274e-10	10.13	9.2808	9.1163	9.2745	9.9927	0	0	0	0	0		9.55886
Mgll	2.136e-13	1.483e-12	9.46	9.5628	9.3425	9.4755	9.9479	0	0	0	0	0		9.55774
Nmt2	3.208e-11	8.024e-11	9.8898	9.1916	9.4321	9.1161	10.103	0	0	0	0	0		9.54652
Apoa2	1.396e-11	4.117e-11	9.2444	9.7619	9.8594	9.8466	9.0129	0	0	0	0	0		9.54504
Strbp	1.616e-16	7.427e-15	9.6359	9.582	9.4164	9.4729	9.6099	0	0	0	0	0		9.54342
Ajm1	2.265e-11	6.082e-11	10.143	9.6055	9.4407	9.524	8.983	0	0	0	0	0		9.53924
Gpc4	1.249e-13	9.955e-13	9.2747	9.6717	9.5941	9.7881	9.3531	0	0	0	0	0		9.53634
Hdac6	1.717e-15	3.766e-14	9.326	9.5434	9.5554	9.6652	9.5893	0	0	0	0	0		9.53586
Pcsk2	2.445e-17	2.051e-15	9.6344	9.4872	9.4392	9.5421	9.5622	0	0	0	0	0		9.53302
Mcee	5.228e-13	3.005e-12	9.563	9.8043	9.5131	9.6666	9.115	0	0	0	0	0		9.5324
Gsk3a	1.546e-15	3.507e-14	9.4518	9.7189	9.4073	9.5898	9.4864	0	0	0	0	0		9.53084
Nup98	6.64e-12	2.265e-11	9.6021	9.766	9.6023	9.7577	8.9081	0	0	0	0	0		9.52724
Sel1l	1.039e-12	5.104e-12	9.6125	9.3949	9.3547	9.2623	9.9658	0	0	0	0	0		9.51804
Abhd11	4.439e-12	1.619e-11	9.4235	9.8216	9.6851	9.6404	8.9603	0	0	0	0	0		9.50618
Nos1	1.215e-08	1.577e-08	9.6228	9.8648	9.9917	10.078	9.9705	2	0	0	0	0		9.50556
Htatsf1	7.57e-17	4.256e-15	9.6417	9.4592	9.4778	9.484	9.4183	0	0	0	0	0		9.4962
Tbr1	5.524e-11	1.256e-10	9.563	9.8702	9.5603	9.7514	8.6973	0	0	0	0	0		9.48844
Ndufa1	2.98e-13	1.93e-12	9.5337	9.7542	9.1503	9.6335	9.3401	0	0	0	0	0		9.48236
Gabbr2	4.473e-13	2.654e-12	9.4828	9.3815	9.2958	9.3354	9.9159	0	0	0	0	0		9.48228
Emb	1.994e-14	2.266e-13	9.711	9.587	9.3226	9.4242	9.3246	0	0	0	0	0		9.47388
Dnajb2	6.438e-15	1.016e-13	9.5554	9.4907	9.5823	9.503	9.2121	0	0	0	0	0		9.4687
Srp68	8.817e-16	2.375e-14	9.5036	9.4543	9.3805	9.3531	9.6444	0	0	0	0	0		9.46718
Slc25a23	2.216e-16	9.152e-15	9.3367	9.5349	9.3848	9.5486	9.52	0	0	0	0	0		9.465
Ptprj	1.703e-17	1.503e-15	9.4151	9.5662	9.3975	9.4369	9.5086	0	0	0	0	0		9.46486
Ube3a	4.469e-17	2.941e-15	9.41	9.4204	9.5674	9.3887	9.5283	0	0	0	0	0		9.46296
Tgm2	8.287e-13	4.277e-12	9.2877	9.746	9.5687	9.6151	9.0752	0	0	0	0	0		9.45854
Cetn2	1e-11	3.133e-11	9.8288	9.1589	9.3661	9.0607	9.8549	0	0	0	0	0		9.45388
Ppih	9.919e-19	3.531e-16	9.4715	9.3602	9.4792	9.4496	9.4688	0	0	0	0	0		9.44586
Vps33a	1.281e-13	1.006e-12	9.1378	9.4858	9.4578	9.4022	9.7393	0	0	0	0	0		9.44458
Fmn2	7.016e-17	4.075e-15	9.365	9.5506	9.4596	9.4854	9.3509	0	0	0	0	0		9.4423
Ppp1r12b	3.848e-13	2.365e-12	9.6605	9.6591	9.3412	9.451	9.0709	0	0	0	0	0		9.43654
Pds5b	3.088e-14	3.238e-13	9.7082	9.3785	9.3833	9.2213	9.4892	0	0	0	0	0		9.4361
Prmt5	2.296e-15	4.703e-14	9.4909	9.3291	9.2958	9.4143	9.6173	0	0	0	0	0		9.42948
Krt42	3.282e-09	4.642e-09	10.177	8.9975	8.8713	8.7539	10.343	0	0	0	0	0		9.42854
Satb2	3.268e-13	2.067e-12	9.4066	9.7096	9.4494	9.524	9.0496	0	0	0	0	0		9.42784
Pum1	4.88e-17	3.078e-15	9.5163	9.3456	9.505	9.3776	9.3757	0	0	0	0	0		9.42404
Tpm3	7.432e-12	2.472e-11	9.4909	9.766	9.5042	9.5388	8.8183	0	0	0	0	0		9.42364
Tmx4	7.299e-15	1.099e-13	9.1742	9.4369	9.5236	9.4157	9.5552	0	0	0	0	0		9.42112
Hacd3	9.622e-10	1.518e-09	9.6359	8.9893	9.1051	8.8906	10.473	0	0	0	0	0		9.41878
Neo1	6.641e-15	1.029e-13	9.4151	9.5573	9.3047	9.5567	9.2279	0	0	0	0	0		9.41234
Golga2	1.742e-13	1.261e-12	9.5584	9.5137	9.421	9.5368	9.024	0	0	0	0	0		9.41078
Dhx15	6.152e-14	5.827e-13	9.6747	9.2831	9.2953	9.2317	9.5561	0	0	0	0	0		9.40818
Cisd2	9.863e-13	4.892e-12	9.6548	9.207	9.2446	9.1614	9.749	0	0	0	0	0		9.40336
Pepd	2.895e-12	1.152e-11	9.3006	9.6222	9.4929	9.6877	8.9015	0	0	0	0	0		9.40098
Rbp1	2.265e-10	4.213e-10	9.6373	8.9072	9.0872	9.1132	10.243	0	0	0	0	0		9.39758
Mast1	3.628e-17	2.663e-15	9.3024	9.4359	9.4002	9.501	9.3476	0	0	0	0	0		9.39742
Mfn2	7.199e-15	1.087e-13	9.2116	9.5945	9.4788	9.39	9.3029	0	0	0	0	0		9.39556
Tmsb15l	8.538e-13	4.373e-12	9.4925	9.5653	9.5799	9.4049	8.9251	0	0	0	0	0		9.39354
Ythdf3	3.538e-16	1.238e-14	9.2522	9.4369	9.4256	9.5078	9.3165	0	0	0	0	0		9.3878
Tsg101	1.908e-14	2.202e-13	9.6691	9.2269	9.321	9.3269	9.3776	0	0	0	0	0		9.3843
Eif5b	3.478e-16	1.225e-14	9.4617	9.3363	9.2524	9.321	9.4957	0	0	0	0	0		9.37342
Pitpnb	2.571e-18	5.663e-16	9.3385	9.4323	9.3161	9.343	9.4313	0	0	0	0	0		9.37224
Dctn5	7.603e-16	2.126e-14	9.5084	9.4415	9.2503	9.3759	9.2612	0	0	0	0	0		9.36746
Cpeb4	1.745e-11	4.918e-11	9.6007	9.6809	9.3498	9.5034	8.6966	0	0	0	0	0		9.36628
Aldh18a1	7.668e-13	4.012e-12	8.9588	9.6284	9.488	9.5068	9.2448	0	0	0	0	0		9.36536
Eif3c	1.639e-14	1.988e-13	9.079	9.4794	9.4242	9.4656	9.3672	0	0	0	0	0		9.36308
Sco1	8.564e-15	1.227e-13	9.3385	9.5563	9.4284	9.3494	9.1398	0	0	0	0	0		9.36248
Mtfr1l	2.095e-11	5.689e-11	9.4731	9.7447	9.2458	9.6151	8.719	0	0	0	0	0		9.35954
Ptp4a1	1.115e-14	1.474e-13	9.1295	9.372	9.5322	9.4666	9.2951	0	0	0	0	0		9.35908
Fam107a	1.235e-10	2.495e-10	9.5243	9.8606	9.3387	9.5417	8.522	0	0	0	0	0		9.35746
ND5	3.309e-10	5.87e-10	9.284	8.9087	9.284	8.9669	10.323	0	0	0	0	0		9.35332
Plxna2	9.45e-19	3.531e-16	9.3224	9.2916	9.3595	9.3735	9.4181	0	0	0	0	0		9.35302
Supt5h	2.837e-12	1.133e-11	9.4844	9.6145	9.2771	9.5473	8.8392	0	0	0	0	0		9.3525
Vps53	4.231e-15	7.624e-14	9.113	9.4574	9.4384	9.3882	9.3606	0	0	0	0	0		9.35152
Snrpc	2.765e-09	3.965e-09	10.015	8.6664	8.8927	8.8679	10.276	0	0	0	0	0		9.3436
Slc27a4	1.423e-14	1.795e-13	9.5399	9.1469	9.2647	9.2752	9.4707	0	0	0	0	0		9.33948
Thnsl1	9.68e-15	1.346e-13	9.0811	9.3774	9.3244	9.4246	9.4769	0	0	0	0	0		9.33688
Arfgap3	3.695e-12	1.4e-11	9.9031	9.1916	9.1546	9.1313	9.3017	0	0	0	0	0		9.33646
Gapvd1	2.118e-13	1.477e-12	9.029	9.5078	9.3001	9.2427	9.6021	0	0	0	0	0		9.33634
Exoc8	7.667e-13	4.012e-12	9.1702	9.5592	9.3637	9.606	8.9738	0	0	0	0	0		9.33458
Pik3r1	5.73e-13	3.208e-12	9.3841	9.5496	9.4151	9.4334	8.8903	0	0	0	0	0		9.3345
Rptor	9.147e-15	1.289e-13	9.0768	9.4481	9.3298	9.3443	9.4518	0	0	0	0	0		9.33016
Acot1	1.329e-15	3.163e-14	9.1841	9.4557	9.2221	9.3615	9.4174	0	0	0	0	0		9.32816
Aldh3a2	7.585e-13	3.981e-12	8.8848	9.3742	9.5322	9.5288	9.309	0	0	0	0	0		9.3258
Atp6v0c	3.909e-11	9.426e-11	9.1881	9.1135	9.0123	9.2221	10.088	0	0	0	0	0		9.3248
Slc24a2	3.651e-10	6.396e-10	9.6985	8.9736	9.0213	8.7846	10.146	0	0	0	0	0		9.3248
Hectd4	3.566e-16	1.24e-14	9.1702	9.4049	9.3106	9.4214	9.2842	0	0	0	0	0		9.31826
Exoc6b	1.239e-15	3.018e-14	9.2951	9.4619	9.2031	9.4166	9.2075	0	0	0	0	0		9.31684
Cherp	2.665e-17	2.134e-15	9.3115	9.3996	9.3809	9.2489	9.2396	0	0	0	0	0		9.3161
Evi5l	2.492e-13	1.672e-12	9.2987	9.5921	9.4233	9.296	8.9643	0	0	0	0	0		9.31488
Carm1	6.646e-13	3.595e-12	9.113	9.2503	9.2477	9.1712	9.763	0	0	0	0	0		9.30904
NOGENE	7.163e-17	4.115e-15	9.1901	9.3992	9.2628	9.3635	9.3231	0	0	0	0	0		9.30774
Serpina1d	2.371e-07	2.735e-07	11.362	11.483	11.789	11.733	11.307	3.263	0	2.7866	2.511	2.6323		9.29622
Gopc	6.616e-10	1.081e-09	9.0983	9.8553	9.4941	9.712	8.3161	0	0	0	0	0		9.29516
Chm	8.518e-15	1.227e-13	9.079	9.2339	9.3376	9.3183	9.4898	0	0	0	0	0		9.29172
Mrps35	2.395e-14	2.605e-13	9.4925	9.3487	9.255	9.3222	9.024	0	0	0	0	0		9.28848
Mtch1	4.317e-11	1.026e-10	9.5461	8.853	9.0334	9.0639	9.9168	0	0	0	0	0		9.28264
Copg1	3.601e-16	1.244e-14	9.2579	9.372	9.1171	9.2873	9.3538	0	0	0	0	0		9.27762
Olfm2	1.053e-15	2.675e-14	9.4584	9.2877	9.1523	9.2642	9.2073	0	0	0	0	0		9.27398
Gatad2b	2.073e-11	5.645e-11	9.3421	9.618	9.2597	9.5355	8.6073	0	0	0	0	0		9.27252
Nav1	6.306e-14	5.94e-13	9.3998	9.3833	9.2971	9.3381	8.9325	0	0	0	0	0		9.27016
Ogfr	1.295e-09	1.976e-09	9.9007	8.7512	8.8542	8.7462	10.095	0	0	0	0	0		9.26946
Sik3	5.326e-13	3.04e-12	9.0466	9.1515	9.1918	9.2267	9.6966	0	0	0	0	0		9.26264
Apba1	5.302e-14	5.094e-13	9.3737	9.4467	9.0715	9.3456	9.0326	0	0	0	0	0		9.25402
Exoc3	6.17e-16	1.863e-14	9.0618	9.3325	9.2766	9.2951	9.2919	0	0	0	0	0		9.25158
Traf3	1.094e-12	5.325e-12	9.079	9.3181	9.4049	9.5482	8.8552	0	0	0	0	0		9.24108
Arhgef12	4.887e-16	1.537e-14	9.271	9.3407	9.1782	9.3222	9.0912	0	0	0	0	0		9.24066
Dnajb11	2.059e-07	2.386e-07	10.617	10.685	10.591	10.737	10.328	0	0	2.5361	1.848	2.3785		9.23908
Bcr	3.215e-13	2.047e-12	9.1419	9.1469	9.1584	9.0872	9.6573	0	0	0	0	0		9.23834
Trove2	5.704e-13	3.2e-12	8.7863	9.3531	9.3633	9.3092	9.3744	0	0	0	0	0		9.23726
Cc2d1a	5.39e-10	9.012e-10	9.2425	9.6525	9.4631	9.5982	8.2007	0	0	0	0	0		9.2314
Mrpl1	9.374e-13	4.697e-12	9.2951	9.4862	9.2206	9.3722	8.7827	0	0	0	0	0		9.23136
Rps15	2.026e-16	8.635e-15	9.2914	9.3192	9.1413	9.2731	9.1127	0	0	0	0	0		9.22754
Aplp2	2.325e-12	9.712e-12	9.5415	9.3815	9.1579	9.3058	8.7472	0	0	0	0	0		9.22678
Arpc1b	2.349e-13	1.599e-12	9.231	9.4705	9.2472	9.3249	8.8586	0	0	0	0	0		9.22644
Eif3l	4.793e-15	8.305e-14	9.196	9.1515	9.138	9.1727	9.4717	0	0	0	0	0		9.22598
Efnb2	8.947e-14	7.689e-13	8.8848	9.3163	9.39	9.321	9.2031	0	0	0	0	0		9.22304
Tra2b	1.906e-10	3.638e-10	10.114	9.2095	8.8626	9.1017	8.824	0	0	0	0	0		9.22236
Ctps1	1.414e-13	1.076e-12	9.2406	9.4157	9.2389	9.3354	8.8623	0	0	0	0	0		9.21858
Mtmr9	4.201e-14	4.198e-13	9.0179	9.0824	9.3185	9.1604	9.4658	0	0	0	0	0		9.209
Tbcc	1.09e-14	1.455e-13	9.3097	9.3151	9.1992	9.274	8.9463	0	0	0	0	0		9.20886
Gns	2.602e-12	1.06e-11	9.0157	9.4913	9.2882	9.4527	8.7731	0	0	0	0	0		9.2042
Rpl37a	6.765e-12	2.301e-11	9.7797	9.1401	9.1814	8.9443	8.9408	0	0	0	0	0		9.19726
Ryden	4.739e-18	7.826e-16	9.2654	9.1401	9.2415	9.1609	9.1462	0	0	0	0	0		9.19082
Jakmip1	1.146e-11	3.489e-11	9.3349	9.4878	9.275	9.301	8.5504	0	0	0	0	0		9.18982
Dek	4.141e-13	2.487e-12	9.5415	9.2444	9.1413	9.1416	8.8688	0	0	0	0	0		9.18752
Zbtb8os	1.017e-10	2.103e-10	10.018	9.0243	9.1441	8.9632	8.7853	0	0	0	0	0		9.18698
Mbnl2	7.202e-13	3.818e-12	9.3562	9.3837	9.1624	9.2708	8.7465	0	0	0	0	0		9.18392
Fam171b	3.003e-14	3.157e-13	8.9018	9.3047	9.321	9.2543	9.1249	0	0	0	0	0		9.18134
Lrrc73	7.263e-13	3.838e-12	9.4617	9.3047	9.2068	9.1594	8.7639	0	0	0	0	0		9.1793
Tanc2	1.048e-17	1.147e-15	9.2766	9.1401	9.1657	9.1046	9.1809	0	0	0	0	0		9.17358
Lysmd2	2.382e-10	4.403e-10	9.614	9.5078	9.1982	9.274	8.2616	0	0	0	0	0		9.17112
Sap18	1.917e-11	5.287e-11	9.6944	9.1378	9.1324	9.2845	8.6047	0	0	0	0	0		9.17076
Ptrhd1	5.157e-15	8.792e-14	9.0682	9.2955	9.1906	9.3058	8.9884	0	0	0	0	0		9.1697
Faim2	7.163e-10	1.161e-09	9.7041	8.8103	8.8211	8.5557	9.944	0	0	0	0	0		9.16704
Ppm1g	1.865e-13	1.327e-12	8.8199	9.2422	9.388	9.2691	9.0928	0	0	0	0	0		9.1624
Dis3l2	3.002e-18	6.11e-16	9.1662	9.2286	9.1205	9.0888	9.1866	0	0	0	0	0		9.15814
Rbm39	7.308e-16	2.088e-14	9.3385	9.1631	9.1267	9.0537	9.1012	0	0	0	0	0		9.15664
Strip1	4.028e-17	2.729e-15	9.2233	9.1344	9.0395	9.1546	9.223	0	0	0	0	0		9.15496
P33monox	1.203e-11	3.638e-11	9.198	9.3565	9.358	9.3536	8.5086	0	0	0	0	0		9.15494
Smc3	7.684e-12	2.53e-11	9.115	9.4527	9.2031	9.4	8.5801	0	0	0	0	0		9.15018
Mrpl53	2.425e-08	3.027e-08	10.66	9.3296	9.0262	8.5943	8.1349	0	0	0	0	0		9.149
Eef1e1	2.53e-13	1.693e-12	9.326	9.2451	9.065	9.3188	8.7899	0	0	0	0	0		9.14896
Ahnak	1.257e-13	9.962e-13	9.4973	9.1244	8.9443	9.0699	9.1004	0	0	0	0	0		9.14726
Gcsh	1.014e-14	1.385e-13	9.192	9.2745	9.1277	9.2391	8.8927	0	0	0	0	0		9.1452
Nomo1	1.176e-15	2.905e-14	9.3188	9.1515	9.1143	9.1324	8.996	0	0	0	0	0		9.1426
Rpl38	7.619e-10	1.228e-09	11.994	12.153	11.818	11.842	11.306	3.1859	3.3219	2.2016	2.2928	2.406		9.14096
Gzmg	1.699e-08	2.16e-08	10.282	9.3558	9.0073	9.3058	7.7442	0	0	0	0	0		9.13902
Arl8a	1.632e-09	2.447e-09	9.3042	8.5865	8.9796	8.5721	10.22	0	0	0	0	0		9.13248
Luc7l2	2.788e-16	1.076e-14	9.1722	9.2281	9.0537	9.1874	9.0006	0	0	0	0	0		9.1284
Ncoa7	6.179e-14	5.842e-13	9.0531	9.2538	9.218	9.2829	8.8278	0	0	0	0	0		9.12712
Pdk1	2.199e-13	1.519e-12	9.0531	9.3345	9.2432	9.2121	8.7692	0	0	0	0	0		9.12242
Larp1	2.558e-13	1.707e-12	9.1088	9.0359	8.8605	9.0906	9.4794	0	0	0	0	0		9.11504
Acsl5	1.64e-14	1.988e-13	9.1682	9.2842	9.1075	9.1518	8.8505	0	0	0	0	0		9.11244
Gtf2f2	1.298e-11	3.874e-11	9.3947	9.3558	9.1163	9.2065	8.4814	0	0	0	0	0		9.11094
Gyg	1.489e-11	4.325e-11	9.3042	9.3538	9.1616	9.2819	8.45	0	0	0	0	0		9.1103
Ocrl	1.933e-15	4.154e-14	8.9588	9.0539	9.1485	9.0983	9.2905	0	0	0	0	0		9.11
Prmt8	6.533e-12	2.241e-11	9.115	8.8969	8.9568	8.8814	9.6917	0	0	0	0	0		9.10836
Abhd6	8.725e-13	4.46e-12	8.9977	9.0008	8.9111	9.0572	9.5689	0	0	0	0	0		9.10714
Amigo1	6.491e-16	1.927e-14	9.2766	9.1117	9.0129	9.0176	9.0938	0	0	0	0	0		9.10252
Hebp1	2.77e-15	5.422e-14	9.1722	8.9884	9.2534	9.1439	8.9495	0	0	0	0	0		9.10148
Actl6b	5.402e-15	8.958e-14	9.1192	9.3086	9.0079	9.1122	8.9416	0	0	0	0	0		9.0979
Tomm40l	1.812e-15	3.946e-14	8.9955	9.0707	9.0901	9.0265	9.3045	0	0	0	0	0		9.09746
Scn1b	3.807e-14	3.884e-13	8.781	9.2102	9.1573	9.1556	9.1789	0	0	0	0	0		9.0966
Eif3b	6.808e-14	6.291e-13	9.0983	9.2619	9.2082	9.1017	8.7702	0	0	0	0	0		9.08806
Coa3	5.078e-12	1.818e-11	9.1213	9.4132	8.9801	9.3273	8.5846	0	0	0	0	0		9.0853
Lcmt1	5.744e-13	3.211e-12	9.0157	8.8924	9.0073	8.9753	9.5192	0	0	0	0	0		9.08198
Mug1	1.915e-18	5.583e-16	9.0466	9.1109	9.0067	9.1127	9.1252	0	0	0	0	0		9.08042
Cdk17	2.376e-14	2.594e-13	9.2747	9.0276	9.1918	9.0469	8.8398	0	0	0	0	0		9.07616
Ssrp1	9.254e-17	4.94e-15	8.9565	9.1046	9.1352	9.0196	9.1548	0	0	0	0	0		9.07414
Acss2	2.15e-15	4.491e-14	9.0466	9.1631	9.0165	9.2226	8.909	0	0	0	0	0		9.07156
Cdh11	1.15e-11	3.492e-11	9.1337	9.3865	9.1814	9.2029	8.445	0	0	0	0	0		9.0699
Prpf40a	1.471e-17	1.408e-15	8.9681	9.0792	9.0946	9.1487	9.0528	0	0	0	0	0		9.06868
Tbce	7.244e-14	6.611e-13	9.1213	9.2119	9.0779	9.1841	8.7357	0	0	0	0	0		9.06618
Flii	3.377e-16	1.217e-14	9.1722	9.0447	8.9784	8.9698	9.1652	0	0	0	0	0		9.06606
Tnpo2	2.45e-13	1.652e-12	8.7276	8.9946	9.1712	9.1101	9.3258	0	0	0	0	0		9.06586
Katnal1	2.909e-11	7.467e-11	9.0983	9.4107	9.0685	9.3481	8.3863	0	0	0	0	0		9.06238
Agl	3.896e-17	2.674e-15	9.0811	9.1792	8.9813	9.0447	9.0224	0	0	0	0	0		9.06174
Pdpr	1.492e-17	1.408e-15	8.9704	9.1083	9.0282	9.139	9.0542	0	0	0	0	0		9.06002
Fxn	1.148e-11	3.49e-11	9.1357	9.4138	9.0436	9.2372	8.4594	0	0	0	0	0		9.05794
Wdr5	3.41e-11	8.457e-11	9.2425	9.2595	9.1864	9.2731	8.3165	0	0	0	0	0		9.0556
Vps18	9.609e-19	3.531e-16	9.0877	9.1051	8.9927	9.0469	9.0168	0	0	0	0	0		9.04984
Uchl5	1.338e-12	6.248e-12	8.9887	9.3498	9.0287	9.2453	8.6344	0	0	0	0	0		9.04938
Slc30a1	4.293e-11	1.021e-10	9.0877	8.734	8.8467	8.7964	9.771	0	0	0	0	0		9.04716
Tsc1	2.301e-11	6.154e-11	9.7328	8.9006	8.9626	8.7289	8.9018	0	0	0	0	0		9.04534
Uba6	4.695e-17	3.026e-15	8.9955	9.1122	9.0537	8.9331	9.108	0	0	0	0	0		9.0405
Fam131b	5.526e-14	5.29e-13	9.0045	9.2717	9.0118	9.127	8.7685	0	0	0	0	0		9.0367
Ccar1	1.284e-14	1.667e-13	9.2932	8.987	8.8765	9.0185	9.0081	0	0	0	0	0		9.03666
Pgam5	3.384e-12	1.303e-11	9.0898	9.2842	9.0531	9.2403	8.5098	0	0	0	0	0		9.03544
Kit	5.922e-16	1.799e-14	9.1601	9.0312	9.0755	9.0381	8.8716	0	0	0	0	0		9.0353
Arl15	1.524e-14	1.882e-13	8.9141	9.2764	9.0171	9.0821	8.8808	0	0	0	0	0		9.0341
Psme3	1.376e-16	6.609e-15	9.1662	9.0752	8.9813	8.9779	8.9597	0	0	0	0	0		9.03206
Slc1a4	1.246e-09	1.907e-09	9.4269	8.6959	8.4615	8.5872	9.9781	0	0	0	0	0		9.02992
Creb1	2.465e-15	4.992e-14	9.0661	8.9293	9.1254	9.1503	8.8633	0	0	0	0	0		9.02688
Ankfy1	2.281e-16	9.293e-15	8.991	8.9878	9.1075	8.906	9.1306	0	0	0	0	0		9.02458
Rrp7a	1.471e-11	4.288e-11	9.2914	8.6021	9.2148	8.6424	9.3722	0	0	0	0	0		9.02458
Ociad1	3.368e-11	8.373e-11	9.2329	8.8173	8.8151	8.6107	9.6399	0	0	0	0	0		9.02318
Ublcp1	1.271e-13	9.998e-13	9.0356	9.1644	9.1254	9.1239	8.666	0	0	0	0	0		9.02306
Gdap1l1	1.284e-12	6.04e-12	9.46	8.951	8.732	8.8939	9.0717	0	0	0	0	0		9.02172
Gnpda2	1.648e-15	3.691e-14	9.0725	9.0928	9.0545	9.0755	8.8093	0	0	0	0	0		9.02092
Arpin	2.302e-16	9.293e-15	9.1581	9.0084	8.9352	8.9387	9.061	0	0	0	0	0		9.02028
Adap1	3.225e-10	5.753e-10	11.905	12	11.93	11.95	11.924	2.1043	2.9449	3.3219	2.7442	3.4983		9.01908
Rab9	3.892e-13	2.381e-12	8.7967	9.2114	9.1244	9.2271	8.7337	0	0	0	0	0		9.01866
Chmp1b2	4.138e-11	9.9e-11	9.7082	9.0073	8.8455	8.9681	8.5634	0	0	0	0	0		9.0185
Eif3k	9.471e-13	4.735e-12	8.6632	9.2543	9.0556	9.2677	8.8389	0	0	0	0	0		9.01594
Oxsr1	5.904e-18	9.175e-16	9	9.0599	9.0566	9.0011	8.915	0	0	0	0	0		9.00652
Mtx3	3.742e-16	1.276e-14	8.8626	9.1051	8.9513	9.0318	9.0765	0	0	0	0	0		9.00546
Glyr1	5.619e-11	1.274e-10	8.9449	9.3608	9.1004	9.3054	8.2705	0	0	0	0	0		8.9964
Pick1	3.068e-13	1.97e-12	8.9093	8.8918	8.9346	8.8442	9.4	0	0	0	0	0		8.99598
Acbd6	6.858e-12	2.325e-11	8.8651	9.339	9.0773	9.2097	8.4798	0	0	0	0	0		8.99418
Gldc	4.12e-14	4.132e-13	8.7758	9.0364	9.1644	9.1439	8.8357	0	0	0	0	0		8.99124
Mrpl58	1.053e-14	1.42e-13	8.9796	9.1447	9.097	8.9736	8.7579	0	0	0	0	0		8.99056
Apc	2.044e-12	8.808e-12	9.2747	9.0856	9.0213	9.0669	8.5026	0	0	0	0	0		8.99022
Nudt16	5.987e-11	1.343e-10	8.7784	9.3698	9.1606	9.3206	8.3174	0	0	0	0	0		8.98936
Daam1	2.844e-15	5.508e-14	9.1821	9.0201	8.8542	8.8997	8.983	0	0	0	0	0		8.98782
Csnk1g3	6.236e-14	5.885e-13	8.9819	8.9021	8.8753	8.8269	9.2944	0	0	0	0	0		8.97612
Sdk2	1.39e-13	1.066e-12	8.8427	9.2257	8.9932	9.1072	8.7067	0	0	0	0	0		8.9751
Slc2a3	6.464e-10	1.058e-09	9.1841	8.614	8.6554	8.4939	9.9264	0	0	0	0	0		8.97476
Tpp2	2.92e-11	7.488e-11	11.726	11.622	11.648	11.567	12.093	2.8679	3.263	2.511	2.3785	2.7655		8.97402
Mrps31	3.758e-15	6.986e-14	9.0444	8.9212	9.149	8.909	8.8112	0	0	0	0	0		8.96696
Acsl4	1.859e-12	8.168e-12	9.15	8.8842	8.6724	8.7432	9.3512	0	0	0	0	0		8.9602
Plch2	2.123e-14	2.382e-13	8.9612	8.8623	8.8645	8.8673	9.2406	0	0	0	0	0		8.95918
Rabgap1l	9.685e-13	4.824e-12	8.7519	9.1812	9.093	9.1518	8.601	0	0	0	0	0		8.95578
Trappc3	1.564e-15	3.533e-14	9.0661	9.0447	8.7866	8.886	8.9955	0	0	0	0	0		8.95578
Tmco1	1.631e-09	2.446e-09	10.028	8.6014	8.5573	8.4141	9.1767	0	0	0	0	0		8.9555
Plbd2	1.304e-17	1.276e-15	8.9402	8.9313	9.0268	8.9977	8.8602	0	0	0	0	0		8.95124
Rpap3	3.88e-11	9.366e-11	8.9932	9.3483	8.9944	9.1609	8.2527	0	0	0	0	0		8.9499
Vps16	5.527e-15	9.072e-14	8.8676	8.9681	8.8288	8.8848	9.1724	0	0	0	0	0		8.94434
Dr1	4.365e-15	7.692e-14	8.9378	9.0922	9.0109	8.9399	8.733	0	0	0	0	0		8.94276
NOGENE	4.791e-16	1.516e-14	8.9704	8.9539	8.8461	9.0912	8.8499	0	0	0	0	0		8.9423
Snx30	6.533e-13	3.552e-12	8.8725	9.2138	8.9853	9.068	8.5519	0	0	0	0	0		8.9383
Fbl	1.302e-12	6.107e-12	8.7758	9.0949	9.0298	9.2245	8.5457	0	0	0	0	0		8.93414
Rgs17	3.504e-12	1.341e-11	8.8477	9.1677	9.0749	9.1434	8.4317	0	0	0	0	0		8.93308
Sugp2	1.981e-15	4.221e-14	8.975	9.0949	8.8323	8.941	8.7908	0	0	0	0	0		8.9268
Hnrnpul1	1.136e-11	3.467e-11	9.5399	8.706	8.7425	8.7074	8.9355	0	0	0	0	0		8.92626
Abcf2	9.579e-17	4.963e-15	8.8994	8.9524	8.8262	8.8814	9.0444	0	0	0	0	0		8.92076
Ssr1	3.325e-13	2.097e-12	9.1213	8.6286	8.7967	8.8467	9.1712	0	0	0	0	0		8.9129
Nufip2	3.846e-14	3.911e-13	9.2019	8.9108	8.7781	8.8988	8.7725	0	0	0	0	0		8.91242
Zmpste24	4.469e-18	7.725e-16	8.825	8.9192	8.9524	8.9643	8.8869	0	0	0	0	0		8.90956
Pfas	2.564e-16	1.01e-14	8.9704	9.0229	8.8262	8.8038	8.9114	0	0	0	0	0		8.90694
Gfm1	8.377e-14	7.33e-13	8.9519	9.0438	8.9975	8.9638	8.5672	0	0	0	0	0		8.90484
Mlf2	7.473e-12	2.478e-11	9.2635	9.1244	8.7787	8.9609	8.3966	0	0	0	0	0		8.90482
Taok2	1.011e-13	8.387e-13	8.9635	9.0843	8.9707	8.9162	8.5664	0	0	0	0	0		8.90022
Wdfy3	3.055e-16	1.137e-14	8.7784	8.9487	9.0226	8.837	8.9039	0	0	0	0	0		8.89812
Pakap	8.051e-15	1.182e-13	8.8452	9.0079	8.9969	8.9692	8.6692	0	0	0	0	0		8.89768
Rabif	1.663e-11	4.736e-11	9.0356	9.2197	8.7715	9.1477	8.3038	0	0	0	0	0		8.89566
Gabrb2	2.441e-12	1.011e-11	9.0378	8.7629	8.5846	8.7502	9.3276	0	0	0	0	0		8.89262
Serpinh1	1.961e-13	1.38e-12	8.9117	9.0312	8.9568	9.0301	8.5192	0	0	0	0	0		8.8898
Snx15	3.878e-17	2.674e-15	8.8452	9.014	8.8826	8.8514	8.8379	0	0	0	0	0		8.88622
Ccdc92	1.266e-14	1.648e-13	9.0422	8.9658	8.8351	8.9248	8.6478	0	0	0	0	0		8.88314
Rasal2	2.289e-14	2.536e-13	8.9635	8.9941	8.6363	8.7964	9.0207	0	0	0	0	0		8.8822
Arhgef11	2.304e-12	9.647e-12	9.1439	9.0999	8.8787	8.8673	8.4128	0	0	0	0	0		8.88052
Slc30a9	6.353e-14	5.963e-13	8.6344	9.0373	8.8351	8.8032	9.0896	0	0	0	0	0		8.87992
Hip1	1.042e-15	2.659e-14	8.8701	9.0031	8.9099	8.9072	8.7008	0	0	0	0	0		8.87822
Akr1b10	1.648e-11	4.703e-11	9.1802	9.0479	9.0025	8.9224	8.2355	0	0	0	0	0		8.8777
Coq6	3.702e-12	1.402e-11	8.9402	9.0843	8.9932	9.0296	8.334	0	0	0	0	0		8.87626
Sra1	3.723e-13	2.298e-12	9.0747	9.058	8.7572	8.9522	8.529	0	0	0	0	0		8.87422
Nop56	2.279e-14	2.53e-13	8.7384	8.9102	8.7357	8.8408	9.1306	0	0	0	0	0		8.87114
Pik3r4	2.199e-16	9.152e-15	9.0135	8.8022	8.7823	8.8842	8.8664	0	0	0	0	0		8.86972
Rbm33	2.218e-10	4.143e-10	8.7194	9.4292	8.5977	9.3556	8.2307	0	0	0	0	0		8.86652
Pdlim1	3.375e-13	2.123e-12	9.0312	9.0909	8.614	8.9539	8.625	0	0	0	0	0		8.863
Tenm2	1.201e-15	2.939e-14	8.7276	9.0326	8.8679	8.879	8.807	0	0	0	0	0		8.86282
Asl	9.318e-18	1.048e-15	8.7837	8.9495	8.8398	8.8483	8.8848	0	0	0	0	0		8.86122
Vmn2r3	2.381e-08	2.976e-08	8.3945	9.8935	8.7306	9.6411	7.6308	0	0	0	0	0		8.8581
Kcna1	5.873e-16	1.794e-14	8.6858	8.9072	8.8449	8.906	8.946	0	0	0	0	0		8.85798
Eny2	1.35e-10	2.704e-10	8.9117	9.1799	9.055	9.1101	8.0101	0	0	0	0	0		8.85336
Znf512	3.263e-21	8.45e-18	8.8199	8.8281	8.8753	8.8496	8.8564	0	0	0	0	0		8.84586
Ppm1b	1.802e-13	1.29e-12	8.807	9.0819	8.733	9.0238	8.5725	0	0	0	0	0		8.84364
Fnbp1l	9.807e-13	4.876e-12	9.2822	8.7781	8.7438	8.6007	8.7837	0	0	0	0	0		8.8377
Cstf2	3.482e-11	8.599e-11	9.0962	9.1916	8.6997	9.0037	8.1903	0	0	0	0	0		8.8363
Rpl8	8.792e-13	4.468e-12	12.285	11.974	11.816	11.768	11.853	3.0179	3.1538	3.1043	2.926	3.3219		8.83442
Rimbp2	1.672e-11	4.75e-11	9.0201	9.0798	8.8701	9.0101	8.1864	0	0	0	0	0		8.8333
Cds1	2.217e-16	9.152e-15	8.7465	8.9695	8.8135	8.7622	8.8701	0	0	0	0	0		8.83236
Tsr2	1.008e-07	1.194e-07	10.745	8.1639	8.2531	8.1467	8.8373	0	0	0	0	0		8.8292
Gc	1.526e-12	6.983e-12	8.6546	8.9884	8.9912	9.0731	8.4313	0	0	0	0	0		8.82772
C530008M17Rik	1.543e-11	4.457e-11	8.9932	9.0196	8.8894	9.0375	8.1774	0	0	0	0	0		8.82342
Apbb1	7.419e-11	1.612e-10	8.9519	9.1331	8.8933	9.0795	8.0428	0	0	0	0	0		8.82012
Prkag2	8.729e-14	7.562e-13	9.0983	8.7323	8.6195	8.7218	8.9263	0	0	0	0	0		8.81964
Ca1	1.307e-11	3.9e-11	8.9402	9.0739	8.9144	8.9718	8.1864	0	0	0	0	0		8.81734
Ipcef1	2.537e-18	5.663e-16	8.8602	8.8281	8.8408	8.7276	8.7964	0	0	0	0	0		8.81062
Iqsec3	1.049e-13	8.607e-13	8.6315	9.0626	8.8474	8.909	8.5958	0	0	0	0	0		8.80926
Tagln	7.565e-15	1.129e-13	8.6858	8.8903	8.7187	9.0137	8.7238	0	0	0	0	0		8.80646
Prcc	2.176e-11	5.883e-11	8.7915	9.1737	8.9012	8.9924	8.1724	0	0	0	0	0		8.80624
Ildr2	7.323e-17	4.162e-15	8.7705	8.7735	8.7142	8.8489	8.9162	0	0	0	0	0		8.80466
Sema4d	5.629e-13	3.172e-12	9.192	8.7529	8.7211	8.5357	8.8199	0	0	0	0	0		8.80432
Hsd17b11	1.754e-13	1.267e-12	8.7705	8.7912	8.6847	8.5999	9.1452	0	0	0	0	0		8.7983
Lrp1b	1.106e-15	2.772e-14	8.8577	8.7781	8.7738	8.6417	8.939	0	0	0	0	0		8.79806
Gpm6b	3.412e-08	4.195e-08	9.231	7.9819	8.5634	7.9617	10.244	0	0	0	0	0		8.7964
Dhx30	1.169e-16	5.827e-15	8.7056	8.8237	8.8894	8.8508	8.7118	0	0	0	0	0		8.79626
Atp9a	1.044e-12	5.114e-12	8.7519	9.1012	8.7249	8.9626	8.4183	0	0	0	0	0		8.79178
Prkg2	1.284e-12	6.04e-12	8.4814	8.9878	8.9428	9.0249	8.5216	0	0	0	0	0		8.7917
Grm1	1.232e-14	1.607e-13	8.5902	8.8367	8.718	8.8202	8.9921	0	0	0	0	0		8.79144
Tmed7	4.034e-16	1.346e-14	8.6489	8.8109	8.8542	8.7384	8.8936	0	0	0	0	0		8.7892
Gm20671	3.085e-16	1.14e-14	8.8651	8.8598	8.7549	8.6402	8.825	0	0	0	0	0		8.789
Bmpr2	4.648e-14	4.574e-13	8.6546	8.9021	8.9881	8.8329	8.5619	0	0	0	0	0		8.78792
Atp5j2	5.363e-15	8.941e-14	9.0179	8.7204	8.6816	8.7283	8.7882	0	0	0	0	0		8.78728
Pitpnm2	6.429e-14	6.003e-13	8.7001	9.0672	8.6044	8.8691	8.6956	0	0	0	0	0		8.78728
Pak6	1.238e-17	1.24e-15	8.7572	8.8945	8.7448	8.7495	8.7728	0	0	0	0	0		8.78376
Slc7a14	1.84e-11	5.123e-11	8.4216	8.6596	8.6449	8.784	9.4066	0	0	0	0	0		8.78334
Slc23a2	4.099e-13	2.467e-12	8.5102	8.7602	8.9684	8.6099	9.0556	0	0	0	0	0		8.78086
Serpine2	7.882e-14	6.954e-13	8.8994	8.9036	8.618	8.9372	8.5333	0	0	0	0	0		8.7783
Psmd8	1.49e-11	4.325e-11	9.3807	8.8054	8.6607	8.6084	8.4342	0	0	0	0	0		8.77788
Mtfp1	9.918e-10	1.561e-09	8.3945	9.3147	8.9443	9.3192	7.9123	0	0	0	0	0		8.777
Cxadr	1.785e-13	1.283e-12	8.683	8.9539	8.8517	8.9355	8.457	0	0	0	0	0		8.77622
Nsg1	2.455e-14	2.665e-13	8.5477	8.9057	8.9117	8.8508	8.6643	0	0	0	0	0		8.77604
Map9	6.793e-15	1.041e-13	8.8725	8.9652	8.6784	8.7231	8.6381	0	0	0	0	0		8.77546
Inpp5j	5.192e-12	1.851e-11	8.9236	8.9946	8.6536	9.0218	8.2687	0	0	0	0	0		8.77246
Tgfbr2	2.143e-13	1.486e-12	8.8427	8.7529	8.637	8.5306	9.0869	0	0	0	0	0		8.77002
Acp6	7.446e-14	6.727e-13	8.4684	8.8376	8.7388	8.9658	8.8345	0	0	0	0	0		8.76902
Sorcs2	3.008e-17	2.338e-15	8.8326	8.8189	8.6561	8.7797	8.7512	0	0	0	0	0		8.7677
Nasp	3.162e-14	3.296e-13	8.9212	8.8125	8.783	8.8335	8.4814	0	0	0	0	0		8.76632
Rundc3a	1.115e-14	1.474e-13	8.9449	8.8477	8.6575	8.5774	8.7859	0	0	0	0	0		8.76268
Rps6ka1	8.451e-13	4.346e-12	8.9519	8.9352	8.7129	8.8489	8.3394	0	0	0	0	0		8.75766
Nyap2	4.359e-11	1.033e-10	9.1233	8.9481	8.7549	8.8988	8.0553	0	0	0	0	0		8.75608
Abcf1	4.974e-12	1.788e-11	9.1398	8.5755	8.5294	8.4794	9.0539	0	0	0	0	0		8.7556
Plxnd1	9.741e-14	8.172e-13	8.4652	8.8119	8.9215	8.9084	8.6568	0	0	0	0	0		8.75276
Gtpbp1	7.056e-13	3.767e-12	8.7139	9.0869	8.6931	8.8561	8.4128	0	0	0	0	0		8.75256
Tmpo	8.852e-13	4.485e-12	8.9727	8.6561	8.4959	8.563	9.0647	0	0	0	0	0		8.75048
Rras2	5.488e-17	3.296e-15	8.7139	8.8682	8.7665	8.7067	8.6767	0	0	0	0	0		8.7464
Cds2	5.891e-13	3.27e-12	8.7411	9.0304	8.5054	8.9416	8.5118	0	0	0	0	0		8.74606
Asap2	1.433e-16	6.824e-15	8.614	8.7856	8.7149	8.837	8.7718	0	0	0	0	0		8.74466
Arid1b	1.41e-14	1.783e-13	8.6575	8.9343	8.7902	8.7957	8.5376	0	0	0	0	0		8.74306
Pik3c3	1.607e-14	1.963e-13	8.9117	8.8243	8.614	8.7983	8.5446	0	0	0	0	0		8.73858
Usp19	6.909e-12	2.339e-11	9.1601	8.8909	8.6914	8.6614	8.2701	0	0	0	0	0		8.73478
Eml4	3.114e-17	2.385e-15	8.6402	8.8032	8.6724	8.7784	8.7546	0	0	0	0	0		8.72976
Ptbp1	1.788e-14	2.119e-13	8.8502	8.8189	8.7344	8.7255	8.457	0	0	0	0	0		8.7172
Upf2	2.744e-13	1.804e-12	8.8823	8.9272	8.6496	8.731	8.3794	0	0	0	0	0		8.7139
Rab21	7.38e-08	8.83e-08	9.1702	9.0922	9.1667	8.8969	9.5308	2.2928	0	0	0	0		8.7128
Sacm1l	1.878e-11	5.202e-11	8.4846	8.7448	8.4774	8.4998	9.3401	0	0	0	0	0		8.70934
Psmd10	2.337e-10	4.332e-10	9.3981	8.8297	8.5898	8.7411	7.9841	0	0	0	0	0		8.70856
Arhgap39	6.15e-13	3.382e-12	8.9212	8.9501	8.4986	8.7469	8.42	0	0	0	0	0		8.70736
Rab27b	1.428e-15	3.321e-14	8.5872	8.8093	8.7629	8.7889	8.5793	0	0	0	0	0		8.70552
Cacna1e	5.607e-07	6.334e-07	9.5615	9.8785	9.539	9.7084	9.5949	1.848	2.9069	0	0	0		8.70548
Hmgn5	2.825e-09	4.048e-09	9.5228	8.1085	8.2384	8.2512	9.3968	0	0	0	0	0		8.70354
Lmtk2	1.713e-11	4.838e-11	8.6257	9.2138	8.6938	8.7846	8.1928	0	0	0	0	0		8.70214
Chp1	4.62e-09	6.386e-09	8.4749	9.4132	8.9827	9.0996	7.5251	0	0	0	0	0		8.6991
Eml1	3.856e-16	1.303e-14	8.7889	8.8022	8.601	8.6114	8.6728	0	0	0	0	0		8.69526
Spcs2	4.935e-11	1.138e-10	8.4619	8.4068	8.7118	8.4838	9.4111	0	0	0	0	0		8.69508
Maged1	2.212e-12	9.374e-12	8.7029	8.8281	8.9105	8.8147	8.2046	0	0	0	0	0		8.69216
Plcb4	1.938e-12	8.429e-12	8.646	9.0392	8.7269	8.7679	8.2691	0	0	0	0	0		8.68982
Gucy1a1	1.712e-13	1.246e-12	8.56	8.7505	8.4607	8.6682	8.9972	0	0	0	0	0		8.68732
Rbm10	6.639e-13	3.595e-12	8.8199	8.9117	8.641	8.7645	8.2877	0	0	0	0	0		8.68496
Dgke	6.255e-13	3.437e-12	8.4717	8.6366	8.6421	8.5714	9.0967	0	0	0	0	0		8.6837
Eif2b3	3.905e-20	5.159e-17	8.6604	8.7347	8.6717	8.6675	8.6689	0	0	0	0	0		8.68064
Pon2	7.039e-12	2.375e-11	8.3633	9.0425	8.8045	8.8802	8.3088	0	0	0	0	0		8.67986
Rmdn1	2.646e-11	6.902e-11	8.7249	9.0757	8.7425	8.8173	8.0389	0	0	0	0	0		8.67986
Osbp2	7.744e-13	4.042e-12	8.3061	8.9764	8.7579	8.7462	8.5999	0	0	0	0	0		8.6773
Scyl1	1.32e-13	1.028e-12	8.7357	8.9123	8.6188	8.7391	8.3755	0	0	0	0	0		8.67628
Sdcbp	1.661e-08	2.115e-08	8.7546	9.192	9.1923	9.0639	7.1579	0	0	0	0	0		8.67214
Adgrl2	1.444e-10	2.858e-10	8.8477	9.0819	8.7381	8.799	7.8449	0	0	0	0	0		8.66232
Cbs	6.384e-13	3.482e-12	8.7221	8.893	8.5733	8.7784	8.2696	0	0	0	0	0		8.64728
Usp47	1.75e-11	4.925e-11	8.445	9.0215	8.7738	8.8679	8.1143	0	0	0	0	0		8.6445
Ankrd28	3.902e-13	2.381e-12	8.975	8.5407	8.6977	8.3602	8.621	0	0	0	0	0		8.63892
Ptgs2	8.841e-11	1.864e-10	8.3278	8.1724	8.8304	8.5607	9.2999	0	0	0	0	0		8.63824
Txndc12	1.742e-07	2.028e-07	9.8849	9.8857	9.7199	9.8452	9.6189	1.585	2.7004	0	0	1.4854		8.63676
Preb	1.624e-10	3.168e-10	9.3439	8.7398	8.5082	8.5542	8.0123	0	0	0	0	0		8.63168
Cobl	9.089e-11	1.908e-10	8.7889	8.9117	8.7448	8.8713	7.8411	0	0	0	0	0		8.63156
Mlec	3.599e-13	2.233e-12	8.7029	8.4635	8.5236	8.4749	8.9924	0	0	0	0	0		8.63146
Hspb1	6.95e-11	1.523e-10	8.781	8.9132	8.5584	8.9881	7.9159	0	0	0	0	0		8.63132
Gfod1	2.585e-12	1.055e-11	8.529	8.9773	8.5664	8.8288	8.2394	0	0	0	0	0		8.62818
Numa1	9.764e-16	2.542e-14	8.4878	8.7122	8.7549	8.5951	8.5891	0	0	0	0	0		8.62782
Mrrf	9.304e-15	1.308e-13	8.8602	8.6095	8.6213	8.4931	8.5419	0	0	0	0	0		8.6252
Ces1c	8.12e-15	1.189e-13	8.8552	8.5058	8.5831	8.6363	8.5345	0	0	0	0	0		8.62298
Csmd1	5.014e-14	4.853e-13	8.5196	8.7692	8.7187	8.7296	8.3602	0	0	0	0	0		8.61946
Shoc2	9.519e-19	3.531e-16	8.5992	8.5782	8.5748	8.6286	8.6833	0	0	0	0	0		8.61282
Stk4	9.183e-12	2.934e-11	8.6257	8.9117	8.6348	8.8269	8.0547	0	0	0	0	0		8.61076
Eps15	3.258e-11	8.13e-11	8.56	9.0017	8.574	8.9105	8.0045	0	0	0	0	0		8.61014
Lamb2	8.517e-13	4.37e-12	8.4317	8.8307	8.5473	8.9048	8.3358	0	0	0	0	0		8.61006
Dgkg	1.21e-10	2.456e-10	8.0768	8.4553	8.8093	8.4141	9.2935	0	0	0	0	0		8.6098
Bag1	3.575e-11	8.784e-11	8.3349	8.9744	8.8003	8.8802	8.0526	0	0	0	0	0		8.60848
Kcnab1	2.155e-07	2.495e-07	10.478	10.336	10.433	10.358	11.009	1.848	0	2.848	2.0704	2.8074		8.60804
Nudt18	2.467e-11	6.502e-11	9.0898	8.733	8.4994	8.6554	8.0509	0	0	0	0	0		8.6057
Ppat	3.92e-12	1.469e-11	8.5812	8.7569	8.7817	8.7908	8.0843	0	0	0	0	0		8.59898
Kifap3	8.156e-15	1.191e-13	8.3807	8.6795	8.5676	8.6202	8.7448	0	0	0	0	0		8.59856
Ssbp1	1.798e-13	1.29e-12	8.7303	8.6286	8.2612	8.5752	8.7827	0	0	0	0	0		8.5956
Lnpk	2.366e-15	4.81e-14	8.7492	8.6003	8.6355	8.5649	8.4216	0	0	0	0	0		8.5943
Scyl2	4.329e-15	7.692e-14	8.4549	8.7231	8.6862	8.6402	8.4566	0	0	0	0	0		8.5922
Zfr	6.717e-11	1.478e-10	11.033	11.273	11.318	11.32	10.997	2.6554	2.9069	2.1375	2.263	3.0531		8.58502
Bsdc1	4.159e-12	1.54e-11	8.6344	8.7791	8.7432	8.7132	8.0531	0	0	0	0	0		8.5846
Synpr	9.89e-15	1.361e-13	8.6228	8.6482	8.3305	8.6453	8.6657	0	0	0	0	0		8.5825
Fdx2	1.068e-12	5.211e-12	8.6431	8.7296	8.56	8.8154	8.1594	0	0	0	0	0		8.5815
Zc3h14	2.277e-10	4.235e-10	8.1844	9.1117	8.796	8.879	7.9331	0	0	0	0	0		8.58084
Cutc	6.06e-11	1.357e-10	8.5446	8.9773	8.7142	8.781	7.8765	0	0	0	0	0		8.57872
Fry	7.802e-14	6.896e-13	8.4483	8.5058	8.5337	8.4931	8.8994	0	0	0	0	0		8.57606
S100a6	8.16e-12	2.66e-11	8.7837	8.2432	8.3966	8.4077	9.0408	0	0	0	0	0		8.5744
Mfap1b	1.566e-12	7.123e-12	9.0422	8.4725	8.5286	8.4085	8.4136	0	0	0	0	0		8.57308
Stx6	1.392e-14	1.776e-13	8.3527	8.5596	8.6132	8.5446	8.7632	0	0	0	0	0		8.56666
Vps11	4.231e-16	1.389e-14	8.4975	8.6699	8.5082	8.671	8.4854	0	0	0	0	0		8.5664
Hars2	5.645e-12	1.983e-11	8.6051	8.8878	8.481	8.7685	8.0779	0	0	0	0	0		8.56406
Mesd	9.011e-12	2.891e-11	8.8969	8.0773	8.5789	8.4288	8.8361	0	0	0	0	0		8.5636
Creld1	1.814e-15	3.946e-14	8.6858	8.5634	8.4022	8.6485	8.4986	0	0	0	0	0		8.5597
Pdlim5	1.839e-12	8.115e-12	8.6717	8.5902	8.7136	8.7334	8.0821	0	0	0	0	0		8.5582
Luc7l3	1.834e-16	8.076e-15	8.7056	8.5511	8.5314	8.4947	8.5038	0	0	0	0	0		8.55732
Krt2	5.474e-06	5.983e-06	12.191	10.325	10.257	9.934	12.233	2.585	3.2016	3.5607	0	2.8074		8.55706
Itm2c	3.222e-13	2.049e-12	8.7652	8.5302	8.2673	8.4413	8.7794	0	0	0	0	0		8.55668
Fgg	1.215e-12	5.779e-12	8.9796	8.3349	8.6107	8.3957	8.4607	0	0	0	0	0		8.55632
Cnbp	6.12e-11	1.368e-10	8.4975	8.9687	8.55	8.8645	7.8918	0	0	0	0	0		8.5545
Serpini1	6.466e-11	1.432e-10	8.781	8.843	8.6213	8.7074	7.808	0	0	0	0	0		8.55214
Slc30a3	2.14e-11	5.801e-11	8.9955	8.4195	8.0843	8.4005	8.8505	0	0	0	0	0		8.55006
Trim32	1.186e-08	1.542e-08	8.7546	9.2029	8.9434	9.1319	8.2909	0	0	1.6323	0	0		8.53828
Grm2	1.813e-10	3.486e-10	8.5902	8.3287	8.1819	8.2211	9.347	0	0	0	0	0		8.53378
Prpsap2	8.986e-14	7.693e-13	8.6199	8.489	8.3138	8.4367	8.7996	0	0	0	0	0		8.5318
Ppp6c	6.858e-16	1.992e-14	8.5782	8.4814	8.3889	8.5423	8.6564	0	0	0	0	0		8.52944
Rasgrf1	1.788e-16	8.006e-15	8.614	8.4911	8.4102	8.5208	8.6084	0	0	0	0	0		8.5289
Becn1	8.888e-16	2.375e-14	8.4911	8.6384	8.5706	8.5744	8.3672	0	0	0	0	0		8.52834
Itm2b	4.977e-14	4.827e-13	8.3876	8.4672	8.4124	8.5615	8.8125	0	0	0	0	0		8.52824
Cmc2	1.033e-10	2.131e-10	8.8045	8.975	8.1819	8.7367	7.9242	0	0	0	0	0		8.52446
Kpna1	6.407e-13	3.491e-12	8.4975	8.5322	8.1893	8.5372	8.8586	0	0	0	0	0		8.52296
NOGENE	2.064e-14	2.324e-13	8.7112	8.4174	8.4898	8.3403	8.6421	0	0	0	0	0		8.52016
Cacna1b	2.124e-12	9.09e-12	8.6858	8.4745	8.255	8.2798	8.9021	0	0	0	0	0		8.51944
Atp13a1	1.687e-15	3.761e-14	8.3314	8.5801	8.5664	8.6154	8.5014	0	0	0	0	0		8.51894
Bag2	4.318e-11	1.026e-10	8.4652	8.7973	8.7036	8.784	7.8405	0	0	0	0	0		8.51812
Ntng1	3.519e-15	6.595e-14	8.4684	8.3966	8.5657	8.4413	8.707	0	0	0	0	0		8.5158
Taok2	1.374e-12	6.385e-12	8.611	8.7869	8.5236	8.5519	8.0827	0	0	0	0	0		8.51122
Fam3c	1.809e-12	8.039e-12	8.4549	8.223	8.6003	8.3518	8.9251	0	0	0	0	0		8.51102
Pcyox1l	6.605e-16	1.95e-14	8.6021	8.4124	8.5286	8.3957	8.6033	0	0	0	0	0		8.50842
Pdyn	2.086e-11	5.671e-11	8.5962	8.6095	8.5789	8.8477	7.8777	0	0	0	0	0		8.502
Fam210a	9.115e-15	1.289e-13	8.425	8.5129	8.3354	8.5038	8.7105	0	0	0	0	0		8.49752
Lsm4	3.218e-11	8.044e-11	8.7194	8.7512	8.3615	8.7764	7.8759	0	0	0	0	0		8.49688
Hint3	1.711e-15	3.766e-14	8.5782	8.5302	8.3174	8.4553	8.5921	0	0	0	0	0		8.49464
Cacna1a	7.086e-15	1.077e-13	8.3633	8.7153	8.4417	8.5149	8.4375	0	0	0	0	0		8.49454
Sdc3	4.052e-11	9.734e-11	8.2914	7.971	8.6685	8.4894	9.0285	0	0	0	0	0		8.48976
Guf1	1.037e-11	3.228e-11	8.6914	8.7652	8.4846	8.5808	7.9212	0	0	0	0	0		8.48864
Asns	6.004e-13	3.326e-12	8.2541	8.4296	8.5026	8.3729	8.8725	0	0	0	0	0		8.48634
Pmm2	1.777e-13	1.281e-12	8.3242	8.5283	8.4516	8.3147	8.8074	0	0	0	0	0		8.48524
Mrpl16	4e-12	1.488e-11	8.3562	8.7438	8.5767	8.718	8.0307	0	0	0	0	0		8.48508
Wbp11	1.559e-17	1.445e-15	8.5165	8.3733	8.5185	8.5114	8.5046	0	0	0	0	0		8.48486
NOGENE	3.492e-08	4.289e-08	9.7423	8.5793	8.5192	8.4475	7.1189	0	0	0	0	0		8.48144
AK157302	4.852e-11	1.123e-10	8.5228	8.8894	8.4524	8.7115	7.8208	0	0	0	0	0		8.47938
Csdc2	4.482e-10	7.69e-10	9.0378	8.6966	8.2817	8.7262	7.6482	0	0	0	0	0		8.4781
Slc16a1	1.097e-11	3.367e-11	8.5661	8.4561	8.0922	8.2877	8.9878	0	0	0	0	0		8.47798
Actr1b	2.279e-11	6.111e-11	12.243	12.368	12.584	12.395	12.631	4.121	3.6206	3.6323	4.3716	4.1127		8.47256
Sfr1	9.36e-11	1.958e-10	8.4047	8.6865	8.8135	8.7166	7.732	0	0	0	0	0		8.47066
Bin2	1.024e-11	3.194e-11	8.4516	8.707	8.5748	8.7122	7.9057	0	0	0	0	0		8.47026
Eif3d	1.112e-15	2.772e-14	8.3979	8.3698	8.545	8.4149	8.6165	0	0	0	0	0		8.46882
Dda1	5.263e-10	8.83e-10	8.5165	8.9372	8.7136	8.646	7.5298	0	0	0	0	0		8.46862
Zzef1	6.678e-15	1.031e-13	8.445	8.6221	8.5407	8.438	8.2668	0	0	0	0	0		8.46252
Cluh	2.056e-10	3.886e-10	9.3061	8.4111	8.2517	8.2148	8.1143	0	0	0	0	0		8.4596
Mon2	1.002e-18	3.531e-16	8.3979	8.4258	8.487	8.487	8.4975	0	0	0	0	0		8.45904
Shmt2	1.926e-12	8.384e-12	8.6489	8.3505	8.1298	8.3536	8.8119	0	0	0	0	0		8.45894
Plxnb2	3.319e-15	6.282e-14	8.5415	8.4911	8.3576	8.5943	8.3074	0	0	0	0	0		8.45838
Clptm1	5.058e-12	1.814e-11	8.0246	8.4692	8.4317	8.4458	8.8851	0	0	0	0	0		8.45128
Slc9a3r2	5.361e-11	1.223e-10	9.0553	8.5465	8.2153	8.4561	7.9612	0	0	0	0	0		8.44688
Nup214	5.179e-12	1.848e-11	8.6373	8.6489	8.5098	8.5196	7.9117	0	0	0	0	0		8.44546
Tmem11	1.259e-11	3.771e-11	8.3633	8.2896	8.3641	8.1584	9.0329	0	0	0	0	0		8.44166
Mpdz	1.505e-13	1.131e-12	8.3807	8.5913	8.5488	8.5592	8.1221	0	0	0	0	0		8.44042
Nup50	2.265e-11	6.082e-11	8.4975	8.6366	8.6521	8.6121	7.7905	0	0	0	0	0		8.43776
Nit1	2.284e-15	4.696e-14	8.4216	8.4951	8.5177	8.5114	8.2417	0	0	0	0	0		8.4375
Trmt112	6.926e-09	9.282e-09	8.6431	9.0312	8.4931	8.8777	7.1416	0	0	0	0	0		8.43734
Csnk1a1	4.111e-11	9.844e-11	8.4047	8.0196	8.4263	8.2522	9.0816	0	0	0	0	0		8.43688
Asah1	4.226e-12	1.557e-11	8.0682	8.409	8.403	8.372	8.8963	0	0	0	0	0		8.4297
Cpt1a	1.978e-15	4.221e-14	8.2351	8.5058	8.4615	8.5141	8.4237	0	0	0	0	0		8.42804
Pank4	9.682e-16	2.533e-14	8.3097	8.5322	8.5228	8.4405	8.3314	0	0	0	0	0		8.42732
Snf8	2.307e-15	4.708e-14	8.4911	8.4267	8.4409	8.5395	8.2351	0	0	0	0	0		8.42666
Vldlr	2.362e-10	4.369e-10	9.2729	8.3624	8.3029	8.1829	8.0118	0	0	0	0	0		8.42658
Gmpr2	9.601e-15	1.339e-13	8.3492	8.5588	8.4325	8.5542	8.2341	0	0	0	0	0		8.42576
Hdac5	1.417e-13	1.076e-12	8.5477	8.4765	8.4388	8.5736	8.0922	0	0	0	0	0		8.42576
Ubap2l	4.078e-10	7.057e-10	12.333	11.784	11.924	11.941	11.639	4.0268	2.9449	3.9069	3.406	3.2172		8.42384
Psmb2	8.974e-14	7.693e-13	8.3314	8.4672	8.2489	8.3478	8.7197	0	0	0	0	0		8.423
Atf2	3.446e-12	1.325e-11	8.3206	8.6543	8.6003	8.5736	7.9577	0	0	0	0	0		8.4213
Mrpl39	5.982e-14	5.693e-13	8.317	8.5588	8.5865	8.457	8.1704	0	0	0	0	0		8.41794
Cpne9	3.265e-11	8.143e-11	8.4081	8.9042	8.4388	8.503	7.8323	0	0	0	0	0		8.41728
Abhd12	2.836e-10	5.118e-10	8.5932	8.0307	8.097	8.137	9.2226	0	0	0	0	0		8.4161
Cmbl	2.669e-13	1.768e-12	8.4183	8.4725	8.5357	8.5872	8.0564	0	0	0	0	0		8.41402
Dip2c	6.834e-18	9.762e-16	8.4717	8.4623	8.4195	8.3628	8.3492	0	0	0	0	0		8.4131
Hbbt1	1.737e-13	1.261e-12	13.494	13.54	13.764	13.72	13.969	5.2172	5.3074	5.2327	5.3255	5.347		8.41144
Lrrtm4	6.668e-10	1.088e-09	8.7357	8.8811	8.1679	8.7334	7.5384	0	0	0	0	0		8.4113
Brox	1.202e-12	5.729e-12	8.5962	8.2099	8.1809	8.2997	8.7519	0	0	0	0	0		8.40772
Ralgapb	5.589e-12	1.969e-11	8.2766	8.2007	8.3255	8.278	8.9487	0	0	0	0	0		8.4059
Tomm6	2.366e-11	6.298e-11	8.6228	8.7197	8.2279	8.6044	7.8373	0	0	0	0	0		8.40242
Xpo5	1.346e-15	3.176e-14	8.2877	8.501	8.487	8.4396	8.2785	0	0	0	0	0		8.39876
Aplp1	2.326e-14	2.55e-13	8.4149	8.1649	8.4774	8.3536	8.5778	0	0	0	0	0		8.39772
NOGENE	1.142e-07	1.348e-07	8.7221	7.417	8.1533	7.6073	10.081	0	0	0	0	0		8.39614
Dpp8	1.858e-12	8.168e-12	8.7056	8.1898	8.3065	8.1236	8.6496	0	0	0	0	0		8.39502
Dffa	1.007e-11	3.149e-11	8.5415	8.6568	8.4854	8.4639	7.8189	0	0	0	0	0		8.3933
Kyat1	5.651e-12	1.984e-11	8.7221	8.4983	8.2341	8.555	7.9402	0	0	0	0	0		8.38994
Tmcc1	3.511e-11	8.655e-11	8.3841	8.7296	8.5236	8.5721	7.7361	0	0	0	0	0		8.3891
Elp1	1.003e-16	5.051e-15	8.3597	8.4594	8.3246	8.3161	8.4842	0	0	0	0	0		8.3888
Ubxn4	1.858e-12	8.168e-12	8.0422	8.6202	8.5329	8.5714	8.1513	0	0	0	0	0		8.3836
Commd10	5.52e-10	9.201e-10	8.3562	8.6568	8.6738	8.7784	7.4512	0	0	0	0	0		8.38328
Cntnap1	9.272e-14	7.891e-13	8.4684	8.3188	8.2403	8.2211	8.6589	0	0	0	0	0		8.3815
Pck2	7.129e-14	6.53e-13	8.1684	8.2279	8.4296	8.4846	8.5902	0	0	0	0	0		8.38014
Chchd4	2.058e-08	2.59e-08	9.1642	7.6611	7.824	7.7892	9.4576	0	0	0	0	0		8.37922
Rpl22l1	2.212e-14	2.474e-13	8.3242	8.571	8.3584	8.4656	8.1649	0	0	0	0	0		8.37682
Naa10	1.339e-11	3.976e-11	8.6199	8.0954	8.1689	8.1421	8.8549	0	0	0	0	0		8.37624
Slc25a51	8.787e-13	4.468e-12	8.3562	8.1538	8.3461	8.2221	8.7768	0	0	0	0	0		8.371
Unc5c	2.118e-12	9.073e-12	8.6489	8.4491	8.3663	8.4607	7.9224	0	0	0	0	0		8.36948
Zdhhc5	5.179e-10	8.709e-10	8.4975	8.8805	8.2886	8.6889	7.4886	0	0	0	0	0		8.36882
Grm7	4.511e-14	4.448e-13	8.1436	8.5255	8.385	8.5263	8.2626	0	0	0	0	0		8.3686
Csnk1e	9.38e-12	2.984e-11	8.7599	8.5557	7.9617	8.4413	8.1127	0	0	0	0	0		8.36626
Mtx2	4.923e-15	8.458e-14	8.1844	8.4225	8.3768	8.317	8.5255	0	0	0	0	0		8.36524
Ergic1	4.409e-12	1.611e-11	8.0853	8.1664	8.4056	8.3215	8.8445	0	0	0	0	0		8.36466
Oplah	1.148e-12	5.529e-12	8.3492	8.6121	8.4204	8.4838	7.9501	0	0	0	0	0		8.36312
Cpne2	9.542e-15	1.334e-13	8.5165	8.1799	8.2946	8.3358	8.4774	0	0	0	0	0		8.36084
Mrpl49	2.899e-12	1.152e-11	8.284	8.5434	8.5388	8.5357	7.8978	0	0	0	0	0		8.35994
Impad1	5.488e-11	1.25e-10	8.8376	8.4684	8.4162	8.3452	7.7149	0	0	0	0	0		8.35646
Oxsm	8.787e-11	1.855e-10	8.7993	8.555	8.2365	8.5074	7.6717	0	0	0	0	0		8.35398
Lrrc8a	1.823e-16	8.076e-15	8.2987	8.4111	8.2583	8.3318	8.4639	0	0	0	0	0		8.35276
Btf3	1.438e-12	6.638e-12	8.5477	8.4692	8.2955	8.5232	7.9278	0	0	0	0	0		8.35268
Golgb1	1.89e-12	8.281e-12	8.4183	8.5902	8.3641	8.4854	7.9003	0	0	0	0	0		8.35166
Ppp1r12c	3.962e-10	6.881e-10	9.1088	8.3536	8.2403	8.3906	7.6489	0	0	0	0	0		8.34844
Vamp1	1.954e-10	3.72e-10	8.8173	8.1579	7.9224	7.9413	8.8975	0	0	0	0	0		8.34728
Isca2	1.713e-09	2.556e-09	8.3024	8.9545	8.4802	8.6809	7.3165	0	0	0	0	0		8.3469
FAF1	4.321e-11	1.026e-10	8.0067	8.4267	8.7469	8.6809	7.8716	0	0	0	0	0		8.34656
Smu1	3.97e-15	7.285e-14	8.1684	8.2919	8.4692	8.3518	8.45	0	0	0	0	0		8.34626
Acbd3	1.811e-12	8.039e-12	8.7357	8.0773	8.343	8.4237	8.1236	0	0	0	0	0		8.34066
Gsdme	3.004e-14	3.157e-13	8.1684	8.4672	8.4578	8.4191	8.1543	0	0	0	0	0		8.33336
Phf20l1	4.511e-10	7.728e-10	8.6021	8.7918	8.3737	8.4607	7.4321	0	0	0	0	0		8.33208
Nup210	2.461e-13	1.657e-12	8.0246	8.5846	8.4102	8.3518	8.2663	0	0	0	0	0		8.3275
Cpd	3.943e-12	1.475e-11	7.89	8.4963	8.6154	8.4458	8.1809	0	0	0	0	0		8.32568
Acaca	5.009e-18	8.022e-16	8.4149	8.2757	8.3255	8.3015	8.3102	0	0	0	0	0		8.32556
Nid2	1.384e-11	4.085e-11	8.7139	8.3646	8.3759	8.3659	7.7722	0	0	0	0	0		8.3185
Gid8	7.859e-11	1.686e-10	8.1764	8.7512	8.391	8.5981	7.6675	0	0	0	0	0		8.31684
Ube2j1	1.367e-11	4.047e-11	8.1599	8.029	8.3165	8.1669	8.8918	0	0	0	0	0		8.31282
Tbc1d9b	2.975e-16	1.123e-14	8.3876	8.3932	8.2621	8.1849	8.3314	0	0	0	0	0		8.31184
Cldn11	6.929e-09	9.283e-09	8.6431	7.7149	8.014	7.7293	9.4564	0	0	0	0	0		8.31154
Cnot1	2.528e-15	5.049e-14	8.2616	8.4204	8.3038	8.4141	8.1421	0	0	0	0	0		8.3084
Crbn	1.226e-11	3.698e-11	7.8851	8.1303	8.4068	8.3255	8.7843	0	0	0	0	0		8.3064
Wdr12	2.013e-10	3.818e-10	8.9117	8.3602	8.4471	8.2158	7.5954	0	0	0	0	0		8.30604
Cdh6	3.608e-13	2.236e-12	8.529	8.5118	8.1267	8.2987	8.0596	0	0	0	0	0		8.30516
Fibp	4.358e-15	7.692e-14	8.1148	8.3483	8.3255	8.271	8.452	0	0	0	0	0		8.30232
Zpr1	4.562e-12	1.659e-11	8.7599	8.0747	8.3079	8.334	8.0084	0	0	0	0	0		8.29698
Wdr26	7.613e-12	2.509e-11	8.0157	8.571	8.4623	8.5329	7.8985	0	0	0	0	0		8.29608
Cdkn2aip	1.042e-12	5.111e-12	8.2579	8.6268	8.2351	8.385	7.9525	0	0	0	0	0		8.29146
Nt5c2	5.213e-13	3.001e-12	8.0023	8.255	8.3197	8.2374	8.6283	0	0	0	0	0		8.28854
C2cd5	4.39e-12	1.607e-11	8.5932	8.0224	8.1288	8.0634	8.6114	0	0	0	0	0		8.28384
Copg2	1.223e-16	5.985e-15	8.3206	8.3615	8.1972	8.3376	8.1992	0	0	0	0	0		8.28322
Arfgef3	8.772e-13	4.466e-12	8.2541	8.2747	8.0477	8.1584	8.6805	0	0	0	0	0		8.28308
Hecw1	1.3e-13	1.017e-12	8.1883	8.507	8.2715	8.4157	8.0268	0	0	0	0	0		8.28186
G3bp1	7.471e-11	1.62e-10	8.391	8.571	8.2456	8.6162	7.5812	0	0	0	0	0		8.281
Sphkap	1.378e-14	1.763e-13	8.5006	8.2836	8.3079	8.1584	8.1497	0	0	0	0	0		8.28004
Sult4a1	1.123e-11	3.434e-11	7.7569	8.3228	8.6575	8.2351	8.4	0	0	0	0	0		8.27446
Wdr45	1.402e-14	1.777e-13	8.4149	8.3174	8.2905	8.3138	8.0334	0	0	0	0	0		8.274
Fen1	1.32e-10	2.648e-10	8.3421	8.6532	8.3314	8.5322	7.5078	0	0	0	0	0		8.27334
Anxa2	8.748e-14	7.566e-13	8.2616	8.4153	8.2978	8.4068	7.9733	0	0	0	0	0		8.27096
R3hdm2	1.259e-12	5.961e-12	8.3456	8.4794	8.3224	8.3711	7.8361	0	0	0	0	0		8.27092
Qrsl1	3.017e-12	1.191e-11	8.3979	8.507	8.2065	8.4141	7.8067	0	0	0	0	0		8.26644
BC037034	1.626e-14	1.981e-13	8.3979	8.0848	8.2143	8.1992	8.4305	0	0	0	0	0		8.26534
Coro1b	4.093e-10	7.075e-10	11.338	11.21	11.188	11.179	11.246	3.263	2.1375	3.4854	2.926	3.0356		8.2627
Vps36	1.636e-13	1.209e-12	8.3278	8.4541	8.2016	8.3628	7.9536	0	0	0	0	0		8.25998
Carmil2	2.295e-11	6.145e-11	8.7194	8.2974	8.3106	8.2522	7.7101	0	0	0	0	0		8.25794
Mdga2	1.4e-14	1.777e-13	8.3314	8.4421	8.2216	8.2322	8.0585	0	0	0	0	0		8.25716
Spg7	6.371e-14	5.97e-13	8.0422	8.4132	8.3129	8.4085	8.109	0	0	0	0	0		8.25716
Rgs12	3.549e-13	2.212e-12	8.5661	8.2187	8.2896	7.9681	8.2341	0	0	0	0	0		8.25532
Gcdh	4.164e-11	9.953e-11	8.0246	8.7112	8.0006	8.637	7.8966	0	0	0	0	0		8.254
Tmem106b	2.188e-18	5.583e-16	8.2691	8.3142	8.2531	8.2187	8.1903	0	0	0	0	0		8.24908
Abraxas2	4.879e-15	8.426e-14	8.2235	8.1799	8.3188	8.0827	8.4051	0	0	0	0	0		8.242
Rabgap1l	1.859e-14	2.178e-13	8.2235	8.4471	8.1962	8.2946	8.0433	0	0	0	0	0		8.24094
Cpne1	3.171e-09	4.494e-09	8.4384	7.8486	7.7905	7.7951	9.3289	0	0	0	0	0		8.2403
Lancl1	3.489e-14	3.587e-13	8.2235	8.4594	8.0224	8.2909	8.1844	0	0	0	0	0		8.23612
Psmd7	4.476e-13	2.654e-12	8.56	8.2512	7.949	8.1709	8.247	0	0	0	0	0		8.23562
Mef2d	1.65e-10	3.212e-10	8.6802	8.3794	8.2226	8.4208	7.4668	0	0	0	0	0		8.23396
Habp4	6.609e-14	6.16e-13	8.3668	8.0693	8.3536	8.334	8.0107	0	0	0	0	0		8.22688
Nos1ap	1.691e-11	4.794e-11	8.8173	8.052	8.2206	7.9875	8.0301	0	0	0	0	0		8.2215
Vip	8.16e-12	2.66e-11	8.4586	8.5376	8.1007	8.2503	7.7482	0	0	0	0	0		8.21908
Wdr82	6.508e-13	3.542e-12	8.1477	8.1503	8.0949	8.0757	8.6242	0	0	0	0	0		8.21856
Ate1	5.3e-15	8.864e-14	8.4216	8.2172	8.1028	8.2211	8.1272	0	0	0	0	0		8.21798
Ufc1	2.466e-12	1.019e-11	8.4149	8.4225	8.1401	8.3309	7.7781	0	0	0	0	0		8.2173
Bcl7a	2.114e-09	3.096e-09	9.0201	7.8802	7.7053	7.7032	8.7754	0	0	0	0	0		8.21684
Ankrd34b	1.574e-10	3.08e-10	8.2235	8.531	8.3421	8.5298	7.4313	0	0	0	0	0		8.21154
Tapt1	2.374e-13	1.607e-12	7.8704	8.1943	8.3006	8.3785	8.3133	0	0	0	0	0		8.21142
Ptpra	3.372e-13	2.123e-12	7.9519	8.1452	8.1883	8.2167	8.5361	0	0	0	0	0		8.20764
Lingo1	3.841e-07	4.375e-07	10.299	9.8114	9.7859	9.735	10.614	3.2172	0	2.0704	2.0356	1.8875		8.20692
Stam2	3.034e-12	1.194e-11	8.3314	8.388	8.3056	8.2909	7.7142	0	0	0	0	0		8.20602
Ccny	2.337e-11	6.242e-11	8.3097	7.8285	8.1324	7.9801	8.7566	0	0	0	0	0		8.20146
Slc25a1	4.857e-13	2.843e-12	8.1272	7.9949	8.1558	8.1421	8.5763	0	0	0	0	0		8.19926
Setd3	7.094e-13	3.78e-12	8.0596	8.0773	8.1492	8.1017	8.6081	0	0	0	0	0		8.19918
Hdac2	5.837e-15	9.411e-14	8.0596	8.1349	8.1477	8.2621	8.3837	0	0	0	0	0		8.1976
Rims2	2.073e-11	5.645e-11	8.6286	8.4237	7.9478	8.2303	7.7542	0	0	0	0	0		8.19692
Yjefn3	9.702e-12	3.065e-11	8.3097	8.3872	8.3641	8.2886	7.6264	0	0	0	0	0		8.1952
Pcyt1a	1.52e-10	2.99e-10	8.435	8.6312	8.2026	8.2564	7.4421	0	0	0	0	0		8.19346
Kcnj10	5.628e-13	3.172e-12	8.3421	8.1365	7.926	8.0591	8.487	0	0	0	0	0		8.19014
Pgam5	3.355e-12	1.295e-11	7.9704	8.4409	8.3305	8.375	7.8041	0	0	0	0	0		8.18418
Bpgm	2.727e-15	5.357e-14	7.9977	8.255	8.2531	8.2663	8.1431	0	0	0	0	0		8.18304
Arfgap2	1.067e-06	1.192e-06	9.1621	9.3063	9.2586	9.3231	8.7964	0	0	2.1043	2.8278	0		8.18288
Exoc6	2.843e-13	1.853e-12	8.5133	8.236	8.0006	8.0438	8.1153	0	0	0	0	0		8.1818
Tnc	1.336e-13	1.035e-12	8.2197	8.4068	8.0201	8.2965	7.9612	0	0	0	0	0		8.18086
Spty2d1	9.749e-10	1.536e-09	8.6546	7.7774	7.7761	7.7529	8.934	0	0	0	0	0		8.179
Sephs1	1.636e-10	3.19e-10	8.3527	8.4491	8.1709	8.4963	7.388	0	0	0	0	0		8.1714
Hscb	1.813e-12	8.039e-12	8.2002	8.4429	8.2351	8.236	7.7408	0	0	0	0	0		8.171
Olfr267	2.238e-11	6.028e-11	8.5415	8.3142	8.2724	8.1324	7.5932	0	0	0	0	0		8.17074
Sytl2	3.449e-12	1.325e-11	8.2312	8.509	8.225	8.1528	7.7306	0	0	0	0	0		8.16972
Mrps27	7.475e-14	6.736e-13	8.1272	8.4162	8.1231	8.2341	7.9419	0	0	0	0	0		8.1685
Thsd7a	7.954e-13	4.138e-12	8.4013	7.9594	8.1809	7.8972	8.3837	0	0	0	0	0		8.1645
Dnm2	1.236e-13	9.898e-13	8.3133	8.2882	8.2109	8.1553	7.853	0	0	0	0	0		8.16414
Atp5s	1.076e-14	1.439e-13	7.9704	8.2789	8.2682	8.224	8.0688	0	0	0	0	0		8.16206
Ybx1	9.109e-11	1.912e-10	8.2503	8.5755	8.0045	8.4615	7.5133	0	0	0	0	0		8.16102
Gfra2	1.102e-11	3.383e-11	8.0157	7.9738	8.3897	7.8112	8.5962	0	0	0	0	0		8.15732
Rufy1	4.42e-12	1.614e-11	8.0201	8.499	8.1774	8.334	7.7489	0	0	0	0	0		8.15588
Slc20a2	1.313e-12	6.147e-12	8.1684	8.1579	7.9893	7.9087	8.5527	0	0	0	0	0		8.1554
Ranbp9	2.235e-10	4.169e-10	8.0378	8.6158	8.1436	8.5329	7.4313	0	0	0	0	0		8.15228
Nsmf	8.052e-11	1.721e-10	8.7357	8.3097	7.939	8.1272	7.6242	0	0	0	0	0		8.14716
Efl1	1.391e-12	6.454e-12	8.5228	8.0017	8.0488	7.8918	8.2579	0	0	0	0	0		8.1446
Flad1	1.124e-15	2.789e-14	8.1064	8.1365	8.0201	8.1528	8.3024	0	0	0	0	0		8.14364
Slc39a12	2.838e-14	3.02e-13	8.2877	8.1426	7.9443	8.0229	8.2822	0	0	0	0	0		8.13594
Vps51	1.226e-13	9.844e-13	7.9284	8.1184	8.2724	7.9864	8.3619	0	0	0	0	0		8.1335
Sart3	5.157e-13	2.979e-12	8.4216	8.2494	8.1344	7.9715	7.8667	0	0	0	0	0		8.12872
Vps13a	1.024e-07	1.211e-07	9.8552	9.9307	9.8659	9.9148	9.9111	1.8875	2.585	2.0704	0	2.2928		8.1284
Abcf3	1.61e-11	4.617e-11	8.6373	8.1933	8.1028	8.0006	7.706	0	0	0	0	0		8.128
Ccdc9	8.992e-13	4.543e-12	8.1518	8.2303	8.1844	8.3349	7.7211	0	0	0	0	0		8.1245
Aprt	1.113e-12	5.391e-12	8.1639	7.8924	7.9478	8.1038	8.5086	0	0	0	0	0		8.1233
Pdzd11	4.362e-11	1.033e-10	8.0896	8.4225	8.2269	8.3776	7.4741	0	0	0	0	0		8.11814
Hspg2	7.323e-12	2.445e-11	8.1477	8.3987	8.1513	8.2896	7.6029	0	0	0	0	0		8.11804
Ctsa	2.833e-13	1.85e-12	7.7728	8.1277	8.1568	8.2119	8.3097	0	0	0	0	0		8.11578
Xpr1	1.225e-13	9.844e-13	7.8151	8.3142	8.1799	8.1421	8.1054	0	0	0	0	0		8.11134
Rgs7bp	3.849e-14	3.911e-13	8.0682	8.0157	8.0634	8.0163	8.3915	0	0	0	0	0		8.11102
Limch1	1.792e-12	7.978e-12	8.0596	8.3188	8.256	8.2322	7.6844	0	0	0	0	0		8.1102
Acsf3	1.191e-11	3.609e-11	7.8654	8.4275	8.1789	8.3893	7.6858	0	0	0	0	0		8.10938
Vwa5a	5.63e-12	1.98e-11	8.2274	7.9738	7.8985	7.8697	8.5748	0	0	0	0	0		8.10884
Mterf2	4.539e-11	1.069e-10	7.73	8.4713	8.2569	8.4183	7.6625	0	0	0	0	0		8.1078
Sec61a1	1.06e-11	3.276e-11	8.1231	8.0129	7.8405	7.9069	8.646	0	0	0	0	0		8.10588
Fgf12	1.478e-14	1.838e-13	8.2274	8.0875	8.2065	8.1236	7.8741	0	0	0	0	0		8.10382
Chmp1b1	5.681e-11	1.285e-10	8.0938	8.3837	8.1117	8.4508	7.4512	0	0	0	0	0		8.09824
Pnmal2	6.898e-13	3.705e-12	8.3945	7.8623	7.9658	7.9853	8.2803	0	0	0	0	0		8.09764
Pgrmc2	2.865e-12	1.142e-11	8.4878	8.2293	7.7931	8.052	7.9218	0	0	0	0	0		8.0968
Kiaa0319l	2.287e-12	9.615e-12	8.3349	8.1252	8.225	8.1303	7.6453	0	0	0	0	0		8.09214
Qars	1.747e-10	3.377e-10	7.8948	8.5653	8.2133	8.3694	7.4051	0	0	0	0	0		8.08958
Ckmt2	1.723e-10	3.341e-10	11.671	11.893	12.072	12.03	11.591	3.3505	4.3785	3.7655	3.848	3.4725		8.0884
Ptpn1	4.07e-16	1.346e-14	8.0896	8.0307	8.0285	8.0449	8.2413	0	0	0	0	0		8.087
Rtkn	1.968e-14	2.242e-13	8.0768	8.2583	8.0891	8.1401	7.858	0	0	0	0	0		8.08446
Kif1bp	2.776e-13	1.82e-12	8.4047	8.1262	7.8679	8.0334	7.983	0	0	0	0	0		8.08304
Erbb4	3.017e-16	1.131e-14	8.0157	8.1799	8.0537	8.1679	7.9949	0	0	0	0	0		8.08242
Dgkd	1.146e-11	3.489e-11	8.2274	8.4017	8.1246	8.1059	7.543	0	0	0	0	0		8.08052
Tnpo3	2.655e-13	1.761e-12	7.7833	8.2041	8.3006	8.1174	7.987	0	0	0	0	0		8.07848
Cavin1	4.525e-08	5.498e-08	7.8997	8.7221	8.6395	8.5649	6.5454	0	0	0	0	0		8.07432
Lyplal1	3.513e-12	1.344e-11	7.8753	8.3394	8.1523	8.3006	7.6977	0	0	0	0	0		8.07306
Gna11	2.417e-07	2.786e-07	9.9067	9.6489	9.913	9.7877	10.63	2.3505	2.3785	0	2.406	2.406		8.06906
Ppm1l	3.43e-10	6.054e-10	8.1022	8.5196	8.137	8.3461	7.2394	0	0	0	0	0		8.06886
Sestd1	6.282e-13	3.448e-12	8.1962	8.1933	8.0736	8.1689	7.6703	0	0	0	0	0		8.06046
Tm9sf3	2.225e-14	2.481e-13	7.9658	7.8912	8.1007	8.0591	8.2785	0	0	0	0	0		8.05906
Sntb2	3.812e-10	6.653e-10	8.1396	8.2859	7.987	8.6099	7.2649	0	0	0	0	0		8.05746
Cdh2	1.009e-12	4.988e-12	10.373	10.699	10.524	10.67	10.395	2.5607	2.2016	2.6323	2.3785	2.6088		8.05582
Mycbp2	2.883e-12	1.148e-11	7.975	8.1349	8.3584	8.1624	7.6352	0	0	0	0	0		8.05318
Pmpcb	1.885e-12	8.269e-12	8.2541	8.2826	7.9571	8.1085	7.6561	0	0	0	0	0		8.05168
Ndufb6	2.098e-10	3.955e-10	7.9189	8.5446	8.0784	8.3685	7.3478	0	0	0	0	0		8.05164
Bola2	2.134e-10	4.009e-10	7.8555	8.501	8.138	8.4085	7.3549	0	0	0	0	0		8.05158
Vipas39	9.831e-13	4.883e-12	7.9284	7.7918	8.0725	8.029	8.4254	0	0	0	0	0		8.04942
Sv2a	2.669e-11	6.956e-11	12.882	12.632	12.608	12.539	13.209	4.8826	4.3363	4.8125	4.7225	4.8777		8.04768
Etnppl	7.143e-12	2.4e-11	8.1804	8.3785	8.0129	8.1007	7.5622	0	0	0	0	0		8.04694
Acox1	2.449e-16	9.804e-15	7.9704	8.1513	8.12	7.9836	8.0034	0	0	0	0	0		8.04574
Xrn2	1.222e-13	9.844e-13	7.9519	8.098	7.7859	8.263	8.1241	0	0	0	0	0		8.04458
Zfyve19	3.575e-15	6.677e-14	8.0725	8.1059	8.1467	8.0323	7.8455	0	0	0	0	0		8.04058
Kiaa1522	3.562e-11	8.76e-11	8.0422	8.3837	8.0922	8.2593	7.4246	0	0	0	0	0		8.0404
Uap1	3.597e-13	2.233e-12	7.9704	8.2075	8.1447	8.1563	7.6997	0	0	0	0	0		8.03572
Cisd3	3.952e-13	2.401e-12	7.9932	7.9266	8.024	7.8342	8.3859	0	0	0	0	0		8.03278
Lamp2	3.57e-12	1.36e-11	8.2158	7.9087	7.6823	7.9571	8.3927	0	0	0	0	0		8.03132
Sdc4	2.223e-09	3.246e-09	9.0725	7.6439	7.7218	7.5804	8.136	0	0	0	0	0		8.03092
Iqcb1	1.51e-11	4.374e-11	8.5196	7.8741	8.0891	8.052	7.6147	0	0	0	0	0		8.0299
Cnot2	2.65e-15	5.225e-14	7.8997	8.0307	8.1246	8.1528	7.9325	0	0	0	0	0		8.02806
Abl2	1.947e-11	5.355e-11	8.4047	8.2812	7.8574	8.0449	7.5446	0	0	0	0	0		8.02656
Vac14	4.366e-15	7.692e-14	8.1106	7.9767	8.0864	7.8379	8.1189	0	0	0	0	0		8.0261
Ccs	5.6e-12	1.972e-11	8.445	7.8157	7.8906	7.7602	8.2114	0	0	0	0	0		8.02458
Hmg20a	2.537e-15	5.049e-14	8.1639	8.0329	8.0736	7.991	7.8605	0	0	0	0	0		8.02438
Nudt4	4.69e-11	1.095e-10	8.0246	8.2327	8.2303	8.2583	7.3584	0	0	0	0	0		8.02086
Cggbp1	6.844e-11	1.503e-10	8.1804	8.2771	8.1679	8.1624	7.3074	0	0	0	0	0		8.01904
Amt	9.408e-13	4.708e-12	8.0378	8.12	8.0433	8.2522	7.6272	0	0	0	0	0		8.0161
Ubash3b	4.792e-15	8.305e-14	7.9565	7.9692	8.1709	7.871	8.1038	0	0	0	0	0		8.01428
Haghl	4.833e-10	8.197e-10	7.9331	8.5098	8.1231	8.3111	7.1809	0	0	0	0	0		8.0116
Atxn7l3b	4.455e-15	7.796e-14	8.0596	8.0251	8.0752	8.0827	7.7977	0	0	0	0	0		8.00806
Htt	1.53e-13	1.144e-12	7.8151	8.0612	7.8906	7.9536	8.2942	0	0	0	0	0		8.00294
Cd200	1.674e-11	4.754e-11	11.231	11.465	11.44	11.605	11.096	3.4594	3.7549	3.0531	3.2016	3.3646		8.00068
Lgmn	5.321e-13	3.04e-12	8.1148	8.1339	7.9207	8.1774	7.6532	0	0	0	0	0		8
Ephb3	3.986e-12	1.486e-11	7.9796	8.3514	8.0213	8.0602	7.5699	0	0	0	0	0		7.99648
Rps29	9.895e-14	8.236e-13	8.0246	8.1401	7.7602	8.1709	7.8685	0	0	0	0	0		7.99286
Msrb2	2.474e-13	1.664e-12	7.975	8.2211	8.1096	7.9606	7.6949	0	0	0	0	0		7.99224
Bckdhb	2.05e-16	8.667e-15	7.8851	8.029	8.1007	7.9853	7.9501	0	0	0	0	0		7.99004
Lama2	3.268e-10	5.813e-10	7.4085	8.1339	8.5046	8.3478	7.5523	0	0	0	0	0		7.98942
Tdrd3	3.086e-09	4.388e-09	8.7056	8.1553	7.9658	8.1699	6.9472	0	0	0	0	0		7.98876
Sqstm1	1.254e-15	3.04e-14	7.9284	7.8894	7.9733	8.1553	7.9927	0	0	0	0	0		7.98782
Ilkap	5.875e-11	1.325e-10	8.1518	8.2007	8.137	8.1487	7.2863	0	0	0	0	0		7.9849
Pcdh7	2.441e-11	6.447e-11	8.3737	8.2254	7.8486	7.996	7.4717	0	0	0	0	0		7.98308
Clmn	6.2e-12	2.146e-11	7.5384	7.8297	8.0795	8.1659	8.2729	0	0	0	0	0		7.97728
Vps33b	3.06e-11	7.743e-11	7.4421	7.8189	8.2331	8.0406	8.3487	0	0	0	0	0		7.97668
Fxr1	3.045e-12	1.198e-11	8.2274	8.0558	7.5638	7.8517	8.1654	0	0	0	0	0		7.97282
Lars2	5.082e-17	3.123e-15	7.8654	8.0017	7.953	8.0449	7.9972	0	0	0	0	0		7.97244
Lman2l	2.272e-13	1.564e-12	8.2465	7.9583	7.8598	7.7347	8.058	0	0	0	0	0		7.97146
Hexim1	1.772e-10	3.422e-10	8.4782	8.1799	7.8253	8.0848	7.2854	0	0	0	0	0		7.97072
Pcna	2.519e-11	6.614e-11	8.2616	8.1749	7.953	8.0736	7.3742	0	0	0	0	0		7.96746
Borcs5	5.471e-13	3.099e-12	7.9236	8.1303	8.0384	8.1344	7.6103	0	0	0	0	0		7.9674
Rbm12	1.953e-12	8.467e-12	7.8041	8.0493	7.9519	8.347	7.6809	0	0	0	0	0		7.96664
Srp54	1.221e-07	1.439e-07	9.5337	9.8697	9.7753	9.7915	9.6692	2.263	2	2.585	0	1.9635		7.96558
Ptprd	1.34e-11	3.976e-11	11.741	11.834	11.737	11.813	11.113	3.7004	3.6206	3.8379	3.7334	3.5236		7.96442
Ppp4r4	3.328e-15	6.282e-14	8.098	8.014	7.8747	8.0135	7.8163	0	0	0	0	0		7.9633
Srp19	3.079e-11	7.776e-11	8.0067	8.2303	8.0864	8.1477	7.3345	0	0	0	0	0		7.96112
Mrpl52	1.525e-09	2.297e-09	7.6402	8.4882	8.3165	8.2673	7.079	0	0	0	0	0		7.95824
Pip5k1a	9.886e-15	1.361e-13	7.7833	7.9366	7.9893	7.9272	8.1482	0	0	0	0	0		7.95692
Pdzd8	1.793e-11	5.016e-11	8.4911	7.8851	7.8183	7.9864	7.582	0	0	0	0	0		7.95258
Scai	2.541e-15	5.049e-14	7.8304	8.0318	7.8918	7.9021	8.0996	0	0	0	0	0		7.95114
Ttc33	1.64e-10	3.196e-10	8.7357	7.8424	7.7004	7.6893	7.7872	0	0	0	0	0		7.951
Rpgr	1.197e-11	3.62e-11	7.9472	8.2607	8.0312	8.0917	7.417	0	0	0	0	0		7.94956
Polr2l	5.942e-10	9.824e-10	7.8304	8.4923	8.0285	8.2644	7.1303	0	0	0	0	0		7.94918
Nipal3	1.897e-11	5.24e-11	8.1844	8.2327	7.9063	8.0301	7.3897	0	0	0	0	0		7.94864
AI837181	3.94e-10	6.847e-10	7.8605	8.4733	7.8771	8.3179	7.2046	0	0	0	0	0		7.94668
Scrib	1.174e-10	2.391e-10	7.8405	8.271	8.1503	8.2187	7.247	0	0	0	0	0		7.9455
Iqgap2	3.799e-13	2.343e-12	7.9472	8.139	8.0079	8.0356	7.5962	0	0	0	0	0		7.94518
Ube2e1	4.1e-15	7.42e-14	7.8802	8.0129	8.0345	8.0251	7.7662	0	0	0	0	0		7.94378
Slc25a20	1.843e-10	3.533e-10	8.1064	7.5835	7.7529	7.6184	8.6571	0	0	0	0	0		7.94366
Gm1971	3.997e-09	5.583e-09	8.4483	8.4842	7.8814	8.0509	6.853	0	0	0	0	0		7.94356
Snx32	5.149e-10	8.661e-10	7.9887	8.3828	8.0356	8.2351	7.0736	0	0	0	0	0		7.94316
Stau2	1.499e-11	4.348e-11	8.0334	7.9989	8.1734	8.1215	7.3654	0	0	0	0	0		7.93852
Lnpep	4.23e-17	2.83e-15	7.8605	8.04	7.939	7.9384	7.9039	0	0	0	0	0		7.93636
Sdf4	3.206e-13	2.044e-12	8.0639	8.1503	7.9744	7.8424	7.6337	0	0	0	0	0		7.93294
Hcls1	2.045e-12	8.808e-12	7.8253	8.0693	7.9819	8.224	7.5546	0	0	0	0	0		7.93102
Pin4	6.959e-10	1.13e-09	8.6431	7.5078	7.717	7.4496	8.3309	0	0	0	0	0		7.92968
Ncbp1	1.885e-12	8.269e-12	7.7354	8.1158	7.5804	8.0406	8.1492	0	0	0	0	0		7.92428
Xpo1	7.416e-12	2.47e-11	10.759	10.789	10.849	10.756	11.129	2.6554	3.0179	2.7442	3.3074	2.9449		7.92244
Prex2	9.566e-14	8.051e-13	7.9141	8.1589	8.0213	7.7741	7.7408	0	0	0	0	0		7.92184
Ppp6r3	1.827e-10	3.508e-10	7.9887	7.5461	7.7129	7.6837	8.6668	0	0	0	0	0		7.91964
Rab9b	4.388e-12	1.607e-11	7.7354	8.014	8.263	8.0384	7.5461	0	0	0	0	0		7.91938
Pacsin3	3.153e-12	1.233e-11	8.3024	7.6511	7.9692	7.6703	7.9972	0	0	0	0	0		7.91804
Trappc9	4.36e-14	4.331e-13	7.6745	7.9536	7.9015	8.1117	7.9466	0	0	0	0	0		7.91758
Larp4b	4.29e-07	4.873e-07	9.8427	7.8348	7.5554	7.8015	6.55	0	0	0	0	0		7.91688
Katnb1	1.301e-15	3.118e-14	7.7833	8.0639	7.8906	7.8997	7.9431	0	0	0	0	0		7.91612
Ptpmt1	1.661e-13	1.221e-12	7.9045	8.1589	8.0301	7.7655	7.7074	0	0	0	0	0		7.91328
Fmnl1	4.567e-11	1.074e-10	8.1724	8.2007	7.7115	8.1303	7.3416	0	0	0	0	0		7.9113
Kalrn	1.186e-08	1.542e-08	7.8605	8.6319	8.0821	8.3188	6.6582	0	0	0	0	0		7.9103
Ggt7	1.036e-11	3.228e-11	8.0682	8.1849	7.3776	7.9413	7.9721	0	0	0	0	0		7.90882
Diaph2	1.018e-11	3.179e-11	7.8304	7.8125	7.6132	7.8474	8.4384	0	0	0	0	0		7.90838
Mcf2l	2.21e-10	4.132e-10	7.4421	8.5224	8.0547	8.058	7.4619	0	0	0	0	0		7.90782
Nav3	1.821e-12	8.047e-12	8.208	8.0693	7.7905	7.9111	7.5592	0	0	0	0	0		7.90762
Paip2	1.497e-09	2.259e-09	7.89	8.3654	8.1221	8.2422	6.9141	0	0	0	0	0		7.90676
Kcnd3	9.037e-13	4.557e-12	7.9472	7.7197	7.8144	7.7549	8.2845	0	0	0	0	0		7.90414
Babam1	3.539e-09	4.98e-09	8.6081	8.2007	7.9129	7.9396	6.8567	0	0	0	0	0		7.9036
Ube2h	2.337e-08	2.926e-08	8.5507	7.2937	7.3001	7.3478	9.0204	0	0	0	0	0		7.90254
Chn1	1.223e-13	9.844e-13	7.6745	7.7886	8.0922	7.8839	8.065	0	0	0	0	0		7.90084
Rgs7	2.709e-10	4.926e-10	12.136	11.984	11.797	11.848	11.913	4.6668	3.797	3.4594	4.1127	4.1619		7.89604
Dguok	1.927e-14	2.214e-13	7.708	7.9207	7.9366	8.0896	7.8234	0	0	0	0	0		7.89566
Usp31	1.555e-10	3.05e-10	8.2729	8.278	7.7748	7.9087	7.2172	0	0	0	0	0		7.89032
Scpep1	1.014e-09	1.591e-09	8.2119	8.2974	7.9583	8.052	6.9296	0	0	0	0	0		7.88984
Macrod1	1.026e-11	3.198e-11	7.7569	8.3527	7.8814	7.9437	7.5014	0	0	0	0	0		7.88722
Efnb1	4.315e-12	1.585e-11	7.799	8.107	8.137	7.9301	7.4512	0	0	0	0	0		7.88486
Trim31	4.392e-14	4.355e-13	7.9658	7.6575	7.831	7.8918	8.0779	0	0	0	0	0		7.8848
Ankrd29	1.873e-11	5.197e-11	8.0112	8.2163	7.7859	8.052	7.3514	0	0	0	0	0		7.88336
Cox7b	7.451e-12	2.474e-11	8.2766	7.8157	7.7039	7.5306	8.0827	0	0	0	0	0		7.8819
Pir	6.553e-12	2.244e-11	8.1148	8.0757	7.8869	7.9472	7.3837	0	0	0	0	0		7.88166
Edil3	2.841e-13	1.853e-12	8.0067	8.1033	7.6949	7.9337	7.6482	0	0	0	0	0		7.87736
Chchd1	1.369e-13	1.052e-12	7.9236	8.0991	7.949	7.7977	7.6169	0	0	0	0	0		7.87726
Commd3	4.278e-14	4.259e-13	8.0246	7.9554	7.9236	7.8605	7.6177	0	0	0	0	0		7.87636
Selenoo	2.122e-15	4.451e-14	7.7886	7.9864	7.7787	7.996	7.8278	0	0	0	0	0		7.8755
Ppp1r37	4.225e-11	1.008e-10	7.6632	8.2826	8.097	7.9801	7.3487	0	0	0	0	0		7.87432
Pym1	8.974e-12	2.883e-11	8.2503	7.9921	7.8086	7.9009	7.4145	0	0	0	0	0		7.87328
Rnf148	1.3e-09	1.982e-09	7.2724	7.6596	7.6717	8.7908	7.9495	0	0	0	0	0		7.8688
Pde6d	8.181e-22	4.324e-18	7.8605	7.8542	7.8623	7.8623	7.8972	0	0	0	0	0		7.8673
Prrc2b	7.38e-12	2.461e-11	8.1684	8.0811	7.6453	7.9704	7.4709	0	0	0	0	0		7.86722
Nop10	1.087e-09	1.693e-09	7.9932	8.3452	7.8297	8.2279	6.939	0	0	0	0	0		7.867
Pex5	2.47e-12	1.02e-11	7.5006	7.7381	8.0526	7.8802	8.1553	0	0	0	0	0		7.86536
Arhgef9	3.127e-13	2e-12	7.9378	7.8093	7.6837	7.7115	8.1734	0	0	0	0	0		7.86314
Mmaa	1.069e-10	2.198e-10	7.8654	8.1918	8.1298	7.9658	7.1558	0	0	0	0	0		7.86172
Map2k2	4.324e-15	7.692e-14	7.7025	7.8654	7.8654	8.0301	7.8285	0	0	0	0	0		7.85838
Flot1	1.791e-11	5.016e-11	10.923	10.929	10.928	10.91	10.819	2.7866	3.2327	2.6323	3.1375	3.433		7.85738
Naa35	1.806e-14	2.121e-13	8.0768	7.8954	7.7688	7.8138	7.7197	0	0	0	0	0		7.8549
Smad4	1.403e-13	1.073e-12	7.73	7.8954	8.0656	7.9559	7.6125	0	0	0	0	0		7.85188
Peli2	5.069e-10	8.554e-10	8.7029	7.6731	7.7748	7.7515	7.3567	0	0	0	0	0		7.8518
Trip11	3.735e-11	9.098e-11	8.1189	8.1324	7.719	8.0135	7.2733	0	0	0	0	0		7.85142
Dnajb5	5.572e-16	1.712e-14	7.9236	7.8486	7.853	7.7032	7.926	0	0	0	0	0		7.85088
Sarnp	5.712e-12	1.998e-11	11.109	10.993	10.753	10.902	10.509	3.1538	2.8679	3.2172	2.8679	2.9069		7.85046
Xrn1	1.201e-10	2.44e-10	8.3456	8.1664	7.6575	7.8003	7.2817	0	0	0	0	0		7.8503
Swi5	1.205e-08	1.565e-08	8.7863	8.0928	7.8253	7.8411	6.6991	0	0	0	0	0		7.84892
Paf1	3.373e-10	5.968e-10	8.0768	8.1416	7.7957	8.1859	7.0345	0	0	0	0	0		7.8469
Gm45927	1.89e-14	2.197e-13	7.975	7.9378	7.7589	7.9159	7.6424	0	0	0	0	0		7.846
Flot1	1.846e-11	5.137e-11	10.923	10.917	10.913	10.898	10.798	2.7866	3.2327	2.6323	3.1375	3.433		7.84538
Nanp	1.945e-10	3.706e-10	7.5569	8.2279	7.9994	8.2269	7.2133	0	0	0	0	0		7.84488
Arsa	1.742e-10	3.371e-10	8.4586	7.8802	7.6162	7.9921	7.2752	0	0	0	0	0		7.84446
Mief1	1.469e-14	1.831e-13	7.7354	8.0656	7.8436	7.8436	7.7293	0	0	0	0	0		7.8435
Hddc2	4.858e-14	4.746e-13	7.6344	7.8202	7.9784	8.0185	7.7609	0	0	0	0	0		7.84248
Fam117b	8.369e-09	1.108e-08	8.683	7.9989	7.8144	8.0112	6.7032	0	0	0	0	0		7.84214
Hdac4	1.331e-13	1.033e-12	7.9284	7.9408	7.7702	8.009	7.5622	0	0	0	0	0		7.84212
Endod1	8.392e-12	2.729e-11	7.799	8.139	7.6823	8.1334	7.4396	0	0	0	0	0		7.83866
Pam	2.603e-15	5.152e-14	7.8802	7.6802	7.8839	7.9646	7.782	0	0	0	0	0		7.83818
Pcmtd1	1.292e-10	2.597e-10	8.3133	8.1365	7.8041	7.7204	7.2143	0	0	0	0	0		7.83772
Flnb	1.599e-11	4.592e-11	7.8041	8.0811	7.9571	8.052	7.2854	0	0	0	0	0		7.83594
Lims1	5.238e-13	3.006e-12	7.6914	7.9075	8.1096	7.9033	7.5615	0	0	0	0	0		7.83466
Sacs	1.269e-13	9.996e-13	7.5446	7.9015	8.0274	7.866	7.8291	0	0	0	0	0		7.83372
Pcyt1b	7.053e-11	1.542e-10	8.1518	8.1624	7.7569	7.8411	7.2007	0	0	0	0	0		7.82258
3110040N11Rik	9.438e-10	1.491e-09	7.719	8.1441	7.8734	8.3906	6.9623	0	0	0	0	0		7.81788
Rhof	7.637e-14	6.794e-13	7.719	8.0731	7.8449	7.8221	7.6294	0	0	0	0	0		7.8177
Mocs3	3.036e-13	1.957e-12	7.9141	7.8716	7.9129	7.9159	7.4627	0	0	0	0	0		7.81544
Nacad	4.424e-11	1.046e-10	7.9519	8.1824	7.7115	7.9767	7.2192	0	0	0	0	0		7.80834
Sv2b	5.621e-10	9.344e-10	11.59	11.452	11.852	11.582	12.585	3.9165	3.9819	3.9165	3.8176	4.3923		7.80724
Ankrd34a	2.856e-09	4.088e-09	7.8851	8.3206	7.9224	8.1584	6.7361	0	0	0	0	0		7.80452
Cpne8	5.618e-09	7.662e-09	8.5228	7.1928	7.3663	7.3759	8.5641	0	0	0	0	0		7.80438
Kmo	1.729e-10	3.349e-10	7.2798	7.8894	8.2133	8.2148	7.4187	0	0	0	0	0		7.8032
Mtus2	1.185e-15	2.913e-14	7.8851	7.8467	7.8654	7.6446	7.7649	0	0	0	0	0		7.80134
Ccdc90b	3.841e-17	2.674e-15	7.7938	7.7905	7.7428	7.7602	7.9075	0	0	0	0	0		7.79896
Agtpbp1	6.371e-13	3.478e-12	7.7462	7.9664	7.8654	7.9658	7.4454	0	0	0	0	0		7.79784
Nop58	8.528e-13	4.372e-12	7.9658	7.6525	7.6199	7.6417	8.109	0	0	0	0	0		7.79778
Agrn	3.008e-11	7.639e-11	7.8151	8.1824	7.8041	7.9484	7.2298	0	0	0	0	0		7.79596
Aamp	1.931e-13	1.362e-12	7.6689	7.8574	7.8784	8.0218	7.5477	0	0	0	0	0		7.79484
Erp44	6.653e-11	1.468e-10	10.671	10.809	10.825	10.805	10.545	3.0875	3.121	2.2928	3.2016	2.9819		7.79404
OTTMUSWSBG00059279	2.963e-14	3.139e-13	8.0246	7.782	7.6611	7.6717	7.8291	0	0	0	0	0		7.7937
Tmeff2	5.06e-11	1.164e-10	7.7569	7.2715	7.9027	7.7231	8.3142	0	0	0	0	0		7.79368
Rps6kc1	1.521e-13	1.14e-12	7.6402	7.9218	7.7469	8.029	7.6103	0	0	0	0	0		7.78964
Ap3s1	6.426e-14	6.003e-13	7.5992	8.0207	7.7957	7.8449	7.676	0	0	0	0	0		7.7873
Ubxn1	4.094e-10	7.076e-10	8.445	7.9015	7.7245	7.784	7.0811	0	0	0	0	0		7.78722
Adgrb2	2.845e-15	5.508e-14	7.6051	7.7983	7.9081	7.7964	7.8093	0	0	0	0	0		7.78344
Myh1	7.255e-09	9.692e-09	8.4619	8.1513	7.7918	7.8857	6.6221	0	0	0	0	0		7.78256
Ythdf1	1.857e-13	1.323e-12	7.9378	7.7951	7.9542	7.7101	7.5022	0	0	0	0	0		7.77988
Frmpd4	1.138e-12	5.49e-12	7.6914	8.0677	7.8297	7.8623	7.4388	0	0	0	0	0		7.77798
Nwd2	7.675e-15	1.135e-13	7.9472	7.7482	7.5999	7.7912	7.8009	0	0	0	0	0		7.77748
Arfip2	2.945e-08	3.649e-08	9.0941	9.3895	9.0626	9.3781	8.7728	1.585	0	1.6781	2.0704	1.4854		7.77564
Lactb2	9.603e-12	3.043e-11	7.5569	8.1059	7.9117	7.9313	7.3646	0	0	0	0	0		7.77408
Adcyap1r1	3.686e-11	8.998e-11	7.7728	8.1764	7.6575	8.0101	7.2403	0	0	0	0	0		7.77142
Slc4a4	8.075e-09	1.071e-08	11.212	11.162	11.232	11.133	11.583	3.7442	3.4594	2.3505	3.7655	4.1457		7.77134
Folh1	1.468e-11	4.283e-11	7.3461	7.9664	8.0634	7.9583	7.5062	0	0	0	0	0		7.76808
Ppp1r21	3.388e-12	1.303e-11	11.444	11.609	11.589	11.5	11.386	3.5729	3.926	3.6323	3.4983	4.079		7.7639
Polb	3.112e-10	5.564e-10	7.89	8.1148	7.8157	8.0406	6.9507	0	0	0	0	0		7.76236
Lgi2	1.428e-14	1.796e-13	7.9093	7.6257	7.8015	7.8505	7.6125	0	0	0	0	0		7.7599
Mtpap	9.92e-16	2.561e-14	7.611	7.8189	7.7886	7.7204	7.8542	0	0	0	0	0		7.75862
Usp11	6.593e-15	1.026e-13	7.6051	7.7562	7.7129	7.7741	7.9413	0	0	0	0	0		7.75792
Utrn	1.359e-13	1.049e-12	7.7136	7.9989	7.6417	7.8722	7.5584	0	0	0	0	0		7.75696
Unc5a	1.297e-13	1.017e-12	7.4487	7.8697	7.7774	7.8099	7.8753	0	0	0	0	0		7.7562
Khdrbs3	1.153e-09	1.782e-09	12.057	12.267	12.183	12.294	11.239	4.2095	4.7918	4.2928	4.0531	3.9165		7.75526
Diras1	6.722e-15	1.033e-13	7.6575	7.9594	7.7156	7.7046	7.6879	0	0	0	0	0		7.745
Fgb	1.306e-10	2.623e-10	7.4619	8.1689	7.9796	7.946	7.1548	0	0	0	0	0		7.74224
Mad1l1	1.06e-11	3.276e-11	7.6632	8.0585	7.6928	7.9932	7.2919	0	0	0	0	0		7.73992
Unc13a	2.065e-13	1.442e-12	10.587	10.7	10.702	10.654	10.599	3	3.0531	2.6088	2.8875	3		7.73852
Ndufaf7	3.521e-10	6.194e-10	8.284	8.0821	7.5954	7.6625	7.0607	0	0	0	0	0		7.73694
Tnrc6b	1.414e-10	2.809e-10	7.7515	8.2384	7.8086	7.8074	7.0629	0	0	0	0	0		7.73376
Ptprf	1.86e-09	2.758e-09	7.9796	8.1883	7.7846	7.9949	6.7184	0	0	0	0	0		7.73316
Lclat1	2.618e-14	2.812e-13	7.9425	7.8253	7.6132	7.6402	7.6446	0	0	0	0	0		7.73316
Zc3h4	5.055e-13	2.938e-12	7.8354	7.9583	7.7279	7.7306	7.3966	0	0	0	0	0		7.72976
Nars	5.197e-12	1.851e-11	11.149	11.022	11.077	11.063	11.62	3.3074	3.5236	3.6439	3.433	3.3785		7.72892
Sorcs1	7.596e-14	6.778e-13	7.7728	7.9117	7.7039	7.7827	7.4652	0	0	0	0	0		7.72726
Capn1	3.467e-16	1.225e-14	7.8704	7.7115	7.6914	7.7087	7.6511	0	0	0	0	0		7.72662
Lman1	5.851e-14	5.582e-13	7.4749	7.7394	7.6668	7.8234	7.8857	0	0	0	0	0		7.71804
Atrx	4.929e-15	8.458e-14	7.8851	7.7787	7.5925	7.6879	7.6388	0	0	0	0	0		7.7166
Casc4	2.148e-12	9.163e-12	7.8505	7.7347	7.3811	7.5729	8.0296	0	0	0	0	0		7.71376
Pak7	1.696e-11	4.802e-11	7.7675	8.0224	7.717	7.8839	7.1739	0	0	0	0	0		7.71294
Cnot11	2.539e-11	6.659e-11	7.2114	7.6439	8.0056	7.6489	8.0547	0	0	0	0	0		7.7129
Csmd2	2.628e-12	1.069e-11	7.2574	7.8741	7.8392	7.7814	7.8028	0	0	0	0	0		7.71098
Pmpca	3.899e-14	3.94e-13	7.8151	7.5577	7.6963	7.5759	7.9075	0	0	0	0	0		7.7105
Serpinb6a	1.13e-11	3.454e-11	10.945	11.253	11.35	11.369	11.355	3.848	3.6439	3.6554	3.3505	3.2327		7.7083
Ctrl	5.043e-10	8.517e-10	8.4878	7.6439	7.6575	7.6388	7.1085	0	0	0	0	0		7.7073
Cmc1	1.012e-12	4.994e-12	7.8753	7.8297	7.7245	7.7715	7.3092	0	0	0	0	0		7.70204
Rpl36	1.022e-13	8.463e-13	7.6575	7.9147	7.6417	7.817	7.4741	0	0	0	0	0		7.701
Pnpla8	3.443e-11	8.527e-11	7.8151	7.5423	7.4128	7.4652	8.2677	0	0	0	0	0		7.70062
Igkv8-30	1.607e-12	7.258e-12	7.6745	7.7629	7.8265	7.9313	7.3038	0	0	0	0	0		7.6998
Matk	5.511e-15	9.072e-14	7.7354	7.8297	7.6402	7.7576	7.5243	0	0	0	0	0		7.69744
Chrm3	5.765e-13	3.211e-12	7.6632	7.6344	7.6781	7.4668	8.0438	0	0	0	0	0		7.69726
Rprd2	2.014e-12	8.696e-12	7.6689	7.9989	7.7156	7.7827	7.3165	0	0	0	0	0		7.69652
Gpcpd1	6.685e-11	1.474e-10	7.0811	8.0493	7.7279	7.9801	7.6424	0	0	0	0	0		7.69616
Tma7	6.473e-10	1.059e-09	7.8555	8.0747	7.929	7.8183	6.8009	0	0	0	0	0		7.69568
Rin1	8.753e-13	4.465e-12	7.6632	8.0045	7.6668	7.7562	7.3837	0	0	0	0	0		7.69488
Wwc2	2.013e-11	5.495e-11	7.8997	7.7741	7.824	7.8636	7.1106	0	0	0	0	0		7.6944
Pde12	4.327e-13	2.584e-12	7.5006	7.879	7.824	7.8074	7.4396	0	0	0	0	0		7.69012
Cd2ap	3.554e-09	5e-09	7.8802	8.2422	7.799	7.926	6.6014	0	0	0	0	0		7.68976
Fubp3	3.981e-12	1.486e-11	7.9331	7.8361	7.5622	7.8354	7.2761	0	0	0	0	0		7.68858
Ubtf	2.238e-15	4.621e-14	7.7886	7.5984	7.7918	7.6997	7.5638	0	0	0	0	0		7.68846
Kif3c	9.758e-12	3.077e-11	7.6286	7.9893	7.7886	7.8329	7.2016	0	0	0	0	0		7.6882
Atp2c1	1.064e-11	3.284e-11	7.2798	7.7609	7.6279	7.6294	8.1246	0	0	0	0	0		7.68452
L2hgdh	6.616e-10	1.081e-09	7.6169	8.1824	7.6081	8.1075	6.9069	0	0	0	0	0		7.68436
Abcd2	2.672e-11	6.956e-11	7.8802	8.0493	7.5887	7.7401	7.1538	0	0	0	0	0		7.68242
Cdc5l	9.63e-12	3.047e-11	7.8041	7.9641	7.6213	7.8183	7.1888	0	0	0	0	0		7.67932
Nif3l1	5.425e-13	3.083e-12	7.719	7.9796	7.6532	7.6431	7.394	0	0	0	0	0		7.67778
Ppm1f	2.615e-17	2.134e-15	7.6632	7.7629	7.6081	7.6337	7.697	0	0	0	0	0		7.67298
Cpt1c	1.59e-10	3.105e-10	7.7136	8.0318	7.676	7.9704	6.9612	0	0	0	0	0		7.6706
Mfsd4a	3.488e-10	6.149e-10	7.7781	7.4479	7.1719	7.5141	8.4111	0	0	0	0	0		7.66462
Rps24	3.108e-10	5.558e-10	11.188	11.137	11.259	11.103	11.117	3.0179	3.2016	4.0356	3.2928	3.9355		7.66412
Ccz1	7.213e-13	3.82e-12	7.4085	7.5984	7.6851	7.611	8.0023	0	0	0	0	0		7.66106
Edc4	1.695e-12	7.613e-12	7.646	7.4806	7.5181	7.5699	8.0736	0	0	0	0	0		7.65764
Ccdc127	2.539e-18	5.663e-16	7.6228	7.7266	7.6228	7.6717	7.6301	0	0	0	0	0		7.6548
Jph1	1.717e-15	3.766e-14	7.6286	7.56	7.7931	7.719	7.5638	0	0	0	0	0		7.6529
Ptbp2	1.062e-09	1.656e-09	10.267	10.4	10.293	10.416	10.385	2.7442	3.5729	2.4854	2.5607	2.1375		7.65206
Nup153	3.033e-12	1.194e-11	7.8253	7.8486	7.7428	7.625	7.2163	0	0	0	0	0		7.6516
NOGENE	5.042e-14	4.871e-13	7.8654	7.4782	7.7428	7.5515	7.6095	0	0	0	0	0		7.64948
Fam171a1	2.516e-12	1.033e-11	7.6286	7.9378	7.6639	7.7642	7.2517	0	0	0	0	0		7.64924
Armcx3	3.884e-12	1.458e-11	7.2114	7.8697	7.7556	7.8183	7.5842	0	0	0	0	0		7.64784
Ddhd2	2.662e-12	1.081e-11	7.339	7.8881	7.6589	7.9009	7.4446	0	0	0	0	0		7.6463
Kcnd2	2.828e-11	7.294e-11	7.8704	7.8759	7.3906	7.9147	7.1699	0	0	0	0	0		7.6443
Ube2q1	3.424e-13	2.149e-12	7.9612	7.563	7.4512	7.5515	7.6865	0	0	0	0	0		7.64268
Arl1	8.359e-16	2.301e-14	7.6575	7.6242	7.5251	7.6184	7.782	0	0	0	0	0		7.64144
Cwc15	1.279e-10	2.575e-10	8.3456	7.5353	7.2715	7.4578	7.582	0	0	0	0	0		7.63844
Rnf123	1.259e-13	9.962e-13	7.3811	7.6872	7.6213	7.6323	7.8648	0	0	0	0	0		7.63734
Rbsn	1.912e-14	2.202e-13	7.5006	7.6991	7.8183	7.6625	7.499	0	0	0	0	0		7.6359
Mrps2	1.556e-14	1.917e-13	7.8099	7.4959	7.6668	7.5054	7.6935	0	0	0	0	0		7.6343
Cryzl2	1.129e-14	1.484e-13	7.5507	7.7695	7.7428	7.6431	7.4652	0	0	0	0	0		7.63426
Zyx	1.259e-06	1.404e-06	9.6505	10.059	10.035	10.111	8.9504	2.7442	0	3.0356	2.7225	2.1375		7.63322
Tmem63b	1.421e-10	2.819e-10	7.7462	7.3558	7.2546	7.5054	8.3033	0	0	0	0	0		7.63306
Tmx3	1.972e-10	3.75e-10	7.4017	7.4338	7.4246	7.4684	8.4034	0	0	0	0	0		7.62638
Eif3g	6.174e-10	1.016e-09	11.709	11.126	11.121	11.138	10.448	3.3219	3.5729	3.3219	3.3505	3.848		7.62536
Dnajc11	6.372e-10	1.045e-09	10.289	10.129	10.199	10.123	10.712	2.8875	3.2928	2.1375	2.5607	2.4594		7.62282
Mtmr7	1.641e-13	1.211e-12	7.6286	7.4068	7.6081	7.5645	7.9015	0	0	0	0	0		7.6219
Ppm1k	3.301e-11	8.226e-11	7.8948	7.929	7.6184	7.6044	7.0618	0	0	0	0	0		7.62168
Rad23a	3.505e-10	6.175e-10	10.961	11.05	11.185	11.118	10.442	3.4725	3.2928	3.7549	3.3646	2.7655		7.62114
Plcd1	6.489e-15	1.019e-13	7.4619	7.7918	7.594	7.5932	7.6532	0	0	0	0	0		7.61882
Ube2g1	7.854e-12	2.573e-11	7.7886	7.7197	7.6668	7.8086	7.1096	0	0	0	0	0		7.61866
Syt17	1.832e-13	1.308e-12	7.6402	7.6221	7.6066	7.866	7.3549	0	0	0	0	0		7.61796
Gatm	2.449e-11	6.464e-11	7.4017	7.9932	7.6611	7.8592	7.1709	0	0	0	0	0		7.61722
Cstf1	2.167e-08	2.718e-08	7.719	8.1148	7.9744	8.0323	6.2346	0	0	0	0	0		7.61502
As3mt	3.937e-12	1.474e-11	7.8354	7.7609	7.6081	7.7074	7.1629	0	0	0	0	0		7.61494
Smarca5	3.97e-12	1.483e-11	8.0422	7.633	7.4553	7.5322	7.354	0	0	0	0	0		7.60334
Dock10	2.673e-10	4.879e-10	7.5691	7.2479	7.5149	7.3102	8.372	0	0	0	0	0		7.60282
Thoc3	1.34e-11	3.976e-11	7.6169	7.7996	7.7542	7.7787	7.0639	0	0	0	0	0		7.60266
Mrps18b	2.064e-11	5.625e-11	7.5507	7.7662	7.7279	7.893	7.0575	0	0	0	0	0		7.59906
Smndc1	3.531e-11	8.697e-11	7.4355	7.9117	7.7129	7.8636	7.0693	0	0	0	0	0		7.5986
Gipc1	3.822e-08	4.674e-08	8.1923	8.1824	7.6949	8.2075	7.3654	0	0	0	1.6781	0		7.59288
Smarce1	1.536e-10	3.016e-10	7.7886	7.8048	7.7218	7.7715	6.8367	0	0	0	0	0		7.58468
Jph4	4.919e-10	8.329e-10	7.3246	8.1059	7.6823	7.9171	6.89	0	0	0	0	0		7.58398
Igsf21	1.04e-14	1.414e-13	7.6169	7.4782	7.5204	7.5125	7.7892	0	0	0	0	0		7.58344
Sdr39u1	9.87e-12	3.099e-11	8.0509	7.5804	7.4279	7.6029	7.2517	0	0	0	0	0		7.58276
Nkiras1	3.576e-12	1.36e-11	7.5752	7.8623	7.6653	7.6511	7.1538	0	0	0	0	0		7.58154
Jam2	1.965e-10	3.738e-10	6.8099	7.7245	7.8183	7.7951	7.7542	0	0	0	0	0		7.5804
Ube2r2	4.662e-11	1.091e-10	7.7025	7.8329	7.5554	7.8411	6.9692	0	0	0	0	0		7.58022
Nbas	5.493e-13	3.108e-12	7.611	7.7951	7.5789	7.6689	7.2394	0	0	0	0	0		7.57866
Phlda1	5.542e-11	1.26e-10	8.0112	7.6021	7.6199	7.6646	6.9898	0	0	0	0	0		7.57752
Itga1	2.117e-10	3.986e-10	7.6802	7.8486	7.7556	7.7912	6.8035	0	0	0	0	0		7.57582
Tpp1	1.7e-11	4.81e-11	7.7569	7.4545	7.2085	7.4263	8.0218	0	0	0	0	0		7.5736
Cpeb3	5.014e-13	2.919e-12	7.7025	7.4068	7.4043	7.866	7.4822	0	0	0	0	0		7.57236
Gprasp1	5.685e-12	1.994e-11	7.339	7.9027	7.6872	7.6893	7.2317	0	0	0	0	0		7.56998
Synrg	2.012e-12	8.696e-12	12.386	12.114	12.323	12.228	12.261	4.3923	4.9635	4.6496	4.843	4.6147		7.56978
Fam120c	1.688e-11	4.792e-11	7.7354	7.3183	7.4421	7.3047	8.0444	0	0	0	0	0		7.56898
Ppp1r3g	2.436e-11	6.438e-11	7.8151	7.8125	7.4765	7.6956	7.0246	0	0	0	0	0		7.56486
Tmem33	2.048e-12	8.816e-12	7.4943	7.5102	7.3056	7.5407	7.9664	0	0	0	0	0		7.56344
Rab23	7.472e-10	1.206e-09	10.315	10.177	9.8803	10.017	10.363	2.0356	3.0875	2.2016	2.6323	3		7.55906
Actb	4.442e-07	5.039e-07	9.6402	9.6383	9.7098	9.5868	9.107	0	2.3785	2.2327	2.585	2.7004		7.5571
2610301B20Rik	8.805e-16	2.375e-14	7.646	7.4846	7.4496	7.5484	7.6532	0	0	0	0	0		7.55636
Araf	1.363e-09	2.073e-09	8.1844	7.7951	7.5046	7.6073	6.6893	0	0	0	0	0		7.55614
Txndc9	1.739e-13	1.261e-12	7.6858	7.7025	7.6308	7.4733	7.2789	0	0	0	0	0		7.55426
Slc4a1	3.158e-17	2.385e-15	7.4814	7.5446	7.5706	7.6323	7.4959	0	0	0	0	0		7.54496
Agpat3	8.911e-10	1.413e-09	7.5569	7.1957	7.4586	7.0928	8.4098	0	0	0	0	0		7.54276
Abcb1b	4.427e-12	1.616e-11	7.7245	7.4212	7.3602	7.2845	7.9141	0	0	0	0	0		7.5409
Nrip2	2.171e-11	5.873e-11	7.7728	7.6858	7.5118	7.7401	6.9841	0	0	0	0	0		7.53892
Tusc3	1.363e-11	4.038e-11	7.5384	7.4627	7.3092	7.3219	8.0612	0	0	0	0	0		7.53868
Uqcc2	1.42e-10	2.819e-10	7.9331	7.9159	7.499	7.4102	6.9343	0	0	0	0	0		7.5385
Vps28	7.497e-12	2.482e-11	7.6228	7.7708	7.6162	7.6388	7.04	0	0	0	0	0		7.53772
Eftud2	6.683e-11	1.474e-10	10.506	10.821	10.614	10.767	10.26	3.1859	3.433	2.6088	3	3.0531		7.53744
Cdh10	7.264e-12	2.432e-11	7.6575	7.2317	7.5078	7.3291	7.9507	0	0	0	0	0		7.53536
Snx18	8.965e-13	4.534e-12	7.7025	7.7177	7.5306	7.5454	7.1749	0	0	0	0	0		7.53422
Jakmip2	1.244e-13	9.949e-13	7.2649	7.7149	7.5592	7.6323	7.499	0	0	0	0	0		7.53406
Polr2e	2.384e-09	3.467e-09	8.5507	7.1859	7.5094	7.3083	7.1137	0	0	0	0	0		7.5336
Champ1	1.16e-13	9.399e-13	7.339	7.5782	7.3837	7.7462	7.6177	0	0	0	0	0		7.53296
Ccdc85a	4.4e-15	7.725e-14	7.6632	7.3619	7.5267	7.511	7.5947	0	0	0	0	0		7.5315
Synrg	2.297e-12	9.635e-12	12.353	12.065	12.283	12.178	12.239	4.3923	4.9635	4.6496	4.843	4.6147		7.53098
Jup	2.187e-10	4.092e-10	7.8851	7.6611	7.0345	7.1043	7.9629	0	0	0	0	0		7.52958
Git2	2.118e-10	3.986e-10	7.7245	7.9045	7.5165	7.6823	6.7892	0	0	0	0	0		7.5234
Nup205	1.239e-11	3.728e-11	7.029	7.4959	7.6795	7.5645	7.8342	0	0	0	0	0		7.52062
Nf2	1.76e-11	4.948e-11	7.5872	7.7529	7.5638	7.7163	6.9704	0	0	0	0	0		7.51812
Armc8	1.51e-15	3.456e-14	7.5446	7.5078	7.3776	7.507	7.6518	0	0	0	0	0		7.51776
Rpa1	4.279e-14	4.259e-13	7.73	7.4822	7.4586	7.3309	7.5827	0	0	0	0	0		7.51688
Add3	8.941e-11	1.881e-10	11.766	11.42	11.394	11.239	11.546	4.1859	4.3646	3.8278	3.9069	3.4983		7.5163
Chid1	7.274e-13	3.841e-12	7.7354	7.5022	7.4077	7.2269	7.708	0	0	0	0	0		7.51604
Sdhaf4	2.341e-13	1.599e-12	7.719	7.6788	7.3966	7.4975	7.2845	0	0	0	0	0		7.51528
Map3k5	9.868e-14	8.226e-13	7.5133	7.354	7.4	7.5259	7.78	0	0	0	0	0		7.51464
Gsta4	8.315e-11	1.768e-10	11.461	11.53	11.554	11.709	11.184	4.0531	3.406	4.1619	3.991	4.2555		7.5141
Sumo1	4.518e-13	2.674e-12	7.6858	7.6184	7.1977	7.6264	7.4305	0	0	0	0	0		7.51176
Adprhl2	3.18e-12	1.242e-11	7.563	7.7787	7.3966	7.6795	7.1303	0	0	0	0	0		7.50962
Ppa1	5.303e-10	8.88e-10	7.7938	6.9853	7.2817	7.2555	8.1933	0	0	0	0	0		7.50192
Sdf2	1.693e-12	7.606e-12	7.708	7.452	7.6532	7.5744	7.1158	0	0	0	0	0		7.50068
Pgm2l1	2.723e-10	4.942e-10	12.452	12.179	12.383	12.262	13.153	5.0875	4.843	4.6781	5.1375	5.1938		7.49782
Osbpl10	5.694e-12	1.996e-11	7.8555	7.5157	7.1117	7.6044	7.3889	0	0	0	0	0		7.49524
Vps26a	1.073e-08	1.403e-08	7.611	6.9484	7.1137	7.1221	8.6805	0	0	0	0	0		7.49514
Ado	3.737e-12	1.414e-11	7.3246	7.6907	7.6103	7.7129	7.1179	0	0	0	0	0		7.49128
Lama4	4.078e-15	7.42e-14	7.6402	7.4822	7.4313	7.5423	7.3478	0	0	0	0	0		7.48876
Ssb	1.168e-09	1.802e-09	11.534	11.657	11.573	11.529	11.475	3.2172	4	4.3147	4.1619	4.6381		7.48722
Cacna1c	2.469e-14	2.674e-13	7.4814	7.3345	7.6575	7.3707	7.5917	0	0	0	0	0		7.48716
Tbrg4	5.134e-12	1.834e-11	7.0112	7.5368	7.6431	7.5804	7.6611	0	0	0	0	0		7.48652
Mtdh	5.714e-13	3.203e-12	7.5006	7.7529	7.3681	7.5744	7.2114	0	0	0	0	0		7.48148
Kbtbd2	5.387e-10	9.01e-10	8.1804	7.6872	7.2527	7.394	6.8924	0	0	0	0	0		7.48134
Mrpl2	4.066e-10	7.042e-10	6.9932	7.8348	7.7642	7.8605	6.946	0	0	0	0	0		7.47974
Ciao1	2.359e-11	6.288e-11	7.5752	7.6561	7.4902	7.7435	6.9165	0	0	0	0	0		7.4763
Robo1	8.564e-14	7.444e-13	7.3531	7.5157	7.6294	7.6169	7.2649	0	0	0	0	0		7.476
Mrpl13	2.203e-09	3.218e-09	7.5752	7.9875	7.5872	7.7401	6.4854	0	0	0	0	0		7.47508
Usp24	4.282e-15	7.671e-14	7.302	7.563	7.4446	7.4782	7.5789	0	0	0	0	0		7.47334
F8a	4.038e-13	2.436e-12	7.3318	7.3733	7.4822	7.3681	7.8093	0	0	0	0	0		7.47294
Glipr2	1.069e-10	2.198e-10	7.3742	7.8373	7.594	7.7204	6.8367	0	0	0	0	0		7.47252
Snrpb2	5.608e-15	9.177e-14	7.563	7.4998	7.4221	7.2983	7.5774	0	0	0	0	0		7.47212
Lsm3	1.891e-11	5.229e-11	7.697	7.7728	7.3584	7.5484	6.9784	0	0	0	0	0		7.471
Lrrc40	2.128e-10	3.999e-10	7.4288	7.9692	7.3255	7.7715	6.8555	0	0	0	0	0		7.4701
Trp53i11	2.707e-10	4.925e-10	7.302	7.1568	7.3776	7.2555	8.2479	0	0	0	0	0		7.46796
Enpp4	4.464e-09	6.179e-09	8.5196	7.3923	7.3567	7.2517	6.8189	0	0	0	0	0		7.46784
Prune2	7.082e-11	1.547e-10	7.611	7.4846	6.9425	7.3309	7.9635	0	0	0	0	0		7.4665
Fer	7.693e-11	1.656e-10	7.3531	7.8685	7.5492	7.6781	6.8777	0	0	0	0	0		7.46532
Lima1	1.201e-10	2.44e-10	7.6575	7.8467	7.3889	7.6213	6.8112	0	0	0	0	0		7.46512
Recql4	4.28e-11	1.019e-10	7.6689	7.6575	7.676	7.4388	6.8567	0	0	0	0	0		7.45958
Cpe	5.833e-13	3.245e-12	11.492	11.66	11.777	11.72	11.515	4.3992	3.9819	4.1043	4.1127	4.2705		7.45908
Ndufaf1	5.058e-13	2.938e-12	7.2346	7.3794	7.3602	7.5661	7.7495	0	0	0	0	0		7.45796
Asph	3.007e-13	1.94e-12	7.3742	7.347	7.4279	7.3478	7.7899	0	0	0	0	0		7.45736
Clvs1	6.974e-13	3.73e-12	7.4814	7.784	7.2612	7.4717	7.2845	0	0	0	0	0		7.45656
C1ql3	6.083e-14	5.772e-13	7.4288	7.394	7.6575	7.5243	7.2422	0	0	0	0	0		7.44936
Syngr1	3.033e-11	7.688e-11	7.6632	7.5484	6.9658	7.2593	7.8041	0	0	0	0	0		7.44816
Brcc3	1.709e-11	4.831e-11	7.3742	7.6668	7.7515	7.487	6.9542	0	0	0	0	0		7.44674
Trim46	1.301e-13	1.017e-12	7.2649	7.4421	7.3872	7.4009	7.7231	0	0	0	0	0		7.44364
Specc1l	3.772e-11	9.175e-11	7.5446	7.5538	7.6132	7.6717	6.8329	0	0	0	0	0		7.44324
Abhd17b	1.403e-13	1.073e-12	7.3461	7.6539	7.2384	7.3846	7.5774	0	0	0	0	0		7.44008
Snx16	2.788e-12	1.119e-11	7.3531	7.611	7.3487	7.7616	7.1252	0	0	0	0	0		7.43992
Ylpm1	1.468e-08	1.883e-08	10.008	10.349	10.364	10.324	9.8992	3.406	3.0179	3.0356	2.7225	1.585		7.43544
Tcf20	1.383e-12	6.422e-12	7.6228	7.5484	7.4043	7.511	7.0444	0	0	0	0	0		7.42618
Nrbf2	4.764e-14	4.671e-13	7.2192	7.4111	7.4943	7.6235	7.3768	0	0	0	0	0		7.42498
Usp32	7.577e-12	2.502e-11	7.7408	7.1739	7.1809	7.3138	7.7115	0	0	0	0	0		7.42418
Dab1	3.934e-12	1.474e-11	7.3165	7.5407	7.5638	7.6745	7.0224	0	0	0	0	0		7.42358
Vamp7	5.379e-13	3.063e-12	7.7408	7.438	7.1878	7.4085	7.3416	0	0	0	0	0		7.42334
Gabra4	1.833e-12	8.092e-12	7.0811	7.7163	7.3291	7.5006	7.4878	0	0	0	0	0		7.42298
Wbp4	1.011e-10	2.096e-10	7.4749	7.8924	7.3663	7.5584	6.8215	0	0	0	0	0		7.4227
Prodh	2.046e-13	1.431e-12	7.3165	7.466	7.4043	7.2269	7.6991	0	0	0	0	0		7.42256
Fxr2	1.463e-08	1.878e-08	7.3246	8.2882	7.3794	7.7814	6.3129	0	0	0	0	0		7.4173
Ctnnbl1	2.396e-10	4.421e-10	7.6286	7.0639	7.3038	7.019	8.058	0	0	0	0	0		7.41466
Gprin1	3.16e-11	7.928e-11	14.607	14.194	14.36	14.274	14.773	7.3129	7.1749	6.6991	7.0056	6.9425		7.4146
Cpne7	1.813e-12	8.039e-12	7.1799	7.4765	7.5507	7.6928	7.1579	0	0	0	0	0		7.41156
Uck1	6.917e-13	3.711e-12	7.5259	7.5744	7.4153	7.4717	7.0509	0	0	0	0	0		7.40764
Emc7	1.523e-09	2.295e-09	7.4619	8.0168	7.2085	7.7515	6.594	0	0	0	0	0		7.40654
Ythdc2	7.763e-11	1.669e-10	8.0639	7.2761	7.3452	7.1579	7.1829	0	0	0	0	0		7.4052
Ssb	1.295e-09	1.976e-09	11.426	11.576	11.509	11.451	11.387	3.2172	4	4.3147	4.1619	4.6381		7.40342
Slc25a46	1.048e-11	3.253e-11	7.3461	7.3897	7.0157	7.3872	7.8361	0	0	0	0	0		7.39496
Eps8l2	1.366e-08	1.763e-08	7.1477	8.2374	7.5789	7.6984	6.3111	0	0	0	0	0		7.3947
Grsf1	1.609e-11	4.616e-11	7.5992	7.5857	7.3549	7.56	6.8728	0	0	0	0	0		7.39452
Naca	1.672e-09	2.501e-09	11.62	10.729	10.787	10.72	11.752	3.7442	3.7761	4	3.4854	3.6323		7.394
Eef1akmt2	7.463e-15	1.117e-13	7.1878	7.4296	7.4221	7.487	7.4429	0	0	0	0	0		7.39388
Kcnj3	8.972e-10	1.422e-09	7.2036	7.9864	7.4586	7.6781	6.6395	0	0	0	0	0		7.39324
Rpl7a	1.269e-12	5.993e-12	12.415	12.593	12.448	12.41	12.399	5.0875	5.3576	4.797	5.1169	4.9449		7.39222
Ephb2	3.796e-12	1.43e-11	7.7136	7.264	7.1457	7.2104	7.6169	0	0	0	0	0		7.39012
Mindy1	7.092e-15	1.077e-13	7.3246	7.5102	7.417	7.4684	7.2192	0	0	0	0	0		7.38788
NOGENE	4.202e-14	4.198e-13	7.4553	7.5947	7.2046	7.3461	7.3354	0	0	0	0	0		7.38722
Nhp2	3.07e-11	7.758e-11	7.7781	7.4806	7.2489	7.5322	6.8936	0	0	0	0	0		7.38668
Cope	1.91e-07	2.218e-07	8.8799	9.2213	9.1462	9.23	8.8514	1.6781	0	2.2327	2.4854	2.0356		7.3794
Grn	9.025e-13	4.556e-12	7.73	7.4237	7.2422	7.1957	7.3001	0	0	0	0	0		7.37834
Eef1akmt1	5.143e-11	1.178e-10	7.2269	7.5744	7.6036	7.6646	6.8202	0	0	0	0	0		7.37794
Qtrt1	2.75e-10	4.986e-10	7.6914	7.6977	7.3872	7.4717	6.6294	0	0	0	0	0		7.37548
Ak5	1.386e-10	2.762e-10	12.374	12.26	12.289	12.372	11.757	4.8679	5.3219	4.5789	4.8679	4.5607		7.37094
Arid1a	4.697e-12	1.701e-11	7.3602	7.6453	7.3407	7.5086	6.9449	0	0	0	0	0		7.35994
Cnnm1	4.327e-11	1.026e-10	7.799	7.47	6.8642	7.2065	7.4454	0	0	0	0	0		7.35702
Dock7	1.948e-12	8.453e-12	7.5691	7.5484	7.2677	7.3872	6.9955	0	0	0	0	0		7.35358
Fkbp1a	4.352e-10	7.485e-10	11.954	11.505	11.777	11.75	12.669	4.7708	4.4919	4.585	4.6381	4.4128		7.35128
Osbpl9	1.341e-13	1.038e-12	7.1064	7.4254	7.5554	7.2808	7.3837	0	0	0	0	0		7.35034
Ubqln4	5.109e-13	2.958e-12	7.5507	7.1839	7.3156	7.5615	7.1396	0	0	0	0	0		7.35026
Rbm14	1.322e-12	6.182e-12	11.597	11.527	11.544	11.528	11.157	4.3219	4.1293	4.0179	3.9727	4.1619		7.34986
Tmem9b	4.485e-11	1.058e-10	7.2873	7.2336	7.1457	7.1189	7.96	0	0	0	0	0		7.3491
Asic1	8.751e-15	1.247e-13	7.1639	7.3514	7.457	7.3138	7.4487	0	0	0	0	0		7.34696
Tubgcp2	3.406e-11	8.452e-11	6.9189	7.6206	7.5984	7.5392	7.0411	0	0	0	0	0		7.34364
Akap9	5.355e-13	3.053e-12	7.2269	7.3837	7.3487	7.6446	7.1117	0	0	0	0	0		7.34312
Pcm1	2.348e-13	1.599e-12	7.1639	7.4886	7.3872	7.5275	7.1416	0	0	0	0	0		7.34176
Mrpl17	1.802e-11	5.033e-11	7.5006	7.6439	7.2798	7.4454	6.8379	0	0	0	0	0		7.34152
Sh3rf1	1.016e-10	2.103e-10	7.3742	7.7415	7.3983	7.4838	6.7018	0	0	0	0	0		7.33992
Usp8	3.024e-11	7.668e-11	7.4153	7.6575	7.3716	7.47	6.78	0	0	0	0	0		7.33888
Cc2d1b	1.309e-11	3.903e-11	7.5932	7.3381	7.3273	7.5683	6.8517	0	0	0	0	0		7.33572
Rdh13	1.112e-13	9.053e-13	7.1313	7.4561	7.4619	7.4438	7.1819	0	0	0	0	0		7.335
Fn3krp	2.06e-14	2.324e-13	10.861	10.673	10.734	10.678	10.737	3.5729	3.406	3.4195	3.3074	3.3074		7.33396
Gtf2e2	1.817e-09	2.7e-09	7.73	7.7872	7.2752	7.4594	6.4162	0	0	0	0	0		7.3336
Slitrk1	6.498e-15	1.019e-13	7.1396	7.4212	7.312	7.3724	7.4077	0	0	0	0	0		7.33058
Tecpr2	7.56e-12	2.499e-11	7.4553	7.5314	7.3192	7.487	6.853	0	0	0	0	0		7.32918
Srsf10	4.277e-10	7.362e-10	7.9331	7.5329	7.2451	7.2612	6.6724	0	0	0	0	0		7.32894
Ethe1	1.246e-10	2.514e-10	7.4487	7.5668	7.4603	7.5368	6.6279	0	0	0	0	0		7.3281
Tbcd	2.101e-11	5.703e-11	7.1957	7.1859	7.2026	7.1629	7.8918	0	0	0	0	0		7.32778
Phkb	2.31e-13	1.585e-12	7.5872	7.3837	7.2752	7.0949	7.2909	0	0	0	0	0		7.32638
Abcd3	5.195e-13	2.994e-12	7.4814	7.2826	7.0704	7.2269	7.5638	0	0	0	0	0		7.32502
Abi3	3.968e-12	1.483e-11	7.388	7.4806	7.3619	7.4854	6.8704	0	0	0	0	0		7.31726
K16	9.708e-07	1.087e-06	8.5721	6.3558	6.4676	6.433	8.7452	0	0	0	0	0		7.31474
Usp4	3.768e-15	6.986e-14	7.2946	7.3733	7.1385	7.4119	7.3531	0	0	0	0	0		7.31428
Snx14	8.165e-11	1.742e-10	7.0466	7.7482	7.4111	7.5368	6.8253	0	0	0	0	0		7.3136
Egln1	4.934e-10	8.35e-10	7.3246	7.7415	7.2873	7.6511	6.5531	0	0	0	0	0		7.31152
Bloc1s1	2.858e-11	7.357e-11	7.4619	7.708	7.224	7.3407	6.8215	0	0	0	0	0		7.31122
Nup155	2.181e-12	9.281e-12	7.5507	7.3602	6.9738	7.1669	7.4854	0	0	0	0	0		7.3074
Zfp326	8.006e-12	2.617e-11	7.4814	7.5835	7.1849	7.3975	6.8814	0	0	0	0	0		7.30574
Acan	1.173e-10	2.39e-10	7.4017	7.6823	7.1436	7.5842	6.7101	0	0	0	0	0		7.30438
Prrt3	2.358e-10	4.367e-10	7.4943	7.6539	7.1699	7.5804	6.6162	0	0	0	0	0		7.30294
Pdxdc1	1.196e-11	3.62e-11	7.1396	7.5275	7.3056	7.6154	6.8924	0	0	0	0	0		7.2961
Zc3h18	1.875e-11	5.2e-11	7.7245	7.3897	7.2489	7.2536	6.8629	0	0	0	0	0		7.29592
Nr3c1	1.265e-13	9.995e-13	7.2649	7.452	7.2798	7.4388	7.0433	0	0	0	0	0		7.29576
Rnf20	2.143e-10	4.023e-10	7.9612	7.1928	7.2696	7.2536	6.7944	0	0	0	0	0		7.29432
Ubap1	8.923e-09	1.177e-08	7.0201	7.8499	7.4077	7.9069	6.2761	0	0	0	0	0		7.29214
Stn1	3.048e-09	4.338e-09	6.9378	7.8936	7.6036	7.5661	6.4446	0	0	0	0	0		7.28914
Plxnc1	8.943e-16	2.375e-14	7.3461	7.3165	7.3716	7.263	7.1467	0	0	0	0	0		7.28878
Dhx29	1.684e-14	2.022e-13	7.4288	7.3228	7.224	7.0991	7.3611	0	0	0	0	0		7.28716
Trmt11	1.073e-11	3.304e-11	7.1799	7.6184	7.3407	7.4371	6.8555	0	0	0	0	0		7.28632
Lyrm2	2.073e-10	3.915e-10	7.0466	7.5804	7.5454	7.5661	6.6467	0	0	0	0	0		7.27704
Agpat4	9.411e-10	1.487e-09	7.2946	6.96	7.4043	6.6907	8.0251	0	0	0	0	0		7.27494
Ccdc50	2.397e-09	3.483e-09	8.0596	7.47	7.1344	7.2104	6.4919	0	0	0	0	0		7.27326
Krt14	1.457e-06	1.621e-06	9.113	6.4838	6.4951	6.1375	8.1303	0	0	0	0	0		7.27194
Htatip2	7.408e-09	9.884e-09	6.9472	7.8125	7.4927	7.8157	6.2854	0	0	0	0	0		7.2707
Ahcy	5.999e-11	1.345e-10	10.723	10.769	10.687	10.708	10.848	3.7004	3.6893	3.3219	2.926	3.7442		7.27064
Yme1l1	2.314e-12	9.681e-12	7.4017	7.4959	7.1957	7.3611	6.8912	0	0	0	0	0		7.26912
Hmgl6	7.484e-08	8.945e-08	8.0853	7.7562	7.3434	7.3576	5.797	0	0	0	0	0		7.2679
Gna13	1.237e-10	2.499e-10	10.383	10.109	10.29	10.229	10.668	3.0875	3.1699	2.585	3	3.4983		7.26766
Lamb1	4.602e-12	1.672e-11	7.1477	7.4438	7.4463	7.4313	6.8629	0	0	0	0	0		7.2664
Chtf8	1.696e-09	2.532e-09	7.4288	7.6539	7.2649	7.6337	6.3345	0	0	0	0	0		7.26316
Cadm1	3.355e-08	4.128e-08	10.22	10.076	9.7359	9.8561	10.547	1.848	2.433	3.6554	2.8074	3.3785		7.26254
Lpp	1.116e-11	3.419e-11	7.6745	6.9224	7.4111	7.1819	7.121	0	0	0	0	0		7.26218
Eml2	3.357e-14	3.465e-13	7.339	7.0747	7.2384	7.2085	7.4454	0	0	0	0	0		7.2612
Akap10	1.646e-11	4.699e-11	7.1957	7.5484	7.4077	7.3794	6.7655	0	0	0	0	0		7.25934
Prkcg	1.389e-10	2.767e-10	12.859	12.919	13.224	13.163	13.44	5.9069	5.5361	5.5577	6.0378	6.278		7.2577
Zadh2	4.499e-11	1.061e-10	7.1878	7.5615	7.3966	7.4496	6.6921	0	0	0	0	0		7.25752
Magi1	6.942e-11	1.522e-10	10.354	10.386	10.263	10.379	9.8956	3.0179	3.4594	2.9819	2.6323	2.9069		7.25584
Slc1a1	1.145e-10	2.339e-10	7.0023	7.2919	6.9784	7.0843	7.9081	0	0	0	0	0		7.253
Cntn3	2.649e-12	1.076e-11	7.3602	7.4806	7.1477	7.3872	6.879	0	0	0	0	0		7.25094
Smarca2	5.272e-15	8.85e-14	7.1064	7.3452	7.1548	7.3237	7.3192	0	0	0	0	0		7.24986
Chd5	1.942e-12	8.438e-12	7.2873	7.5196	7.1365	7.3846	6.9189	0	0	0	0	0		7.24938
Cldn10	8.501e-12	2.761e-11	6.9565	7.5022	6.9977	7.5615	7.2288	0	0	0	0	0		7.24934
Stx17	3.426e-11	8.494e-11	7.2649	7.563	7.3001	7.4246	6.6935	0	0	0	0	0		7.24922
Herc4	5.971e-11	1.34e-10	7.8405	7.2965	7.08	7.0991	6.9272	0	0	0	0	0		7.24866
Eif4enif1	6.822e-10	1.11e-09	7.4749	7.5461	7.3584	7.4627	6.3906	0	0	0	0	0		7.24654
Mboat7	7.66e-10	1.233e-09	7.5384	7.1106	6.9449	6.7004	7.9307	0	0	0	0	0		7.245
Rasgrp1	8.049e-13	4.183e-12	6.9841	7.4504	7.417	7.2909	7.0715	0	0	0	0	0		7.24278
Cox14	4.852e-14	4.746e-13	7.0725	7.4586	7.2873	7.1558	7.2346	0	0	0	0	0		7.24176
Sh3bp1	5.556e-13	3.137e-12	7.0896	7.3425	7.4838	7.2909	6.9921	0	0	0	0	0		7.23978
Mocs2	4.977e-11	1.146e-10	7.0201	7.4998	7.3434	7.5759	6.7469	0	0	0	0	0		7.23722
mKIAA0684	1.982e-12	8.578e-12	7.1148	7.3733	7.4094	7.3992	6.8826	0	0	0	0	0		7.23586
Poldip3	1.186e-08	1.542e-08	9.7124	9.9021	9.4981	9.6807	8.4688	1.7655	2.585	2.2327	2.6323	1.8875		7.23182
Iglon5	5.12e-10	8.623e-10	7.4288	6.8379	6.9932	6.9378	7.9583	0	0	0	0	0		7.2312
Smarcd2	2.264e-10	4.213e-10	6.7361	7.633	7.5353	7.4279	6.8227	0	0	0	0	0		7.231
Susd5	1.001e-10	2.081e-10	7.3092	7.029	6.8741	7.0906	7.8474	0	0	0	0	0		7.23006
Fuom	3.473e-11	8.586e-11	7.1313	7.5668	7.3923	7.3496	6.7046	0	0	0	0	0		7.22892
Tex2	8.403e-14	7.341e-13	7.2036	7.4782	7.1699	7.2046	7.0542	0	0	0	0	0		7.2221
Rb1cc1	1.411e-13	1.076e-12	7.098	7.417	7.1918	7.3628	7.0312	0	0	0	0	0		7.22016
Hectd3	9.86e-15	1.361e-13	7.2798	7.3381	7.0224	7.225	7.2336	0	0	0	0	0		7.21978
Il1rap	3.893e-13	2.381e-12	7.4619	7.2574	6.9425	7.1609	7.2649	0	0	0	0	0		7.21752
Mff	1.364e-09	2.074e-09	8.0553	7.0906	6.7455	6.8392	7.3549	0	0	0	0	0		7.2171
Sdk1	1.048e-14	1.42e-13	7.0466	7.382	7.1829	7.2104	7.2327	0	0	0	0	0		7.21092
D3Ertd751e	1.228e-11	3.701e-11	6.8605	7.246	7.5236	7.4471	6.9669	0	0	0	0	0		7.20882
Stam	2.272e-11	6.095e-11	11.352	11.203	11.147	11.214	11.294	4.3505	4.2095	4.0444	3.5484	4.0179		7.20786
Phox2b	2.04e-10	3.862e-10	7.563	7.4026	7.1639	7.394	6.5141	0	0	0	0	0		7.20752
Aftph	1.44e-13	1.09e-12	7.4619	7.2172	7.0279	7.2336	7.0938	0	0	0	0	0		7.20688
Akap8	7.616e-12	2.509e-11	7.3246	7.3558	7.1436	7.4454	6.7576	0	0	0	0	0		7.2054
Vamp4	5.231e-13	3.005e-12	7.2724	7.4195	7.2649	7.1649	6.8936	0	0	0	0	0		7.20306
Pgp	6.701e-09	9.007e-09	11.515	11.628	11.565	11.661	11.237	4.3992	3.2327	4.6781	4.6668	4.6206		7.20172
Gcat	1.825e-09	2.711e-09	7.4355	7.6242	7.0725	7.5645	6.3074	0	0	0	0	0		7.20082
Hsdl1	3.836e-11	9.297e-11	6.7142	7.3966	7.0279	7.2649	7.5721	0	0	0	0	0		7.19514
Slc35a4	6.672e-09	8.973e-09	6.9932	7.9087	7.278	7.5661	6.225	0	0	0	0	0		7.1942
Amot	1.148e-11	3.49e-11	7.0466	7.4212	7.4782	7.2432	6.7774	0	0	0	0	0		7.19332
Irs2	6.054e-09	8.208e-09	7.2269	7.7807	7.3273	7.5006	6.1272	0	0	0	0	0		7.19254
U2surp	1.618e-11	4.631e-11	7.3602	7.2873	6.7918	6.9715	7.5283	0	0	0	0	0		7.18782
Stxbp3	6.796e-14	6.29e-13	7.388	7.1293	6.9761	7.2007	7.2403	0	0	0	0	0		7.18688
Gpatch8	4.597e-11	1.079e-10	7.2114	7.4886	7.3318	7.2808	6.5999	0	0	0	0	0		7.1825
Ubac1	4.877e-13	2.851e-12	7.029	7.2965	7.1977	7.4279	6.9542	0	0	0	0	0		7.18106
mKIAA1042	7.38e-13	3.889e-12	7.4943	7.1609	7.0179	7.2336	6.9875	0	0	0	0	0		7.17884
Palmd	4.271e-07	4.853e-07	9.0941	6.6235	6.953	6.732	6.4886	0	0	0	0	0		7.17824
Cntnap4	2.264e-09	3.304e-09	7.9977	7.2687	7.1938	6.9715	6.4594	0	0	0	0	0		7.17822
Psmc5	3.771e-12	1.424e-11	12.125	12.103	11.892	12.038	11.815	4.9727	4.5789	4.8329	4.6381	5.0661		7.17686
Ubxn7	5.093e-10	8.591e-10	7.0725	7.6872	7.2677	7.3992	6.4545	0	0	0	0	0		7.17622
Krt1	1.562e-07	1.824e-07	12.648	12.009	11.138	10.808	12.969	4.8679	4.9069	4.8022	4.4396	4.6949		7.1721
Mocs1	4.953e-14	4.812e-13	7.098	7.3496	7.2836	7.1221	6.9932	0	0	0	0	0		7.1693
Wwp1	3.498e-12	1.34e-11	7.4553	7.321	7.0564	7.1819	6.8151	0	0	0	0	0		7.16594
Chrm4	3.91e-12	1.466e-11	6.9841	7.5461	6.9658	7.2873	7.0334	0	0	0	0	0		7.16334
Ndufa3	1.914e-09	2.827e-09	10.431	10.713	10.444	10.864	10.306	3.2016	3.511	3.278	2.8074	4.1457		7.16286
Akt1s1	2.725e-09	3.917e-09	7.1064	7.7774	7.2403	7.4313	6.2498	0	0	0	0	0		7.16104
Insrr	1.533e-09	2.309e-09	8.0596	6.9989	6.7401	6.8342	7.1679	0	0	0	0	0		7.16014
Prpf4b	2.351e-13	1.599e-12	6.9093	7.301	7.2221	7.3174	7.0498	0	0	0	0	0		7.15992
ND2	1.04e-10	2.145e-10	7.6632	6.7184	6.8875	7.1436	7.3724	0	0	0	0	0		7.15702
Eci2	2.518e-11	6.614e-11	9.9341	10.23	10.002	10.154	9.6178	2.7225	2.9449	2.585	2.7866	3.121		7.15558
Hddc3	1.705e-10	3.31e-10	6.8304	7.5157	7.2854	7.5006	6.6352	0	0	0	0	0		7.15346
Cyb5r1	3.244e-10	5.782e-10	7.0553	6.6696	7.1548	7.029	7.8574	0	0	0	0	0		7.15322
Adcy2	1.991e-12	8.611e-12	7.0378	7.246	6.853	7.1609	7.4668	0	0	0	0	0		7.1529
Cmtm5	4.642e-10	7.913e-10	7.4421	6.9761	6.7482	6.7931	7.799	0	0	0	0	0		7.1517
Mrpl44	8.085e-13	4.193e-12	7.339	6.9331	7.08	7.0079	7.3949	0	0	0	0	0		7.15098
Txlna	4.734e-12	1.712e-11	7.4749	7.2546	7.0279	7.1987	6.7931	0	0	0	0	0		7.14984
Dusp28	1.588e-12	7.193e-12	6.9658	7.4094	6.9853	7.3759	7.0112	0	0	0	0	0		7.14952
Parp3	1.804e-10	3.471e-10	7.1064	7.4338	7.2649	7.4668	6.4757	0	0	0	0	0		7.14952
Rpn1	3.488e-13	2.186e-12	12.271	12.192	12.323	12.219	12.29	5.2211	5.3001	4.9355	4.9117	5.1898		7.14736
Slc16a7	1.774e-10	3.424e-10	7.5507	6.9284	6.7279	6.9224	7.6059	0	0	0	0	0		7.14706
Kcna4	7.587e-11	1.639e-10	6.7469	7.6073	6.9807	7.4405	6.9542	0	0	0	0	0		7.14592
Ldhd	3.152e-10	5.631e-10	7.7462	7.3663	7.0101	6.9977	6.5999	0	0	0	0	0		7.14404
Nup93	5.11e-13	2.958e-12	7.3742	7.312	6.953	7.1106	6.9692	0	0	0	0	0		7.1438
Tbc1d23	7.341e-14	6.655e-13	6.9284	7.2965	7.2422	7.2026	7.0488	0	0	0	0	0		7.1437
Pxn	4.835e-11	1.12e-10	7.1396	7.417	7.1497	7.4229	6.5835	0	0	0	0	0		7.14254
Nup37	5.64e-13	3.172e-12	6.89	7.2873	7.1252	7.3776	7.0301	0	0	0	0	0		7.14204
Fam172a	2.935e-11	7.519e-11	7.388	7.4943	7.0466	7.1043	6.6767	0	0	0	0	0		7.14198
Hars	2.652e-14	2.837e-13	10.967	10.988	11.101	11.055	11.112	3.8074	3.9449	3.7655	3.9449	4.0531		7.14144
Clec2l	1.784e-12	7.961e-12	6.9284	6.9738	7.1231	7.1749	7.5006	0	0	0	0	0		7.14016
Gys1	2.606e-13	1.736e-12	7.098	7.04	7.1957	7.4102	6.9449	0	0	0	0	0		7.13776
Cabp1	4.351e-07	4.939e-07	8.8019	7.3966	6.6795	6.9272	5.8802	0	0	0	0	0		7.13708
Dock3	1.443e-13	1.091e-12	7.1064	7.2715	6.9577	7.0079	7.339	0	0	0	0	0		7.1365
Ift74	2.101e-09	3.08e-09	7.0639	7.7662	7.1898	7.3742	6.2761	0	0	0	0	0		7.13404
1700037H04Rik	4.384e-13	2.612e-12	7.1148	7.3983	6.8642	7.1457	7.1457	0	0	0	0	0		7.13374
Lypla2	6.601e-10	1.079e-09	10.877	11.095	11.137	11.135	10.816	3.2172	4.4396	3.9069	3.7866	4.079		7.12614
Tsc22d2	2.567e-10	4.711e-10	7.1064	7.5353	7.1769	7.3707	6.4363	0	0	0	0	0		7.12512
Rabgef1	2.747e-11	7.128e-11	7.4017	7.2798	7.1169	7.2355	6.5865	0	0	0	0	0		7.12408
Mia3	5.963e-12	2.076e-11	6.6582	7.2845	7.2346	7.1878	7.2489	0	0	0	0	0		7.1228
Magohb	1.648e-13	1.214e-12	7.0896	7.2891	7.0564	7.2845	6.8936	0	0	0	0	0		7.12264
Ndufb7	2.663e-09	3.833e-09	10.04	10.026	9.7003	9.9148	9.7782	3.511	3.0179	2.0704	2.4854	2.7655		7.12182
Sh3pxd2a	2.688e-10	4.897e-10	7.2422	7.4094	7.3174	7.2649	6.375	0	0	0	0	0		7.12178
Ncbp2	2.84e-12	1.134e-11	7.0378	7.4212	7.1639	7.2124	6.7735	0	0	0	0	0		7.12176
Gucy1b1	3.899e-13	2.381e-12	7.0811	7.1957	6.8851	7.0477	7.3863	0	0	0	0	0		7.11918
Fermt2	2.409e-10	4.442e-10	6.8505	7.5133	7.4296	7.2269	6.522	0	0	0	0	0		7.10846
Cav1	9.162e-12	2.93e-11	6.9093	6.9009	7.1609	6.9864	7.56	0	0	0	0	0		7.1035
Rsf1	1.228e-10	2.485e-10	7.2946	7.394	7.1809	7.2085	6.4363	0	0	0	0	0		7.10286
Plcb3	3.678e-14	3.774e-13	6.9841	6.9623	7.1977	7.079	7.2845	0	0	0	0	0		7.10152
Gabra5	1.361e-09	2.07e-09	7.098	7.6893	6.9681	7.4195	6.3255	0	0	0	0	0		7.10008
Sike1	2.949e-11	7.54e-11	7.0639	7.2621	7.1609	7.4229	6.5789	0	0	0	0	0		7.09774
Apba2	5.317e-10	8.9e-10	7.6518	7.3584	6.9224	7.1169	6.438	0	0	0	0	0		7.0975
Pla2g7	1.687e-16	7.621e-15	7.1313	7.1957	7.0488	7.04	7.0378	0	0	0	0	0		7.09072
Sorl1	1.913e-15	4.126e-14	6.9378	7.0585	7.1739	7.1324	7.1477	0	0	0	0	0		7.09006
1810009N02Rik	9.796e-12	3.082e-11	7.0378	7.3514	7.2873	7.0991	6.6453	0	0	0	0	0		7.08418
Znf704	3.871e-11	9.352e-11	7.4153	6.78	6.7629	7.0246	7.438	0	0	0	0	0		7.08416
Nell2	5.906e-11	1.329e-10	6.9472	6.7004	7.0179	7.1022	7.6424	0	0	0	0	0		7.08202
Pars2	1.188e-12	5.676e-12	7.339	7.029	6.7629	7.1839	7.0736	0	0	0	0	0		7.07768
Rilpl1	2.824e-12	1.129e-11	7.1799	7.312	6.7655	7.2307	6.8814	0	0	0	0	0		7.0739
Hook1	1.576e-08	2.015e-08	7.0639	7.56	7.4943	7.3759	5.8654	0	0	0	0	0		7.0719
Stxbp5	1.699e-08	2.16e-08	10.322	10.406	10.304	10.358	10.224	3.858	2.0704	3.3219	3.3074	3.7115		7.06896
Tom1l1	1.764e-14	2.097e-13	7.2649	7.0875	6.9887	7.0661	6.9355	0	0	0	0	0		7.06854
Ctsz	9.836e-14	8.223e-13	7.0639	7.2527	6.8505	7.1649	6.991	0	0	0	0	0		7.0646
Ica1	1.026e-10	2.118e-10	9.7902	10.042	10.002	9.9874	9.6797	2.9449	2.3785	2.6323	3.2016	3.0704		7.05472
Trappc6b	7.273e-10	1.177e-09	7.2724	6.6088	6.7996	6.8048	7.7794	0	0	0	0	0		7.053
Ube2f	4.106e-06	4.502e-06	9.4219	6.9966	6.6851	6.6029	5.5546	0	0	0	0	0		7.05222
Dennd4b	2.121e-13	1.477e-12	6.7996	7.0564	7.0367	7.0885	7.2789	0	0	0	0	0		7.05202
Snrpf	1.481e-08	1.9e-08	6.8202	7.7149	7.1365	7.5917	5.9887	0	0	0	0	0		7.0504
Pof1b	2.447e-10	4.504e-10	6.7142	6.7374	7.2085	6.8839	7.6977	0	0	0	0	0		7.04834
Vti1b	7.535e-16	2.126e-14	7.1231	7.0268	7.0444	6.9201	7.1252	0	0	0	0	0		7.04792
Plin3	9.619e-12	3.046e-11	7.0811	7.2055	7.1849	7.2026	6.5638	0	0	0	0	0		7.04758
Lrrtm2	9.334e-13	4.685e-12	7.0896	6.9932	6.9355	6.8316	7.3716	0	0	0	0	0		7.0443
Cnot4	1.378e-09	2.092e-09	7.3602	7.375	7.2221	7.1127	6.1457	0	0	0	0	0		7.04314
NOGENE	3.145e-11	7.9e-11	7.1064	7.388	7.0444	7.1385	6.5188	0	0	0	0	0		7.03922
Coq7	2.33e-10	4.321e-10	7.0023	7.4463	7.1075	7.263	6.3681	0	0	0	0	0		7.03744
Cdk14	2.307e-14	2.539e-13	7.1064	7.1659	6.8777	7.1106	6.9165	0	0	0	0	0		7.03542
Dyx1c1	3.493e-15	6.57e-14	7.1799	7.0585	6.9681	6.9117	7.0542	0	0	0	0	0		7.03448
Rnf113a2	4.793e-09	6.612e-09	6.8505	7.5368	7.3092	7.4068	6.0661	0	0	0	0	0		7.03388
Ccdc22	1.984e-10	3.769e-10	6.8099	7.4504	7.1739	7.2789	6.4496	0	0	0	0	0		7.03254
Nt5dc3	2.724e-12	1.1e-11	10.331	10.299	10.352	10.265	10.794	3.4725	3.2928	3.278	3.433	3.406		7.03174
Necap2	4.607e-10	7.87e-10	6.9932	7.4479	7.1679	7.2593	6.2891	0	0	0	0	0		7.03148
Ss18l1	4.112e-08	5.014e-08	7.73	6.4757	6.2983	6.6221	8.0185	0	0	0	0	0		7.02892
Gpt	2.005e-14	2.274e-13	6.8405	7.0928	7.1033	7.1416	6.9484	0	0	0	0	0		7.02532
Znf706	2.345e-09	3.411e-09	7.7569	7.2527	6.9761	6.879	6.2593	0	0	0	0	0		7.0248
Babam2	3.203e-11	8.02e-11	6.5744	7.3707	6.8875	7.2808	7.0101	0	0	0	0	0		7.0247
Dcc	2.389e-10	4.413e-10	7.0378	7.3733	7.0279	7.3291	6.347	0	0	0	0	0		7.02302
Elfn1	7.482e-14	6.736e-13	6.9472	6.8405	7.0157	7.0682	7.2422	0	0	0	0	0		7.02276
NOGENE	1.56e-11	4.499e-11	6.9932	6.7549	7.04	6.8215	7.4983	0	0	0	0	0		7.02158
Capn5	4.23e-12	1.558e-11	6.8997	7.098	6.7129	7.0101	7.3802	0	0	0	0	0		7.02018
Wdr81	8.955e-13	4.533e-12	6.8704	7.2668	6.9932	7.1819	6.784	0	0	0	0	0		7.01926
Naa30	1.028e-15	2.637e-14	6.89	7.0693	6.9658	7.1085	7.0422	0	0	0	0	0		7.01516
Gria3	1.757e-10	3.395e-10	12.049	11.714	11.813	11.608	12.407	5.1043	4.7004	4.8679	5.1859	4.6724		7.01202
Guk1	5.401e-10	9.026e-10	10.485	10.821	10.786	10.834	10.228	3.9165	3.7115	3.7225	3.7761	2.9819		7.0091
Enoph1	4.522e-10	7.742e-10	10.857	10.619	10.692	10.63	10.565	3.511	3.6893	3.0531	4.2172	3.848		7.00888
Dnal4	2.847e-11	7.331e-11	6.5251	6.8741	7.1416	7.1898	7.3102	0	0	0	0	0		7.00816
Arhgap11a	3.999e-10	6.934e-10	6.7682	7.394	7.2574	7.2517	6.3487	0	0	0	0	0		7.004
Sec11c	3.606e-12	1.37e-11	7.0811	6.8555	6.9248	6.7629	7.3802	0	0	0	0	0		7.0009
Egfr	5.447e-15	8.997e-14	6.89	7.121	6.8985	7.0949	6.9977	0	0	0	0	0		7.00042
Chkb	2.34e-12	9.761e-12	7.3165	7.0821	6.78	6.7708	7.0444	0	0	0	0	0		6.99876
Anapc1	8.99e-12	2.886e-11	6.6696	7.2317	7.2133	7.1365	6.7415	0	0	0	0	0		6.99852
Slc4a10	1.293e-11	3.864e-11	11.878	11.708	11.58	11.619	12.181	5.0045	4.8629	4.7004	4.6439	4.7708		6.9967
Myt1l	5.671e-12	1.99e-11	6.8304	7.2621	7.1075	7.1436	6.6366	0	0	0	0	0		6.99604
Ccdc85a	6.395e-11	1.419e-10	7.0466	7.3228	7.0201	7.1749	6.4145	0	0	0	0	0		6.99578
Rcbtb2	4.845e-10	8.215e-10	7.1064	7.3689	7.0885	7.1819	6.2192	0	0	0	0	0		6.99298
Lamp3	1.447e-11	4.241e-11	7.0112	6.6352	7.4221	7.0312	6.8642	0	0	0	0	0		6.99278
Dgkh	2.989e-10	5.372e-10	10.247	10.622	10.504	10.474	10.007	3.4725	2.9449	3.8777	3.2327	3.3646		6.99232
Map4	3.579e-11	8.79e-11	13.82	13.349	13.296	13.253	13.025	6.382	6.5699	6.2288	6.2403	6.3628		6.99184
Trmt10c	2.466e-12	1.019e-11	7.2422	7.1809	6.8138	7.0056	6.706	0	0	0	0	0		6.9897
Fam133b	2.01e-14	2.275e-13	6.8605	7.1085	6.9681	6.8765	7.1293	0	0	0	0	0		6.98858
Nfib	3.814e-13	2.349e-12	6.7361	7.2288	7.0034	7.0607	6.9117	0	0	0	0	0		6.98814
Sipa1l1	2.278e-13	1.565e-12	11.203	11.113	11.02	11.066	11.01	4.0179	4.079	4.0704	3.9542	4.3505		6.988
Pnpla6	2.169e-10	4.061e-10	7.1639	7.2365	7.0821	7.1729	6.2705	0	0	0	0	0		6.98518
Ssr3	8.838e-11	1.864e-10	6.8802	6.6935	6.8392	6.8997	7.6132	0	0	0	0	0		6.98516
Rab3ip	1.887e-08	2.385e-08	6.6921	7.6837	7.2298	7.4195	5.8972	0	0	0	0	0		6.98446
Entpd1	1.378e-11	4.072e-11	7.0023	7.3345	6.953	7.079	6.5454	0	0	0	0	0		6.98284
Sh3rf3	1.428e-08	1.836e-08	7.0466	7.6221	7.0509	7.3478	5.8354	0	0	0	0	0		6.98056
Thoc2	1.437e-12	6.638e-12	7.0466	6.991	6.9704	7.225	6.6337	0	0	0	0	0		6.97334
2021-03-02	8.276e-13	4.276e-12	11.114	11.268	11.082	11.128	11.27	4.2016	4.3646	4.0444	4.3923	4		6.97182
Lpgat1	1.306e-11	3.898e-11	6.9932	6.8741	6.6582	6.9045	7.4271	0	0	0	0	0		6.97142
Rad50	4.283e-09	5.945e-09	6.6921	7.1589	6.7682	7.8826	6.3487	0	0	0	0	0		6.9701
Glmn	3.719e-11	9.061e-11	6.5744	7.1908	7.2026	7.2192	6.6625	0	0	0	0	0		6.9699
Rbbp6	9.665e-11	2.014e-10	6.9658	7.354	6.9507	7.1819	6.3906	0	0	0	0	0		6.9686
Igf2r	4.131e-13	2.484e-12	6.975	7.0067	7.2172	6.9378	6.7032	0	0	0	0	0		6.96798
Dnajb6	1.525e-10	2.997e-10	11.153	11.422	11.282	11.305	10.714	3.858	4.4529	4.4919	4.1938	4.0444		6.967
Mapkapk2	8.185e-16	2.277e-14	6.9658	7.0235	6.8342	6.9495	7.052	0	0	0	0	0		6.965
Rasa1	3.047e-10	5.465e-10	7.6344	6.9989	6.588	6.9669	6.6294	0	0	0	0	0		6.96352
Slc4a10	1.066e-11	3.287e-11	11.851	11.683	11.546	11.587	12.124	5.0045	4.8629	4.7004	4.6439	4.7708		6.9617
Kirrel3	3.28e-12	1.272e-11	6.7787	7.2365	7.0725	7.0607	6.6539	0	0	0	0	0		6.96046
Kcnc1	5.823e-10	9.644e-10	7.2192	7.3318	6.7279	7.2517	6.2649	0	0	0	0	0		6.9591
Abhd17c	2.197e-09	3.21e-09	7.1477	7.4094	6.8227	7.3273	6.0853	0	0	0	0	0		6.95848
Plekho2	3.189e-15	6.084e-14	7.0466	6.939	6.9378	7.0542	6.8099	0	0	0	0	0		6.9575
Hspa13	5.254e-12	1.867e-11	6.9932	6.9681	7.0224	7.2394	6.5469	0	0	0	0	0		6.954
4930407I10Rik	7.796e-10	1.253e-09	6.9472	7.56	7.0488	6.9542	6.2384	0	0	0	0	0		6.94972
Gatb	8.072e-14	7.082e-13	6.7892	6.991	6.896	7.1839	6.8875	0	0	0	0	0		6.94952
Ipo4	5.436e-14	5.214e-13	6.7361	7.0067	6.9738	7.1189	6.8997	0	0	0	0	0		6.94704
Apoa4	2.303e-09	3.355e-09	6.3237	7.4902	6.9635	7.4684	6.4886	0	0	0	0	0		6.94688
Snrpn	1.592e-08	2.033e-08	10.398	9.263	9.2597	9.2453	8.6202	2.7225	2.433	2.2928	2.0704	2.5361		6.94628
Rell1	2.696e-12	1.093e-11	6.7576	7.2687	6.8278	7.1085	6.7616	0	0	0	0	0		6.94484
Itgb2	6.063e-11	1.357e-10	6.4611	7.1888	7.3156	6.991	6.7616	0	0	0	0	0		6.94362
Hmgxb4	3.765e-10	6.577e-10	6.9378	7.417	6.9704	7.1365	6.2536	0	0	0	0	0		6.94306
Luc7l	2.214e-11	5.969e-11	7.1148	7.2201	6.7576	7.1148	6.5046	0	0	0	0	0		6.94238
Mvb12a	7.783e-10	1.251e-09	7.1799	7.3923	6.8851	7.0864	6.1659	0	0	0	0	0		6.94192
Serinc3	1.122e-11	3.434e-11	6.8099	6.7074	7.3837	6.7655	7.0235	0	0	0	0	0		6.938
Cdc42ep4	7.764e-10	1.248e-09	10.311	10.599	10.339	10.395	9.6012	2.9635	3.121	3.4594	3.6668	3.3646		6.93398
Neto1	2.672e-14	2.853e-13	6.8099	6.9796	6.9117	7.1303	6.8304	0	0	0	0	0		6.93238
Sh3gl1	1.885e-11	5.216e-11	12.407	12.685	12.408	12.55	12.034	5.6177	5.3576	5.6235	5.5668	5.2593		6.93182
Myl9	8.039e-11	1.719e-10	6.9841	7.1293	6.9248	7.2649	6.3434	0	0	0	0	0		6.9293
Oxa1l	6.327e-11	1.407e-10	6.5376	6.9681	7.0056	6.6977	7.4346	0	0	0	0	0		6.92872
Ppp1r16a	2.603e-12	1.06e-11	7.1957	6.9366	6.9807	6.9692	6.5607	0	0	0	0	0		6.92858
Zfyve9	2.16e-11	5.845e-11	7.1396	7.2527	6.8112	6.9472	6.487	0	0	0	0	0		6.92754
Vars2	4.351e-12	1.596e-11	6.7361	7.0853	7.0704	7.1436	6.594	0	0	0	0	0		6.92588
Pank1	5.948e-12	2.074e-11	7.2873	6.8654	6.6424	6.7629	7.0607	0	0	0	0	0		6.92374
Bcs1l	3.608e-10	6.328e-10	7.029	6.588	6.8417	6.5546	7.6014	0	0	0	0	0		6.92294
Itga6	3.951e-10	6.864e-10	6.9189	7.2384	7.1283	7.1283	6.1759	0	0	0	0	0		6.91796
Soga3	1.573e-11	4.532e-11	11.855	11.491	11.601	11.52	11.99	4.848	4.9864	4.8125	4.4854	4.7388		6.91718
Mcfd2	3.638e-09	5.107e-09	7.6802	6.8405	6.3975	6.3716	7.2928	0	0	0	0	0		6.91652
Lrsam1	2.198e-10	4.11e-10	7.0553	7.3794	6.7428	7.0477	6.3183	0	0	0	0	0		6.9087
Vezt	5.253e-10	8.816e-10	7.6914	6.8035	6.7482	6.6907	6.5969	0	0	0	0	0		6.90614
Syne1	6.142e-13	3.381e-12	11.472	11.582	11.386	11.474	11.252	4.6088	4.7388	4.4854	4.3785	4.4263		6.90564
Gspt2	8.935e-11	1.881e-10	6.3663	6.8716	7.121	7.312	6.8367	0	0	0	0	0		6.90152
Tbc1d5	2.59e-12	1.056e-11	6.7361	6.7415	6.7827	6.9738	7.2715	0	0	0	0	0		6.90112
Slc27a1	1.962e-14	2.239e-13	7.0023	6.9189	6.8342	7.0224	6.7225	0	0	0	0	0		6.90006
Prrc1	4.49e-10	7.702e-10	6.8505	7.4561	6.8035	7.1169	6.2724	0	0	0	0	0		6.89988
Kbtbd11	2.155e-10	4.042e-10	6.975	7.3983	6.8278	7.0011	6.2965	0	0	0	0	0		6.89974
B4galnt1	1.747e-10	3.377e-10	6.5125	7.2983	7.0629	7.1649	6.4578	0	0	0	0	0		6.89928
Kcnip4	9.849e-14	8.223e-13	7.0201	6.8839	6.6977	6.8151	7.0715	0	0	0	0	0		6.89766
Nlrp1b	1.31e-07	1.54e-07	7.5932	7.5691	7.1568	6.7347	5.4229	0	0	0	0	0		6.89534
Ireb2	4.644e-13	2.733e-12	6.7142	7.0123	6.9658	7.0864	6.6767	0	0	0	0	0		6.89108
Dlg3	9.777e-12	3.08e-11	11.794	11.893	11.943	11.99	11.571	4.8329	5.1938	5.1043	4.9542	4.6611		6.88894
Washc1	1.669e-11	4.745e-11	6.7469	7.0875	7.0011	7.1477	6.4496	0	0	0	0	0		6.88656
Srek1ip1	1.534e-12	7.006e-12	7.2346	6.9307	6.7004	6.7996	6.7549	0	0	0	0	0		6.88404
Mal2	2.483e-10	4.568e-10	7.0201	7.246	6.9484	7.0056	6.1878	0	0	0	0	0		6.88158
Rnf41	5.147e-08	6.225e-08	7.1799	7.4111	6.9296	7.3759	5.5046	0	0	0	0	0		6.88022
Ipo5	2.431e-11	6.43e-11	10.828	10.867	10.975	10.788	11.386	4.2327	4.1619	4.0444	4.2095	3.797		6.8797
Med10	1.244e-09	1.904e-09	6.6118	7.3029	7.1117	7.2307	6.1375	0	0	0	0	0		6.87892
Cdc42ep4	1.161e-09	1.792e-09	10.246	10.57	10.295	10.351	9.5052	2.9635	3.121	3.4594	3.6668	3.3646		6.87838
Gng4	6.571e-13	3.566e-12	6.7469	6.8592	6.6511	7.1283	7.0034	0	0	0	0	0		6.87778
Shf	9.631e-13	4.806e-12	7.0896	6.9224	7.0101	6.7682	6.585	0	0	0	0	0		6.87506
Wdr44	2.11e-11	5.723e-11	10.126	10.279	10.292	10.317	10.235	3.511	3.7115	2.9635	3.4594	3.2327		6.87418
Aldh1l2	6.416e-12	2.206e-11	7.2724	6.8061	6.6264	6.7032	6.9554	0	0	0	0	0		6.8727
Mybbp1a	5.745e-11	1.298e-10	7.1396	6.591	7.1365	6.4229	7.04	0	0	0	0	0		6.866
Samd14	2.196e-10	4.108e-10	7.2114	7.0455	7.0444	6.8151	6.1997	0	0	0	0	0		6.86322
Herc1	9.068e-11	1.905e-10	7.2649	7.0906	6.7892	6.8392	6.3291	0	0	0	0	0		6.8626
9030624J02Rik	3.561e-11	8.76e-11	6.7576	7.3983	6.797	6.8022	6.5577	0	0	0	0	0		6.86256
Lyrm1	4.686e-10	7.975e-10	6.7892	7.2574	6.9784	7.1385	6.1477	0	0	0	0	0		6.86224
Arc	5.63e-14	5.381e-13	6.8304	6.8342	7.0629	6.8972	6.6724	0	0	0	0	0		6.85942
Crtc1	3.838e-11	9.297e-11	10.22	10.433	10.284	10.433	9.7144	3.3785	3.4594	3.406	3.3923	3.1538		6.85888
Pcdhb15	2.357e-12	9.815e-12	6.8802	7.0747	6.7748	7.0378	6.5188	0	0	0	0	0		6.85726
Nme7	3.978e-11	9.574e-11	6.5622	7.1759	7.0157	7.0639	6.466	0	0	0	0	0		6.85674
Spock1	1.621e-09	2.433e-09	7.3602	7.1106	6.7428	7.0312	6.0334	0	0	0	0	0		6.85564
Col4a3bp	9.146e-17	4.932e-15	6.8505	6.784	6.9577	6.8417	6.8442	0	0	0	0	0		6.85562
Rnf7	5.833e-09	7.935e-09	7.2498	7.2826	6.7576	7.1344	5.8505	0	0	0	0	0		6.85498
Eif3m	4.184e-10	7.217e-10	7.1878	7.2826	6.6294	6.9378	6.2327	0	0	0	0	0		6.85406
Tpgs1	1.462e-12	6.732e-12	7.098	7.0509	6.6668	6.7853	6.6525	0	0	0	0	0		6.8507
Dars2	3.389e-12	1.303e-11	6.6809	7.1609	6.8442	6.9887	6.5744	0	0	0	0	0		6.84982
Sntb1	3.087e-09	4.389e-09	6.588	7.4603	7.098	7.0564	6.029	0	0	0	0	0		6.84634
Dnajb14	1.582e-08	2.021e-08	6.6809	6.1759	6.8367	6.5546	7.9779	0	0	0	0	0		6.8452
Nol3	1.788e-11	5.012e-11	6.7892	7.1293	6.7032	7.1365	6.4643	0	0	0	0	0		6.8445
Coq8a	7.177e-11	1.565e-10	6.4611	7.2288	6.8691	7.1189	6.5251	0	0	0	0	0		6.8406
Fam185a	3.289e-13	2.077e-12	7.029	6.7996	6.8442	6.9542	6.5714	0	0	0	0	0		6.83968
Rtn1	3.239e-06	3.56e-06	8.0682	7.4741	7.799	7.7642	9.1233	0	0	1.6781	2.7225	1.6323		6.83918
Cyth3	8.734e-12	2.823e-11	6.487	7.1033	6.7129	7.0928	6.7735	0	0	0	0	0		6.8339
Efr3b	1.323e-10	2.653e-10	9.4049	9.5459	9.2068	9.3615	9.088	2.5361	2.433	2.7655	2.7442	1.9635		6.83296
Rlbp1	2.436e-11	6.438e-11	7.0811	7.029	6.797	6.9224	6.3327	0	0	0	0	0		6.83244
Cdh8	3.694e-07	4.213e-07	7.7462	7.5744	7.6036	7.6373	7.12	0	0	0	2.0356	1.4854		6.8321
Ptbp3	1.956e-11	5.371e-11	7.2498	6.8617	6.7602	6.8505	6.433	0	0	0	0	0		6.83104
Ppfia2	4.125e-10	7.125e-10	10.567	10.376	10.331	10.366	10.516	4.2327	3.406	3.7655	3.4463	3.1538		6.83034
Il1rapl1	3.703e-11	9.031e-11	6.3237	6.8654	6.8367	6.9248	7.1938	0	0	0	0	0		6.82888
Psmd12	4.006e-11	9.629e-11	10.941	11.024	11.157	11.071	11.422	4.5668	3.9819	4.079	4.3434	4.5173		6.82532
Fkbpl	8.451e-11	1.792e-10	6.9658	7.1001	6.7918	7.0312	6.2327	0	0	0	0	0		6.82432
Cux1	8.787e-09	1.16e-08	7.5992	7.0715	6.6482	6.9093	5.8875	0	0	0	0	0		6.82314
Aatk	5.94e-13	3.294e-12	6.6352	7.0067	6.8138	7.0123	6.6323	0	0	0	0	0		6.82006
Bag5	2.728e-08	3.393e-08	9.6154	9.7652	9.4959	9.6411	9.4242	3.6088	2.9069	1.6323	2.8278	2.8679		6.81962
Spata33	2.707e-11	7.034e-11	6.7892	7.1054	6.9612	6.8972	6.3111	0	0	0	0	0		6.81282
Abca5	3.939e-10	6.847e-10	6.6921	7.321	6.7211	7.1085	6.2211	0	0	0	0	0		6.81276
Ggps1	3.667e-12	1.39e-11	6.6118	7.1809	6.5999	6.8265	6.8442	0	0	0	0	0		6.81266
Arhgap25	3.839e-12	1.444e-11	6.7682	7.0157	6.9554	6.8948	6.4195	0	0	0	0	0		6.81072
Tcof1	1.014e-09	1.591e-09	10.061	10.301	10.118	10.169	9.5112	3.3646	3.5729	3.4195	2.6323	3.121		6.80998
Mvb12b	4.548e-11	1.07e-10	6.8405	6.5607	7.1548	7.079	6.406	0	0	0	0	0		6.8082
Atp1a4	2.016e-10	3.821e-10	6.5622	6.7374	6.4561	6.8291	7.4537	0	0	0	0	0		6.8077
Mtmr6	2.234e-11	6.021e-11	7.1639	6.588	6.4463	6.8125	7.0157	0	0	0	0	0		6.80528
Pcbp2	8.559e-14	7.444e-13	12.261	12.354	12.363	12.424	12.357	5.7388	5.4983	5.4951	5.6177	5.3854		6.80474
mKIAA0757	2.169e-10	4.061e-10	6.5999	7.3584	6.7774	6.9715	6.3147	0	0	0	0	0		6.80438
Adam15	9.285e-10	1.47e-09	6.8802	7.2527	6.8912	6.9932	6.0045	0	0	0	0	0		6.80436
Asb13	1.449e-11	4.242e-11	6.7142	7.1241	6.853	6.9472	6.3802	0	0	0	0	0		6.80374
Gsk3b	1.074e-11	3.306e-11	11.891	12.032	12.149	12.024	12.167	5.3291	5.3785	4.8125	5.3854	5.3398		6.80354
Fhod3	1.609e-09	2.418e-09	6.4998	7.3029	6.8777	7.2307	6.1022	0	0	0	0	0		6.80266
Snx19	1.044e-13	8.592e-13	6.7996	6.9646	6.8035	6.8814	6.5607	0	0	0	0	0		6.80196
Mtch2	6.655e-09	8.953e-09	10.271	10.012	10.237	10.084	11.289	3.406	3.848	3.1538	3.8875	3.5969		6.80016
Sf3a1	4.57e-13	2.702e-12	10.887	11.032	11.031	11	10.68	4.1043	4.225	3.9819	4.0959	4.225		6.79958
Atrn	2.384e-14	2.598e-13	6.975	6.7374	6.7004	6.6935	6.8839	0	0	0	0	0		6.79804
Iah1	2.422e-09	3.516e-09	7.4553	7.0422	6.6482	6.8291	6.0135	0	0	0	0	0		6.79766
Mrpl11	6.841e-10	1.113e-09	10.848	11.221	10.943	11.068	10.243	4.1538	3.9069	3.7334	4.3992	4.1457		6.7968
Pcbp2	7.658e-14	6.802e-13	12.261	12.341	12.347	12.408	12.351	5.7388	5.4983	5.4951	5.6177	5.3854		6.79454
Pcsk1	1.414e-13	1.076e-12	6.9565	6.8654	6.5438	6.8417	6.7549	0	0	0	0	0		6.79246
Bbs9	3.038e-07	3.482e-07	7.2946	7.6294	6.6879	7.2007	5.1416	0	0	0	0	0		6.79084
Sec24b	5.675e-10	9.423e-10	6.6696	7.0715	6.8342	7.2649	6.1106	0	0	0	0	0		6.79016
Arrb2	1.737e-13	1.261e-12	6.8605	6.6424	6.9784	6.6029	6.8654	0	0	0	0	0		6.78992
Emc2	4.521e-09	6.253e-09	6.9658	7.1689	6.7509	7.2413	5.8202	0	0	0	0	0		6.78942
Maea	3.535e-11	8.701e-11	6.3802	6.9069	7.1829	6.8924	6.582	0	0	0	0	0		6.78888
Sf3a1	5.319e-13	3.04e-12	10.887	11.019	11.021	10.985	10.657	4.1043	4.225	3.9819	4.0959	4.225		6.78738
Atl2	7.163e-13	3.805e-12	6.9472	6.8592	6.5774	6.5804	6.9577	0	0	0	0	0		6.78438
Mcur1	3.201e-12	1.249e-11	6.5622	7.1262	6.8112	6.8367	6.5759	0	0	0	0	0		6.78244
Cmtm4	2.609e-10	4.778e-10	7.2649	7.0477	6.5607	6.7879	6.2441	0	0	0	0	0		6.78106
Rbm22	3.174e-16	1.16e-14	6.6582	6.78	6.848	6.7957	6.8189	0	0	0	0	0		6.78016
Slc39a7	3.917e-08	4.785e-08	7.0378	6.1169	6.6323	6.1619	7.9484	0	0	0	0	0		6.77946
Bcar1	8.341e-13	4.301e-12	6.8997	6.9565	6.7748	6.8022	6.4545	0	0	0	0	0		6.77754
Pde1a	8.806e-13	4.471e-12	10.966	11.055	11.185	11.109	11.448	4.4195	4.4396	4.3992	4.263	4.3576		6.77682
Ppp3cc	3.469e-09	4.887e-09	6.8304	7.2026	6.8716	7.1457	5.8278	0	0	0	0	0		6.77562
Vps8	4.654e-07	5.274e-07	6.2798	7.6294	6.7996	7.8542	5.3111	0	0	0	0	0		6.77482
Erbin	7.353e-16	2.089e-14	6.7682	6.784	6.9045	6.7004	6.7142	0	0	0	0	0		6.77426
Ssbp3	5.63e-10	9.357e-10	6.2798	7.0157	7.1231	7.1365	6.3038	0	0	0	0	0		6.77178
Pycr3	1.335e-05	1.444e-05	9.6591	9.8248	9.509	9.8283	8.7177	3.4983	3.406	3.6554	0	3.121		6.77164
Lsm12	2.487e-09	3.599e-09	10.092	10.342	9.988	10.316	9.6889	3.6893	2.7442	3.6088	2.8875	3.6439		6.77064
Rad21	4.756e-11	1.106e-10	6.4212	7.0906	6.7004	7.1189	6.5125	0	0	0	0	0		6.76872
Atxn1	1.115e-09	1.729e-09	6.4998	7.1689	7.0768	7.0378	6.0466	0	0	0	0	0		6.76598
Efr3a	3.053e-13	1.963e-12	6.975	6.9129	6.7004	6.6337	6.591	0	0	0	0	0		6.7626
Syt13	7.717e-13	4.034e-12	6.9189	6.8125	6.5607	6.9472	6.5469	0	0	0	0	0		6.75724
Cab39l	1.121e-11	3.433e-11	6.6352	7.1085	6.6949	6.9224	6.4111	0	0	0	0	0		6.75442
NOGENE	6.243e-11	1.391e-10	6.8405	7.0179	6.6921	6.9955	6.2016	0	0	0	0	0		6.74952
Pnck	1.711e-13	1.246e-12	6.9472	6.853	6.6851	6.7266	6.5329	0	0	0	0	0		6.74896
Bdnf	2.371e-12	9.859e-12	6.8099	6.9507	6.8617	6.7428	6.3768	0	0	0	0	0		6.74838
Scaper	4.95e-15	8.466e-14	6.5744	6.8379	6.7482	6.7931	6.7866	0	0	0	0	0		6.74804
4933427D14Rik	1.023e-09	1.603e-09	6.5744	6.7482	7.5204	6.6582	6.2365	0	0	0	0	0		6.74754
Atp23	2.31e-14	2.539e-13	6.6467	6.6738	6.9248	6.6611	6.8304	0	0	0	0	0		6.74736
Gm27029	2.067e-10	3.905e-10	6.6696	7.0157	6.9955	6.9495	6.1001	0	0	0	0	0		6.74608
Bub3	1.689e-09	2.523e-09	9.4202	9.6005	9.5322	9.5657	9.1464	2.9069	2.585	2	2.8278	3.263		6.73646
Smarca4	6.108e-13	3.37e-12	6.6809	6.8467	6.5638	6.5865	7.0034	0	0	0	0	0		6.73626
Gramd1b	3.231e-13	2.052e-12	6.6809	6.9165	6.4709	6.7682	6.843	0	0	0	0	0		6.7359
Mrpl41	2.832e-10	5.114e-10	9.9043	10.134	9.7539	9.9115	9.1911	2.8074	2.9449	3.3074	3.121	3.0356		6.7357
Snrnp27	5.925e-09	8.048e-09	6.9284	7.0693	7.0607	6.9248	5.6865	0	0	0	0	0		6.73394
Lpin2	3.055e-12	1.2e-11	6.7576	6.9819	6.7996	6.7629	6.3593	0	0	0	0	0		6.73226
Mrpl47	3.783e-12	1.427e-11	6.8605	6.7682	6.6823	6.9841	6.3646	0	0	0	0	0		6.73194
Plaa	1.037e-11	3.228e-11	10.458	10.631	10.492	10.606	10.679	3.5729	4.1127	3.7115	4.1043	3.7225		6.72842
Ddx42	1.589e-08	2.029e-08	9.6846	10.249	9.8631	10.092	8.9724	3.3219	3.406	2.9069	2.3219	3.263		6.72828
Birc6	6.517e-11	1.441e-10	6.8802	6.5392	6.4709	6.4983	7.246	0	0	0	0	0		6.72692
Ntmt1	1.297e-10	2.606e-10	6.6118	6.5954	6.5804	6.4725	7.3698	0	0	0	0	0		6.72598
Sap30bp	3.032e-12	1.194e-11	6.9093	6.7616	6.3802	6.625	6.9307	0	0	0	0	0		6.72136
Wrnip1	4.433e-11	1.047e-10	6.9565	6.9681	6.6879	6.8022	6.1918	0	0	0	0	0		6.7213
Mrps6	2.168e-10	4.061e-10	7.1148	6.9105	6.7549	6.7374	6.0811	0	0	0	0	0		6.71974
Dhx9	1.974e-10	3.753e-10	10.734	10.554	10.545	10.509	11.156	4.3074	3.7761	3.6554	3.991	4.1859		6.71644
Gramd4	9.287e-11	1.946e-10	6.6352	7.1928	6.503	6.9296	6.3147	0	0	0	0	0		6.71506
Lrfn5	2.906e-12	1.154e-11	7.0201	6.8405	6.7156	6.5094	6.4854	0	0	0	0	0		6.7142
Fndc3a	9.89e-13	4.899e-12	6.3663	6.8189	6.8367	6.8022	6.7428	0	0	0	0	0		6.71338
Nudcd1	5.08e-13	2.947e-12	6.6352	6.9819	6.7101	6.7522	6.4854	0	0	0	0	0		6.71296
Tsta3	5.04e-10	8.515e-10	6.8605	7.0564	6.7361	6.9296	5.9681	0	0	0	0	0		6.71014
Cd99l2	4.752e-11	1.106e-10	6.6352	6.7748	6.3219	6.6118	7.1997	0	0	0	0	0		6.70868
Emc10	2.485e-07	2.861e-07	6.8704	7.0747	7.4603	7.0477	5.0575	0	0	0	0	0		6.70212
Larp4	1.321e-13	1.028e-12	6.9565	6.6235	6.6582	6.671	6.5607	0	0	0	0	0		6.69398
Ppp2r5e	1.489e-09	2.247e-09	11.01	10.452	10.979	10.604	11.655	4.2928	4	4.2705	4.4396	4.2403		6.69136
Dpf2	1.039e-08	1.36e-08	6.8704	7.1859	6.8227	6.9819	5.594	0	0	0	0	0		6.69098
Nckipsd	2.728e-10	4.95e-10	6.9565	7.0179	6.5267	6.8839	6.0661	0	0	0	0	0		6.69022
Cnr1	2.311e-07	2.67e-07	6.4077	7.2574	7.2085	7.4009	5.1699	0	0	0	0	0		6.68888
C1qtnf4	1.626e-11	4.649e-11	6.7142	6.8839	6.5173	7.0123	6.3165	0	0	0	0	0		6.68884
Adi1	7.482e-12	2.479e-11	6.6235	6.7996	6.8741	6.8629	6.2705	0	0	0	0	0		6.68612
Lynx1	8.321e-10	1.329e-09	7.3318	6.3523	6.5204	6.246	6.9796	0	0	0	0	0		6.68602
Papss1	5.912e-11	1.33e-10	6.89	6.9425	6.479	6.9069	6.2055	0	0	0	0	0		6.68478
Srsf4	1.208e-12	5.752e-12	10.417	10.207	10.098	10.119	10.125	3.5729	3.4854	3.4195	3.7334	3.3363		6.6837
Vwa8	1.376e-10	2.751e-10	9.8019	9.9843	9.6992	9.8373	9.1308	3.0704	3.0531	2.9819	3.1859	2.7655		6.67934
Fhit	4.803e-13	2.814e-12	6.7576	6.8467	6.4886	6.8176	6.4822	0	0	0	0	0		6.67854
Bicd1	5.898e-10	9.753e-10	6.5376	7.1033	6.6949	7.0356	6.0179	0	0	0	0	0		6.67786
NOGENE	7.286e-14	6.628e-13	6.8099	6.784	6.591	6.7266	6.4741	0	0	0	0	0		6.67712
Mrpl14	2.145e-08	2.693e-08	7.1148	7.1739	6.55	7.0168	5.5267	0	0	0	0	0		6.67644
Slc6a9	2.685e-10	4.896e-10	6.394	7.0157	6.7032	7.097	6.1719	0	0	0	0	0		6.67636
Vti1a	8.526e-12	2.768e-11	6.3237	6.9704	6.6323	6.879	6.5759	0	0	0	0	0		6.67626
Itgam	8.285e-11	1.763e-10	6.1878	7.0101	6.8777	6.8417	6.4561	0	0	0	0	0		6.67468
NOGENE	4.114e-09	5.732e-09	6.9932	6.2288	6.3452	6.2891	7.5038	0	0	0	0	0		6.67202
Eef1g	1.809e-10	3.478e-10	12.767	12.907	13.123	12.951	13.412	6.8278	6.3165	6.0639	6.246	6.3505		6.67106
Syt3	3.694e-11	9.014e-11	6.4741	7.1262	6.394	6.8455	6.5062	0	0	0	0	0		6.6692
Mars	1.366e-12	6.353e-12	10.46	10.684	10.806	10.685	10.903	3.991	4.079	4.0444	3.8777	4.2016		6.66886
Pkn1	1.746e-14	2.093e-13	6.487	6.6668	6.6539	6.7087	6.8138	0	0	0	0	0		6.66604
Gm45208	1.584e-08	2.024e-08	6.8304	6.1416	6.2854	6.3165	7.7515	0	0	0	0	0		6.66508
Trim44	3.253e-10	5.794e-10	6.8405	6.8215	6.7576	6.9472	5.9495	0	0	0	0	0		6.66326
Coil	8.562e-14	7.444e-13	6.4346	6.8342	6.6668	6.6767	6.7004	0	0	0	0	0		6.66254
Nrip3	3.339e-10	5.914e-10	6.8997	7.0011	6.6482	6.7879	5.975	0	0	0	0	0		6.66238
Inpp5a	6.708e-11	1.478e-10	9.317	9.6114	9.6064	9.6325	9.4037	2.8679	2.7004	2.4854	3.2928	2.926		6.6597
Serp1	1.066e-14	1.429e-13	6.6352	6.7748	6.7101	6.6767	6.479	0	0	0	0	0		6.65516
GOLGA7B	6.008e-10	9.913e-10	6.8802	6.6029	6.2114	6.2891	7.2696	0	0	0	0	0		6.65064
Gm21992	1.45e-11	4.242e-11	6.6235	6.7748	6.8086	6.8505	6.1839	0	0	0	0	0		6.64826
Cavin2	4.035e-09	5.631e-09	7.507	6.732	6.4709	6.5484	5.9819	0	0	0	0	0		6.64804
Ddb1	1.179e-09	1.817e-09	12.043	11.333	11.636	11.452	12.074	5.3255	5.3957	5.1001	4.5729	4.9117		6.64642
Snx1	1.229e-10	2.486e-10	11.637	11.822	11.703	11.757	11.479	5.1169	5.2891	4.843	4.5607	5.3646		6.64474
Tbcel	9.407e-10	1.487e-09	6.7892	6.9875	6.6191	6.9623	5.8629	0	0	0	0	0		6.6442
Ube2o	1.326e-10	2.658e-10	11.306	11.552	11.528	11.505	11.166	5.0356	4.5298	4.3923	4.7442	5.1375		6.64352
Smim20	1.397e-08	1.797e-08	6.2798	7.4068	6.8253	6.9669	5.7334	0	0	0	0	0		6.64244
Chordc1	9.788e-12	3.081e-11	10.672	10.617	10.833	10.784	10.895	4.3074	3.8875	4.0179	4.4263	3.9635		6.63968
Inpp5f	6.22e-11	1.387e-10	7.0023	6.588	6.7655	6.717	6.1169	0	0	0	0	0		6.63794
Stx5a	2.989e-11	7.612e-11	6.6467	6.89	6.7129	6.8022	6.1272	0	0	0	0	0		6.6358
Brap	2.068e-08	2.602e-08	6.55	7.4195	6.6921	6.9378	5.5699	0	0	0	0	0		6.63386
Slc2a13	1.912e-11	5.276e-11	6.8505	6.8716	6.4429	6.7682	6.2327	0	0	0	0	0		6.63318
Mrps5	7.176e-13	3.808e-12	6.7361	6.8379	6.3416	6.6582	6.588	0	0	0	0	0		6.63236
Cdc34	4.169e-10	7.193e-10	6.55	6.8405	6.983	6.8367	5.9425	0	0	0	0	0		6.63054
Car10	8.469e-09	1.12e-08	7.5691	6.6738	6.479	6.5484	5.8802	0	0	0	0	0		6.6301
Abr	1.296e-11	3.872e-11	12.129	12.246	12.268	12.192	12.505	5.9165	5.6724	5.6439	5.2817	5.6781		6.62948
Snap29	1.384e-10	2.762e-10	8.9307	9.4832	9.1413	9.281	8.9186	2.7866	2.6554	2.5361	2.0704	2.5607		6.62912
Gm20547	4.627e-11	1.085e-10	7.0112	6.6767	6.6352	6.6879	6.1334	0	0	0	0	0		6.62888
Ncald	4.51e-10	7.728e-10	12.647	12.35	12.532	12.465	13.386	6.098	6.1579	5.9355	6.0312	6.0157		6.62834
Clvs2	6.793e-14	6.29e-13	6.7142	6.3854	6.6453	6.6738	6.7225	0	0	0	0	0		6.62824
Llgl1	1.186e-12	5.676e-12	6.6696	6.8442	6.4463	6.7629	6.3854	0	0	0	0	0		6.62168
Fgd4	2.827e-11	7.294e-11	7.0201	6.6029	6.4998	6.7602	6.225	0	0	0	0	0		6.6216
Tnfaip8l2	1.728e-11	4.879e-11	6.8505	6.8189	6.4886	6.7549	6.1938	0	0	0	0	0		6.62134
Clip3	2.494e-13	1.672e-12	6.6921	6.6596	6.6482	6.7655	6.3398	0	0	0	0	0		6.62104
Mtmr12	3.101e-10	5.548e-10	6.89	6.1759	6.6977	6.2403	7.0875	0	0	0	0	0		6.61828
Sarm1	5.235e-15	8.85e-14	6.6118	6.5157	6.591	6.7853	6.5789	0	0	0	0	0		6.61654
D430041D05Rik	3.574e-10	6.284e-10	12.298	12.483	12.186	12.295	11.586	5.7334	5.6611	5.7279	5.3957	5.2517		6.61564
Ftl1	1.881e-07	2.185e-07	6.3802	7.438	6.8086	7.2649	5.1859	0	0	0	0	0		6.61552
Ndrg4	6.616e-11	1.461e-10	10.188	10.276	10.078	10.165	10.42	3.1375	3.6206	3.9727	3.6206	3.7115		6.61282
Rps8	4.277e-11	1.019e-10	11.92	11.934	11.968	11.878	12.372	5.6467	5.3363	5.0356	5.5577	5.433		6.61254
Ccdc43	5.686e-09	7.743e-09	6.7142	6.9761	6.7334	7.0224	5.6118	0	0	0	0	0		6.61158
Snrpd1	3.652e-11	8.937e-11	6.5744	6.8948	6.6977	6.78	6.1064	0	0	0	0	0		6.61066
Gng3	2.489e-12	1.025e-11	12.371	12.426	12.346	12.434	12.671	5.843	6.0488	5.8972	5.8505	5.5638		6.60894
Nhlrc2	2.066e-14	2.324e-13	6.55	6.7774	6.4676	6.6738	6.5744	0	0	0	0	0		6.60864
Sin3a	7.12e-12	2.394e-11	6.7142	6.4229	6.3646	6.5577	6.9819	0	0	0	0	0		6.60826
Tcf25	1.257e-11	3.769e-11	6.5125	6.3558	6.7655	6.4128	6.9944	0	0	0	0	0		6.6082
Xrcc1	1.56e-10	3.058e-10	6.7576	6.8405	6.6639	6.8099	5.9635	0	0	0	0	0		6.60708
Sbno1	9.44e-12	2.998e-11	6.6118	6.8985	6.6103	6.7115	6.1957	0	0	0	0	0		6.60556
Nrf1	6.098e-10	1.005e-09	6.8605	6.7004	6.858	6.7708	5.8379	0	0	0	0	0		6.60552
Scly	1.244e-08	1.613e-08	6.1231	7.312	6.9378	6.879	5.7708	0	0	0	0	0		6.60454
Cstf3	9.924e-15	1.362e-13	6.5999	6.7708	6.4919	6.6308	6.5236	0	0	0	0	0		6.6034
Stum	3.244e-12	1.261e-11	6.7996	6.8125	6.3975	6.6639	6.3309	0	0	0	0	0		6.60088
Rnf40	1.253e-11	3.759e-11	7.0023	6.5577	6.2687	6.5157	6.6596	0	0	0	0	0		6.6008
Csnk2b	5.243e-12	1.865e-11	10.941	11.053	10.97	10.998	10.71	4.1779	4.2095	4.2705	4.3434	4.6724		6.59966
Commd1	1.054e-09	1.646e-09	6.7032	6.9542	6.7918	6.7576	5.784	0	0	0	0	0		6.59816
Trappc11	6.917e-10	1.124e-09	6.3802	6.2891	6.6073	6.347	7.3531	0	0	0	0	0		6.59534
Supv3l1	1.066e-12	5.206e-12	6.3092	6.7616	6.7482	6.479	6.6767	0	0	0	0	0		6.59494
Arl6ip4	1.663e-09	2.491e-09	7.4017	6.6029	6.1457	6.2574	6.5638	0	0	0	0	0		6.5943
Ophn1	1.013e-09	1.591e-09	6.6235	6.121	6.3452	6.5361	7.3452	0	0	0	0	0		6.5942
Mrpl18	3.793e-15	7.009e-14	6.6582	6.6381	6.4919	6.6907	6.487	0	0	0	0	0		6.59318
Arpc2	6.026e-11	1.35e-10	12.479	12.444	12.518	12.486	13.115	6.2055	6.0067	5.8125	6.1334	5.9449		6.5878
Ampd3	4.466e-14	4.416e-13	6.6352	6.5546	6.4643	6.4886	6.7892	0	0	0	0	0		6.58638
Rhot1	1.202e-09	1.848e-09	8.8651	9.0359	9.0037	8.9924	9.1908	2.7225	2.3785	2.1375	3.0356	1.8875		6.58526
Uck2	1.227e-12	5.832e-12	6.6467	6.8342	6.5173	6.6308	6.2928	0	0	0	0	0		6.58436
Spcs1	2.047e-13	1.431e-12	6.4346	6.4396	6.7629	6.5423	6.7388	0	0	0	0	0		6.58364
Spast	3.953e-09	5.528e-09	10.159	10.486	10.399	10.432	9.4292	3.9449	3.1699	3.5729	3.406	3.8972		6.58286
Isy1	3.13e-10	5.593e-10	6.5622	6.9623	6.7748	6.6879	5.9189	0	0	0	0	0		6.58122
Zswim8	5.884e-11	1.326e-10	7.0378	6.6088	6.6851	6.394	6.1799	0	0	0	0	0		6.58112
Gpatch11	7.216e-08	8.642e-08	6.588	7.3056	6.6511	7.0885	5.2705	0	0	0	0	0		6.58074
Hdlbp	1.216e-10	2.464e-10	12.441	12.253	12.051	12.176	11.578	5.4886	5.7469	5.5173	5.4822	5.3611		6.58058
Spag9	4.075e-14	4.099e-13	11.284	11.212	11.142	11.088	11.187	4.7761	4.5173	4.6206	4.5789	4.5173		6.58056
Rbms3	5.475e-09	7.483e-09	6.4998	7.0213	6.896	6.8629	5.6206	0	0	0	0	0		6.58012
Fam103a1	4.436e-09	6.142e-09	6.6921	7.1436	6.5204	6.8654	5.6753	0	0	0	0	0		6.57936
Cstb	1.24e-09	1.898e-09	10.81	11.172	11.116	11.089	10.352	4.8777	4.1619	4.0444	4.3646	4.1938		6.57932
Atp1b2	4.566e-10	7.812e-10	12.458	12.24	12.3	12.206	13.18	5.926	5.7918	5.7944	6.0045	5.975		6.57846
Ubap2	3.158e-12	1.235e-11	6.6921	6.3201	6.8392	6.6668	6.3681	0	0	0	0	0		6.57726
Actr8	2.483e-09	3.594e-09	6.6582	7.1538	6.5407	6.7748	5.7495	0	0	0	0	0		6.5754
Cnot9	1.137e-11	3.467e-11	6.4212	6.8985	6.4709	6.7957	6.2798	0	0	0	0	0		6.57322
Dnajb6	2.977e-10	5.357e-10	10.751	11.052	10.889	10.913	10.301	3.858	4.4529	4.4919	4.1938	4.0444		6.573
Zc3h15	1.022e-10	2.113e-10	7.0112	6.5078	6.7576	6.5062	6.0811	0	0	0	0	0		6.57278
Commd4	1.781e-10	3.431e-10	6.55	7.0747	6.04	6.671	6.5267	0	0	0	0	0		6.57248
Begain	1.136e-09	1.759e-09	10.718	10.279	10.076	10.203	10.004	3.5607	3.8278	3.0875	4.009	3.9355		6.5719
Nxph1	5.955e-11	1.338e-10	6.0553	6.7576	6.9045	6.6147	6.5236	0	0	0	0	0		6.57114
Gk	8.015e-11	1.716e-10	10.798	11	10.91	10.95	10.819	4.2555	3.8278	4.6668	4.3291	4.5484		6.56988
Ccdc28a	3.09e-08	3.821e-08	6.394	7.3514	6.6823	6.9519	5.4692	0	0	0	0	0		6.56976
Rmdn3	1.266e-09	1.934e-09	10.164	10.226	10.22	10.221	10.44	4.1699	3.7334	4.0356	3.0179	3.4725		6.56834
Fam129b	3.828e-11	9.29e-11	6.7252	6.2288	6.5407	6.347	6.9955	0	0	0	0	0		6.56744
Arpc2	7.399e-11	1.608e-10	12.456	12.408	12.496	12.453	13.103	6.2055	6.0067	5.8125	6.1334	5.9449		6.5626
Robo2	8.776e-11	1.853e-10	6.1558	6.8125	6.6949	6.8948	6.2441	0	0	0	0	0		6.56042
Ppp1r12a	3.877e-10	6.751e-10	6.6582	6.9105	6.1375	6.9669	6.1272	0	0	0	0	0		6.56006
Ppp4r3a	6.098e-15	9.707e-14	6.5251	6.5759	6.6949	6.4128	6.5759	0	0	0	0	0		6.55692
Tp53bp1	1.157e-11	3.511e-11	6.3663	6.7905	6.5267	6.8505	6.246	0	0	0	0	0		6.556
Syngr3	1.818e-12	8.047e-12	6.4611	6.6767	6.2536	6.7931	6.5954	0	0	0	0	0		6.55598
Mrpl28	7.201e-10	1.166e-09	6.2346	6.9681	6.8367	6.7905	5.9495	0	0	0	0	0		6.55588
Ndufb11	8.548e-12	2.772e-11	10.854	10.662	10.419	10.598	10.416	4.3147	4.0356	3.9165	4.0356	3.8679		6.55574
Qser1	8.377e-10	1.337e-09	6.7576	6.1457	6.5094	6.1497	7.2104	0	0	0	0	0		6.55456
Selenom	2.985e-09	4.259e-09	6.4479	7.1839	6.4026	6.9093	5.8125	0	0	0	0	0		6.55124
Epha10	2.379e-13	1.608e-12	6.5744	6.7415	6.4246	6.6611	6.354	0	0	0	0	0		6.55112
Rpl39	3.46e-11	8.561e-11	6.7892	6.2153	6.4998	6.3237	6.9212	0	0	0	0	0		6.54984
Sparcl1	1.956e-11	5.371e-11	11.217	11.049	10.91	10.947	10.86	4.4263	4.5423	4.0618	4.717	4.4919		6.54874
ND1	1.325e-10	2.657e-10	6.0725	6.7931	6.4346	6.4446	6.9898	0	0	0	0	0		6.54692
Magi3	1.089e-13	8.895e-13	6.6921	6.4967	6.4246	6.6977	6.3923	0	0	0	0	0		6.54068
Trappc2	2.235e-12	9.426e-12	6.2649	6.7931	6.3837	6.5999	6.6554	0	0	0	0	0		6.5394
Npdc1	2.986e-09	4.259e-09	7.1477	6.1313	6.1977	6.1375	7.0757	0	0	0	0	0		6.53798
Sv2c	9.48e-14	8.003e-13	6.4998	6.5392	6.4094	6.7774	6.4561	0	0	0	0	0		6.53638
Slc25a42	7.945e-11	1.703e-10	6.2346	6.4643	6.4162	6.4479	7.1054	0	0	0	0	0		6.53368
Zfand6	1.006e-10	2.088e-10	6.6235	6.6767	6.5969	6.824	5.9402	0	0	0	0	0		6.53226
Arvcf	1.792e-12	7.978e-12	6.7252	6.4561	6.2441	6.4919	6.7401	0	0	0	0	0		6.53148
Atxn2l	6.942e-12	2.347e-11	12.164	11.987	12.061	12.091	11.922	5.3854	5.7469	5.225	5.7361	5.479		6.53052
Cyld	3.207e-11	8.024e-11	10.282	10.314	10.233	10.315	10.175	3.6893	3.5969	3.433	4.2095	3.7442		6.52922
Tprg1l	9.207e-12	2.94e-11	9.9738	10.245	10.295	10.351	9.9678	3.6781	3.8679	3.3785	3.6668	3.6088		6.5265
Tm9sf4	1.06e-11	3.276e-11	6.5622	6.9425	6.3452	6.4854	6.2873	0	0	0	0	0		6.52452
Letmd1	1.613e-13	1.196e-12	6.4611	6.6596	6.3255	6.4757	6.6949	0	0	0	0	0		6.52336
Eipr1	7.481e-11	1.621e-10	9.749	9.9375	10.065	10	9.674	3.2479	3.7334	2.9635	3.3923	3.4725		6.52318
Wdyhv1	2.151e-13	1.49e-12	6.7032	6.4529	6.6696	6.4611	6.3291	0	0	0	0	0		6.52318
Dact3	1.391e-08	1.791e-08	7.302	6.4757	6.479	6.7996	5.5577	0	0	0	0	0		6.5228
Psmd2	5.885e-10	9.738e-10	11.64	11.144	11.4	11.282	12.015	5.263	4.853	4.7225	4.797	5.2327		6.52256
Tgoln2	5.203e-12	1.852e-11	6.7252	6.7748	6.3129	6.5454	6.2517	0	0	0	0	0		6.522
Hook2	2.074e-11	5.645e-11	6.1558	6.4611	6.4919	6.9402	6.5531	0	0	0	0	0		6.52042
Pitpnm1	4.943e-11	1.139e-10	10.017	10.318	10.167	10.228	9.9269	3.3074	3.797	3.511	3.4854	3.9819		6.51484
Mrpl48	1.627e-08	2.075e-08	6.7469	7.1365	6.3906	6.8367	5.4561	0	0	0	0	0		6.51336
Trappc10	2.225e-12	9.402e-12	6.4479	6.8278	6.6029	6.4128	6.2724	0	0	0	0	0		6.51276
Ndufa13	6.363e-09	8.598e-09	10.781	10.488	10.247	10.706	9.5868	3.8379	3.4594	3.8074	3.8074	4.3434		6.51066
Dab2ip	6.447e-11	1.429e-10	10.303	10.247	10.023	10.103	9.9315	3.6554	3.511	4.0444	3.263	3.585		6.50974
Trmt1	8.595e-09	1.136e-08	6.8802	6.7682	6.5744	6.8605	5.4627	0	0	0	0	0		6.5092
Cyp2d22	9.219e-13	4.636e-12	6.5999	6.7748	6.2928	6.375	6.5014	0	0	0	0	0		6.50878
Gpm6b	1.377e-08	1.775e-08	12.731	12.35	12.663	12.441	13.763	6.5714	5.9565	6.1457	6.594	6.1375		6.50858
Mrps36	7.32e-09	9.774e-09	10.847	11.111	10.559	10.914	10.368	4.4594	3.3505	4.4195	4.5361	4.4919		6.50832
Saraf	2.108e-12	9.038e-12	6.8099	6.3906	6.2612	6.4725	6.6059	0	0	0	0	0		6.50802
Rpl5	1.547e-12	7.046e-12	11.236	11.426	11.273	11.35	11.1	4.6323	4.9819	4.7279	4.6206	4.8924		6.50598
Thoc7	2.449e-09	3.549e-09	6.1064	7.0509	6.7918	6.7374	5.8379	0	0	0	0	0		6.50488
Lmcd1	1.966e-09	2.897e-09	6.4741	6.7074	6.8035	6.8629	5.6554	0	0	0	0	0		6.50066
Lrrc8b	7.277e-11	1.587e-10	5.9284	6.6767	6.6795	6.5251	6.6935	0	0	0	0	0		6.50064
Clasp1	4.71e-11	1.098e-10	9.8173	9.7582	9.6564	9.7868	9.8677	3.3785	3.1699	3.278	2.8679	3.6893		6.50056
Znf207	3.043e-13	1.959e-12	6.4998	6.6352	6.5094	6.625	6.2269	0	0	0	0	0		6.49926
Myo9a	8.845e-13	4.485e-12	6.4346	6.7279	6.6381	6.4077	6.2593	0	0	0	0	0		6.49352
Chmp7	7.479e-13	3.93e-12	6.3663	6.5577	6.5668	6.7142	6.246	0	0	0	0	0		6.4902
Mrpl22	8.073e-10	1.294e-09	6.8304	6.89	6.3975	6.5283	5.7866	0	0	0	0	0		6.48656
Ovgp1	7.714e-09	1.026e-08	7.098	6.2891	6.1272	5.8125	7.1054	0	0	0	0	0		6.48644
Naga	3.181e-11	7.974e-11	6.5744	6.5577	6.3416	6.8691	6.079	0	0	0	0	0		6.48436
Exd2	4.173e-11	9.971e-11	6.8202	6.2095	6.1898	6.4009	6.7814	0	0	0	0	0		6.48036
Cacng2	8.318e-11	1.768e-10	5.9841	6.7905	6.5345	6.7455	6.3255	0	0	0	0	0		6.47602
Atad1	2.558e-12	1.048e-11	10.34	10.539	10.394	10.453	10.541	4.2705	4.0444	3.9727	3.8176	3.7866		6.47504
Pyurf	4.159e-08	5.069e-08	6.5744	7.1158	6.5969	6.8455	5.2365	0	0	0	0	0		6.47382
Trpv2	7.325e-14	6.652e-13	6.4346	6.4806	6.3837	6.354	6.7004	0	0	0	0	0		6.47066
Arhgap12	1.213e-09	1.861e-09	6.7252	6.8189	6.5298	6.6118	5.6639	0	0	0	0	0		6.46992
Cox6a1	2.387e-08	2.983e-08	11.339	11.614	11.172	11.438	10.44	4.8022	4.8875	5.1977	3.8777	4.8924		6.4691
Gatd1	4.402e-07	4.994e-07	8.0246	8.3505	8.0163	8.3092	7.1568	1.926	0	1.8074	2.1043	1.6781		6.46832
Rab6b	8.406e-10	1.34e-09	10.167	10.412	10.092	10.333	9.3213	3.5729	3.7334	3.6088	3.5236	3.5484		6.46764
Mars2	4.427e-09	6.131e-09	6.5999	6.394	6.1148	5.9069	7.3219	0	0	0	0	0		6.4675
Sars	4.912e-14	4.781e-13	12.493	12.546	12.529	12.553	12.632	6.2479	6.0067	5.9402	6.0896	6.1477		6.46418
Nubpl	4.919e-11	1.137e-10	6.8304	6.4967	6.5774	6.433	5.9796	0	0	0	0	0		6.46342
Xk	1.982e-11	5.428e-11	6.7892	6.4676	6.1799	6.1957	6.6809	0	0	0	0	0		6.46266
Mms19	7.384e-11	1.605e-10	6.6118	6.4313	6.1375	6.1957	6.9366	0	0	0	0	0		6.46258
Patl1	2.882e-11	7.409e-11	6.8405	6.4529	6.2983	6.625	6.0896	0	0	0	0	0		6.46126
Ppp2r5b	9.934e-10	1.563e-09	5.9472	6.9796	6.5999	6.7455	6.0334	0	0	0	0	0		6.46112
Pqbp1	2.899e-08	3.594e-08	6.6582	7.0213	6.3219	6.9715	5.3291	0	0	0	0	0		6.4604
Rps10	4.065e-11	9.752e-11	10.587	10.453	10.374	10.58	11.121	4.1699	4.225	4.121	4.2479	4.0618		6.45788
Elavl2	2.34e-12	9.761e-12	12.585	12.588	12.735	12.747	12.549	6.3273	6.4296	6.1739	5.9635	6.0639		6.44916
Fndc1	1.053e-07	1.246e-07	7.6286	5.8654	5.9819	5.797	6.9727	0	0	0	0	0		6.44912
Nat10	3.628e-10	6.359e-10	6.0201	6.8253	6.6073	6.7655	6.0246	0	0	0	0	0		6.44856
Rpa3	6.127e-13	3.377e-12	6.6696	6.4919	6.1859	6.3837	6.5062	0	0	0	0	0		6.44746
Pnp	1.299e-09	1.982e-09	6.7996	6.8654	6.2687	6.5774	5.7252	0	0	0	0	0		6.44726
Carmil1	4.745e-11	1.106e-10	6.9565	6.3381	6.4346	6.3716	6.1293	0	0	0	0	0		6.44602
Znf330	8.547e-10	1.361e-09	6.2498	6.89	6.4854	6.8022	5.7996	0	0	0	0	0		6.4454
Cdk9	3.937e-11	9.483e-11	6.1396	6.8099	6.4611	6.6554	6.1457	0	0	0	0	0		6.44234
Arhgef17	1.31e-09	1.997e-09	7.2192	6.2517	6.2891	6.4512	5.9887	0	0	0	0	0		6.43998
Irf2bpl	7.645e-13	4.008e-12	6.2798	6.4611	6.5407	6.6795	6.2384	0	0	0	0	0		6.4399
Begain	1.418e-09	2.15e-09	10.595	10.133	9.9338	10.051	9.8762	3.5607	3.8278	3.0875	4.009	3.9355		6.4337
Rpl18	6.632e-09	8.925e-09	10.411	10.257	10.521	10.372	11.244	4.4128	3.8278	4.6668	3.6554	4.079		6.43264
Lmtk3	3.303e-10	5.865e-10	6.3092	6.8777	6.394	6.7087	5.8654	0	0	0	0	0		6.431
Golga5	1.169e-10	2.383e-10	5.8505	6.6837	6.6879	6.503	6.4296	0	0	0	0	0		6.43094
Rsph14	3.018e-11	7.661e-11	6.4479	6.7211	6.6162	6.4009	5.9658	0	0	0	0	0		6.43038
Tldc1	3.16e-09	4.483e-09	6.7892	6.8215	6.1799	6.732	5.6264	0	0	0	0	0		6.4298
Mrpl19	1.309e-10	2.627e-10	6.4998	6.6162	6.6323	6.5835	5.8125	0	0	0	0	0		6.42886
Sh3gl1	4.617e-11	1.083e-10	12.488	12.76	12.491	12.627	12.111	6.2133	5.8074	6.1579	6.225	5.9402		6.42664
Hoxa2	5.059e-10	8.542e-10	6.7252	6.0682	6.3681	6.009	6.9612	0	0	0	0	0		6.42634
Trappc8	5.308e-09	7.268e-09	9.0135	9.2303	9.1992	9.138	9.2223	3.1043	2.8679	3.278	2.5607	1.8875		6.42098
Wwc1	4.152e-10	7.167e-10	6.2649	6.6162	6.0575	7.0246	6.1252	0	0	0	0	0		6.41768
Wdr11	1.636e-12	7.369e-12	6.5125	6.6837	6.4463	6.2687	6.1759	0	0	0	0	0		6.41742
Pcdhac2	2.498e-11	6.574e-11	6.3802	6.394	6.1538	6.2649	6.8912	0	0	0	0	0		6.41682
Serpina3k	6.854e-08	8.214e-08	10.611	10.601	10.644	10.752	10.22	5.0045	3.1699	4.1619	4.7004	3.7115		6.41596
Kcnb2	6.683e-14	6.207e-13	6.2498	6.4643	6.5969	6.3201	6.438	0	0	0	0	0		6.41382
Nova2	2.592e-10	4.753e-10	11.725	12.052	11.977	12.075	11.255	5.466	5.4162	5.6206	5.3327	5.1898		6.41174
Ube4a	7.481e-13	3.93e-12	6.6352	6.5078	6.2192	6.2288	6.4627	0	0	0	0	0		6.41074
Washc5	1.037e-12	5.101e-12	6.2036	6.6767	6.3219	6.5283	6.3201	0	0	0	0	0		6.41012
Wdr41	5.907e-11	1.329e-10	6.5999	6.7576	6.2192	6.503	5.9704	0	0	0	0	0		6.41002
Mccc1	2.262e-12	9.519e-12	10.734	10.58	10.451	10.443	10.269	3.926	4.0618	4.0444	4.1699	4.225		6.40998
Dmxl2	3.213e-10	5.732e-10	13.24	13.022	13.221	13.081	13.803	7.1568	6.9437	6.5653	6.9623	6.6949		6.4088
Gpd1l	2.356e-11	6.284e-11	13.35	13.438	13.661	13.498	13.862	7.1799	7.2983	6.8202	7.2715	7.2036		6.4071
Srsf6	8.594e-11	1.817e-10	6.9284	6.1001	6.2479	6.2327	6.5157	0	0	0	0	0		6.40496
Ephx1	4.986e-06	5.455e-06	8.8019	8.6319	8.6514	8.5519	8.8915	2.3785	0	3.2172	2.8074	3.1043		6.40424
Gss	3.254e-10	5.794e-10	10.673	10.853	10.713	10.781	10.066	4.1043	4.5789	4.121	3.991	4.2705		6.40406
Sec16a	3.233e-12	1.258e-11	6.0201	6.4229	6.4919	6.5622	6.503	0	0	0	0	0		6.40002
Eif4a2	2.646e-09	3.812e-09	12.455	12.079	12.142	12.095	12.941	6.1106	5.3889	6.3165	6.0135	5.8851		6.39948
Clstn3	1.244e-17	1.24e-15	6.3523	6.3768	6.4741	6.3906	6.4009	0	0	0	0	0		6.39894
Lgi3	3.99e-10	6.92e-10	6.5376	6.8125	6.302	6.5774	5.7629	0	0	0	0	0		6.39848
Enpp5	2.325e-13	1.592e-12	6.4212	6.5188	6.1375	6.3802	6.5204	0	0	0	0	0		6.39562
Erlin2	6.088e-13	3.362e-12	12.572	12.426	12.413	12.407	12.352	6.029	6.2593	5.8176	6.0531	6.0444		6.39332
Arf5	2.628e-10	4.81e-10	10.104	10.026	10.005	10.049	10.755	4.0444	3.9635	3.5607	3.7442	3.6668		6.39188
Adgrl1	1.146e-09	1.772e-09	10.055	10.184	9.9738	10.126	9.6259	3.9165	3.8074	3.3074	3.926	3.0531		6.39086
Csnk1d	9.331e-10	1.476e-09	6.4611	6.7184	6.4279	6.7087	5.6352	0	0	0	0	0		6.39026
Mib1	2.892e-09	4.134e-09	7.1064	6.5759	6.0917	6.4229	5.7522	0	0	0	0	0		6.38982
Dmxl2	3.593e-10	6.309e-10	13.218	12.997	13.202	13.056	13.791	7.1568	6.9437	6.5653	6.9623	6.6949		6.3882
Grip1	3.081e-08	3.811e-08	6.0201	7.1518	6.5204	6.8342	5.406	0	0	0	0	0		6.3865
Smc1a	5.88e-10	9.733e-10	10.04	10.259	9.9238	10.067	9.3269	3.6206	3.4594	3.3646	3.8875	3.3646		6.384
Hmgn3	1.091e-07	1.289e-07	7.5006	5.9189	5.9612	5.5789	6.9577	0	0	0	0	0		6.38346
Dhx38	7.176e-12	2.408e-11	6.7576	6.3854	6.223	6.4077	6.1293	0	0	0	0	0		6.3806
Tsc2	2.199e-12	9.334e-12	6.1231	6.6767	6.2612	6.4009	6.4346	0	0	0	0	0		6.3793
Slc8a1	4.52e-10	7.741e-10	10.638	10.654	10.749	10.785	10.991	5.0356	4.2928	4.0444	4.278	4.2705		6.37914
Ppp1r8	7.901e-11	1.695e-10	6.2649	6.6453	6.4919	6.625	5.8654	0	0	0	0	0		6.3785
Uggt1	5.401e-12	1.911e-11	11.182	11.226	11.015	11.151	10.853	4.706	4.5298	4.8679	4.8972	4.5361		6.378
Rbbp5	4.087e-09	5.696e-09	7.1064	6.5804	6.3056	6.2536	5.641	0	0	0	0	0		6.3774
Dnajc7	8.555e-12	2.772e-11	9.8665	10.162	9.9917	10.012	9.767	3.5484	3.848	3.7115	3.406	3.406		6.37586
Pitrm1	3.257e-11	8.13e-11	10.116	10.275	10.251	10.266	10.176	3.5236	3.8679	4.0356	4.1859	3.5969		6.37482
Stx16	9.772e-10	1.539e-09	6.8099	6.4643	6.3611	6.5999	5.6381	0	0	0	0	0		6.37466
Zfp365	4.782e-10	8.113e-10	6.3523	6.9425	6.3291	6.4446	5.7996	0	0	0	0	0		6.37362
Chmp6	2.045e-10	3.869e-10	6.4741	6.6767	6.4741	6.4951	5.7361	0	0	0	0	0		6.37122
Mlst8	4.719e-10	8.025e-10	6.8802	6.4363	6.3872	6.4009	5.7442	0	0	0	0	0		6.36976
Atl1	2.9e-10	5.228e-10	11.665	11.464	11.605	11.511	12.263	5.3785	5.6118	5.1579	5.3992	5.1127		6.36958
Hmgb1	2.323e-09	3.381e-09	14.149	13.3	13.238	12.984	13.054	6.9565	7.264	6.8765	6.8875	6.9021		6.36768
Dnajb3	1.694e-09	2.529e-09	6.0553	6.7616	6.4496	6.848	5.7225	0	0	0	0	0		6.3674
Myg1	6.483e-10	1.06e-09	6.2649	6.6837	6.5546	6.6554	5.6724	0	0	0	0	0		6.3662
Snx1	1.727e-10	3.346e-10	11.24	11.509	11.467	11.503	11.275	5.1169	5.2891	4.843	4.5607	5.3646		6.36394
Brd3os	8.759e-11	1.85e-10	6.3663	6.7509	6.4822	6.3716	5.848	0	0	0	0	0		6.3638
Nub1	2.699e-10	4.914e-10	6.5744	6.5046	6.5062	6.5392	5.6893	0	0	0	0	0		6.36274
NOGENE	2.474e-09	3.582e-09	14.147	13.291	13.23	12.972	13.043	6.9565	7.264	6.8765	6.8875	6.9021		6.35928
Smad2	2.682e-12	1.088e-11	6.6809	6.1819	6.3129	6.1719	6.4429	0	0	0	0	0		6.3581
Tcerg1	7.083e-10	1.149e-09	10.284	9.9965	9.8939	9.938	9.6053	3.8777	3.7115	3.0179	3.4983	3.8278		6.3569
Nutf2	5.125e-10	8.628e-10	11.082	11.476	11.381	11.418	10.743	4.991	5.2055	4.5423	4.6439	4.9402		6.35542
Wdr91	1.484e-13	1.117e-12	6.1719	6.2798	6.5125	6.3129	6.4998	0	0	0	0	0		6.35538
Ppp1r11	2.087e-10	3.938e-10	6.5622	6.6308	6.2743	6.5577	5.7495	0	0	0	0	0		6.3549
8030462N17Rik	1.096e-09	1.706e-09	6.9284	6.2479	6.1231	5.7918	6.6668	0	0	0	0	0		6.3516
Bbip1	5.071e-08	6.136e-08	6.4479	6.9284	6.5969	6.7004	5.0832	0	0	0	0	0		6.35136
Slitrk5	4.33e-10	7.449e-10	6.3237	6.8253	6.2817	6.5683	5.7495	0	0	0	0	0		6.3497
Palm2	7.336e-12	2.448e-11	10.924	10.698	10.719	10.666	11.033	4.6029	4.5789	4.4463	4.5046	4.1619		6.34908
Pea15	1.048e-10	2.159e-10	13.139	12.605	13.095	12.883	13.43	6.6907	6.7197	6.4643	6.8202	6.7184		6.34774
Nkap	1.644e-10	3.201e-10	6.1064	6.7115	5.8875	6.3681	6.6611	0	0	0	0	0		6.34692
Api5	1.16e-11	3.518e-11	10.826	10.949	10.865	10.873	10.935	4.3646	4.9165	4.406	4.6837	4.3505		6.34534
Pag1	6.953e-11	1.524e-10	6.5744	6.6279	6.1599	6.479	5.8777	0	0	0	0	0		6.34378
Nptx1	4.462e-12	1.626e-11	10.853	10.901	10.937	10.927	10.952	4.706	4.1938	4.6837	4.7225	4.5546		6.34188
Pld3	1.359e-12	6.329e-12	9.7477	9.8181	9.8286	9.843	9.5943	3.2479	3.6439	3.3363	3.3505	3.5484		6.34094
Wtap	6.258e-10	1.028e-09	6.2498	6.7279	6.3611	6.6767	5.6865	0	0	0	0	0		6.3404
Rprd1a	3.307e-10	5.87e-10	6.588	6.5078	6.5438	6.4009	5.6611	0	0	0	0	0		6.34032
Arnt2	2.038e-18	5.583e-16	6.394	6.2983	6.3487	6.3345	6.3183	0	0	0	0	0		6.33876
Etl4	2.304e-10	4.278e-10	11.972	11.9	11.901	11.997	11.528	5.4162	5.9658	5.706	5.3576	5.1619		6.3381
NOGENE	1.926e-11	5.304e-11	6.6582	6.0896	6.5438	6.347	6.0466	0	0	0	0	0		6.33704
Dgkq	1.504e-09	2.268e-09	6.5376	5.926	6.3092	5.8924	7.0179	0	0	0	0	0		6.33662
Mbd2	1.915e-13	1.353e-12	6.5125	6.2946	6.4212	6.3345	6.1085	0	0	0	0	0		6.33426
Naa20	5.363e-09	7.34e-09	6.2192	6.9307	6.406	6.6308	5.4757	0	0	0	0	0		6.33248
Fam210b	7.037e-11	1.539e-10	6.4346	6.121	6.0246	6.246	6.8278	0	0	0	0	0		6.3308
Dap3	2.546e-09	3.678e-09	6.1719	6.6977	6.5062	6.7374	5.5329	0	0	0	0	0		6.32922
Tmcc2	1.865e-08	2.361e-08	7.2498	6.5683	6.1799	6.1416	5.5046	0	0	0	0	0		6.32884
Cmip	9.743e-12	3.074e-11	6.4077	6.4313	6.4951	6.4195	5.89	0	0	0	0	0		6.32872
Plekho1	2.845e-09	4.073e-09	6.7142	6.8215	6.1538	6.3872	5.5577	0	0	0	0	0		6.32688
Chchd7	1.022e-08	1.342e-08	6.3092	6.7482	6.5577	6.6977	5.3074	0	0	0	0	0		6.32404
Farsb	7.503e-14	6.738e-13	11.617	11.705	11.705	11.67	11.849	5.2172	5.4026	5.3957	5.4195	5.4983		6.32254
Esyt1	1.182e-10	2.404e-10	6.89	6.0682	6.2114	6.0832	6.3576	0	0	0	0	0		6.32208
Pkig	6.937e-13	3.715e-12	6.5376	6.4111	6.1106	6.3802	6.1679	0	0	0	0	0		6.32148
Ubr3	3.527e-13	2.2e-12	6.4479	6.4998	6.2075	6.3416	6.1085	0	0	0	0	0		6.32106
Fam92a	5.409e-11	1.233e-10	6.394	6.4967	6.4212	6.5094	5.7787	0	0	0	0	0		6.32
Rpl5	4.611e-12	1.674e-11	11.001	11.28	11.102	11.188	10.876	4.6323	4.9819	4.7279	4.6206	4.8924		6.31838
Lrrtm3	2.225e-10	4.154e-10	6.9093	6.2612	5.9189	6.1659	6.3345	0	0	0	0	0		6.31796
Mum1	1.008e-10	2.091e-10	6.2346	6.6235	6.4246	6.5157	5.7814	0	0	0	0	0		6.31596
Bckdk	2.24e-10	4.175e-10	6.6118	6.6308	6.2649	6.3074	5.7279	0	0	0	0	0		6.30856
Fut8	5.119e-11	1.175e-10	6.3523	6.4229	6.4741	6.5094	5.7735	0	0	0	0	0		6.30644
Fabp3	5.88e-11	1.325e-10	14.174	13.595	13.653	13.686	14.1	7.5141	7.5954	7.5259	7.3264	7.7252		6.3042
Rbx1	3.476e-07	3.972e-07	6.4741	7.1293	6.0112	7.0477	4.858	0	0	0	0	0		6.30406
Farsb	6.96e-14	6.397e-13	11.606	11.682	11.688	11.646	11.828	5.2172	5.4026	5.3957	5.4195	5.4983		6.30334
Tenm1	2.218e-12	9.385e-12	6.3802	6.5577	6.0201	6.3681	6.1898	0	0	0	0	0		6.30318
Ccdc47	2.108e-09	3.089e-09	6.0023	6.853	6.5744	6.4512	5.6323	0	0	0	0	0		6.30264
Rps5	2.28e-07	2.634e-07	8.6169	8.7122	8.9369	8.7928	9.6242	3.511	2.6323	1.3785	2.926	2.7225		6.30254
Stx8	3.251e-11	8.119e-11	6.4479	6.5546	6.0045	6.5251	5.9773	0	0	0	0	0		6.30188
Cox7a2l	5.264e-10	8.83e-10	6.0896	6.0639	6.1679	7.0246	6.1619	0	0	0	0	0		6.30158
Itgb1bp1	3.11e-11	7.827e-11	6.3663	6.4446	6.1859	6.6191	5.8704	0	0	0	0	0		6.29726
Dcun1d3	5.735e-10	9.517e-10	6.6921	6.0201	6.0201	5.9519	6.7931	0	0	0	0	0		6.29546
Gad1	1.983e-11	5.429e-11	10.836	10.805	10.939	10.765	11.308	4.7549	4.6668	4.8022	4.5173	4.4396		6.29444
Fbxl18	1.534e-11	4.435e-11	5.9472	6.5607	6.1416	6.2891	6.5329	0	0	0	0	0		6.2943
Smg9	4.291e-11	1.021e-10	6.3237	6.7211	6.0875	6.3872	5.9519	0	0	0	0	0		6.29428
Gm11397	3.264e-17	2.43e-15	6.3237	6.3255	6.2114	6.3273	6.2705	0	0	0	0	0		6.29168
Micu3	1.683e-09	2.516e-09	6.55	6.0312	5.7306	6.1918	6.9425	0	0	0	0	0		6.28922
Coa7	5.702e-13	3.2e-12	10.815	10.926	10.85	10.876	10.605	4.5236	4.5173	4.3434	4.5789	4.6724		6.28728
Nae1	2.508e-09	3.627e-09	9.5842	9.6726	9.6295	9.6033	9.6958	3.1375	2.7442	3.5729	3.2479	4.0531		6.28596
[truncated: 3,131 more rows]

## Sheet: H-S
	p value	q value	Hippocampus	Hippocampus	Hippocampus	Hippocampus	Hippocampus	Straitum	Straitum	Straitum	Straitum	Straitum		Fold of Change
Atp1a4	1.211e-14	6.754e-13	10.207	10.37	10.313	10.431	10.678	0	0	0	0	0		10.3998
Map4	1.407e-13	4.272e-12	10.334	9.8768	9.9471	10.235	9.8083	0	0	0	0	0		10.0402
Cpne6	5.139e-16	1.045e-13	8.6682	8.9087	8.7797	8.8332	8.9084	0	0	0	0	0		8.81964
Ppp1r12c	2.104e-14	1.025e-12	8.3161	8.121	8.0362	8.1324	7.9147	0	0	0	0	0		8.10408
Shank1	4.214e-14	1.767e-12	7.5046	7.6475	7.5969	7.8741	7.5094	0	0	0	0	0		7.6265
Shank1	4.214e-14	1.767e-12	7.5046	7.6475	7.5969	7.8741	7.5094	0	0	0	0	0		7.6265
Mat2b	2.565e-15	2.51e-13	7.6073	7.4279	7.6402	7.4187	7.5895	0	0	0	0	0		7.53672
Ncam1	3.619e-11	3.765e-10	10.63	10.748	10.848	10.607	10.997	3.6893	3.2928	2.926	3.4463	3.0531		7.4845
Sphkap	1.781e-16	5.23e-14	7.5094	7.4136	7.5094	7.3478	7.3802	0	0	0	0	0		7.43208
Try10	2.107e-10	1.787e-09	7.0279	7.1272	7.2384	8.0715	7.5947	0	0	0	0	0		7.41194
Hspa1b	3.9e-15	3.403e-13	7.4733	7.2687	7.3237	7.5306	7.3531	0	0	0	0	0		7.38988
Tpm3	6.453e-13	1.433e-11	7.2583	7.3443	7.2279	7.3147	7.734	0	0	0	0	0		7.37584
Hist1h2bk	4.696e-12	6.618e-11	7.4725	7.4553	7.529	7.1313	6.9296	0	0	0	0	0		7.30354
Ppm1e	5.556e-14	2.143e-12	7.3255	7.0101	7.1878	7.3957	7.2696	0	0	0	0	0		7.23774
Mic13	6.405e-10	4.906e-09	7.225	6.4077	7.4321	7.6632	7.3138	0	0	0	0	0		7.20836
Pcyt1b	1.361e-11	1.606e-10	6.8405	7.2937	6.9057	7.5523	7.1064	0	0	0	0	0		7.13972
Yjefn3	1.078e-18	1.898e-15	7.1221	7.0928	7.1426	7.121	7.0455	0	0	0	0	0		7.1048
Syt7	3.96e-15	3.403e-13	6.946	7.1759	7.2016	7.0498	7.1385	0	0	0	0	0		7.10236
Slc9a3r2	6.388e-14	2.345e-12	7.0498	7.2172	7.2104	7.0466	6.858	0	0	0	0	0		7.0764
Ywhaz	1.82e-08	1.026e-07	11.236	11.132	11.238	11.117	11.288	4.4263	4.8329	4.7655	3.8777	3.1538		6.99096
Sec24c	1.902e-15	2.21e-13	6.9224	7.1334	6.9224	6.9165	7.0112	0	0	0	0	0		6.98118
Hmgb2	7.988e-16	1.242e-13	6.8814	6.8654	7.0531	7.0257	6.9692	0	0	0	0	0		6.95896
Hmgl6	7.988e-16	1.242e-13	6.8814	6.8654	7.0531	7.0257	6.9692	0	0	0	0	0		6.95896
Apoa2	7.684e-11	7.2e-10	6.9495	7.0639	7.1589	7.04	6.2891	0	0	0	0	0		6.90028
Chgb	3.992e-15	3.403e-13	6.8542	6.7562	6.8839	7.0367	6.8555	0	0	0	0	0		6.8773
Tnc	6.184e-14	2.306e-12	7.0575	6.6724	6.8555	6.7983	6.9165	0	0	0	0	0		6.86004
Ufc1	9.542e-15	5.777e-13	6.7774	6.8505	6.9853	6.7905	6.6809	0	0	0	0	0		6.81692
Palmd	1.099e-13	3.457e-12	6.7074	6.8163	6.6381	6.6921	7.019	0	0	0	0	0		6.77458
Tnks1bp1	7.253e-13	1.565e-11	6.7576	6.7361	6.7087	7.0864	6.5668	0	0	0	0	0		6.77112
Dlgap1	5.641e-16	1.059e-13	6.8342	6.853	6.7853	6.6738	6.7074	0	0	0	0	0		6.77074
Actbl2	9.81e-10	7.241e-09	11.122	11.04	11.042	11.153	10.919	4.0268	3.8278	5.0268	4.2172	4.4463		6.74622
Stim2	4.142e-11	4.234e-10	6.2269	7.0112	6.7616	6.7087	6.9875	0	0	0	0	0		6.73918
Snx27	9.36e-14	3.092e-12	6.7918	6.7589	6.8691	6.4806	6.7522	0	0	0	0	0		6.73052
Acap2	1.966e-14	9.99e-13	6.6949	6.7642	6.5329	6.8342	6.8112	0	0	0	0	0		6.72748
Polr2a	2.758e-12	4.364e-11	6.4643	6.4806	6.7101	6.8605	6.9658	0	0	0	0	0		6.69626
B2m	5.351e-13	1.246e-11	6.671	6.8716	6.6424	6.7293	6.375	0	0	0	0	0		6.65786
Osgin2	5.989e-07	2.516e-06	8.5098	6.1739	6.3487	5.9681	6.246	0	0	0	0	0		6.6493
Ppp3ca	1.566e-10	1.375e-09	11.029	10.911	10.964	10.747	11.021	4.7549	4.1127	3.8972	4.585	4.3716		6.59012
Pnmal2	4.14e-13	1.018e-11	6.7774	6.6795	6.6511	6.4094	6.3872	0	0	0	0	0		6.58092
Rpp14	1.019e-15	1.381e-13	6.6525	6.5345	6.4741	6.5531	6.6668	0	0	0	0	0		6.5762
Cc2d1a	4.084e-09	2.632e-08	7.5062	6.1477	6.3074	6.3663	6.3872	0	0	0	0	0		6.54296
Atp2a3	1.01e-12	2.037e-11	6.4429	6.4529	6.6395	6.3165	6.8074	0	0	0	0	0		6.53184
Sipa1l3	1.215e-12	2.335e-11	6.5329	6.5592	6.5251	6.7905	6.2365	0	0	0	0	0		6.52884
Krt90	1.104e-05	3.628e-05	7.9756	4.7918	7.5054	4.9819	7.3452	0	0	0	0	0		6.51998
Ftl1	6.24e-11	6.044e-10	6.5298	6.2854	6.4676	6.8151	5.9588	0	0	0	0	0		6.41134
Scg5	5.279e-12	7.278e-11	6.1898	6.4529	6.3716	6.7708	6.2269	0	0	0	0	0		6.4024
Gabbr2	1.385e-10	1.224e-09	6.8342	6.4806	5.9932	6.0704	6.5329	0	0	0	0	0		6.38226
NOGENE	2.223e-09	1.526e-08	10.217	10.314	10.531	10.068	9.8851	3.1859	4.3785	3.8679	3.9449	3.7866		6.37026
Ociad2	3.169e-12	4.862e-11	6.5999	6.1997	6.1127	6.5469	6.2724	0	0	0	0	0		6.34632
Vmn1r215	2.41e-12	3.948e-11	6.2854	6.1064	6.0832	6.5531	6.4496	0	0	0	0	0		6.29554
Immt	1.785e-13	5.2e-12	10.454	10.487	10.478	10.433	10.414	4.1538	4.2479	4.0959	4.3646	3.9819		6.28438
Wdr48	6.165e-13	1.392e-11	6.1396	6.0466	6.3906	6.4026	6.4195	0	0	0	0	0		6.27978
Ppp3cc	1.468e-13	4.434e-12	6.4496	6.0575	6.2946	6.3001	6.1957	0	0	0	0	0		6.2595
Hmox2	1.767e-12	3.145e-11	6.0378	6.4145	6.0682	6.4741	6.2817	0	0	0	0	0		6.25526
Ccdc177	4.544e-11	4.591e-10	6.4009	6.3681	6.0246	6.5046	5.8022	0	0	0	0	0		6.22008
Samm50	2.963e-11	3.163e-10	6.009	6.6753	5.9977	6.278	6.1293	0	0	0	0	0		6.21786
Gyg	1.588e-13	4.69e-12	6.1977	6.4043	6.1957	6.2555	6	0	0	0	0	0		6.21064
Emc10	1.513e-11	1.759e-10	6.5204	6.1064	6.1436	6.3716	5.8555	0	0	0	0	0		6.1995
Trappc3	3.323e-13	8.568e-12	6.0488	6.394	6.0875	6.3291	6.0938	0	0	0	0	0		6.19064
Rab11fip5	6.956e-13	1.507e-11	5.9425	6.3576	5.9612	6.1898	6.098	0	0	0	0	0		6.10982
Dnajb1	4.68e-11	4.72e-10	5.9117	5.8948	6.2133	5.7629	6.4741	0	0	0	0	0		6.05136
Chga	7.291e-15	4.817e-13	5.9704	6.1619	5.926	6.1022	6.0224	0	0	0	0	0		6.03658
Rpl21	1.582e-10	1.384e-09	5.5699	6.1022	6.0488	5.9021	6.4919	0	0	0	0	0		6.02298
Rpl21	1.582e-10	1.384e-09	5.5699	6.1022	6.0488	5.9021	6.4919	0	0	0	0	0		6.02298
Slc30a9	1.343e-12	2.536e-11	5.9542	6.2946	6.0135	5.8875	5.8202	0	0	0	0	0		5.994
Tmpo	8.324e-15	5.18e-13	6.0045	6.1148	5.8455	5.975	5.9588	0	0	0	0	0		5.97972
Tmpo	8.324e-15	5.18e-13	6.0045	6.1148	5.8455	5.975	5.9588	0	0	0	0	0		5.97972
NOGENE	2.698e-11	2.91e-10	5.7225	6.2192	5.7388	5.9093	6.2891	0	0	0	0	0		5.97578
Try5	5.02e-10	3.937e-09	5.6781	5.6753	5.7522	6.5188	6.2269	0	0	0	0	0		5.97026
Msrb2	5.633e-13	1.294e-11	5.8802	5.8851	5.8354	5.9887	6.2403	0	0	0	0	0		5.96594
Luzp1	3.415e-12	5.156e-11	5.8802	6.1619	5.9727	5.6525	6.1189	0	0	0	0	0		5.95724
Tanc2	1.665e-12	3e-11	5.6611	5.843	6.1457	5.9887	6.0224	0	0	0	0	0		5.93218
Plxna4	2.251e-12	3.788e-11	5.7866	5.991	5.9841	5.7032	6.1957	0	0	0	0	0		5.93212
Tomm34	1.282e-11	1.523e-10	5.8022	5.7787	5.7334	5.8875	6.3201	0	0	0	0	0		5.90438
Mlst8	6.322e-13	1.422e-11	5.7225	5.7388	5.8972	6.1272	5.9021	0	0	0	0	0		5.87756
Anxa11	8.773e-13	1.816e-11	5.797	5.9542	5.9841	5.6088	6.0179	0	0	0	0	0		5.8724
Lamp2	2.75e-13	7.229e-12	5.717	5.858	5.7388	5.7708	6.0747	0	0	0	0	0		5.83186
Katnal1	9.286e-12	1.155e-10	5.9704	5.8948	5.9236	5.8948	5.4195	0	0	0	0	0		5.82062
F3	5.807e-13	1.328e-11	5.6668	6.0488	5.7761	5.6865	5.9021	0	0	0	0	0		5.81606
Immt	3.597e-13	9.183e-12	9.9358	9.9581	9.9857	9.95	9.8959	4.1538	4.2479	4.0959	4.3646	3.9819		5.77628
Arhgap12	3.307e-10	2.708e-09	6.0938	5.5141	5.9141	6.029	5.2854	0	0	0	0	0		5.76728
Iqgap2	2.063e-12	3.54e-11	5.9021	5.479	5.6639	5.9021	5.8555	0	0	0	0	0		5.76052
Cpne7	3.823e-10	3.089e-09	5.4229	5.706	5.4195	5.9236	6.2593	0	0	0	0	0		5.74626
Acsl3	2.583e-13	6.925e-12	5.5699	5.6264	5.8851	5.7115	5.8728	0	0	0	0	0		5.73314
Ampd2	1.829e-13	5.282e-12	5.9117	5.5729	5.8176	5.6352	5.7252	0	0	0	0	0		5.73252
Emp2	3.324e-14	1.44e-12	5.843	5.585	5.6582	5.6177	5.7761	0	0	0	0	0		5.696
Fxn	2.648e-11	2.866e-10	5.8253	5.7892	5.6893	5.9093	5.2668	0	0	0	0	0		5.69598
Sec14l2	1.178e-15	1.519e-13	5.7522	5.7388	5.717	5.6264	5.591	0	0	0	0	0		5.68508
Mtdh	1.63e-09	1.144e-08	5.04	5.6088	5.9021	5.5423	6.1579	0	0	0	0	0		5.65022
Mtdh	1.63e-09	1.144e-08	5.04	5.6088	5.9021	5.5423	6.1579	0	0	0	0	0		5.65022
Matn4	1.162e-10	1.047e-09	5.717	5.3074	6.0488	5.382	5.7522	0	0	0	0	0		5.64148
Mecp2	2.803e-09	1.866e-08	5.717	5.858	5.8455	4.848	5.9307	0	0	0	0	0		5.63984
Vps13c	4.134e-07	1.797e-06	4.926	4.9307	5.2891	6.8455	6.1719	0	0	0	0	0		5.63264
Camsap1	4.798e-13	1.137e-11	5.6921	5.5546	5.4919	5.858	5.5267	0	0	0	0	0		5.62466
Vars	7.171e-12	9.357e-11	5.347	5.3398	5.7814	5.5423	5.7388	0	0	0	0	0		5.54986
Vars	7.171e-12	9.357e-11	5.347	5.3398	5.7814	5.5423	5.7388	0	0	0	0	0		5.54986
Rab9b	2.502e-12	4.044e-11	5.5236	5.6352	5.2668	5.7629	5.5267	0	0	0	0	0		5.54304
Epb41l3	4.718e-10	3.727e-09	8.8524	9.002	8.9393	8.8731	9.1704	3.5607	3.4854	3.433	2.9449	3.848		5.51304
Eny2	3.81e-12	5.657e-11	5.278	5.3681	5.7142	5.466	5.6809	0	0	0	0	0		5.50144
Fmn2	2.779e-11	2.986e-10	5.2441	5.5329	5.3147	5.4757	5.8728	0	0	0	0	0		5.48804
Nav1	2.053e-15	2.308e-13	5.5969	5.3889	5.4692	5.4854	5.4725	0	0	0	0	0		5.48258
Cdc42bpa	6.876e-11	6.514e-10	5.3111	5.4886	5.9021	5.1779	5.5267	0	0	0	0	0		5.48128
Ttc9b	3.007e-11	3.198e-10	5.6118	5.4195	5.354	5.7469	5.1085	0	0	0	0	0		5.44814
Syn2	2.239e-10	1.896e-09	10.11	10.02	9.9763	10.203	9.9037	4.7279	4.263	4.3716	4.9117	4.853		5.41716
Mpdz	4.711e-12	6.622e-11	5.2016	5.3611	5.2817	5.4128	5.706	0	0	0	0	0		5.39264
Ccdc88a	1.125e-11	1.361e-10	5.6352	5.4463	5.354	5.4463	5.0488	0	0	0	0	0		5.38612
Ablim3	6.859e-14	2.5e-12	5.5298	5.278	5.2817	5.3611	5.4725	0	0	0	0	0		5.38462
Babam1	5.519e-11	5.407e-10	5.4229	5.479	5.4429	5.6352	4.9402	0	0	0	0	0		5.38404
Fmnl2	1.168e-11	1.406e-10	5.7469	5.2211	5.2403	5.4026	5.3038	0	0	0	0	0		5.38294
Nptxr	4.993e-10	3.921e-09	4.926	5.4396	5.3219	5.8875	5.3111	0	0	0	0	0		5.37722
Rasgrf1	7.211e-12	9.387e-11	5.3255	5.6865	5.121	5.3716	5.3716	0	0	0	0	0		5.37524
Traf3	1.516e-12	2.763e-11	5.1416	5.3681	5.3576	5.3716	5.6118	0	0	0	0	0		5.37014
Anxa2	2.406e-12	3.948e-11	5.1739	5.591	5.2965	5.2365	5.4886	0	0	0	0	0		5.3573
Gldc	5.201e-13	1.222e-11	5.2705	5.2327	5.3957	5.5699	5.2327	0	0	0	0	0		5.3403
mKIAA1042	4.823e-12	6.743e-11	5.2928	5.5607	5.4951	5.1659	5.1375	0	0	0	0	0		5.3304
Rb1	1.059e-09	7.668e-09	4.926	4.9955	5.263	5.6352	5.7655	0	0	0	0	0		5.31704
Lysmd1	2.475e-11	2.723e-10	5.4162	5.3889	5.2288	5.5699	4.9542	0	0	0	0	0		5.3116
Bola2	3.374e-12	5.125e-11	5.2668	5.5454	5.1859	5.3923	5.079	0	0	0	0	0		5.29388
Chchd3	2.322e-11	2.588e-10	9.6025	9.5714	9.6142	9.6546	9.7173	4.4195	4.4396	4.6029	4.2095	4.0268		5.29234
Grin2a	4.996e-11	4.936e-10	5.6496	5.0531	5.2479	5.0618	5.4263	0	0	0	0	0		5.28774
Ube3a	2.776e-10	2.296e-09	4.853	5.3255	5.3147	5.0875	5.6949	0	0	0	0	0		5.25512
Sfxn5	8.523e-14	2.944e-12	5.2705	5.382	5.0747	5.2365	5.3038	0	0	0	0	0		5.2535
Ubxn4	5.876e-12	7.963e-11	5.0661	5.3681	5.2365	5.4951	5.0488	0	0	0	0	0		5.24292
Tbcc	3.433e-13	8.808e-12	5.0488	5.2854	5.4195	5.2016	5.2211	0	0	0	0	0		5.23528
Slitrk5	2.522e-12	4.063e-11	5.3111	5.121	5.1659	5.466	5.0268	0	0	0	0	0		5.21816
Ca4	8.959e-10	6.659e-09	4.7388	5.3398	4.9402	5.225	5.6611	0	0	0	0	0		5.18098
Car4	8.959e-10	6.659e-09	4.7388	5.3398	4.9402	5.225	5.6611	0	0	0	0	0		5.18098
Kif3c	6.841e-11	6.502e-10	5.0832	5.2133	5.1001	5.4757	4.7655	0	0	0	0	0		5.12756
Gm10269	7.257e-08	3.67e-07	4.926	5.4128	5.4854	4.1043	5.591	0	0	0	0	0		5.1039
Rpl35	7.257e-08	3.67e-07	4.926	5.4128	5.4854	4.1043	5.591	0	0	0	0	0		5.1039
Synpr	3.662e-13	9.305e-12	5.009	5.1819	5.1859	5.2016	4.9069	0	0	0	0	0		5.09706
Slc16a7	1.987e-13	5.609e-12	5.0488	4.9955	5.2965	5.009	5.0875	0	0	0	0	0		5.08746
Fhl2	7.075e-10	5.349e-09	5.3183	5.1579	4.5236	4.926	5.3363	0	0	0	0	0		5.05242
Map2k2	6.178e-10	4.745e-09	4.9307	4.7918	4.9165	4.9819	5.6323	0	0	0	0	0		5.05064
Enah	3.422e-08	1.83e-07	4.8875	4.797	4.591	4.9117	5.9955	0	0	0	0	0		5.03654
Pex5l	6.643e-10	5.073e-09	4.991	5.0135	5.4854	5.1043	4.5484	0	0	0	0	0		5.02852
Kalrn	5.952e-14	2.247e-12	4.8629	5.0444	5.0661	5.009	5.1457	0	0	0	0	0		5.02562
Kalrn	5.952e-14	2.247e-12	4.8629	5.0444	5.0661	5.009	5.1457	0	0	0	0	0		5.02562
Rab3ip	4.957e-11	4.915e-10	4.8728	4.9402	4.7918	5.3923	4.8826	0	0	0	0	0		4.97594
Ppp2r5b	4.422e-12	6.351e-11	4.6781	4.9495	4.9212	5.1416	5.0575	0	0	0	0	0		4.94958
Gatad2b	1.012e-09	7.446e-09	4.8777	5.0444	5.2365	5.1898	4.3785	0	0	0	0	0		4.94538
Acaa1a	4.362e-10	3.472e-09	5	5.2555	5.1659	4.5789	4.6206	0	0	0	0	0		4.92418
Acaa1a	4.362e-10	3.472e-09	5	5.2555	5.1659	4.5789	4.6206	0	0	0	0	0		4.92418
Eif3l	2.573e-11	2.81e-10	4.797	4.8679	4.6439	5.1293	5.1457	0	0	0	0	0		4.91676
Iqsec2	9.139e-14	3.038e-12	4.8728	4.9955	4.7334	4.926	4.9864	0	0	0	0	0		4.90282
Coro1b	3.186e-08	1.713e-07	8.0537	7.7515	7.7279	7.8492	7.8467	3.263	2.1375	3.4854	2.926	3.0356		4.8763
Rapgefl1	6.372e-11	6.146e-10	4.7866	5.1334	4.991	4.5046	4.9635	0	0	0	0	0		4.87582
KIF9	6.509e-10	4.978e-09	5.2593	4.9069	5.1001	4.5046	4.591	0	0	0	0	0		4.87238
Myo6	1.539e-09	1.085e-08	4.6554	4.7602	4.8875	4.5607	5.4725	0	0	0	0	0		4.86726
Nfib	1.366e-10	1.211e-09	4.8074	4.9864	5.0356	4.3854	4.9402	0	0	0	0	0		4.831
Cep170b	1.016e-09	7.466e-09	4.8629	4.3074	5.2365	4.7549	4.9402	0	0	0	0	0		4.82038
Acbd6	3.757e-10	3.045e-09	5.1127	4.717	4.8379	4.9955	4.3434	0	0	0	0	0		4.8013
Nes	1.575e-06	6.074e-06	5.9165	4.1293	4.433	3.991	5.4725	0	0	0	0	0		4.78846
Nampt	9.709e-09	5.865e-08	4.797	5.1659	5.121	4.0531	4.7655	0	0	0	0	0		4.7805
Ckap4	3.46e-10	2.818e-09	4.6439	5.1127	4.6088	4.3854	4.9542	0	0	0	0	0		4.741
Fam131b	3.029e-11	3.215e-10	4.3785	4.7388	4.7918	4.8972	4.8972	0	0	0	0	0		4.7407
Dnal1	1.765e-10	1.537e-09	4.7495	5.1819	4.6554	4.5046	4.5789	0	0	0	0	0		4.73406
Hbbt1	7.9e-13	1.664e-11	9.8757	10.127	10.146	10.022	9.9118	5.2172	5.3074	5.2327	5.3255	5.347		4.73054
Cacna1e	6.127e-05	0.0001766	5.3957	5.9331	5.4561	5.5699	6	1.848	2.9069	0	0	0		4.71998
Rbm26	4.852e-12	6.75e-11	4.6554	4.6206	4.706	5.009	4.591	0	0	0	0	0		4.7164
Chl1	2.157e-11	2.421e-10	4.797	4.8777	4.5607	4.8972	4.4396	0	0	0	0	0		4.71444
NOGENE	6.67e-11	6.363e-10	5.009	4.6837	4.5668	4.8022	4.3923	0	0	0	0	0		4.6908
Rgs12	4.1e-11	4.199e-10	4.7866	4.3854	4.9495	4.6496	4.5361	0	0	0	0	0		4.66144
Scyl2	6.586e-12	8.724e-11	4.706	4.8074	4.6439	4.7549	4.3646	0	0	0	0	0		4.65536
Ildr2	4.918e-14	1.984e-12	4.6668	4.797	4.6724	4.5789	4.5607	0	0	0	0	0		4.65516
Mbp	4.095e-09	2.636e-08	11.531	11.77	11.534	11.35	10.869	6.5835	6.8555	6.8265	6.5759	7.0179		4.63894
Mbp	6.903e-08	3.518e-07	11.656	11.886	11.545	11.266	10.981	6.3957	6.9932	6.6767	6.6029	7.4967		4.63376
Mbp	6.903e-08	3.518e-07	11.656	11.886	11.545	11.266	10.981	6.3957	6.9932	6.6767	6.6029	7.4967		4.63376
2610301B20Rik	5.666e-12	7.698e-11	4.717	4.7918	4.3992	4.7388	4.5046	0	0	0	0	0		4.63028
Rnf214	4.98e-12	6.907e-11	4.8176	4.4396	4.6554	4.466	4.7388	0	0	0	0	0		4.62348
Oxsm	1.965e-09	1.361e-08	5.0575	4.8875	4.2555	4.3147	4.5484	0	0	0	0	0		4.61272
Fkbp3	1.276e-10	1.143e-09	4.2705	4.4529	4.8972	4.6893	4.7495	0	0	0	0	0		4.61188
Psmd6	3.965e-11	4.082e-10	4.5668	4.2479	4.591	4.5789	4.848	0	0	0	0	0		4.56652
Gm5890	9.32e-09	5.662e-08	4.0618	4.6439	4.3854	5.2133	4.5046	0	0	0	0	0		4.5618
Bin2	3.683e-10	2.99e-09	4.7655	4.6837	4.466	4.1043	4.7655	0	0	0	0	0		4.557
Kpna1	8.52e-10	6.387e-09	4.1457	4.5361	4.7115	4.9681	4.3923	0	0	0	0	0		4.55074
Pip4k2c	1.199e-07	5.809e-07	4.2327	4.7495	4.8777	3.6554	5.1001	0	0	0	0	0		4.52308
Dffa	1.29e-09	9.264e-09	4.2327	4.9212	4.2403	4.8176	4.3923	0	0	0	0	0		4.52082
Cpd	2.675e-09	1.789e-08	4.3646	4.8679	4.8972	4.1293	4.2555	0	0	0	0	0		4.5029
Mbp	1.498e-08	8.613e-08	10.923	11.14	10.859	10.653	10.245	6.2095	6.5078	6.278	5.8379	6.5469		4.48798
Syngr3	2.931e-12	4.542e-11	4.5789	4.2327	4.591	4.4263	4.5484	0	0	0	0	0		4.47546
Nup98	2.641e-11	2.866e-10	4.6893	4.5607	4.5361	4.3147	4.2016	0	0	0	0	0		4.46048
Acp6	2.249e-11	2.513e-10	4.4396	4.2928	4.5668	4.2016	4.6724	0	0	0	0	0		4.43464
Pgam5	1.857e-10	1.601e-09	4.4128	4.079	4.3074	4.7388	4.5607	0	0	0	0	0		4.41974
Pgam5	1.857e-10	1.601e-09	4.4128	4.079	4.3074	4.7388	4.5607	0	0	0	0	0		4.41974
Rnf213	2.369e-12	3.926e-11	4.5789	4.479	4.2016	4.4263	4.3291	0	0	0	0	0		4.40298
Glrx2	1.58e-09	1.112e-08	4.2479	4.009	4.8278	4.5423	4.1859	0	0	0	0	0		4.36258
Gcsh	6.032e-08	3.104e-07	4.4983	4.6611	3.6781	3.991	4.9402	0	0	0	0	0		4.35374
Ndufaf2	2.105e-07	9.769e-07	4.2555	4.5236	4.5484	4.9402	3.3505	0	0	0	0	0		4.32364
Prrc2a	1.269e-11	1.511e-10	4.2172	4.3576	4.591	4.1538	4.225	0	0	0	0	0		4.30892
Sh3glb1	1.953e-05	6.121e-05	5.121	5.1977	5.0224	5.2965	4.3646	1.585	0	0	2.0356	0		4.27632
Snrpb	1.043e-09	7.582e-09	6.7722	6.6103	6.797	6.4094	6.8112	2.7225	2.433	2.2928	2.0704	2.5361		4.26906
Tmsb15l	4.826e-10	3.807e-09	4.5361	4.4396	4.3434	4.1538	3.848	0	0	0	0	0		4.26418
Dgkg	7.974e-08	3.999e-07	4.2327	4.1859	3.797	3.9635	5.1375	0	0	0	0	0		4.26332
Faim2	2.034e-10	1.733e-09	4.1293	3.991	4.1457	4.5236	4.5173	0	0	0	0	0		4.26138
Reps1	2.579e-13	6.925e-12	4.2016	4.1457	4.406	4.1779	4.2928	0	0	0	0	0		4.2448
Fermt2	2.157e-11	2.421e-10	4.3923	4.0444	4.479	4.1779	4.1293	0	0	0	0	0		4.24458
Nek7	5.525e-11	5.407e-10	4.3923	4.3219	3.8875	4.225	4.3646	0	0	0	0	0		4.23826
Sst	1.736e-08	9.802e-08	9.1807	9.3434	9.5269	9.7497	9.0596	5.6147	5.2743	4.7602	5.0618	4.9773		4.2344
Eif5a	9.44e-09	5.728e-08	6.939	7.0433	6.6837	6.7334	7.0246	2.4594	2.2016	2.7004	3.0704	2.9449		4.20946
Ndufb7	1.561e-07	7.403e-07	6.9612	6.7866	6.8948	7.0629	6.9898	3.511	3.0179	2.0704	2.4854	2.7655		4.16902
Trim32	2.008e-06	7.542e-06	4.7866	4.6724	4.479	4.3363	4.1859	0	0	1.6323	0	0		4.16558
Hgs	2.643e-11	2.866e-10	4.2172	3.8278	4.3074	4.1779	4.1859	0	0	0	0	0		4.14324
Exoc2	6.551e-12	8.699e-11	9.3514	9.224	9.1712	9.377	9.1997	5.3001	5.0135	5.1001	5.2016	5.0224		4.13712
Fubp3	8.696e-12	1.094e-10	4.1859	3.9449	3.991	4.2016	4.3291	0	0	0	0	0		4.1305
Lgmn	7.992e-09	4.905e-08	4.1457	4.3505	4.466	3.4983	4.1859	0	0	0	0	0		4.12928
Ly6e	8.018e-14	2.806e-12	4.1457	4.0444	3.926	4.1293	4.0704	0	0	0	0	0		4.06316
Dguok	3.914e-12	5.794e-11	3.9819	4.1859	3.9727	3.9069	4.225	0	0	0	0	0		4.05448
Prr36	3.352e-11	3.508e-10	3.858	4.0618	3.858	4.1538	4.278	0	0	0	0	0		4.04192
Ppa1	2.501e-06	9.229e-06	4.479	4.3992	4.1538	2.6781	4.4396	0	0	0	0	0		4.02994
Actr1b	7.253e-09	4.483e-08	7.9565	7.9425	7.9932	7.9658	7.6935	4.121	3.6206	3.6323	4.3716	4.1127		3.93866
Rpl38	3.123e-07	1.392e-06	6.4561	6.7074	6.7562	6.3291	6.8291	3.1859	3.3219	2.2016	2.2928	2.406		3.93394
Lnpk	4.858e-08	2.532e-07	3.3923	3.6668	3.7442	4.466	4.278	0	0	0	0	0		3.90946
Mrps35	3.46e-08	1.847e-07	3.7442	3.8074	3.4195	3.991	4.5789	0	0	0	0	0		3.9082
Mlec	1.18e-07	5.725e-07	3.4854	4.1619	3.6668	4.6323	3.4983	0	0	0	0	0		3.88894
Tbr1	2.176e-08	1.21e-07	4.0959	4.0268	3.6439	3.2928	4.2928	0	0	0	0	0		3.87044
Serpina1d	0.0001751	0.000473	5.8654	6.0959	6.3906	5.7944	6.263	3.263	0	2.7866	2.511	2.6323		3.84328
Eef1e1	3.381e-09	2.225e-08	3.6206	3.8074	3.6439	3.7225	4.3785	0	0	0	0	0		3.83458
Usp39	3.177e-09	2.104e-08	3.8972	3.406	3.8176	4.2705	3.7549	0	0	0	0	0		3.82924
Lrrc47	3.558e-06	1.276e-05	4.2172	4.1127	4.1293	4.406	3.8278	0	0	1.6323	0	0		3.81214
Cdk14	2.633e-10	2.188e-09	4.0356	3.5729	4.0179	3.6206	3.6781	0	0	0	0	0		3.78502
Serpinh1	6.195e-14	2.306e-12	3.6668	3.8875	3.797	3.7866	3.7761	0	0	0	0	0		3.7828
Ddi2	1.634e-07	7.74e-07	6.7892	6.55	6.4643	6.3663	6.6907	2.8679	2.9449	2.433	2.263	3.4725		3.77584
Ppfia4	4.789e-08	2.498e-07	7.3663	7.5078	7.2946	7.2724	7.2658	4.2327	3.406	3.7655	3.4463	3.1538		3.74052
1700009N14Rik	4.051e-10	3.249e-09	8.9159	8.8802	8.8617	8.5477	8.8774	5.1293	5.3001	5.0832	4.8074	5.0959		3.7334
Cops5	6.813e-10	5.193e-09	3.7442	3.7655	3.8875	3.9355	3.3074	0	0	0	0	0		3.72802
Dnajc11	2.24e-07	1.029e-06	6.479	6.5789	6.4709	6.0488	6.0531	2.8875	3.2928	2.1375	2.5607	2.4594		3.65856
Lynx1	1.287e-08	7.547e-08	3.848	3.7655	3.3923	3.1538	4.009	0	0	0	0	0		3.63372
Eif3k	1.451e-10	1.281e-09	3.2327	3.6206	3.6668	3.7225	3.4983	0	0	0	0	0		3.54818
Grk2	2.168e-06	8.075e-06	2.511	3.263	3.7225	4.0268	4.1127	0	0	0	0	0		3.5272
Map4	3.948e-09	2.551e-08	10.22	9.7134	9.7879	10.084	9.6071	6.382	6.5699	6.2288	6.2403	6.3628		3.52572
Slc9a1	2.097e-06	7.834e-06	2.3785	3.5969	3.797	3.9069	3.9449	0	0	0	0	0		3.52484
Slc9a1	2.097e-06	7.834e-06	2.3785	3.5969	3.797	3.9069	3.9449	0	0	0	0	0		3.52484
Glg1	1.377e-08	7.999e-08	3.4594	3.7655	3.1859	3.1538	3.9165	0	0	0	0	0		3.49622
Cd200	3.373e-09	2.223e-08	6.7944	6.7252	6.8667	6.9425	6.96	3.4594	3.7549	3.0531	3.2016	3.3646		3.49104
Ak5	4.271e-08	2.244e-07	8.1436	8.394	8.3282	8.0827	8.6994	4.8679	5.3219	4.5789	4.8679	4.5607		3.49012
Cog1	3.559e-07	1.569e-06	4.0531	3.9635	3.3219	3	3	0	0	0	0	0		3.4677
Dctn5	4.049e-07	1.763e-06	3.511	3.4463	2.8074	4.2016	3.1699	0	0	0	0	0		3.42724
Dctn5	4.049e-07	1.763e-06	3.511	3.4463	2.8074	4.2016	3.1699	0	0	0	0	0		3.42724
Gnb4	3.099e-06	1.124e-05	8.3755	8.4405	8.5141	8.3983	8.4955	4.717	4.6781	6.1293	4.466	5.1699		3.41272
Hist3h2bb	2.843e-10	2.348e-09	11.841	11.993	12.109	11.792	11.725	8.5255	8.6668	8.5736	8.3716	8.3763		3.38924
Arhgap35	2.063e-10	1.756e-09	3.263	3.1043	3.5361	3.5484	3.4725	0	0	0	0	0		3.38486
Rgs17	9.039e-10	6.7e-09	3.4594	3.263	3.263	3.7549	3.1699	0	0	0	0	0		3.38204
Krt2	0.0008203	0.002017	5.6118	6.1106	5.5014	5.9307	5.6525	2.585	3.2016	3.5607	0	2.8074		3.33046
Gsta4	2.004e-08	1.122e-07	7.2649	7.2546	7.3733	7.3228	7.2201	4.0531	3.406	4.1619	3.991	4.2555		3.31364
Cdh2	3.745e-09	2.44e-08	5.8379	5.9588	5.9773	5.6177	5.5267	2.5607	2.2016	2.6323	2.3785	2.6088		3.3073
Adap1	1e-06	4.041e-06	6.2365	6.394	6.2687	6.1272	6.1189	2.1043	2.9449	3.3219	2.7442	3.4983		3.30634
Gna13	1.944e-07	9.067e-07	5.9165	6.347	6.3906	6.4145	6.7827	3.0875	3.1699	2.585	3	3.4983		3.30212
Capzb	1.312e-08	7.647e-08	7.3309	7.3646	7.1169	7.3794	7.0682	4.121	4.3646	3.6088	4.0704	4.0531		3.20842
Pck2	8.487e-09	5.186e-08	2.9819	3.0179	3.1043	3.1538	3.7004	0	0	0	0	0		3.19166
Fis1	1.998e-10	1.706e-09	8.7004	8.6033	8.6467	8.7421	8.9272	5.5759	5.6439	5.4128	5.406	5.6921		3.1778
Rbm3	1.615e-06	6.206e-06	6.8099	7.0928	6.9646	6.9425	7.1457	3.926	4.0356	4.1619	2.8875	4.225		3.1439
Des	8.678e-07	3.541e-06	6.4212	6.6059	6.2946	6.3001	6.3906	3.1538	4.1619	3.0179	3.1538	2.926		3.1198
Gad2	6.673e-07	2.77e-06	3.0179	3.3785	2.6323	2.6088	3.7549	0	0	0	0	0		3.07848
Pgp	2.283e-05	7.059e-05	8.0498	7.1679	7.69	6.8802	7.1012	4.3992	3.2327	4.6781	4.6668	4.6206		3.05834
Zyx	0.0006719	0.001677	5.3505	5.0045	5.3576	5.433	4.7279	2.7442	0	3.0356	2.7225	2.1375		3.04674
Ate1	7.891e-08	3.96e-07	3.1699	3.6206	2.7225	2.8278	2.8278	0	0	0	0	0		3.03372
Phyhip	4.705e-08	2.46e-07	7.6703	7.6689	7.6554	7.4471	7.8863	5.0661	4.479	4.4529	4.8329	5.0179		2.89584
Rad23a	2.645e-07	1.196e-06	6.2761	6.2517	6.278	5.8875	6.4026	3.4725	3.2928	3.7549	3.3646	2.7655		2.88912
Snrpn	2.013e-08	1.123e-07	5.3854	5.0959	5.5014	5.1779	5.3291	2.7225	2.433	2.2928	2.0704	2.5361		2.88698
Snrpn	2.013e-08	1.123e-07	5.3854	5.0959	5.5014	5.1779	5.3291	2.7225	2.433	2.2928	2.0704	2.5361		2.88698
Nt5dc3	8.527e-08	4.239e-07	6.0725	6.4709	5.9021	6.0356	6.717	3.4725	3.2928	3.278	3.433	3.406		2.86316
Ppp1r21	2.02e-08	1.126e-07	6.6103	6.7225	6.3558	6.6823	6.4998	3.5729	3.926	3.6323	3.4983	4.079		2.83244
Lxn	2.901e-09	1.929e-08	8.9944	8.9884	8.9192	8.9513	8.837	6.382	6.3183	5.975	5.8826	6.1477		2.79694
Cadps	1.863e-05	5.862e-05	5.9069	6.278	6.3923	6.4806	6.9248	3.5729	2.7442	3.7655	3.7334	4.3576		2.7618
Psap	1.673e-08	9.505e-08	2.511	2.8679	2.511	2.7442	3.1699	0	0	0	0	0		2.7608
Rab6b	9.354e-10	6.914e-09	6.2724	6.4009	6.4967	6.1022	6.5188	3.5729	3.7334	3.6088	3.5236	3.5484		2.76078
Poldip3	1.406e-06	5.491e-06	5.0488	5.2705	5.0618	4.7866	4.5607	1.7655	2.585	2.2327	2.6323	1.8875		2.72508
Snap29	5.221e-08	2.713e-07	5.1859	5.121	5.1127	5.4951	5.2668	2.7866	2.6554	2.5361	2.0704	2.5607		2.71446
Cpe	1.151e-08	6.86e-08	6.8592	7.0268	6.824	7.0257	6.5454	4.3992	3.9819	4.1043	4.1127	4.2705		2.6825
Plppr4	8.465e-08	4.212e-07	7.5353	7.6921	7.6352	7.6977	8.0986	5.4094	4.9449	4.7866	5.2327	5.0531		2.64644
Ddx42	2.016e-06	7.569e-06	5.4692	5.6264	5.4128	5.7708	5.7197	3.3219	3.406	2.9069	2.3219	3.263		2.55584
Ppp2cb	2.006e-08	1.122e-07	7.3505	7.3724	7.4471	7.6788	7.4967	4.7655	4.7814	4.7115	5.1619	5.1619		2.55266
Cacng8	2.385e-09	1.629e-08	8.9126	8.8154	8.9475	8.9753	8.889	6.6103	6.394	6.2172	6.438	6.1293		2.5502
Rpn1	1.287e-08	7.547e-08	7.4927	7.7094	7.6388	7.5236	7.9201	5.2211	5.3001	4.9355	4.9117	5.1898		2.54528
Pcbp3	1.892e-10	1.621e-09	7.0757	7.121	7.0135	7.1022	7.1189	4.6949	4.5969	4.3646	4.6781	4.511		2.51716
Rbm14	4.603e-10	3.647e-09	6.6235	6.6439	6.5469	6.717	6.5188	4.3219	4.1293	4.0179	3.9727	4.1619		2.48928
Gprin1	2.449e-08	1.347e-07	9.3902	9.3759	9.4643	9.5577	9.625	7.3129	7.1749	6.6991	7.0056	6.9425		2.45562
Dlg3	1.124e-08	6.703e-08	7.3889	7.3425	7.2771	7.5236	7.3724	4.8329	5.1938	5.1043	4.9542	4.6611		2.43164
Ica1	1.054e-06	4.223e-06	5.6029	5.1043	5.0224	5.4128	5.1938	2.9449	2.3785	2.6323	3.2016	3.0704		2.4217
Tinagl1	0.0003505	0.000901	4.5361	5.1659	4.0531	6.0832	4.5607	2.0356	2.1375	3.2327	2.511	2.406		2.41524
Dnajc7	1.265e-08	7.452e-08	6.0938	6.1313	5.8253	5.9236	5.9519	3.5484	3.848	3.7115	3.406	3.406		2.4012
Pde1a	9.126e-09	5.563e-08	6.4998	6.9165	6.5984	6.9093	6.9554	4.4195	4.4396	4.3992	4.263	4.3576		2.4001
Eftud2	3.412e-07	1.508e-06	5.466	5.263	5.5577	5.6264	5.2327	3.1859	3.433	2.6088	3	3.0531		2.373
Dgkz	5.227e-07	2.226e-06	5.7388	5.1252	5.5361	5.6525	5.8505	3.511	3.2327	3.3646	2.8875	3.1859		2.34428
Sf1	9.067e-08	4.483e-07	7.1158	7.0682	7.263	6.5329	7.0455	4.6724	4.6323	4.6668	4.8074	4.5969		2.32992
Ube2o	2.617e-07	1.185e-06	7.1487	7.0607	6.9588	7.1406	7.0917	5.0356	4.5298	4.3923	4.7442	5.1375		2.31222
Hars	1.451e-06	5.659e-06	6.2854	6.3906	6.2891	6.4545	5.5046	3.8074	3.9449	3.7655	3.9449	4.0531		2.28168
Ssb	2.785e-05	8.47e-05	6.2687	6.5329	6.0917	5.9819	6.375	3.2172	4	4.3147	4.1619	4.6381		2.18366
Ssb	2.785e-05	8.47e-05	6.2687	6.5329	6.0917	5.9819	6.375	3.2172	4	4.3147	4.1619	4.6381		2.18366
Rftn2	1.029e-09	7.516e-09	7.9099	7.6949	7.8833	7.8667	7.9384	5.8253	5.6177	5.5392	5.6781	5.7892		2.16874
Celf1	1.165e-08	6.916e-08	8.0677	8.0768	7.9437	7.8704	8.3156	5.9472	6.0179	5.9495	5.7306	5.8074		2.16432
Syt5	9.155e-07	3.713e-06	7.8163	7.939	8.0095	7.7688	8.2307	5.7918	5.8505	6.3975	5.6381	5.89		2.03928
Snrnp70	1.614e-07	7.648e-07	6.5329	6.4009	6.3957	6.1719	6.2761	4.3147	4.1457	4.0618	4.4725	4.6323		2.0301
Rab8a	1.43e-07	6.826e-07	7.6021	7.591	7.4504	7.382	7.6724	5.7115	5.6235	5.1619	5.6921	5.375		2.02678
Gk	1.933e-06	7.28e-06	6.5469	6.2307	6.438	6.1022	6.302	4.2555	3.8278	4.6668	4.3291	4.5484		1.99844
Ylpm1	0.0002966	0.0007734	4.5607	4.5173	5.0618	4.8629	4.7115	3.406	3.0179	3.0356	2.7225	1.585		1.98944
Bcas1	1.262e-06	4.967e-06	8.5364	8.6294	8.4516	8.3514	8.4085	6.1252	6.7495	6.354	6.3345	6.9177		1.97928
Cnpy2	2.2e-08	1.22e-07	7.6213	7.6308	7.6731	7.7582	7.4603	5.858	5.6496	5.8555	5.479	5.5759		1.94514
Refbp2	6.617e-06	2.24e-05	6.5804	6.2946	6.2441	6.3111	6.7266	4.1859	5.0661	4.5789	4.511	4.2016		1.92266
Mark3	8.667e-08	4.297e-07	6.9093	7.0224	6.7522	6.9955	7.1829	5.2327	4.8125	4.9402	5.1739	5.1252		1.91556
Lypla2	2.095e-05	6.533e-05	5.5454	5.8629	5.9402	5.9612	5.6724	3.2172	4.4396	3.9069	3.7866	4.079		1.91056
Pfdn2	7.148e-08	3.633e-07	8.1122	8.6213	8.2923	8.5733	8.4425	6.4578	6.5789	6.4026	6.4346	6.6177		1.91
Vwa1	1.686e-07	7.971e-07	7.6503	7.4396	7.8297	7.6653	7.2336	5.7629	5.5484	5.6352	5.7918	5.588		1.89844
Gria3	1.072e-06	4.281e-06	6.5407	6.717	7.009	6.6439	7.0301	5.1043	4.7004	4.8679	5.1859	4.6724		1.88196
Gria3	1.072e-06	4.281e-06	6.5407	6.717	7.009	6.6439	7.0301	5.1043	4.7004	4.8679	5.1859	4.6724		1.88196
Mrpl45	6.578e-08	3.365e-07	5.5298	5.4263	5.5969	5.4229	5.4094	3.5607	3.7115	3.9069	3.4854	3.3785		1.86846
Gga1	7.227e-08	3.668e-07	7.3681	7.1375	7.2687	7.4162	7.1064	5.4919	5.3889	5.1001	5.433	5.5638		1.86384
Dtd1	1.071e-06	4.281e-06	6.7576	6.9319	6.7495	6.7509	6.7004	5.0224	4.5668	4.6496	5.0488	5.3001		1.86052
Psmc5	2.254e-07	1.033e-06	6.55	6.853	6.7944	6.4998	6.6865	4.9727	4.5789	4.8329	4.6381	5.0661		1.859
Sem1	9.142e-07	3.711e-06	7.5283	7.611	7.3716	7.6395	7.4363	5.7306	5.9704	5.8753	5.2965	5.433		1.85618
Serpina1a	1.013e-05	3.336e-05	6.594	6.7334	6.9212	6.4346	6.8202	5.1898	4.263	4.8728	5.1659	4.843		1.83378
Serpina1e	1.013e-05	3.336e-05	6.594	6.7334	6.9212	6.4346	6.8202	5.1898	4.263	4.8728	5.1659	4.843		1.83378
Nudt21	4.366e-07	1.888e-06	6.5062	6.7536	6.5141	6.6525	6.3785	4.8022	4.853	4.7602	4.9307	4.3291		1.82594
Cdc42ep4	7.208e-06	2.427e-05	5.2668	4.8875	5.1375	5.5423	4.848	2.9635	3.121	3.4594	3.6668	3.3646		1.82136
Cdc42ep4	7.208e-06	2.427e-05	5.2668	4.8875	5.1375	5.5423	4.848	2.9635	3.121	3.4594	3.6668	3.3646		1.82136
Arf4	9.002e-07	3.657e-06	5.5577	5.641	5.6118	5.2479	5.8505	4.0444	3.9635	3.5607	3.7442	3.6668		1.78586
Arf5	9.002e-07	3.657e-06	5.5577	5.641	5.6118	5.2479	5.8505	4.0444	3.9635	3.5607	3.7442	3.6668		1.78586
Ppp1cc	0.0001017	0.0002837	6.3975	5.9977	6.4145	6.1085	6.7735	4.591	4.6206	3.7761	4.7602	5.04		1.78076
Ppp1cc	0.0001017	0.0002837	6.3975	5.9977	6.4145	6.1085	6.7735	4.591	4.6206	3.7761	4.7602	5.04		1.78076
Nck2	4.531e-07	1.955e-06	6.3416	6.2854	6.1396	6.225	6.3487	4.6264	4.0618	4.7279	4.5546	4.466		1.78072
Cep170	7.152e-07	2.955e-06	7.3872	7.5062	7.278	7.3147	7.0301	5.9069	5.3291	5.4886	5.588	5.4195		1.75682
Shank2	2.69e-06	9.888e-06	9.0685	9.0282	8.9626	9.1744	9.1591	7.5999	7.5546	7.5438	7.0323	6.9296		1.74652
Shank2	2.69e-06	9.888e-06	9.0685	9.0282	8.9626	9.1744	9.1591	7.5999	7.5546	7.5438	7.0323	6.9296		1.74652
Shank2	2.69e-06	9.888e-06	9.0685	9.0282	8.9626	9.1744	9.1591	7.5999	7.5546	7.5438	7.0323	6.9296		1.74652
Rexo2	3.696e-06	1.316e-05	5.7334	6.0747	5.7279	5.9165	6.1231	4.3434	4.079	4.6029	4.0179	3.858		1.73488
Nova1	7.925e-07	3.247e-06	5.7522	5.5607	5.7032	5.7708	6.0639	4.2095	4.3363	3.8074	3.991	3.9542		1.71048
Ppp2r5c	1.662e-06	6.371e-06	5.8048	5.7682	6.121	5.6949	6.1898	4.0875	3.9635	4.1619	4.4594	4.3992		1.70144
Sars	5.812e-09	3.657e-08	7.6294	7.808	7.8035	7.8492	7.8151	6.2479	6.0067	5.9402	6.0896	6.1477		1.69462
Stmn4	1.588e-06	6.117e-06	7.0168	7.3129	7.1396	6.8948	7.5645	5.6147	5.3854	5.347	5.479	5.6949		1.68152
Vgf	7.232e-08	3.668e-07	7.7549	7.6503	7.7827	8.0229	7.7374	6.098	6.3165	6.1599	5.9141	6.0725		1.67744
S100a13	2.472e-09	1.679e-08	7.4529	7.591	7.6745	7.4421	7.7067	5.853	5.8455	5.9236	5.9588	5.8997		1.67732
Epn2	1.298e-06	5.099e-06	5.5577	5.5141	5.1375	5.6264	5.7142	3.7334	3.7334	4.1779	3.8074	3.8278		1.654
Cnn3	6.649e-08	3.399e-07	6.0811	6.0618	6.1639	6.3398	6.1518	4.5668	4.466	4.3001	4.717	4.6206		1.62558
Ddx17	1.549e-07	7.353e-07	6.6235	6.5622	6.7442	6.5984	6.7918	5.2288	5.1977	5.1043	4.7708	4.9542		1.61286
Ddx17	1.549e-07	7.353e-07	6.6235	6.5622	6.7442	6.5984	6.7918	5.2288	5.1977	5.1043	4.7708	4.9542		1.61286
Nck1	8.666e-09	5.289e-08	6.1169	5.9093	5.8851	6.0157	6.1659	4.4594	4.3074	4.3716	4.3923	4.5173		1.60898
Tprg1l	4.458e-07	1.925e-06	5.3327	5.1579	5.4692	5.0224	5.2593	3.6781	3.8679	3.3785	3.6668	3.6088		1.60828
Actr2	4.535e-07	1.955e-06	8.9443	8.8179	8.9254	8.5767	9.1254	7.4529	7.1689	7.1001	7.3129	7.3219		1.6066
Magi2	4.241e-07	1.839e-06	6.5469	6.433	6.5683	6.717	6.2724	4.8329	4.9955	4.991	5.0747	4.6323		1.60224
Unc13a	7.161e-05	0.0002055	4.591	3.9635	4.1457	5.0618	4.6611	3	3.0531	2.6088	2.8875	3		1.57474
Epn1	7.32e-07	3.015e-06	7.3794	7.511	7.6546	7.8009	7.926	6.0917	6.1334	6.079	6.278	5.9331		1.55134
Ppif	6.26e-08	3.218e-07	6.7549	6.9212	6.7442	6.8642	6.6467	5.2172	5.2365	5.375	5.347	5		1.5511
Ppp1r13b	1.676e-07	7.931e-07	7.097	6.797	6.8802	6.6308	6.9413	5.4594	5.1619	5.2854	5.3219	5.3992		1.5437
Ctbp1	1.101e-09	7.96e-09	6.8617	6.9296	6.7306	6.9093	6.9355	5.3681	5.3505	5.3716	5.3576	5.2095		1.54188
Strn3	1.116e-05	3.662e-05	6.7197	6.8265	6.8924	7.3001	7.1303	5.0045	5.7142	5.4496	5.5638	5.4757		1.53224
Prkab2	3.176e-07	1.413e-06	5.9542	6.0618	5.9021	6.1779	5.7197	4.466	4.466	4.6264	4.4195	4.2403		1.5195
Apoe	6.38e-09	3.99e-08	8.3571	8.4081	8.3628	8.2877	8.343	6.7549	6.7918	6.9402	6.6935	6.9932		1.51702
Nova2	4.211e-07	1.829e-06	6.8265	6.6724	7.0157	7.0725	6.9692	5.466	5.4162	5.6206	5.3327	5.1898		1.5062
Prps2	1.814e-05	5.719e-05	6.2555	6.4578	6.2854	6.1022	6.5515	4.6206	4.7388	4.5173	4.9635	5.3363		1.49518
Pfdn4	1.517e-08	8.713e-08	6.9495	6.8863	6.8839	7.0056	6.8163	5.4757	5.6118	5.3363	5.2854	5.4128		1.48392
Hist2h2ac	7.864e-06	2.637e-05	9.6662	9.8197	9.6541	9.0135	9.6536	8.0827	8.2351	8.058	8.0039	8.0602		1.47344
Lgals1	3.044e-07	1.359e-06	7.9384	7.866	7.6546	7.7787	7.6802	6.5157	6.4806	6.2817	6.0917	6.3416		1.44132
Syn1	1.995e-05	6.236e-05	7.6753	7.1839	7.8022	7.9641	7.4111	6.3558	6.263	6.2555	6.0682	5.8997		1.43888
Sparcl1	3.395e-05	0.0001023	5.4692	5.7892	5.7761	6.1148	6.223	4.4263	4.5423	4.0618	4.717	4.4919		1.4266
Atp1b2	9.15e-09	5.571e-08	7.2955	7.354	7.1859	7.3957	7.3828	5.926	5.7918	5.7944	6.0045	5.975		1.42444
Syap1	1.751e-06	6.667e-06	6.3716	6.6191	6.4229	6.3663	6.3452	5.0045	5.2055	5.0575	5.1334	4.6088		1.42308
Acaa2	2.698e-06	9.901e-06	5.853	6.0747	5.8629	6.4195	5.8074	4.5668	4.479	4.7225	4.5969	4.6323		1.404
Cacnb1	2.254e-07	1.033e-06	5.8022	5.6147	5.6582	5.975	5.784	4.225	4.5789	4.4263	4.3434	4.3434		1.38342
Cacnb1	2.254e-07	1.033e-06	5.8022	5.6147	5.6582	5.975	5.784	4.225	4.5789	4.4263	4.3434	4.3434		1.38342
Camk2d	8.328e-06	2.786e-05	8.2479	7.8734	7.848	7.7129	7.5714	6.7374	6.55	6.3092	6.3398	6.4026		1.38292
Csnk2a2	2.043e-06	7.657e-06	6.3092	6.2983	6.5078	6.7293	6.8112	5.0224	5.1619	5.2854	5.1938	5.1127		1.37592
Dmxl2	3.331e-06	1.202e-05	8.138	8.1584	8.139	8.2849	8.4491	7.1568	6.9437	6.5653	6.9623	6.6949		1.36928
Pabpc4	2.762e-07	1.245e-06	7.1127	7.1385	7.354	7.0725	7.3828	6.0466	5.7087	5.9141	5.8048	5.8176		1.35374
Slc8a1	0.0002654	0.0006976	5.8202	5.5969	5.6177	5.4128	6.223	5.0356	4.2928	4.0444	4.278	4.2705		1.34986
Krt78	1.326e-05	4.304e-05	8.7902	8.4998	8.7259	8.2536	8.1669	7.2201	7.3837	7.0704	7.0757	6.983		1.3407
Mdp1	6.04e-07	2.533e-06	7.2163	6.9773	6.8802	7.0864	6.7616	5.7866	5.6264	5.7334	5.5999	5.4919		1.33672
Ggct	4.914e-05	0.0001445	5.8022	5.1334	5.7142	5.6611	5.9141	4.3716	4.0444	4.6496	4.1619	4.3219		1.33512
Etl4	0.0001523	0.0004155	7.052	6.6668	7.121	7.0466	6.394	5.4162	5.9658	5.706	5.3576	5.1619		1.33458
H1fx	1.394e-07	6.667e-07	6.9495	7.0056	6.9692	6.6653	6.8642	5.6724	5.6381	5.4886	5.4094	5.585		1.33206
Atp2b4	0.0002558	0.0006736	8.8253	8.926	8.8574	8.9123	9.2065	8.2541	7.926	7.2374	7.4346	7.2403		1.32702
Atp2b4	0.0002558	0.0006736	8.8253	8.926	8.8574	8.9123	9.2065	8.2541	7.926	7.2374	7.4346	7.2403		1.32702
Atp2b4	0.0002558	0.0006736	8.8253	8.926	8.8574	8.9123	9.2065	8.2541	7.926	7.2374	7.4346	7.2403		1.32702
Limd2	6.527e-08	3.344e-07	8.9174	8.8577	8.8583	8.718	9.0017	7.3802	7.4862	7.6206	7.5744	7.6809		1.32216
Ppp1r1a	9.815e-07	3.969e-06	7.5872	7.4709	7.6272	7.3201	7.3156	6.2172	6.1252	6.3785	6.0682	5.9284		1.3207
Crk	1.77e-05	5.594e-05	6.9236	6.9045	7.1064	7.6279	7.3407	5.7602	5.8555	5.8455	5.8022	6.0509		1.31776
Gnal	2.721e-08	1.483e-07	9.3525	9.3718	9.4237	9.2955	9.5409	8.1734	8.0285	8.058	8.2187	7.9698		1.3072
Dmxl2	4.452e-06	1.556e-05	8.088	8.0901	8.0864	8.2016	8.3854	7.1568	6.9437	6.5653	6.9623	6.6949		1.3057
Map2	3.665e-08	1.947e-07	10.463	10.442	10.538	10.536	10.375	9.2482	9.1734	9.3606	9.1096	9.0406		1.28432
Ptprz1	3.824e-09	2.48e-08	10.205	10.217	10.167	10.363	10.126	8.9316	8.9758	8.8691	8.8817	9.0006		1.28384
Txnl1	2.809e-07	1.262e-06	7.734	7.6689	7.7675	7.6568	7.3846	6.3992	6.4806	6.375	6.1957	6.3434		1.28358
Wdr13	2.819e-08	1.533e-07	8.0843	7.9955	8.1724	8.04	7.9915	6.6809	6.7642	6.9105	6.7101	6.9189		1.25982
Wipf3	3.746e-05	0.0001121	9.4223	9.0707	9.2969	9.6442	9.2928	8.3815	7.9887	7.7266	8.3403	7.9977		1.25842
Hmgb1	1.453e-06	5.661e-06	8.2789	8.247	8.3478	7.9727	8.3251	6.9565	7.264	6.8765	6.8875	6.9021		1.25698
NOGENE	1.453e-06	5.661e-06	8.2789	8.247	8.3478	7.9727	8.3251	6.9565	7.264	6.8765	6.8875	6.9021		1.25698
Eif1a	4.718e-07	2.027e-06	7.3828	7.2808	7.2882	7.4009	7.4814	6.2384	6.1457	6.302	5.9819	5.89		1.25522
Cuta	4.147e-06	1.462e-05	7.6935	7.6921	7.7629	7.9189	7.3065	6.4479	6.5141	6.5484	6.2724	6.3345		1.25132
Ptrh2	0.0008765	0.002143	4.991	4.717	4.8074	4.1538	4.7388	2.7866	3.8679	3.5236	3.2928	3.7761		1.2322
Eif3g	8.631e-05	0.0002435	4.511	4.3716	4.7334	4.8022	5.1579	3.3219	3.5729	3.3219	3.3505	3.848		1.23218
Celf4	3.479e-07	1.536e-06	7.6949	7.7866	7.7218	7.7602	8.0329	6.588	6.7197	6.4643	6.4313	6.6395		1.23072
Ewsr1	1.318e-05	4.28e-05	7.7354	7.5038	7.7032	7.2432	7.2826	6.1699	6.5759	6.1538	6.2798	6.1679		1.22418
Pafah1b2	1.009e-06	4.069e-06	7.0832	6.6823	7.1022	6.7004	6.9105	5.7279	5.7197	5.641	5.641	5.6668		1.21644
Hspa2	1.826e-07	8.57e-07	9.7192	9.7233	9.7712	10.026	9.951	8.6607	8.7539	8.5434	8.5936	8.5759		1.21264
Purb	9.944e-08	4.884e-07	7.9588	8.1153	8.1012	7.9847	8.2167	6.7722	6.9009	6.7361	7.0011	6.9177		1.20974
Brk1	9.771e-05	0.0002741	5.8802	5.8948	5.3785	5.6696	5.3434	4.5607	4.466	4.7388	4.3716	4.0179		1.2023
Snx2	2.158e-07	9.978e-07	7.1262	7.1679	7.1819	7.4446	7.1497	5.9588	6.0853	6.1497	5.8924	5.9955		1.19772
Farsa	3.498e-08	1.866e-07	7.522	7.6154	7.6596	7.4894	7.3828	6.3074	6.4043	6.2365	6.354	6.4094		1.19152
Hsd17b8	5.171e-05	0.000151	5.7576	5.8048	5.7996	5.382	5.2479	4.2928	4.5423	4.6439	4.0959	4.4594		1.19152
Actr3b	1.246e-07	6.022e-07	8.6312	8.4292	8.3336	8.4822	8.4396	7.3811	7.3264	7.12	7.3452	7.2153		1.18556
Mark4	8.536e-06	2.841e-05	6.2269	6.3165	6.0246	6.0959	6.5298	5.2327	4.8125	4.9402	5.1739	5.1252		1.18184
Arhgap21	3.584e-05	0.0001076	6.1085	6.1779	5.9977	5.9021	5.6611	5.079	4.9864	4.4529	4.6837	4.7388		1.1813
Pygb	1.229e-05	4.008e-05	7.6073	8.0163	7.9177	7.719	8.1987	6.8826	6.5561	6.585	6.7629	6.8138		1.17172
Ugp2	2.193e-08	1.217e-07	8.5857	8.5322	8.6493	8.4822	8.3824	7.4229	7.3957	7.2555	7.3794	7.3611		1.16344
Gigyf2	7.504e-06	2.523e-05	6.4529	6.4983	6.433	6.7787	6.4145	5.5141	5.5699	5.4263	5.0917	5.2095		1.15318
Ppp1r9b	2.658e-05	8.121e-05	8.6199	8.5294	8.5748	8.8176	9.1344	7.8176	7.6518	7.6191	7.406	7.4463		1.14706
Dnm1l	0.0003466	0.0008917	4.2854	4.3363	3.6781	4.6893	4.5607	3.263	3.3219	3.0179	3.3074	2.926		1.14272
Dnm1l	0.0003466	0.0008917	4.2854	4.3363	3.6781	4.6893	4.5607	3.263	3.3219	3.0179	3.3074	2.926		1.14272
Rnf25	4.035e-05	0.00012	5.1497	5.1043	5.2891	5.4229	5.2403	3.7334	4.406	3.9355	4.0531	4.3785		1.13996
H2afj	5.46e-05	0.0001586	9.7463	9.901	9.7415	9.0893	9.7447	8.5224	8.6377	8.4794	8.4417	8.4757		1.13318
Stx12	1.138e-06	4.534e-06	6.6424	6.6424	6.6991	6.4951	6.7576	5.8022	5.4094	5.3992	5.4463	5.5329		1.12932
Bcl2l13	2.162e-07	9.985e-07	6.5376	6.5173	6.3923	6.4741	6.4774	5.5014	5.1538	5.3957	5.4822	5.2965		1.11382
Dlg3	1.231e-05	4.015e-05	6.302	5.9449	6.0179	6.1148	5.9307	4.8329	5.1938	5.1043	4.9542	4.6611		1.1128
Tst	1.589e-05	5.081e-05	6.6482	6.7388	6.7032	6.4296	6.394	5.433	5.8455	5.4229	5.2705	5.4128		1.10582
Slc32a1	9.565e-05	0.0002685	6.6949	6.6611	6.7642	6.8151	7.1928	5.7918	5.5999	5.3327	5.8505	6.0422		1.1022
Csnk2b	3.269e-06	1.182e-05	5.3327	5.5141	5.4919	5.3505	5.4594	4.1779	4.2095	4.2705	4.3434	4.6724		1.09498
Mrps28	1.595e-05	5.098e-05	8.5954	8.558	8.5157	8.4947	8.6503	7.7872	7.6402	7.4894	7.1528	7.2771		1.09348
Cdk5	2.117e-09	1.457e-08	6.671	6.7589	6.6809	6.5984	6.7388	5.6554	5.6381	5.5454	5.5361	5.6235		1.0899
Map2	0.0002199	0.0005844	9.7196	9.7805	9.7296	9.767	10.425	9.127	8.5936	8.7001	8.9548	8.621		1.08504
Ptk2b	9.363e-08	4.62e-07	8.5534	8.5801	8.6323	8.4994	8.8281	7.6021	7.5204	7.4862	7.5638	7.5345		1.07726
Oxr1	1.115e-09	8.052e-09	10.623	10.61	10.71	10.662	10.705	9.6539	9.5607	9.6446	9.5542	9.5133		1.07666
Ptk2b	2.284e-08	1.261e-07	8.6246	8.646	8.7286	8.5999	8.8549	7.6724	7.6007	7.5668	7.6417	7.5954		1.0754
Fech	3.813e-06	1.353e-05	7.2104	7.0312	6.9853	7.3255	6.9045	5.8802	5.8972	6.0246	6.1334	6.1599		1.07232
Fech	3.813e-06	1.353e-05	7.2104	7.0312	6.9853	7.3255	6.9045	5.8802	5.8972	6.0246	6.1334	6.1599		1.07232
Fbxo2	2.696e-05	8.228e-05	7.6503	7.5141	7.6007	7.4627	7.8379	6.3074	6.5173	6.3398	6.6767	6.879		1.0691
Rnmt	4.508e-05	0.0001332	7.1272	7.3759	7.2432	7.382	7.3923	6.5141	6.4479	6.3957	5.9955	5.9402		1.04544
Gja1	1.537e-05	4.923e-05	7.0045	7.225	7.0853	7.1375	7.4757	6.0682	6.0938	5.926	6.2403	6.3872		1.0425
Icam5	4.364e-05	0.0001291	7.0312	6.9117	7.0715	7.4321	6.8442	5.8354	5.8125	6.1497	6.0875	6.1997		1.04118
Coro2b	1.023e-06	4.115e-06	8.4668	8.5098	8.2891	8.5106	8.2798	7.4195	7.5484	7.4094	7.2451	7.2384		1.03906
Map2k6	4.4e-06	1.54e-05	5.009	5.079	4.8176	4.9819	5.2211	4.0618	4.1619	3.7655	4.0444	3.9355		1.0279
Slc6a1	6.662e-05	0.0001915	6.7004	6.8074	6.8642	6.8061	7.2658	5.9977	5.7761	5.5699	5.8997	6.1085		1.0184
Prps1l1	3.084e-06	1.119e-05	6.6162	6.7996	6.6935	6.5714	6.8555	5.591	5.6439	5.6668	5.588	5.9681		1.01568
Prps1l3	3.084e-06	1.119e-05	6.6162	6.7996	6.6935	6.5714	6.8555	5.591	5.6439	5.6668	5.588	5.9681		1.01568
Dclk1	4.708e-07	2.026e-06	8.998	9.1051	8.979	9.0271	9.1762	8.2269	8.1038	8.0151	7.871	8.0135		1.01102
Coa6	9.3e-05	0.0002614	6.3129	6.2114	6.3237	6.8455	6.0682	5.3038	5.5046	5.3716	5.2133	5.3363		1.00642
Sema7a	3.442e-05	0.0001035	5.6439	5.7115	6.1169	6.225	5.7944	4.9542	4.8629	4.8329	5.0135	4.8074		1.00416
Skp1	1.509e-06	5.837e-06	7.0553	7.0704	7.0168	7.0757	7.4363	8.1288	8.0672	8.1257	8.1943	8.1452		-1.00134
Skp1a	1.509e-06	5.837e-06	7.0553	7.0704	7.0168	7.0757	7.4363	8.1288	8.0672	8.1257	8.1943	8.1452		-1.00134
H3f3a	2.743e-07	1.237e-06	7.7722	7.6963	7.8555	7.585	7.7327	8.6607	8.7197	8.9105	8.6699	8.6959		-1.003
Atpif1	1.299e-07	6.25e-07	8.7283	8.7692	8.7266	8.9522	8.7549	9.8897	9.7067	9.879	9.8032	9.7006		-1.0096
Atpif1	1.299e-07	6.25e-07	8.7283	8.7692	8.7266	8.9522	8.7549	9.8897	9.7067	9.879	9.8032	9.7006		-1.0096
Glrx	0.0002915	0.0007607	4.3505	4.3219	3.9069	4.7866	4.1457	5.1659	5.2211	5.3611	5.2133	5.6177		-1.0135
Rgs14	2.258e-05	6.986e-05	6.8972	6.5592	6.3434	6.9129	6.6337	7.6816	7.7163	7.5188	7.7529	7.7475		-1.01414
Pdxk	4.889e-07	2.094e-06	8.7177	8.5917	8.6195	8.4009	8.4582	9.452	9.5995	9.6014	9.6874	9.5187		-1.0142
Anp32e	0.0002209	0.0005866	5.5515	5.7629	6.0045	5.3716	5.1938	6.3992	6.7616	6.511	6.5283	6.7562		-1.0144
2021-09-05	1.247e-07	6.022e-07	9.8575	9.8947	9.9324	9.9975	10.077	10.975	10.845	10.902	11.095	11.016		-1.01478
Mkl2	1.741e-05	5.512e-05	6.9284	7.0011	7.2384	7.1589	6.5954	8.0062	7.9721	7.9966	8.0373	8.0028		-1.01856
Mkl2	1.741e-05	5.512e-05	6.9284	7.0011	7.2384	7.1589	6.5954	8.0062	7.9721	7.9966	8.0373	8.0028		-1.01856
Spag9	8.081e-05	0.0002293	3.1043	3.8074	3.5361	3.6206	3.8278	4.7761	4.5173	4.6206	4.5789	4.5173		-1.0228
Tmsb10	1.754e-05	5.548e-05	8.1769	8.1558	8.2932	8.1022	7.8138	9.0293	9.3787	9.2658	9.0076	8.9821		-1.02432
Lonp1	9.246e-06	3.058e-05	6.7814	6.879	6.7374	6.585	7.1064	8.0268	7.7067	7.7556	7.9224	7.8157		-1.0276
Nucb1	2.709e-05	8.257e-05	5.5361	5.5392	5.6639	5.2854	5.9955	6.6795	6.5653	6.5592	6.6294	6.7415		-1.03096
Clu	1.437e-09	1.022e-08	7.7853	7.8093	7.6696	7.8028	7.7184	8.8483	8.7738	8.7245	8.7954	8.7983		-1.03098
H2afv	0.0006577	0.001644	5.6496	5.433	5.3327	5.6177	4.6611	6.4757	6.5014	6.4463	6.3056	6.1334		-1.03366
H2afz	0.0006577	0.001644	5.6496	5.433	5.3327	5.6177	4.6611	6.4757	6.5014	6.4463	6.3056	6.1334		-1.03366
Arpc5	1.168e-05	3.816e-05	8.6935	8.5457	8.5434	8.5368	8.0864	9.4613	9.6352	9.5016	9.521	9.457		-1.03406
Stim1	1.805e-05	5.696e-05	5.1127	5.6525	5.5484	5.225	5.5046	6.5561	6.4919	6.5392	6.2983	6.347		-1.03786
Stim1	1.805e-05	5.696e-05	5.1127	5.6525	5.5484	5.225	5.5046	6.5561	6.4919	6.5392	6.2983	6.347		-1.03786
Copb2	0.0003839	0.0009802	6.4246	5.6264	5.4854	6.0896	5.9681	7.1241	7.029	6.8329	6.8022	7.0279		-1.0444
Tpr	5.77e-07	2.434e-06	6.5577	6.5592	6.5469	6.3505	6.7266	7.6646	7.719	7.5767	7.4846	7.5298		-1.04676
Psmb3	1.245e-06	4.916e-06	7.1497	7.2574	7.0257	7.0466	6.9853	8.1022	8.3654	8.1859	7.9761	8.0843		-1.04984
Atg16l1	3.878e-05	0.0001157	5.6781	5.6352	5.6467	5.2479	5.9635	6.6221	6.6668	6.5204	6.8875	6.732		-1.05148
Ube2m	5.168e-07	2.204e-06	7.8524	7.9977	7.8679	7.6191	7.9443	9.0285	8.8866	8.8716	8.9251	8.8335		-1.05278
Msra	0.0002595	0.0006824	4.079	3.8875	3.858	4.4463	4.0444	5.1127	4.6439	5.466	5.1375	5.225		-1.05398
Rgs20	2.319e-05	7.163e-05	4.511	4.6439	4.6724	5.0224	4.8629	6.0023	5.7306	5.5361	5.7944	5.926		-1.05536
Negr1	8.572e-06	2.848e-05	6.8265	6.848	7.3047	7.2201	6.9773	8.1462	8.0017	8.2187	8.0869	8.0039		-1.05616
Hpx	0.0003809	0.0009729	3.848	3.9727	4.3219	4.7549	4.1859	5.2479	4.9449	5.4263	5.406	5.3398		-1.0563
Hist1h2bp	1.966e-05	6.156e-05	7.5507	7.871	7.9366	7.3309	7.6518	8.7787	8.6862	8.6384	8.8747	8.6514		-1.05768
Ube2n	8.816e-05	0.0002486	7.8361	8.2221	7.8398	8.5592	7.9402	9.0912	9.2124	9.2046	8.983	9.1975		-1.05826
K-RAS	4.83e-07	2.07e-06	4.7495	4.858	4.591	4.8022	4.5484	5.926	5.7032	5.7032	5.7602	5.7549		-1.05968
Alcam	1.661e-05	5.287e-05	7.8202	8.138	7.9542	8.1436	8.4157	9.2465	9.1782	8.9887	9.3102	9.0656		-1.0635
Pip4k2a	5.835e-05	0.000169	6.8753	7.1148	7.1117	6.6653	7.433	8.2877	7.9938	8.0345	8.0885	8.1169		-1.06426
Fabp3	8.841e-06	2.931e-05	6.438	6.2384	6.3992	6.7629	6.5078	7.5141	7.5954	7.5259	7.3264	7.7252		-1.06814
Akt3	0.0001126	0.0003127	5.5236	5.5789	5.6696	5.1043	6.0067	6.8099	6.588	6.671	6.511	6.6625		-1.07186
Rab5c	3.355e-09	2.214e-08	7.8784	7.7892	7.8329	7.939	7.9904	8.9108	8.9548	8.9568	9.0062	8.9612		-1.07198
Akr1e2	9.167e-05	0.000258	3.8972	4.2016	3.8875	4.6496	4.2016	5.4594	5.1977	5.1898	5.1739	5.1938		-1.07542
Dtymk	2.539e-06	9.362e-06	5.8099	5.6696	5.5423	5.4229	5.9141	6.7142	6.7156	6.7046	6.8304	6.7918		-1.07956
Pin1	2.857e-06	1.044e-05	6.8342	6.7361	6.5157	6.3111	6.591	7.7238	7.6337	7.6893	7.614	7.7279		-1.08012
Csde1	3.044e-07	1.359e-06	5.8605	6.1779	6.0246	6.009	6.1659	7.2658	7.1064	7.04	7.1477	7.0821		-1.08082
Hsph1	2.878e-06	1.051e-05	7.7536	8.0011	7.8436	7.7669	8.1487	9.1619	8.9643	8.867	9.0469	8.8781		-1.08086
Thyn1	1.269e-06	4.99e-06	6.5407	6.5345	6.5789	6.3975	6.7225	7.6475	7.8759	7.5676	7.4757	7.6257		-1.08366
Calb1	6.088e-06	2.089e-05	9.055	9.0835	9.328	8.8762	9.138	10.201	9.9133	10.167	10.352	10.272		-1.08492
Gria4	7.811e-05	0.0002225	5.7708	5.9955	6.0135	6.2946	6.4854	7.4862	7.1375	7.2432	7.1085	7.0323		-1.08958
Asna1	9.064e-05	0.0002553	3.585	4.0444	3.797	4.3147	4.3291	5.0531	5.2517	5.1127	5.0917	5.009		-1.0896
Pdcd6ip	1.992e-07	9.276e-07	7.3733	7.5577	7.466	7.3663	7.3983	8.6206	8.5364	8.3097	8.5333	8.6125		-1.09018
Pdcd6ip	1.992e-07	9.276e-07	7.3733	7.5577	7.466	7.3663	7.3983	8.6206	8.5364	8.3097	8.5333	8.6125		-1.09018
Gm10036	1.663e-05	5.287e-05	6.8679	7.452	7.0661	6.9057	7.3345	8.2351	8.225	8.2733	8.1054	8.2389		-1.0903
Rpl11	1.663e-05	5.287e-05	6.8679	7.452	7.0661	6.9057	7.3345	8.2351	8.225	8.2733	8.1054	8.2389		-1.0903
Ank3	2.742e-08	1.492e-07	8.7495	8.8774	8.671	8.8115	8.7132	9.8731	9.9678	9.8884	9.75	9.8074		-1.09282
Lamtor3	4.87e-05	0.0001433	4.7388	5.406	4.9307	5.2593	5.2593	6.4611	6.2192	6.1396	6.0896	6.1619		-1.09546
Rap1gds1	8.555e-06	2.845e-05	7.2733	6.9542	7.5484	7.4822	7.347	8.5066	8.4225	8.2983	8.391	8.4786		-1.09838
Rps3	7.283e-05	0.0002087	5.3854	5.2327	5.2365	5.5699	5.9841	6.6963	6.5469	6.5984	6.4212	6.6395		-1.09874
Nipsnap2	9.53e-05	0.0002676	6.2891	6.079	6.2346	5.6088	6.3452	7.1869	7.0235	7.0747	7.3759	7.3966		-1.10018
Prrt2	3.289e-05	9.928e-05	7.2075	7.3129	7.4471	7.3478	7.9343	8.691	8.5721	8.4786	8.4902	8.5349		-1.10344
Anks1b	3.666e-06	1.307e-05	6.3611	6.4296	6.2891	6.6781	6.6837	7.6103	7.5736	7.4254	7.7748	7.5835		-1.1052
Madd	1.183e-06	4.692e-06	5.5014	5.6949	5.6977	5.8728	5.7004	6.9955	6.879	6.7238	6.7655	6.641		-1.10752
Prkaca	3.105e-05	9.397e-05	6.5267	6.9542	6.9955	7.0224	7.3029	8.208	8.04	7.9419	8.1064	8.0433		-1.10758
Tomm70a	2.662e-08	1.453e-07	9.6239	9.6397	9.5904	9.5867	9.7679	10.784	10.62	10.74	10.875	10.756		-1.11328
Dgkb	0.0003208	0.0008296	5.0268	5.278	4.8176	5.4951	5.843	6.594	6.3576	6.3291	6.4094	6.3416		-1.11424
Hagh	1.47e-08	8.472e-08	8.1594	8.0498	8.1674	8.1482	7.9443	9.1563	9.2099	9.2923	9.1734	9.2271		-1.11798
Hist2h3c1	7.61e-08	3.827e-07	7.7722	7.6963	7.8555	7.585	7.7327	8.785	8.8511	9.0067	8.7905	8.8103		-1.12038
Hmgcl	6.367e-06	2.174e-05	5.848	5.4463	5.5577	5.3398	5.8329	6.7004	6.6668	6.7442	6.6668	6.853		-1.1213
Pfkm	1.121e-07	5.466e-07	7.4814	7.3906	7.4471	7.5384	7.7596	8.6381	8.6571	8.6475	8.6568	8.6337		-1.12322
Sub1	4.257e-08	2.239e-07	8.1943	8.0943	8.2882	8.0763	8.2863	9.3906	9.3527	9.38	9.2508	9.2235		-1.13164
Ndufs4	3.589e-09	2.345e-08	8.4802	8.3975	8.3439	8.3242	8.3336	9.4458	9.4405	9.506	9.5821	9.5708		-1.13316
Tpm1	6.423e-06	2.189e-05	10.165	10.156	10.075	10.027	10.605	11.318	11.428	11.252	11.417	11.279		-1.1332
Cct8	5.784e-07	2.438e-06	7.0411	7.3742	7.3129	7.1839	7.4363	8.4174	8.3811	8.2831	8.4749	8.4939		-1.1404
Ndrg2	9.524e-06	3.146e-05	4.7866	4.848	5.2055	4.7708	5.04	6.1759	5.9495	5.9402	5.9658	6.347		-1.1455
Armc6	0.0001716	0.0004636	4.6147	5.3889	5.0531	5.466	4.7495	6.3201	6.2192	6.1997	6.0444	6.2288		-1.148
Tpt1	2.027e-05	6.325e-05	5.9236	5.9189	5.7576	5.433	6.0832	6.9224	6.8654	6.9105	6.9236	7.2374		-1.1486
Snrpd3	4.947e-05	0.0001452	3.9819	3.9635	3.9727	3.8176	3.278	4.9307	5.0045	4.858	5.1497	4.8278		-1.1514
Ddx6	2.695e-06	9.897e-06	5.5236	6.0378	5.8753	5.5789	5.6323	6.8924	6.824	6.8826	6.9402	6.8997		-1.1582
Ermn	0.0001034	0.0002881	6.1313	6.5759	6.029	6.6482	6.5267	7.3092	7.529	7.3759	7.5827	7.9087		-1.15888
Acadm	5.477e-07	2.327e-06	6.2441	6.1148	6.3558	6.3165	6.5515	7.4611	7.4017	7.5477	7.5797	7.394		-1.1603
Ndufs3	4.454e-08	2.331e-07	8.1075	8.109	8.0938	8.0179	8.3291	9.3908	9.2682	9.3079	9.264	9.2353		-1.16178
Pafah1b1	5.838e-07	2.458e-06	7.5236	7.4085	7.719	7.339	7.3576	8.5695	8.5094	8.6653	8.7323	8.7139		-1.16854
Tpm1	4.973e-06	1.722e-05	10.213	10.215	10.115	10.071	10.654	11.41	11.506	11.346	11.491	11.364		-1.1698
Mbp	2.98e-05	9.035e-05	7.4051	7.4396	7.1117	7.1375	7.0811	8.3966	8.487	8.4417	7.996	8.706		-1.17046
Ckb	3.076e-07	1.372e-06	12.802	12.691	12.717	12.601	12.444	13.728	13.712	13.884	13.926	13.909		-1.1808
Lcp1	2.153e-05	6.696e-05	4	4.5236	4.5668	4.079	4.1293	5.3957	5.4692	5.225	5.5454	5.5759		-1.1825
2021-09-04	6.247e-07	2.616e-06	6.3646	6.4463	6.6014	6.2612	6.4263	7.594	7.611	7.4545	7.5259	7.8285		-1.18282
Anxa5	1.946e-08	1.091e-07	7.3794	7.3742	7.5469	7.3637	7.5283	8.7132	8.6103	8.5477	8.5446	8.6928		-1.18322
Msn	4.562e-06	1.59e-05	7.3174	7.4463	7.3897	7.2489	7.6315	8.8567	8.5816	8.7011	8.3945	8.4162		-1.18326
Msn	4.562e-06	1.59e-05	7.3174	7.4463	7.3897	7.2489	7.6315	8.8567	8.5816	8.7011	8.3945	8.4162		-1.18326
Psmb4	4.369e-06	1.531e-05	4.8176	4.8972	5.0224	5.2965	5.3183	6.1599	6.1739	6.302	6.3291	6.3111		-1.1848
Hsd17b4	1.813e-07	8.519e-07	5.7866	6.0661	5.853	5.9307	6.1189	7.1829	7.2182	7.1148	7.0146	7.1538		-1.1858
Sh3gl1	4.541e-06	1.585e-05	5.0747	4.7279	5.0224	4.8329	4.7495	6.2133	5.8074	6.1579	6.225	5.9402		-1.18728
Snx6	3.356e-06	1.21e-05	5.3001	5.466	5.1699	5.0356	5.079	6.1977	6.302	6.5283	6.5759	6.3906		-1.18878
Aldh1b1	2.47e-06	9.128e-06	7.2124	6.9296	7.1148	7.3065	6.9189	8.4051	8.1997	8.4806	8.1834	8.1579		-1.1889
Erlin1	9.418e-05	0.0002646	4.1457	4.8176	4.8972	4.7225	5.1293	5.8826	5.9307	5.9977	5.8679	5.9841		-1.19014
Marcks	2.228e-08	1.233e-07	8.7859	8.6721	8.7519	8.7768	8.8122	10.084	10.028	9.8865	9.8043	9.9481		-1.1904
Ppp2r1a	4.459e-07	1.925e-06	8.7967	8.8857	8.8131	8.7675	9.1477	10.158	9.985	9.9844	10.185	10.062		-1.19274
Ppp2r2a	1.314e-08	7.649e-08	7.7807	7.7293	7.73	7.6395	7.7596	8.8833	8.7957	8.9278	9.0782	8.9236		-1.1939
Pcyt2	2.303e-07	1.054e-06	6.2307	6.487	6.3201	6.3219	6.1231	7.4611	7.6337	7.5188	7.3611	7.4782		-1.19402
Myo18a	8.712e-07	3.553e-06	7.4463	7.0853	7.1987	7.1497	7.4145	8.6337	8.4971	8.3897	8.3746	8.3703		-1.19418
Tsc22d3	5.858e-05	0.0001696	5.6865	5.3183	5.1043	5.7944	5.1169	6.6424	6.7129	6.4806	6.4346	6.7334		-1.1967
Plp1	0.0005494	0.001387	8.9165	9.3796	9.1393	8.8657	9.0045	9.9168	10.147	9.9374	10.31	10.989		-1.19892
Scrn3	4.076e-08	2.147e-07	6.5345	6.3237	6.6221	6.6029	6.4967	7.625	7.7912	7.7529	7.7361	7.6956		-1.20418
2900026A02Rik	2.622e-05	8.025e-05	4.1127	3.7115	4.1127	4.4463	3.8777	5.479	5.0959	5.2479	5.3001	5.1659		-1.20558
Syp	0.0004061	0.001035	6.7401	7.0034	6.9165	6.7629	7.7087	8.5384	7.9159	8.1001	8.3893	8.2192		-1.20626
Cdh13	2.836e-08	1.539e-07	6.4822	6.6582	6.5744	6.8112	6.6977	7.8918	7.817	7.8796	7.8208	7.8586		-1.20882
Hnrnph3	1.333e-05	4.325e-05	4.5789	4.9955	4.5361	4.4854	4.5789	5.9727	5.4983	5.8455	5.9495	5.9727		-1.21278
Uqcrh	1.454e-05	4.687e-05	6.2095	5.8777	5.8304	6.4902	6.1898	7.3102	7.394	7.4017	7.1508	7.4085		-1.21352
Cask	4.76e-06	1.652e-05	5.7032	5.375	5.5969	5.7115	5.3291	6.9519	6.5561	6.9331	6.6668	6.6865		-1.21574
Mapt	1.36e-05	4.405e-05	6.4246	6.3345	6.3147	6.5423	6.4463	7.5267	8.0715	7.7415	7.4246	7.4153		-1.22344
Mapt	1.36e-05	4.405e-05	6.4246	6.3345	6.3147	6.5423	6.4463	7.5267	8.0715	7.7415	7.4246	7.4153		-1.22344
Kpnb1	1.365e-07	6.542e-07	6.55	6.4643	6.7616	6.7944	6.6014	7.8985	7.8291	7.7435	7.9419	7.882		-1.22466
Ilf3	2.317e-06	8.598e-06	4.6264	4.9402	5.0045	4.5046	4.591	6.0531	5.9887	5.9045	5.926	5.9425		-1.22962
Marcks	1.686e-08	9.571e-08	8.7859	8.6721	8.7519	8.7768	8.8122	10.131	10.067	9.9377	9.8449	9.9898		-1.2343
Ank3	6.32e-07	2.643e-06	7.6264	7.9081	7.5569	7.8455	7.5577	8.9012	9.0631	9.0051	8.7931	8.9063		-1.23484
Nudt3	0.0001296	0.0003573	6.6865	6.3837	6.3398	5.7032	6.4919	7.4338	7.4757	7.4553	7.8144	7.6088		-1.23658
2310035C23Rik	2.292e-06	8.512e-06	5.3785	5.433	5.6639	5.1538	5.585	6.8138	6.7918	6.5204	6.6191	6.6611		-1.2384
Vamp2	0.0004192	0.001068	6.1659	6.6162	6.7374	6.3716	7.2808	8.2398	7.7266	7.8208	7.946	7.6554		-1.24334
Eif4a1	3.437e-05	0.0001034	6.2891	6.2705	5.9932	5.6439	6.438	7.4034	7.1609	7.4774	7.4321	7.406		-1.24902
Rala	2.612e-08	1.429e-07	7.5706	7.4296	7.563	7.6235	7.5133	8.8218	8.8936	8.8927	8.6784	8.6721		-1.25172
Ndufb9	0.0001047	0.0002917	4.2854	4.5484	4.8074	4.9681	5.1293	6.0135	5.7252	5.89	6.2836	6.0959		-1.25392
Snx12	4.259e-06	1.497e-05	6.5774	6.4643	6.5789	6.9955	6.4998	8.0493	7.9577	7.8691	7.6753	7.8354		-1.25418
Snx12	4.259e-06	1.497e-05	6.5774	6.4643	6.5789	6.9955	6.4998	8.0493	7.9577	7.8691	7.6753	7.8354		-1.25418
Dars	0.0003146	0.0008147	4.1457	4.0444	3.3505	3.7866	4.5046	5.3001	5.1375	5.0045	5.1938	5.4919		-1.2592
Ptges3	1.048e-06	4.204e-06	7.866	7.8028	7.7931	7.3983	7.7502	8.8639	8.9758	8.9159	9.1241	9.0816		-1.27018
Nmt1	0.0004749	0.001205	4.8728	4.5607	3.9355	3.9069	4.2555	5.382	6.0938	5.3992	5.5577	5.511		-1.28246
Irgq	6.61e-06	2.24e-05	5.3074	5.9681	5.5423	5.4951	5.843	6.9201	6.9864	6.8654	6.9704	6.8278		-1.28284
Psip1	2.486e-06	9.18e-06	7.683	7.6417	7.8411	7.3854	7.9893	9.0531	8.9807	8.9051	9.1119	8.9114		-1.28434
Pura	1.229e-08	7.265e-08	8.7313	8.7122	8.655	8.4822	8.6355	9.9908	9.8767	10.029	9.8668	9.884		-1.28622
Cox7a2	1.891e-08	1.062e-07	7.3863	7.3811	7.1967	7.3363	7.5173	8.5872	8.7334	8.6014	8.6938	8.6421		-1.28804
Ap2m1	1.908e-07	8.917e-07	8.6446	8.6051	8.5988	8.4561	8.8906	10.012	9.851	9.8496	9.9973	9.9368		-1.2903
Ap2m1	1.908e-07	8.917e-07	8.6446	8.6051	8.5988	8.4561	8.8906	10.012	9.851	9.8496	9.9973	9.9368		-1.2903
Rpl7	2.82e-05	8.571e-05	5.9425	6.354	5.9727	6.0224	6.7101	7.5835	7.4927	7.3584	7.5538	7.4822		-1.29378
H1f0	1.156e-06	4.596e-06	6.9635	6.8654	6.8492	6.6823	6.8704	8.3434	8.3611	7.9767	7.9513	8.0752		-1.29538
Gmpr	5.165e-08	2.687e-07	7.2211	7.247	7.1679	7.1928	6.9875	8.2987	8.4894	8.5676	8.4043	8.5341		-1.29556
Rpsa	1.25e-06	4.929e-06	6.843	7.1888	7.2085	7.2172	7.1739	8.5074	8.5721	8.5353	8.2965	8.2133		-1.29864
Pvalb	7.745e-06	2.601e-05	8.0185	7.8189	7.7542	8.2046	7.9443	9.0389	9.6051	9.0867	9.3129	9.1935		-1.29932
Zc2hc1a	5.092e-07	2.174e-06	6.8379	6.8074	6.7374	7.0224	6.8009	8.1952	8.3314	8.2206	7.8826	8.0843		-1.30162
Rpl3	2.216e-05	6.866e-05	6.8455	6.9819	7.0213	6.6921	7.4943	8.4919	8.2182	8.1375	8.388	8.3201		-1.30412
Ina	4.324e-06	1.518e-05	10.94	11.171	10.917	10.951	10.831	11.997	12.381	12.369	12.049	12.545		-1.3062
Me3	4.989e-09	3.161e-08	6.7642	6.8505	6.9565	6.8985	6.9932	8.1923	8.1012	8.209	8.2075	8.2877		-1.30696
Trim28	0.0003591	0.0009208	5.7225	5.6264	5.5638	4.7549	5.975	6.9875	7.0585	6.7293	6.8316	6.5969		-1.31224
Olfm1	3.419e-09	2.245e-08	7.7748	7.8685	7.8436	7.9881	7.929	9.2886	9.2216	9.1923	9.1626	9.1009		-1.3124
Fkbp2	4.963e-09	3.149e-08	6.5683	6.594	6.5531	6.7046	6.7866	7.9484	7.9051	8.0151	7.9075	7.996		-1.3131
Tiprl	2.46e-05	7.549e-05	5.5014	5.0356	5.6206	5.8329	5.2479	6.8654	6.5622	6.7004	6.8777	6.7983		-1.31312
Hbbt1	2.394e-07	1.091e-06	9.0496	9.2133	9.3839	9.1127	9.209	10.339	10.575	10.447	10.693	10.484		-1.3139
Kpna3	2.068e-06	7.744e-06	5.6029	5.7225	5.9727	5.8099	6.1085	7.3628	7.1179	6.983	7.2307	7.1324		-1.32206
Usp5	1.241e-08	7.326e-08	7.522	7.7462	7.4709	7.6373	7.6935	8.9727	8.8511	8.9224	8.9847	8.9542		-1.32304
Diras2	8.901e-06	2.949e-05	5.5361	5.7115	5.1779	5.2016	5.6724	6.9449	6.6439	6.6191	6.9366	6.7879		-1.32658
Atp2a2	9.665e-07	3.914e-06	8.8357	9.055	9.0593	8.8872	9.3805	10.422	10.445	10.287	10.38	10.324		-1.32806
Cask	1.912e-06	7.22e-06	5.7032	5.375	5.5969	5.7115	5.3291	7.04	6.6554	7.0323	6.8215	6.8112		-1.32894
Csnk2a1	5.983e-05	0.0001729	4.9819	4.7602	5.2288	5.7708	5.2668	6.5078	6.6395	6.6235	6.4111	6.5014		-1.33496
Braf	2.969e-05	9.009e-05	5.843	5.1977	5.5236	5.7787	5.9472	7.1599	6.6991	6.9635	7.1518	7.0056		-1.33794
Dync1li2	8.893e-07	3.618e-06	5.04	4.9069	4.8379	4.4854	4.7115	6.0444	6.1957	6.1957	6.0725	6.1759		-1.3405
Cnp	0.0002546	0.0006714	10.693	10.956	10.691	10.215	10.368	11.533	11.979	11.768	11.804	12.55		-1.3422
Rap1gap	1.105e-07	5.39e-07	5.4094	5.0875	5.2365	5.2133	5.3038	6.5999	6.3975	6.6191	6.7347	6.6366		-1.34746
Arhgef7	2.625e-08	1.435e-07	5.9378	5.8151	5.8802	5.9819	5.6467	7.2288	7.2365	7.2527	7.1629	7.12		-1.34784
Klc2	1.745e-05	5.522e-05	4.2172	4.6206	4.1859	4.466	4.9307	5.9449	5.8802	5.6724	5.7279	5.9449		-1.34998
Nt5c	1.136e-05	3.719e-05	5.3716	5.1977	4.8777	4.7388	4.7115	6.4111	6.2153	6.3716	6.1997	6.4496		-1.35
Nenf	3.845e-07	1.684e-06	6.223	6.1859	6.0023	5.8505	6.3611	7.5157	7.4611	7.4862	7.4668	7.4487		-1.35114
Snx3	2.358e-06	8.725e-06	5.0661	5.1416	4.6439	5.1169	5.1859	6.2687	6.5173	6.4561	6.225	6.4479		-1.35212
Stxbp1	3.386e-08	1.813e-07	10.376	10.49	10.495	10.415	10.64	11.917	11.758	11.685	11.913	11.906		-1.3526
Ralyl	6.51e-06	2.21e-05	4.3923	4.479	3.991	4.079	4.2016	5.6177	5.9307	5.4128	5.466	5.4919		-1.35524
Gpt2	2.172e-07	1.002e-06	6.0378	5.8202	6.1957	5.843	6.0224	7.4643	7.3923	7.3646	7.1769	7.3183		-1.35946
Afg3l2	1.451e-08	8.374e-08	6.9715	6.9635	6.9319	6.8061	7.0455	8.372	8.4263	8.1609	8.2761	8.2974		-1.36284
Afg3l2	1.451e-08	8.374e-08	6.9715	6.9635	6.9319	6.8061	7.0455	8.372	8.4263	8.1609	8.2761	8.2974		-1.36284
Cttnbp2	4.711e-07	2.026e-06	6.6029	6.2153	6.6511	6.3452	6.585	7.7866	7.7768	7.9966	7.8316	7.8411		-1.36664
Baiap2	1.09e-06	4.349e-06	5.009	4.5361	4.7115	4.8176	4.5173	6.0661	6.0725	6.2761	5.9887	6.0268		-1.36774
Ddx3x	2.02e-05	6.306e-05	3.511	3.4463	3.8176	3.0531	3.0531	4.848	4.6554	4.6381	4.717	4.8777		-1.37102
Oat	2.422e-07	1.102e-06	5.278	5.2705	5.1938	5.6088	5.1579	6.6014	6.6337	6.7495	6.6337	6.7522		-1.3723
Arhgdia	1.522e-08	8.728e-08	7.4313	7.5797	7.3531	7.4846	7.487	8.7098	8.825	8.7715	8.9713	8.9212		-1.37262
Synpo	5.401e-08	2.801e-07	8.3716	8.4508	8.4537	8.4725	8.588	9.9316	9.871	10.005	9.6639	9.7411		-1.3752
Atp6v1d	6.226e-05	0.0001793	6.0661	5.9864	6.1957	6.5622	6.4463	8.1769	7.5992	7.5329	7.4838	7.3461		-1.37644
Sccpdh	1.436e-07	6.851e-07	6.8316	6.6424	6.8379	6.7455	6.9519	8.1699	8.1487	7.987	8.2177	8.3746		-1.37772
Fasn	1.982e-05	6.198e-05	5.9069	5.89	5.6381	5.1538	5.8972	7.0455	7.2574	6.9343	7.0246	7.1221		-1.37958
Phf24	2.294e-07	1.05e-06	5.3785	5.2133	5.4094	5.466	5.5699	6.8467	6.5999	6.9704	6.8151	6.7046		-1.37992
Hbbt1	1.493e-07	7.108e-07	9.1067	9.3097	9.4409	9.2221	9.2543	10.466	10.705	10.641	10.839	10.612		-1.38586
Ddah1	3.821e-08	2.022e-07	7.6858	7.6177	7.7361	7.9117	7.6177	9.0196	9.1704	9.2124	8.9924	9.1104		-1.38724
Tln1	0.0001767	0.0004767	6.3452	6.2346	6.1819	5.2016	6.0067	7.4553	7.4611	7.2355	7.2808	7.5181		-1.39616
Stxbp1	2.222e-08	1.231e-07	10.376	10.49	10.495	10.415	10.64	11.963	11.812	11.732	11.95	11.948		-1.3978
Hapln1	3.383e-06	1.218e-05	5.6177	5.3327	5.7814	5.6264	5.6467	6.9177	6.6668	7.2574	7.0747	7.1075		-1.40384
Cops6	1.148e-07	5.585e-07	5.9165	6.1148	5.9449	5.7787	5.975	7.3083	7.1609	7.3443	7.5062	7.4438		-1.40672
Mbp	0.0004529	0.001151	12.106	12.354	12.064	11.808	11.427	12.811	13.498	13.462	13.096	13.927		-1.407
Bcas1	1.311e-05	4.261e-05	8.866	8.9944	8.8275	8.7492	8.8099	9.9306	10.469	10.063	10.123	10.712		-1.41012
A830010M20Rik	2.837e-08	1.539e-07	5.9635	5.7279	5.717	5.6088	5.843	7.0896	7.2517	7.1447	7.2288	7.2104		-1.413
Grb2	6.35e-06	2.171e-05	6.7197	6.3434	6.5283	6.7455	7.0585	8.2167	7.9419	8.0768	8.2696	7.9675		-1.41542
Ndufa5	2.163e-07	9.985e-07	7.5407	7.6682	7.6668	7.4496	7.7184	9.0268	8.7599	9.0504	9.1812	9.1272		-1.42036
Kars	3.562e-06	1.276e-05	4.5236	4.7279	4.3363	4.7225	5.0488	6.1699	6.0488	5.9472	6.1416	6.1957		-1.42882
Psmd3	9.128e-05	0.000257	3.7115	3.433	3.9069	4.4854	4.009	5.5484	5.1977	5.2016	5.5969	5.1619		-1.43214
Pgam2	6.495e-07	2.705e-06	5.4594	5.7629	5.4854	5.6352	5.89	7.278	7.0356	7.1231	7.0715	6.8997		-1.435
Mapre3	4.37e-09	2.786e-08	7.6753	7.7502	7.6482	7.6788	7.5188	9.0674	8.9542	9.1626	9.1249	9.1596		-1.43948
Chmp2b	1.791e-07	8.428e-07	5.5699	5.3111	5.3219	5.2133	5.591	6.975	6.879	6.8227	6.8215	6.7101		-1.44022
Atp6v1d	3.851e-05	0.000115	6.0661	5.9864	6.1957	6.5622	6.4463	8.2384	7.6568	7.5895	7.5804	7.4313		-1.44794
Ralb	3.379e-07	1.497e-06	6.406	6.0246	6.3398	6.2441	6	7.6774	7.7374	7.7542	7.5014	7.585		-1.44818
Napa	6.868e-08	3.507e-07	6.394	6.5173	6.5283	6.6118	6.7827	7.996	7.9454	7.9501	8.0307	8.1854		-1.4547
Gsn	2.955e-07	1.323e-06	7.3255	7.4221	7.4951	7.2612	7.2479	8.5725	8.8348	8.7462	8.8502	9.0757		-1.46552
Acly	7.405e-08	3.738e-07	7.2498	7.1629	7.3619	7.1313	7.3949	8.8645	8.5247	8.6777	8.7609	8.8131		-1.46802
Gnb5	6.066e-06	2.084e-05	5.9681	6.1355	6.0875	5.858	6.6162	7.7649	7.4246	7.6036	7.6221	7.6169		-1.47336
Nefh	1.677e-06	6.412e-06	8.5607	8.6753	8.5995	8.6413	8.4187	9.7952	10.157	10.057	9.8602	10.414		-1.47758
Nefh	1.677e-06	6.412e-06	8.5607	8.6753	8.5995	8.6413	8.4187	9.7952	10.157	10.057	9.8602	10.414		-1.47758
Clip2	1.873e-07	8.781e-07	6.0246	5.9236	5.9093	5.9449	6.3663	7.5006	7.6206	7.4512	7.5337	7.4862		-1.48472
Nefm	1.479e-05	4.755e-05	10.835	11.081	10.745	10.764	10.918	11.956	12.39	12.343	12.22	12.864		-1.486
C2cd2l	0.0001198	0.0003314	4.1859	3.4725	4.3363	4.4263	4.6893	5.591	5.8176	5.7469	5.5361	5.9069		-1.49764
Fscn1	1.806e-10	1.565e-09	8.5125	8.5672	8.4858	8.4786	8.6636	10.013	10.052	9.9982	10.065	10.085		-1.5011
Gm15013	4.178e-06	1.471e-05	5.6724	5.2555	5.1579	5.5329	5.8972	7.08	6.96	7.0509	7.0323	6.9507		-1.5116
Inpp1	1.774e-05	5.606e-05	4.2705	4.5607	4.9212	4.4854	5.1579	6.3733	6.1106	6.1639	6.2172	6.0896		-1.51178
Mpp3	8.208e-06	2.747e-05	4	3.8875	3.8679	3.4195	3.3074	5.2172	5.0917	5.0959	5.2288	5.4094		-1.51214
Rgs10	8.145e-05	0.0002308	2.6781	3.3785	2.9069	3.6893	3.278	4.717	4.6439	4.5546	5.1001	4.5046		-1.51788
Grb2	3.657e-06	1.305e-05	6.7197	6.3434	6.5283	6.7455	7.0585	8.3147	8.0168	8.2031	8.3576	8.0933		-1.51802
Srgap3	2.166e-06	8.073e-06	4.6949	4.3363	4.1859	4.4463	4.7004	6.0853	6.04	5.8176	5.8329	6.2288		-1.52816
Srgap3	2.166e-06	8.073e-06	4.6949	4.3363	4.1859	4.4463	4.7004	6.0853	6.04	5.8176	5.8329	6.2288		-1.52816
Cstb	2.573e-05	7.884e-05	3.0531	2.7004	2.7225	3	2.511	4.8777	4.1619	4.0444	4.3646	4.1938		-1.53108
Astn1	1.189e-07	5.766e-07	4.6554	4.797	4.5361	4.9819	4.848	6.2403	6.3975	6.4094	6.3038	6.1878		-1.54408
Nrxn1	1.041e-06	4.179e-06	5.2365	5.1127	5.3001	4.7388	5.2327	6.7944	6.7156	6.7642	6.6103	6.4676		-1.54626
Lancl2	1.61e-05	5.142e-05	4.0356	4.5173	4.3074	4.4463	4.8972	6.1878	5.8605	5.7469	5.9307	6.2269		-1.5498
Ppp5c	1.533e-07	7.291e-07	6.2517	6.0378	6.2269	6.1334	6.394	7.8765	7.926	7.7827	7.5454	7.6632		-1.55
Slc12a2	1.155e-06	4.596e-06	5.6554	5.9093	5.6381	5.8099	6.0422	7.3707	7.3505	7.0821	7.3584	7.6611		-1.55358
Eif3i	2.867e-07	1.285e-06	5.2365	5.354	5.5204	5.5329	5.3854	6.7944	7.2279	6.8291	7.079	6.8728		-1.5548
Eif3i	2.867e-07	1.285e-06	5.2365	5.354	5.5204	5.5329	5.3854	6.7944	7.2279	6.8291	7.079	6.8728		-1.5548
Mark2	1.74e-07	8.197e-07	6.2269	6.3165	6.0246	6.0959	6.5298	7.8549	7.7266	7.7156	7.8436	7.8278		-1.55496
Tpm4	8.907e-08	4.407e-07	6.1396	6.1699	6.3147	6.3345	6.588	7.8367	7.8474	7.8278	7.8234	7.996		-1.55692
Prkcb	1.335e-08	7.764e-08	9.0906	9.1062	8.9293	8.9638	8.9183	10.538	10.39	10.524	10.692	10.665		-1.56016
Acsl6	5.467e-06	1.885e-05	5.1739	5.3001	5.2891	5.6611	5.8505	7.2574	6.9141	6.8329	7.0179	7.0553		-1.56058
Dpp6	3.33e-06	1.202e-05	6.946	6.9319	7.0112	6.4346	7.0938	8.6029	8.2761	8.2512	8.5577	8.5349		-1.56106
Dpp6	3.33e-06	1.202e-05	6.946	6.9319	7.0112	6.4346	7.0938	8.6029	8.2761	8.2512	8.5577	8.5349		-1.56106
Mthfd1l	1.725e-07	8.131e-07	6.1938	6.2891	6.6059	6.4296	6.5407	8.1001	8.0693	7.9824	7.7872	7.9536		-1.5667
Blmh	3.843e-07	1.684e-06	6.843	6.8629	7.0011	6.4296	6.8291	8.4145	8.3332	8.2211	8.3824	8.468		-1.5707
Ppp3cb	2.107e-06	7.864e-06	4.6949	4.3219	4.1457	3.991	4.1859	5.8753	5.9658	5.6525	5.9021	5.7996		-1.57118
Mpp1	1.357e-07	6.512e-07	5.1127	4.9955	4.9542	4.9819	4.7279	6.3273	6.591	6.433	6.5714	6.7129		-1.57268
Tomm20	2.223e-07	1.022e-06	5.8202	6.029	6.2422	6.2441	5.9355	7.7231	7.614	7.7741	7.4935	7.5699		-1.58072
Tspan2	7.214e-06	2.427e-05	5.1293	5.0959	5.5638	5.1779	5.466	6.7018	6.8777	6.7853	6.6439	7.3282		-1.5808
Cbr3	9.651e-06	3.186e-05	5.6088	5.5454	5.6525	5.7787	4.9727	6.8467	6.9773	7.1987	7.2817	7.1679		-1.58284
Slc8a2	2.501e-08	1.374e-07	6.3056	6.1659	6.2891	6.4643	6.406	7.9201	7.8499	7.7415	8.0017	8.0422		-1.5849
Stk24	2.332e-05	7.196e-05	2.7655	3.5729	3.511	3.7225	3.7225	5.1739	5.1043	5.0356	4.9021	5.1085		-1.606
Stk26	2.332e-05	7.196e-05	2.7655	3.5729	3.511	3.7225	3.7225	5.1739	5.1043	5.0356	4.9021	5.1085		-1.606
Mut	8.407e-08	4.187e-07	4.4983	4.6554	4.3716	4.3363	4.4128	6.1699	5.9542	6.1457	5.8505	6.1859		-1.60636
Psmd4	7.442e-08	3.75e-07	5.5699	5.382	5.4725	5.6088	5.6668	7.0991	7.417	7.0257	7.1508	7.0488		-1.60828
A830010M20Rik	1.292e-08	7.556e-08	5.9635	5.7279	5.717	5.6088	5.843	7.3398	7.4757	7.2761	7.3915	7.4212		-1.60882
Phyhipl	2.635e-05	8.061e-05	5.511	5.6921	5.8704	5.2365	6.3201	7.406	7.3056	7.1689	7.3724	7.4471		-1.61398
Calu	3.427e-08	1.831e-07	4.926	4.9495	5.2133	4.9819	4.9955	6.5157	6.6191	6.5546	6.8617	6.6177		-1.62052
Sar1a	5.498e-05	0.0001596	6.6323	6.6103	6.5789	6.4643	6.5157	8.4005	8.6188	8.5329	7.6781	7.6886		-1.62348
Sar1a	5.498e-05	0.0001596	6.6323	6.6103	6.5789	6.4643	6.5157	8.4005	8.6188	8.5329	7.6781	7.6886		-1.62348
Iars2	1.512e-05	4.853e-05	4.0959	4.706	4.8074	5.0618	4.9955	6.3487	6.5204	6.278	6.3363	6.3434		-1.63204
Psd	1.478e-05	4.754e-05	5.4822	5.1127	5.3889	4.7388	5.3854	6.983	7.2124	6.8517	6.6611	6.585		-1.63704
Psd	1.478e-05	4.754e-05	5.4822	5.1127	5.3889	4.7388	5.3854	6.983	7.2124	6.8517	6.6611	6.585		-1.63704
Ppp2ca	6.22e-09	3.895e-08	7.354	7.339	7.5577	7.4136	7.479	9.0848	8.8909	9.0386	9.1851	9.1313		-1.63748
Rbbp7	4.048e-06	1.429e-05	3.858	3.4725	3.9727	3.3785	3.5361	5.4757	5.1938	5.2016	5.5484	5.04		-1.64834
Lrrc7	1.148e-05	3.756e-05	6.8367	6.7074	7.1022	6.9704	6.7957	8.6151	8.9946	8.6816	8.2465	8.121		-1.64928
Aldh1a1	5.974e-07	2.512e-06	5.4822	5.6753	5.5141	5.3611	5.4594	7.2983	7.4709	6.9296	7.0949	6.9449		-1.6493
Actn1	6.529e-08	3.344e-07	8.9269	8.9242	8.7566	8.7616	9.1223	10.672	10.399	10.45	10.675	10.553		-1.65148
Lzts3	4.35e-06	1.526e-05	5.5515	5.4463	5.3327	5.5515	6.1579	7.3646	7.1303	7.3637	7.2789	7.1699		-1.6535
Pfdn5	1.943e-07	9.067e-07	5.1043	5.3992	5.2403	4.848	5.1457	6.9009	6.9331	6.6738	6.7629	6.8099		-1.66862
Sbds	2.51e-07	1.139e-06	4.4529	4.4919	4.7495	4.926	4.4128	6.1957	6.354	6.3681	6.223	6.2403		-1.6696
Dnm3	8.255e-08	4.12e-07	5.3957	5.4594	5.5078	5.3291	5.7761	7.2075	7.1064	7.0146	7.3102	7.1908		-1.67228
Ppp1cb	1.181e-06	4.687e-06	4.8629	4.9495	4.9212	4.6147	5.3111	6.6044	6.3768	6.5925	6.6907	6.7576		-1.67252
Eif2s3x	5.165e-05	0.0001509	3.4854	3.9635	4.2705	4.1779	4.7495	5.641	5.926	5.848	5.9727	5.6949		-1.68716
Eif2s3y	5.165e-05	0.0001509	3.4854	3.9635	4.2705	4.1779	4.7495	5.641	5.926	5.848	5.9727	5.6949		-1.68716
Gpx1	1.614e-10	1.41e-09	6.5204	6.5141	6.5251	6.7087	6.5157	8.1943	8.3051	8.2512	8.247	8.2771		-1.69814
Hp1bp3	1.692e-08	9.586e-08	6.6453	6.5298	6.625	6.3611	6.78	8.3047	8.3233	8.1809	8.2896	8.3729		-1.70604
Psmc6	1.633e-06	6.269e-06	5.6352	5.6865	5.5204	5.6088	6.2668	7.5141	7.5275	7.3523	7.4179	7.4471		-1.70824
Prep	5.852e-07	2.462e-06	4.9402	5.354	5.1293	5.4128	5.6118	7.1303	7.0334	6.9715	6.9378	6.9819		-1.72136
Rpl19	1.837e-05	5.789e-05	4.706	4.8379	4.7115	4.7866	5.3611	7.0334	6.7642	6.5329	6.5438	6.1436		-1.72296
Ddx46	2.326e-08	1.283e-07	5.5515	5.7787	5.8125	5.7306	5.641	7.4862	7.6337	7.3949	7.2384	7.3932		-1.72642
Tsfm	2.677e-06	9.859e-06	4.2479	4.3363	4.433	3.7866	4.1293	6.1396	5.6118	5.9565	6.1127	5.8048		-1.73846
Hmgn1	1.418e-09	1.011e-08	5.9425	5.7996	5.9021	5.8099	5.706	7.6618	7.6279	7.4902	7.4668	7.6059		-1.7385
Snx3	3.627e-07	1.596e-06	5.0661	5.1416	4.6439	5.1169	5.1859	6.6837	6.9331	6.858	6.5999	6.8009		-1.74424
Slc25a3	1.763e-06	6.704e-06	7.848	8.0084	8.1049	7.9658	8.483	10.081	9.5825	9.6893	9.9939	9.8311		-1.75354
Slc25a3	1.763e-06	6.704e-06	7.848	8.0084	8.1049	7.9658	8.483	10.081	9.5825	9.6893	9.9939	9.8311		-1.75354
Nono	7.311e-07	3.014e-06	5.9236	6.2743	6.2983	5.9449	6.5329	8.0466	8.0389	7.8028	8.0218	7.8411		-1.75544
Lhpp	1.851e-06	7.003e-06	4.5668	4.6949	4.8176	5.1538	5.1375	6.3681	6.6279	6.7184	6.8667	6.5759		-1.75728
Sncg	1.588e-06	6.117e-06	5.9681	5.784	5.7761	6.2441	5.4496	7.6596	7.6279	7.7722	7.5094	7.4668		-1.7628
Opa1	7.193e-09	4.452e-08	7.7622	7.7489	7.7688	7.5592	7.9617	9.57	9.4174	9.5046	9.5821	9.5746		-1.76958
Plekha6	8.02e-08	4.018e-07	5.8924	5.6029	5.784	5.466	5.6809	7.5857	7.503	7.5865	7.29	7.33		-1.7738
Ckap5	1.436e-08	8.3e-08	5.8022	5.7279	5.926	5.7629	5.8329	7.7977	7.6949	7.543	7.4229	7.4725		-1.77582
Scrn1	1.145e-07	5.577e-07	6.3219	6.4009	6.2422	6.5046	6.2536	7.987	7.9147	8.43	8.1195	8.1619		-1.77798
Slc25a11	1.363e-07	6.536e-07	5.6865	5.7225	5.7415	5.6865	6.079	7.6753	7.438	7.3915	7.7774	7.5384		-1.78092
Hprt1	7.111e-08	3.617e-07	5.9165	5.6809	5.8304	5.8654	6.1759	7.7918	7.591	7.5454	7.8074	7.7252		-1.79834
Hist1h1c	2.035e-09	1.406e-08	9.538	9.6359	9.7245	9.5123	9.7435	11.454	11.522	11.456	11.282	11.433		-1.79856
Hkdc1	1.405e-06	5.491e-06	4.6264	4.6554	4.797	5.3398	4.8125	6.7748	6.4263	6.6668	6.7184	6.641		-1.79924
Nefl	4.64e-06	1.612e-05	10.286	10.694	10.277	10.374	10.251	11.764	12.187	12.247	12.05	12.654		-1.804
Hpcal4	0.0002079	0.000555	4.2016	4.1619	3.8679	3.2016	4.8278	6.1699	5.9542	5.5789	5.8851	5.7225		-1.80996
Vps29	3.604e-08	1.918e-07	6.4094	6.0747	6.3785	6.4692	6.1334	8.2011	7.983	8.0623	8.1923	8.0843		-1.81156
Vps29	3.604e-08	1.918e-07	6.4094	6.0747	6.3785	6.4692	6.1334	8.2011	7.983	8.0623	8.1923	8.0843		-1.81156
Ppp1r9a	1.473e-11	1.719e-10	9.1674	9.1111	9.151	9.1965	9.1056	10.939	10.891	11.043	11.008	10.915		-1.81288
Lamtor2	7.465e-05	0.000213	3.511	4.2928	3.6439	4.6147	3.4983	5.9542	5.8851	5.4886	5.5789	5.7361		-1.81644
Suclg2	2.173e-06	8.088e-06	5.4529	4.9955	5.121	5.0875	4.6724	7.1043	6.6991	6.6753	6.9081	7.0257		-1.81664
Map4	1.103e-05	3.628e-05	4.3001	4.9117	4.6724	4.706	5.3111	6.5789	6.3219	6.5078	6.8304	6.7522		-1.81798
[truncated: 875 more rows]

## Sheet: C-H mitoch
	p value	q value	Cortex	Cortex	Cortex	Cortex	Cortex	Hippocampus	Hippocampus	Hippocampus	Hippocampus	Hippocampus		Fold of Change
[truncated: 149 more rows]

[truncated: 2 more sheets: C-S mitoch, H-S mitoch]
